# Supplementary material for: The role of anterior insular cortex inputs to dorsolateral striatum in binge alcohol drinking
Source: eLife journal article supplement (doi:10.7554/elife.77411), 2022-07-28
Supplement: fig1-data1 [file Fig1C.xlsx]

## Sheet: Sheet1
	Fluid	Session	Intake
3	Alcohol	1	0
4	Alcohol	1	1.60779
8	Alcohol	2	0
9	Alcohol	2	1.87576
13	Alcohol	3	2.1908
14	Alcohol	3	2.61266
18	Alcohol	4	2.26382
19	Alcohol	4	2.14372
23	Alcohol	5	2.84803
24	Alcohol	5	2.07673
28	Alcohol	6	3.59481
29	Alcohol	6	1.27653
33	Alcohol	7	0.493405
34	Alcohol	7	1.59566
38	Alcohol	8	1.69167
39	Alcohol	8	2.17009
43	Alcohol	9	1.90313
44	Alcohol	9	2.29775
48	Alcohol	10	3.24238
49	Alcohol	10	3.25514
53	Alcohol	11	2.06818
54	Alcohol	11	2.51254
58	Alcohol	12	1.93475
59	Alcohol	12	3.58935
63	Alcohol	13	2.26833
64	Alcohol	13	2.87148
68	Alcohol	14	2.93549
69	Alcohol	14	3.58935
73	Alcohol	15	4.06965
74	Alcohol	15	4.48668
93	Alcohol	1	3.89085
96	Alcohol	1	2.08737
97	Alcohol	1	2.70198
100	Alcohol	2	2.5939
103	Alcohol	2	3.47895
104	Alcohol	2	3.37748
107	Alcohol	3	3.89085
110	Alcohol	3	4.17473
111	Alcohol	3	4.72847
114	Alcohol	4	3.89085
117	Alcohol	4	3.47895
118	Alcohol	4	4.05297
121	Alcohol	5	6.48475
124	Alcohol	5	9.04526
125	Alcohol	5	7.43045
128	Alcohol	6	3.68452
131	Alcohol	6	3.32211
132	Alcohol	6	5.85972
135	Alcohol	7	4.29861
138	Alcohol	7	3.32211
139	Alcohol	7	4.55756
142	Alcohol	8	4.91269
145	Alcohol	8	4.65095
146	Alcohol	8	5.20864
149	Alcohol	9	4.91269
152	Alcohol	9	4.65095
153	Alcohol	9	5.85972
156	Alcohol	10	7.98312
159	Alcohol	10	8.63748
160	Alcohol	10	7.81296
163	Alcohol	11	4.7858
166	Alcohol	11	4.5033
167	Alcohol	11	4.34802
170	Alcohol	12	2.99112
173	Alcohol	12	3.85997
174	Alcohol	12	3.72687
177	Alcohol	13	4.7858
180	Alcohol	13	3.85997
181	Alcohol	13	4.34802
184	Alcohol	14	4.7858
187	Alcohol	14	4.5033
188	Alcohol	14	4.34802
191	Alcohol	15	5.38402
194	Alcohol	15	9.0066
195	Alcohol	15	6.21145
214	Alcohol	1	1.01324
216	Alcohol	1	2.04542
218	Alcohol	1	0.125188
220	Alcohol	2	0.337748
222	Alcohol	2	1.43937
224	Alcohol	2	0.312971
226	Alcohol	3	0.98853
228	Alcohol	3	1.6436
230	Alcohol	3	1.52367
232	Alcohol	4	0.527216
234	Alcohol	4	1.94244
236	Alcohol	4	1.82841
238	Alcohol	5	2.05971
240	Alcohol	5	5.35438
242	Alcohol	5	5.46401
244	Alcohol	6	0.846404
246	Alcohol	6	2.49414
248	Alcohol	6	2.21343
250	Alcohol	7	0.911512
252	Alcohol	7	1.98064
254	Alcohol	7	2.63219
256	Alcohol	8	0.664422
258	Alcohol	8	2.71421
260	Alcohol	8	2.42587
262	Alcohol	9	0.531537
264	Alcohol	9	2.34742
266	Alcohol	9	2.13003
268	Alcohol	10	1.89574
270	Alcohol	10	4.18135
272	Alcohol	10	5.0735
274	Alcohol	11	0.65108
276	Alcohol	11	2.8226
278	Alcohol	11	1.59171
280	Alcohol	12	0.97662
282	Alcohol	12	2.17123
284	Alcohol	12	0.76638
286	Alcohol	13	1.07238
288	Alcohol	13	1.66461
290	Alcohol	13	2.2674
292	Alcohol	14	1.64011
294	Alcohol	14	3.47398
296	Alcohol	14	1.53049
298	Alcohol	15	2.03443
300	Alcohol	15	3.5867
302	Alcohol	15	4.20724
