# Supplementary material for: The role of anterior insular cortex inputs to dorsolateral striatum in binge alcohol drinking
Source: eLife journal article supplement (doi:10.7554/elife.77411), 2022-07-28
Supplement: fig1-data1 [file Fig1D.xlsx]

## Sheet: Sheet1
	Fluid	Session	Intake
0	Water	1	0
1	Water	1	0
2	Water	1	14.1026
5	Water	2	9.48276
6	Water	2	14.4144
7	Water	2	32.0513
10	Water	3	24.1379
11	Water	3	18.9189
12	Water	3	31.1966
15	Water	4	23.2759
16	Water	4	22.973
17	Water	4	34.6154
20	Water	5	33.6207
21	Water	5	40.0901
22	Water	5	33.7607
25	Water	6	13.75
26	Water	6	11.0169
27	Water	6	31.8182
30	Water	7	21.25
31	Water	7	22.8814
32	Water	7	0.826446
35	Water	8	15.4167
36	Water	8	27.1186
37	Water	8	30.1653
40	Water	9	27.0833
41	Water	9	30.0847
42	Water	9	36.3636
45	Water	10	37.5
46	Water	10	48.3051
47	Water	10	54.1322
50	Water	11	34.5098
51	Water	11	27.0916
52	Water	11	36.4
55	Water	12	33.3333
56	Water	12	31.0757
57	Water	12	38.8
60	Water	13	36.0784
61	Water	13	29.4821
62	Water	13	35.2
65	Water	14	34.5098
66	Water	14	23.506
67	Water	14	37.6
70	Water	15	58.8235
71	Water	15	52.5896
72	Water	15	60
92	Water	1	33.4728
94	Water	1	33.4728
95	Water	1	20.6612
98	Water	1	17.5439
99	Water	2	29.2887
101	Water	2	20.9205
102	Water	2	20.6612
105	Water	2	26.3158
106	Water	3	33.4728
108	Water	3	29.2887
109	Water	3	33.0579
112	Water	3	21.9298
113	Water	4	25.1046
115	Water	4	29.2887
116	Water	4	20.6612
119	Water	4	17.5439
120	Water	5	54.3933
122	Water	5	62.7615
123	Water	5	61.9835
126	Water	5	57.0175
127	Water	6	24.0964
129	Water	6	28.1124
130	Water	6	23.5294
133	Water	6	29.2887
134	Water	7	24.0964
136	Water	7	24.0964
137	Water	7	15.6863
140	Water	7	20.9205
141	Water	8	24.0964
143	Water	8	20.0803
144	Water	8	27.451
147	Water	8	29.2887
148	Water	9	16.0643
150	Water	9	28.1124
151	Water	9	27.451
154	Water	9	20.9205
155	Water	10	60.241
157	Water	10	56.2249
158	Water	10	82.3529
161	Water	10	75.3138
162	Water	11	28.2258
164	Water	11	31.8725
165	Water	11	22.9885
168	Water	11	24.6914
169	Water	12	24.1935
171	Water	12	15.9363
172	Water	12	22.9885
175	Water	12	20.5761
176	Water	13	24.1935
178	Water	13	23.9044
179	Water	13	26.8199
182	Water	13	28.8066
183	Water	14	24.1935
185	Water	14	19.9203
186	Water	14	22.9885
189	Water	14	24.6914
190	Water	15	40.3226
192	Water	15	47.8088
193	Water	15	49.8084
196	Water	15	53.4979
213	Water	1	2.92887
215	Water	1	2.12766
219	Water	2	26.7782
221	Water	2	2.55319
223	Water	2	17.9687
225	Water	3	27.8689
227	Water	3	8.78661
229	Water	3	35.4717
231	Water	4	30.7377
233	Water	4	17.1548
235	Water	4	14.3396
237	Water	5	62.8458
239	Water	5	29.3388
241	Water	5	49.2424
243	Water	6	24.1935
245	Water	6	19.0083
247	Water	6	20.3065
249	Water	7	23.3871
251	Water	7	12.8099
253	Water	7	22.2222
255	Water	8	23.7903
257	Water	8	11.4407
259	Water	8	26.1364
261	Water	9	25
263	Water	9	21.1864
265	Water	9	24.6212
267	Water	10	46.8504
269	Water	10	31.25
271	Water	10	51.6981
273	Water	11	25.9843
275	Water	11	28.0335
277	Water	11	62.1212
279	Water	12	37.7953
281	Water	12	30.1255
283	Water	12	27.6515
285	Water	13	27.5862
287	Water	13	28.9796
289	Water	13	29.927
291	Water	14	32.9502
293	Water	14	32.2449
295	Water	14	40.146
297	Water	15	55.303
299	Water	15	67.4699
301	Water	15	55.3957
