# Supplementary material for: The role of anterior insular cortex inputs to dorsolateral striatum in binge alcohol drinking
Source: eLife journal article supplement (doi:10.7554/elife.77411), 2022-07-28
Supplement: fig1-data1 [file Fig1E.xlsx]

## Sheet: Sheet1
	Animal	Fluid	Slice	Amplitude	Power
0	F88	Alcohol	1	34.1735	0.05
1	F88	Alcohol	1	122.07	0.1
2	F88	Alcohol	1	125.854	0.15
3	F88	Alcohol	1	185.83	0.2
4	F88	Alcohol	1	237.181	0.25
5	F88	Alcohol	1	326.106	1
6	F88	Alcohol	2	327.502	0.05
7	F88	Alcohol	2	498.241	0.1
8	F88	Alcohol	2	661.548	0.15
9	F88	Alcohol	2	602.309	0.2
10	F88	Alcohol	2	727.212	0.25
11	F88	Alcohol	2	1068.25	1
12	F88	Alcohol	3	14.1599	0.05
13	F88	Alcohol	3	15.5807	0.1
14	F88	Alcohol	3	278.008	0.15
15	F88	Alcohol	3	204.709	0.2
16	F88	Alcohol	3	297.444	0.25
17	F88	Alcohol	3	542.948	1
18	F88	Alcohol	4	126.849	0.05
19	F88	Alcohol	4	144.387	0.1
20	F88	Alcohol	4	258.16	0.15
21	F88	Alcohol	4	237.716	0.2
22	F88	Alcohol	4	241.914	0.25
23	F88	Alcohol	4	273.209	1
24	F88	Alcohol	5	199.593	0.05
25	F88	Alcohol	5	307.422	0.1
26	F88	Alcohol	5	324.711	0.15
27	F88	Alcohol	5	460.55	0.2
28	F88	Alcohol	5	556.908	0.25
29	F88	Alcohol	5	474.258	1
30	F88	Alcohol	6	107.72	0.05
31	F88	Alcohol	6	133.391	0.1
32	F88	Alcohol	6	140.553	0.15
33	F88	Alcohol	6	214.402	0.2
34	F88	Alcohol	6	149.969	0.25
35	F88	Alcohol	6	219.491	1
36	F85	Water	1	149.232	0.05
37	F85	Water	1	328.834	0.1
38	F85	Water	1	379.198	0.15
39	F85	Water	1	421.985	0.2
40	F85	Water	1	410.657	0.25
41	F85	Water	1	611.41	1
42	F85	Water	2	160.937	0.05
43	F85	Water	2	309.24	0.1
44	F85	Water	2	534.318	0.15
45	F85	Water	2	560.02	0.2
46	F85	Water	2	560.43	0.25
47	F85	Water	2	1033.62	1
48	F85	Water	3	12.9621	0.05
49	F85	Water	3	216.373	0.1
50	F85	Water	3	246.021	0.15
51	F85	Water	3	259.485	0.2
52	F85	Water	3	422.686	0.25
53	F85	Water	3	620.224	1
54	F85	Water	4	27.1466	0.05
55	F85	Water	4	38.1609	0.1
56	F85	Water	4	52.8194	0.15
57	F85	Water	4	54.8891	0.2
58	F85	Water	4	95.1623	0.25
59	F85	Water	4	164.802	1
60	F85	Water	5	177.204	0.05
61	F85	Water	5	175.345	0.1
62	F85	Water	5	211.944	0.15
63	F85	Water	5	181.951	0.2
64	F85	Water	5	294.638	0.25
65	F85	Water	5	436.691	1
66	F85	Water	6	44.3259	0.05
67	F85	Water	6	94.4049	0.1
68	F85	Water	6	68.5958	0.15
69	F85	Water	6	122.287	0.2
70	F85	Water	6	123.497	0.25
71	F85	Water	6	324.919	1
72	F86	Alcohol	1	615.955	0.05
73	F86	Alcohol	1	955.126	0.1
74	F86	Alcohol	1	971.629	0.15
75	F86	Alcohol	1	1274.04	0.2
76	F86	Alcohol	1	1272.36	0.25
77	F86	Alcohol	1	1519.81	1
78	F86	Alcohol	2	401.18	0.05
79	F86	Alcohol	2	644.236	0.1
80	F86	Alcohol	2	868.314	0.15
81	F86	Alcohol	2	938.654	0.2
82	F86	Alcohol	2	885.9	0.25
83	F86	Alcohol	2	1155.41	1
84	F86	Alcohol	3	225.285	0.05
85	F86	Alcohol	3	454.536	0.1
86	F86	Alcohol	3	571.701	0.15
87	F86	Alcohol	3	725.368	0.2
88	F86	Alcohol	3	779.039	0.25
89	F86	Alcohol	3	1287.41	1
90	F86	Alcohol	4	257.252	0.05
91	F86	Alcohol	4	468.212	0.1
92	F86	Alcohol	4	879.737	0.15
93	F86	Alcohol	4	979.242	0.2
94	F86	Alcohol	4	1006.08	0.25
95	F86	Alcohol	4	1286.36	1
96	F86	Alcohol	5	342.45	0.05
97	F86	Alcohol	5	638.396	0.1
98	F86	Alcohol	5	807.943	0.15
99	F86	Alcohol	5	1005.55	0.2
100	F86	Alcohol	5	955.454	0.25
101	F86	Alcohol	5	1135.7	1
102	F86	Alcohol	6	726.703	0.05
103	F86	Alcohol	6	1020.08	0.1
104	F86	Alcohol	6	1160.41	0.15
105	F86	Alcohol	6	1364.18	0.2
106	F86	Alcohol	6	1437.88	0.25
107	F86	Alcohol	6	2009.19	1
108	F82	Water	1	26.7408	0.05
109	F82	Water	1	98.4449	0.1
110	F82	Water	1	141.564	0.15
111	F82	Water	1	184.052	0.2
112	F82	Water	1	205.798	0.25
113	F82	Water	1	306.293	1
114	F82	Water	2	22.7506	0.05
115	F82	Water	2	269.939	0.1
116	F82	Water	2	272.751	0.15
117	F82	Water	2	507.413	0.2
118	F82	Water	2	428.661	0.25
119	F82	Water	2	832.832	1
120	F82	Water	3	91.7701	0.05
121	F82	Water	3	80.4283	0.1
122	F82	Water	3	236.783	0.15
123	F82	Water	3	259.176	0.2
124	F82	Water	3	229.243	0.25
125	F82	Water	3	477.955	1
126	F82	Water	4	28.4545	0.05
127	F82	Water	4	69.9707	0.1
128	F82	Water	4	109.333	0.15
129	F82	Water	4	127.11	0.2
130	F82	Water	4	165.533	0.25
131	F82	Water	4	333.243	1
132	F82	Water	5	47.599	0.05
133	F82	Water	5	36.2913	0.1
134	F82	Water	5	333.222	0.15
135	F82	Water	5	382.438	0.2
136	F82	Water	5	419.39	0.25
137	F82	Water	5	942.817	1
144	F84	Water	1	14.9659	0.05
145	F84	Water	1	12.8553	0.1
146	F84	Water	1	27.8447	0.15
147	F84	Water	1	22.9921	0.2
148	F84	Water	1	24.1038	0.25
149	F84	Water	1	71.7319	1
150	F84	Water	2	20.1181	0.05
151	F84	Water	2	89.3321	0.1
152	F84	Water	2	88.0152	0.15
153	F84	Water	2	107.208	0.2
154	F84	Water	2	92.2776	0.25
155	F84	Water	2	125.858	1
162	F84	Water	4	12.5669	0.05
163	F84	Water	4	10.6174	0.1
164	F84	Water	4	14.9418	0.15
165	F84	Water	4	52.4494	0.2
166	F84	Water	4	30.7791	0.25
167	F84	Water	4	110.48	1
168	F84	Water	5	66.5478	0.05
169	F84	Water	5	89.6087	0.1
170	F84	Water	5	102.473	0.15
171	F84	Water	5	61.6963	0.2
172	F84	Water	5	99.4302	0.25
173	F84	Water	5	198.784	1
174	G7	Water	1	35.7128	0.05
175	G7	Water	1	46.9577	0.1
176	G7	Water	1	92.5777	0.15
177	G7	Water	1	96.4298	0.2
178	G7	Water	1	115.928	0.25
179	G7	Water	1	151.842	1
180	G7	Water	2	162.508	0.05
181	G7	Water	2	250.715	0.1
182	G7	Water	2	277.125	0.15
183	G7	Water	2	284.735	0.2
184	G7	Water	2	292.252	0.25
185	G7	Water	2	345.76	1
186	G7	Water	3	34.6133	0.05
187	G7	Water	3	139.053	0.1
188	G7	Water	3	245.475	0.15
189	G7	Water	3	285.298	0.2
190	G7	Water	3	361.079	0.25
191	G7	Water	3	592.151	1
192	G7	Water	4	39.1873	0.05
193	G7	Water	4	43.5203	0.1
194	G7	Water	4	59.7983	0.15
195	G7	Water	4	55.7972	0.2
196	G7	Water	4	71.6462	0.25
197	G7	Water	4	68.3825	1
198	G6	Alcohol	1	60.4327	0.05
199	G6	Alcohol	1	100.788	0.1
200	G6	Alcohol	1	157.012	0.15
201	G6	Alcohol	1	168.496	0.2
202	G6	Alcohol	1	170.353	0.25
203	G6	Alcohol	1	238.843	1
204	G6	Alcohol	2	72.5002	0.05
205	G6	Alcohol	2	133.859	0.1
206	G6	Alcohol	2	186.282	0.15
207	G6	Alcohol	2	203.822	0.2
208	G6	Alcohol	2	182.591	0.25
209	G6	Alcohol	2	288.086	1
210	G6	Alcohol	3	20.7061	0.05
211	G6	Alcohol	3	56.8048	0.1
212	G6	Alcohol	3	57.748	0.15
213	G6	Alcohol	3	69.5215	0.2
214	G6	Alcohol	3	85.1939	0.25
215	G6	Alcohol	3	150.66	1
216	G8	Alcohol	1	34.4961	0.05
217	G8	Alcohol	1	90.9843	0.1
218	G8	Alcohol	1	113.949	0.15
219	G8	Alcohol	1	135.329	0.2
220	G8	Alcohol	1	122.315	0.25
221	G8	Alcohol	1	188.992	1
222	G8	Alcohol	2	270.291	0.05
223	G8	Alcohol	2	656.363	0.1
224	G8	Alcohol	2	697.512	0.15
225	G8	Alcohol	2	792.41	0.2
226	G8	Alcohol	2	818.882	0.25
227	G8	Alcohol	2	998.244	1
228	G8	Alcohol	3	299.939	0.05
229	G8	Alcohol	3	482.882	0.1
230	G8	Alcohol	3	691.224	0.15
231	G8	Alcohol	3	811.513	0.2
232	G8	Alcohol	3	872.484	0.25
233	G8	Alcohol	3	1089.89	1
234	G8	Alcohol	4	146.356	0.05
235	G8	Alcohol	4	313.548	0.1
236	G8	Alcohol	4	467.261	0.15
237	G8	Alcohol	4	537.332	0.2
238	G8	Alcohol	4	500.431	0.25
239	G8	Alcohol	4	791.237	1
240	G8	Alcohol	5	144.66	0.05
241	G8	Alcohol	5	240.139	0.1
242	G8	Alcohol	5	283.834	0.15
243	G8	Alcohol	5	365.413	0.2
244	G8	Alcohol	5	506.843	0.25
245	G8	Alcohol	5	861.952	1
246	G8	Alcohol	6	79.0947	0.05
247	G8	Alcohol	6	255.396	0.1
248	G8	Alcohol	6	471.156	0.15
249	G8	Alcohol	6	614.23	0.2
250	G8	Alcohol	6	760.554	0.25
251	G8	Alcohol	6	1097.97	1
252	G1	Water	1	63.3845	0.05
253	G1	Water	1	231.727	0.1
254	G1	Water	1	346.394	0.15
255	G1	Water	1	423.503	0.2
256	G1	Water	1	524.109	0.25
257	G1	Water	1	733.039	1
258	G1	Water	2	72.7072	0.05
259	G1	Water	2	239.405	0.1
260	G1	Water	2	357.989	0.15
261	G1	Water	2	364.576	0.2
262	G1	Water	2	513.078	0.25
263	G1	Water	2	634.711	1
270	G1	Water	4	84.6956	0.05
271	G1	Water	4	326.254	0.1
272	G1	Water	4	489.195	0.15
273	G1	Water	4	653.472	0.2
274	G1	Water	4	732.092	0.25
275	G1	Water	4	1167.25	1
276	G1	Water	5	7.52748	0.05
277	G1	Water	5	49.4333	0.1
278	G1	Water	5	85.6992	0.15
279	G1	Water	5	107.623	0.2
280	G1	Water	5	125.424	0.25
281	G1	Water	5	222.386	1
282	G2	Alcohol	1	213.214	0.05
283	G2	Alcohol	1	301.752	0.1
284	G2	Alcohol	1	289.199	0.15
285	G2	Alcohol	1	375.884	0.2
286	G2	Alcohol	1	349.572	0.25
287	G2	Alcohol	1	553.967	1
288	G2	Alcohol	2	120.276	0.05
289	G2	Alcohol	2	177.337	0.1
290	G2	Alcohol	2	267.303	0.15
291	G2	Alcohol	2	307.26	0.2
292	G2	Alcohol	2	370.244	0.25
293	G2	Alcohol	2	449.689	1
294	G2	Alcohol	3	272.635	0.05
295	G2	Alcohol	3	478.283	0.1
296	G2	Alcohol	3	774.746	0.15
297	G2	Alcohol	3	969.902	0.2
298	G2	Alcohol	3	1026.89	0.25
299	G2	Alcohol	3	1231.2	1
300	G2	Alcohol	4	403.046	0.05
301	G2	Alcohol	4	775.475	0.1
302	G2	Alcohol	4	997.256	0.15
303	G2	Alcohol	4	1060.25	0.2
304	G2	Alcohol	4	1294.82	0.25
305	G2	Alcohol	4	1592.14	1
306	G2	Alcohol	5	249.707	0.05
307	G2	Alcohol	5	607.815	0.1
308	G2	Alcohol	5	921.869	0.15
309	G2	Alcohol	5	1048.37	0.2
310	G2	Alcohol	5	1162.12	0.25
311	G2	Alcohol	5	1635.51	1
312	G5	Water	1	87.6618	0.05
313	G5	Water	1	147.968	0.1
314	G5	Water	1	206.16	0.15
315	G5	Water	1	241.145	0.2
316	G5	Water	1	253.91	0.25
317	G5	Water	1	397.837	1
318	G5	Water	2	34.7795	0.05
319	G5	Water	2	125.299	0.1
320	G5	Water	2	184.77	0.15
321	G5	Water	2	257.241	0.2
322	G5	Water	2	288.504	0.25
323	G5	Water	2	473.452	1
324	G5	Water	3	110.432	0.05
325	G5	Water	3	632.631	0.1
326	G5	Water	3	689.39	0.15
327	G5	Water	3	470.617	0.2
328	G5	Water	3	795.108	0.25
329	G5	Water	3	838.065	1
