# Supplementary material for: The role of anterior insular cortex inputs to dorsolateral striatum in binge alcohol drinking
Source: eLife journal article supplement (doi:10.7554/elife.77411), 2022-07-28
Supplement: fig1-data1 [file Fig1F.xlsx]

## Sheet: Sheet1
	Animal	Fluid	Slice	Ratio
0	F88	Alcohol	1	2.66324
1	F88	Alcohol	2	4.78065
2	F88	Alcohol	3	2.74224
3	F88	Alcohol	4	1.77549
4	F88	Alcohol	5	2.31172
5	F85	Water	1	3.33039
6	F85	Water	2	3.17689
7	F85	Water	3	2.85985
8	F85	Water	4	4.18085
9	F85	Water	5	4.59085
10	F86	Alcohol	1	5.73748
11	F86	Alcohol	2	4.84843
12	F86	Alcohol	3	6.23807
13	F86	Alcohol	4	7.52922
14	F86	Alcohol	5	4.01051
15	F86	Alcohol	6	9.42041
16	F82	Water	1	8.05547
18	F82	Water	3	10.9557
19	F82	Water	4	12.7185
20	F82	Water	5	15.7038
21	F82	Water	6	4.9176
22	F82	Water	7	5.14798
23	F84	Water	1	4.87343
24	F84	Water	2	9.77843
25	F84	Water	3	13.8501
26	F84	Water	4	19.8902
27	F84	Water	5	7.29143
28	G7	Water	1	1.98465
29	G7	Water	2	1.84507
30	G7	Water	3	6.67257
31	G7	Water	4	1.98942
32	G6	Alcohol	1	2.26063
33	G6	Alcohol	2	3.73198
34	G6	Alcohol	3	1.96746
35	G8	Alcohol	1	2.90603
36	G8	Alcohol	2	2.66417
37	G8	Alcohol	3	1.35415
38	G8	Alcohol	4	5.09634
40	G8	Alcohol	6	2.45828
41	G1	Water	1	3.40194
42	G1	Water	2	4.45865
43	G1	Water	3	15.6726
44	G1	Water	4	3.11124
45	G1	Water	5	12.1281
46	G2	Alcohol	1	3.1891
47	G2	Alcohol	2	2.13396
48	G2	Alcohol	3	4.42416
49	G2	Alcohol	4	2.81974
50	G2	Alcohol	5	2.88698
51	G5	Water	1	2.44352
52	G5	Water	2	3.46469
53	G5	Water	3	9.12998
