# Supplementary material for: The role of anterior insular cortex inputs to dorsolateral striatum in binge alcohol drinking
Source: eLife journal article supplement (doi:10.7554/elife.77411), 2022-07-28
Supplement: fig1-data1 [file Fig1G.xlsx]

## Sheet: Sheet1
	Animal	Fluid	Slice	oPPR	Interval
1	F80	Water	1	0.779609	50
2	F80	Water	1	1.05505	75
3	F80	Water	1	0.935981	100
4	F80	Water	1	1.38485	125
5	F80	Water	1	0.726522	150
6	F80	Water	1	0.891144	175
7	F80	Water	1	0.849632	200
9	F80	Water	2	0.615873	50
10	F80	Water	2	0.255204	75
11	F80	Water	2	0.515048	100
12	F80	Water	2	0.552117	125
13	F80	Water	2	0.739983	150
14	F80	Water	2	0.972973	175
15	F80	Water	2	0.659789	200
17	F80	Water	3	0.431425	50
18	F80	Water	3	0.52514	75
19	F80	Water	3	0.37807	100
20	F80	Water	3	0.448995	125
21	F80	Water	3	0.346351	150
22	F80	Water	3	0.318004	175
23	F80	Water	3	0.434738	200
25	F80	Water	4	0.651427	50
26	F80	Water	4	0.850193	75
27	F80	Water	4	0.974694	100
28	F80	Water	4	0.887268	125
29	F80	Water	4	0.774402	150
30	F80	Water	4	0.429738	175
31	F80	Water	4	0.70885	200
33	F80	Water	5	0.244592	50
34	F80	Water	5	0.410168	75
35	F80	Water	5	0.354885	100
36	F80	Water	5	0.299795	125
37	F80	Water	5	0.310553	150
38	F80	Water	5	0.253198	175
39	F80	Water	5	0.31329	200
41	F80	Water	6	0.264181	50
42	F80	Water	6	0.282794	75
43	F80	Water	6	0.63441	100
44	F80	Water	6	0.492411	125
45	F80	Water	6	0.413093	150
46	F80	Water	6	0.476398	175
47	F80	Water	6	0.512113	200
49	F80	Water	7	0.959666	50
50	F80	Water	7	1.40728	75
51	F80	Water	7	0.966265	100
52	F80	Water	7	0.587461	125
53	F80	Water	7	0.554988	150
54	F80	Water	7	0.784135	175
55	F80	Water	7	0.410487	200
57	F80	Water	8	0.735809	50
58	F80	Water	8	0.880827	75
59	F80	Water	8	0.877622	100
60	F80	Water	8	0.769185	125
61	F80	Water	8	0.598769	150
62	F80	Water	8	0.782305	175
63	F80	Water	8	0.816273	200
65	F73	Water	1	0.479303	50
66	F73	Water	1	0.50362	75
67	F73	Water	1	0.385667	100
68	F73	Water	1	0.938417	125
69	F73	Water	1	0.570096	150
70	F73	Water	1	0.42572	175
71	F73	Water	1	0.768752	200
73	F73	Water	2	0.445228	50
74	F73	Water	2	0.624914	75
75	F73	Water	2	0.696407	100
76	F73	Water	2	0.370825	125
77	F73	Water	2	0.565012	150
78	F73	Water	2	0.599036	175
79	F73	Water	2	0.626143	200
81	F73	Water	3	1.20226	50
82	F73	Water	3	1.26698	75
83	F73	Water	3	1.49871	100
84	F73	Water	3	1.09241	125
85	F73	Water	3	1.18841	150
86	F73	Water	3	1.10123	175
87	F73	Water	3	0.945217	200
89	F73	Water	4	1.02965	50
90	F73	Water	4	0.737136	75
91	F73	Water	4	0.983877	100
92	F73	Water	4	0.609424	125
93	F73	Water	4	0.877884	150
94	F73	Water	4	0.851101	175
95	F73	Water	4	0.866926	200
97	F73	Water	5	0.727067	50
98	F73	Water	5	0.60348	75
99	F73	Water	5	0.601444	100
100	F73	Water	5	0.566156	125
101	F73	Water	5	0.605183	150
102	F73	Water	5	0.582263	175
103	F73	Water	5	0.402062	200
105	F73	Water	6	0.715902	50
106	F73	Water	6	1.08275	75
107	F73	Water	6	0.930225	100
108	F73	Water	6	1.0439	125
109	F73	Water	6	0.874116	150
110	F73	Water	6	0.848426	175
111	F73	Water	6	0.881891	200
113	F73	Water	7	0.388425	50
114	F73	Water	7	0.479674	75
115	F73	Water	7	0.486747	100
116	F73	Water	7	0.447992	125
117	F73	Water	7	0.368461	150
118	F73	Water	7	0.318957	175
119	F73	Water	7	0.335079	200
121	F72	Alcohol	1	0.856065	50
122	F72	Alcohol	1	0.951008	75
123	F72	Alcohol	1	0.933807	100
124	F72	Alcohol	1	0.873134	125
125	F72	Alcohol	1	1.01145	150
126	F72	Alcohol	1	0.971306	175
127	F72	Alcohol	1	0.817276	200
129	F72	Alcohol	2	0.375121	50
130	F72	Alcohol	2	0.311801	75
131	F72	Alcohol	2	0.342486	100
132	F72	Alcohol	2	0.420077	125
133	F72	Alcohol	2	0.269767	150
134	F72	Alcohol	2	0.438936	175
135	F72	Alcohol	2	0.430832	200
137	F72	Alcohol	3	0.394256	50
138	F72	Alcohol	3	0.515494	75
139	F72	Alcohol	3	0.316665	100
140	F72	Alcohol	3	0.451162	125
141	F72	Alcohol	3	0.390566	150
142	F72	Alcohol	3	0.369707	175
143	F72	Alcohol	3	0.267799	200
145	F72	Alcohol	4	1.03599	50
146	F72	Alcohol	4	1.41346	75
147	F72	Alcohol	4	1.21935	100
148	F72	Alcohol	4	1.04437	125
149	F72	Alcohol	4	1.70186	150
150	F72	Alcohol	4	1.64838	175
151	F72	Alcohol	4	0.683894	200
153	F72	Alcohol	5	0.777962	50
154	F72	Alcohol	5	1.33384	75
155	F72	Alcohol	5	1.01312	100
156	F72	Alcohol	5	0.723948	125
157	F72	Alcohol	5	1.14118	150
158	F72	Alcohol	5	0.967673	175
159	F72	Alcohol	5	0.880669	200
161	F72	Alcohol	6	0.832161	50
162	F72	Alcohol	6	0.948468	75
163	F72	Alcohol	6	1.00213	100
164	F72	Alcohol	6	1.25395	125
165	F72	Alcohol	6	0.885558	150
166	F72	Alcohol	6	0.76505	175
167	F72	Alcohol	6	0.866598	200
169	F72	Alcohol	7	0.769504	50
170	F72	Alcohol	7	0.668174	75
171	F72	Alcohol	7	0.860086	100
172	F72	Alcohol	7	1.05475	125
173	F72	Alcohol	7	1.11509	150
174	F72	Alcohol	7	0.825387	175
175	F72	Alcohol	7	0.863675	200
177	F78	Alcohol	1	1.41878	50
178	F78	Alcohol	1	1.41661	75
179	F78	Alcohol	1	0.754059	100
180	F78	Alcohol	1	1.18432	125
181	F78	Alcohol	1	1.06428	150
182	F78	Alcohol	1	0.837014	175
183	F78	Alcohol	1	1.02868	200
185	F78	Alcohol	2	0.88333	50
186	F78	Alcohol	2	1.08472	75
187	F78	Alcohol	2	1.15404	100
188	F78	Alcohol	2	1.17525	125
189	F78	Alcohol	2	0.964623	150
190	F78	Alcohol	2	1.14639	175
191	F78	Alcohol	2	0.901161	200
193	F78	Alcohol	3	0.573285	50
194	F78	Alcohol	3	1.08059	75
195	F78	Alcohol	3	0.962474	100
196	F78	Alcohol	3	1.03581	125
197	F78	Alcohol	3	1.1092	150
198	F78	Alcohol	3	1.0786	175
199	F78	Alcohol	3	0.74337	200
201	F78	Alcohol	4	0.789952	50
202	F78	Alcohol	4	0.844926	75
203	F78	Alcohol	4	1.21324	100
204	F78	Alcohol	4	0.970959	125
205	F78	Alcohol	4	0.684604	150
206	F78	Alcohol	4	0.736844	175
207	F78	Alcohol	4	0.918546	200
209	F78	Alcohol	5	0.895256	50
210	F78	Alcohol	5	0.908281	75
211	F78	Alcohol	5	0.834161	100
212	F78	Alcohol	5	0.870761	125
213	F78	Alcohol	5	1.1108	150
214	F78	Alcohol	5	0.868713	175
215	F78	Alcohol	5	0.749563	200
217	F78	Alcohol	6	0.771368	50
218	F78	Alcohol	6	1.12344	75
219	F78	Alcohol	6	0.820612	100
220	F78	Alcohol	6	0.834543	125
221	F78	Alcohol	6	0.830006	150
222	F78	Alcohol	6	0.872119	175
223	F78	Alcohol	6	0.642455	200
225	F78	Alcohol	7	0.547725	50
226	F78	Alcohol	7	0.625111	75
227	F78	Alcohol	7	0.667585	100
228	F78	Alcohol	7	0.655024	125
229	F78	Alcohol	7	0.801256	150
230	F78	Alcohol	7	0.596237	175
231	F78	Alcohol	7	0.600161	200
233	F75	Alcohol	1	1.15796	50
234	F75	Alcohol	1	1.20864	75
235	F75	Alcohol	1	1.09212	100
236	F75	Alcohol	1	1.11403	125
237	F75	Alcohol	1	0.776619	150
238	F75	Alcohol	1	1.09454	175
239	F75	Alcohol	1	0.947542	200
241	F75	Alcohol	2	0.908216	50
242	F75	Alcohol	2	1.12056	75
243	F75	Alcohol	2	1.07655	100
244	F75	Alcohol	2	0.849316	125
245	F75	Alcohol	2	0.777835	150
246	F75	Alcohol	2	0.723047	175
247	F75	Alcohol	2	0.881828	200
249	F75	Alcohol	3	0.821601	50
250	F75	Alcohol	3	1.08732	75
251	F75	Alcohol	3	1.09667	100
252	F75	Alcohol	3	0.981366	125
253	F75	Alcohol	3	0.685347	150
254	F75	Alcohol	3	0.869471	175
255	F75	Alcohol	3	0.812546	200
257	F75	Alcohol	4	0.707272	50
258	F75	Alcohol	4	0.932029	75
259	F75	Alcohol	4	1.11669	100
260	F75	Alcohol	4	0.874803	125
261	F75	Alcohol	4	0.754776	150
262	F75	Alcohol	4	0.819918	175
263	F75	Alcohol	4	0.800884	200
265	F75	Alcohol	5	0.829045	50
266	F75	Alcohol	5	1.16232	75
267	F75	Alcohol	5	0.734743	100
268	F75	Alcohol	5	0.815606	125
269	F75	Alcohol	5	0.980668	150
270	F75	Alcohol	5	0.446021	175
271	F75	Alcohol	5	0.760407	200
273	G7	Water	1	0.737489	50
274	G7	Water	1	0.996096	75
275	G7	Water	1	1.33673	100
276	G7	Water	1	0.944712	125
277	G7	Water	1	0.991485	150
278	G7	Water	1	1.03287	175
279	G7	Water	1	0.687376	200
281	G7	Water	2	1.01775	50
282	G7	Water	2	1.06363	75
283	G7	Water	2	1.01146	100
284	G7	Water	2	1.01473	125
285	G7	Water	2	0.773282	150
286	G7	Water	2	0.767962	175
287	G7	Water	2	0.857658	200
289	G7	Water	3	0.635307	50
290	G7	Water	3	0.906895	75
291	G7	Water	3	0.940802	100
292	G7	Water	3	1	125
293	G7	Water	3	0.89784	150
294	G7	Water	3	0.963588	175
295	G7	Water	3	0.773988	200
297	G7	Water	4	0.670324	50
298	G7	Water	4	0.781568	75
299	G7	Water	4	0.785864	100
300	G7	Water	4	0.835413	125
301	G7	Water	4	0.641104	150
302	G7	Water	4	0.828866	175
303	G7	Water	4	0.734849	200
305	G6	Alcohol	1	0.67904	50
306	G6	Alcohol	1	0.900102	75
307	G6	Alcohol	1	1.07288	100
308	G6	Alcohol	1	0.836471	125
309	G6	Alcohol	1	0.956761	150
310	G6	Alcohol	1	0.960171	175
311	G6	Alcohol	1	0.89241	200
313	G6	Alcohol	2	0.921136	50
314	G6	Alcohol	2	1.08492	75
315	G6	Alcohol	2	1.03078	100
316	G6	Alcohol	2	1.16858	125
317	G6	Alcohol	2	1.1599	150
318	G6	Alcohol	2	0.953847	175
319	G6	Alcohol	2	0.952649	200
321	G6	Alcohol	3	0.773562	50
322	G6	Alcohol	3	1.2161	75
323	G6	Alcohol	3	1.20592	100
324	G6	Alcohol	3	1.03598	125
325	G6	Alcohol	3	0.823214	150
326	G6	Alcohol	3	0.81391	175
327	G6	Alcohol	3	0.595716	200
329	G8	Alcohol	1	0.430466	50
330	G8	Alcohol	1	1.36806	75
331	G8	Alcohol	1	0.998292	100
332	G8	Alcohol	1	0.714258	125
333	G8	Alcohol	1	0.612228	150
334	G8	Alcohol	1	0.464643	175
335	G8	Alcohol	1	0.818943	200
337	G8	Alcohol	2	0.682189	50
338	G8	Alcohol	2	1.014	75
339	G8	Alcohol	2	1.15798	100
340	G8	Alcohol	2	0.814371	125
341	G8	Alcohol	2	0.848624	150
342	G8	Alcohol	2	0.681833	175
343	G8	Alcohol	2	0.869985	200
345	G8	Alcohol	3	1.30436	50
346	G8	Alcohol	3	1.17518	75
347	G8	Alcohol	3	1.1147	100
348	G8	Alcohol	3	1.07296	125
349	G8	Alcohol	3	0.996337	150
350	G8	Alcohol	3	1.05666	175
351	G8	Alcohol	3	0.965492	200
353	G8	Alcohol	4	0.931024	50
354	G8	Alcohol	4	1.24285	75
355	G8	Alcohol	4	1.47253	100
356	G8	Alcohol	4	1.12158	125
357	G8	Alcohol	4	1.03522	150
358	G8	Alcohol	4	1.15411	175
359	G8	Alcohol	4	1.26942	200
361	G1	Water	1	0.798333	50
362	G1	Water	1	0.952181	75
363	G1	Water	1	0.954066	100
364	G1	Water	1	1.06471	125
365	G1	Water	1	0.980593	150
366	G1	Water	1	0.968818	175
367	G1	Water	1	0.801145	200
369	G1	Water	2	1.14461	50
370	G1	Water	2	1.33427	75
371	G1	Water	2	1.1903	100
372	G1	Water	2	1.38598	125
373	G1	Water	2	1.39622	150
374	G1	Water	2	1.05288	175
375	G1	Water	2	1.13579	200
377	G1	Water	3	1.22063	50
378	G1	Water	3	1.21682	75
379	G1	Water	3	1.43063	100
380	G1	Water	3	1.13292	125
381	G1	Water	3	1.14817	150
382	G1	Water	3	1.11423	175
383	G1	Water	3	1.45377	200
385	G1	Water	4	1.49775	50
386	G1	Water	4	1.37979	75
387	G1	Water	4	1.43809	100
388	G1	Water	4	1.61703	125
389	G1	Water	4	1.56686	150
390	G1	Water	4	1.2788	175
391	G1	Water	4	1.21478	200
393	G1	Water	5	0.815139	50
394	G1	Water	5	1.12562	75
395	G1	Water	5	1.07454	100
396	G1	Water	5	0.842809	125
397	G1	Water	5	1.01734	150
398	G1	Water	5	0.846194	175
399	G1	Water	5	0.78	200
401	G2	Alcohol	1	1.07022	50
402	G2	Alcohol	1	1.72693	75
403	G2	Alcohol	1	1.32779	100
404	G2	Alcohol	1	1.16434	125
405	G2	Alcohol	1	1.23768	150
406	G2	Alcohol	1	1.52047	175
407	G2	Alcohol	1	1.1053	200
409	G2	Alcohol	2	0.793689	50
410	G2	Alcohol	2	1.31206	75
411	G2	Alcohol	2	1.17378	100
412	G2	Alcohol	2	1.28918	125
413	G2	Alcohol	2	1.23447	150
414	G2	Alcohol	2	1.29248	175
415	G2	Alcohol	2	0.887499	200
417	G2	Alcohol	3	1.1476	50
418	G2	Alcohol	3	1.49527	75
419	G2	Alcohol	3	1.52273	100
420	G2	Alcohol	3	1.32494	125
421	G2	Alcohol	3	1.31469	150
422	G2	Alcohol	3	1.39954	175
423	G2	Alcohol	3	1.28296	200
425	G2	Alcohol	4	1.52024	50
426	G2	Alcohol	4	2.03953	75
427	G2	Alcohol	4	1.89468	100
428	G2	Alcohol	4	1.95442	125
429	G2	Alcohol	4	1.8367	150
430	G2	Alcohol	4	1.31914	175
431	G2	Alcohol	4	1.52132	200
433	G5	Water	1	0.874442	50
434	G5	Water	1	1.24437	75
435	G5	Water	1	1.02782	100
436	G5	Water	1	1.23101	125
437	G5	Water	1	1.2416	150
438	G5	Water	1	1.00181	175
439	G5	Water	1	0.984768	200
441	G5	Water	2	0.879763	50
442	G5	Water	2	1.22194	75
443	G5	Water	2	1.20488	100
444	G5	Water	2	1.34702	125
445	G5	Water	2	1.0857	150
446	G5	Water	2	1.14834	175
447	G5	Water	2	1.01868	200
449	G5	Water	3	0.822572	50
450	G5	Water	3	1.18518	75
451	G5	Water	3	1.35196	100
452	G5	Water	3	1.19773	125
453	G5	Water	3	1.47097	150
454	G5	Water	3	1.08309	175
455	G5	Water	3	1.31913	200
