# Supplementary material for: The role of anterior insular cortex inputs to dorsolateral striatum in binge alcohol drinking
Source: eLife journal article supplement (doi:10.7554/elife.77411), 2022-07-28
Supplement: fig1-data1 [file Fig1H.xlsx]

## Sheet: Sheet1
	Animal	Fluid	Slice	Amplitude	Power
0	F88	Alcohol	1	0.123494	0.045
1	F88	Alcohol	1	0.406189	0.16
2	F88	Alcohol	1	0.635173	0.276
3	F88	Alcohol	1	0.882568	0.499
4	F88	Alcohol	1	0.941366	0.687
5	F88	Alcohol	1	0.841573	0.855
6	F88	Alcohol	1	0.879211	1.1524
7	F88	Alcohol	2	0.250695	0.045
8	F88	Alcohol	2	0.576949	0.16
9	F88	Alcohol	2	0.838843	0.276
10	F88	Alcohol	2	0.896412	0.499
11	F88	Alcohol	2	0.893839	0.687
12	F88	Alcohol	2	0.848812	0.855
13	F88	Alcohol	2	0.420458	1.1524
14	F88	Alcohol	3	0.25116	0.045
15	F88	Alcohol	3	0.787964	0.16
16	F88	Alcohol	3	0.866496	0.276
17	F88	Alcohol	3	0.952861	0.499
18	F88	Alcohol	3	0.894572	0.687
19	F88	Alcohol	3	0.823873	0.855
20	F88	Alcohol	3	0.791728	1.1524
21	F85	Water	1	0.102336	0.045
22	F85	Water	1	0.355021	0.16
23	F85	Water	1	0.684408	0.276
24	F85	Water	1	0.829773	0.499
25	F85	Water	1	0.881958	0.687
26	F85	Water	1	0.925191	0.855
27	F85	Water	1	0.849813	1.1524
28	F85	Water	2	0.153605	0.045
29	F85	Water	2	1.09955	0.16
30	F85	Water	2	1.69271	0.276
31	F85	Water	2	2.04417	0.499
32	F85	Water	2	2.22361	0.687
33	F85	Water	2	2.20785	0.855
34	F85	Water	2	2.21568	1.1524
42	F86	Alcohol	1	0.145569	0.045
43	F86	Alcohol	1	0.671082	0.16
44	F86	Alcohol	1	1.17747	0.276
45	F86	Alcohol	1	1.15499	0.499
46	F86	Alcohol	1	1.11043	0.687
47	F86	Alcohol	1	1.03434	0.855
48	F86	Alcohol	1	1.0143	1.1524
49	F86	Alcohol	2	0.10732	0.045
50	F86	Alcohol	2	0.346375	0.16
51	F86	Alcohol	2	0.674642	0.276
52	F86	Alcohol	2	0.912883	0.499
53	F86	Alcohol	2	0.879211	0.687
54	F86	Alcohol	2	0.736491	0.855
55	F86	Alcohol	2	0.803528	1.1524
56	F86	Alcohol	3	0.0194295	0.045
57	F86	Alcohol	3	0.273844	0.16
58	F86	Alcohol	3	0.444031	0.276
59	F86	Alcohol	3	0.620931	0.499
60	F86	Alcohol	3	0.597636	0.687
61	F86	Alcohol	3	0.638631	0.855
62	F86	Alcohol	3	0.585429	1.1524
63	F82	Water	1	0.166219	0.045
64	F82	Water	1	1.00006	0.16
65	F82	Water	1	1.31989	0.276
66	F82	Water	1	1.33982	0.499
67	F82	Water	1	1.26017	0.687
68	F82	Water	1	1.26027	0.855
69	F82	Water	1	1.17391	1.1524
70	F82	Water	2	0.114034	0.045
71	F82	Water	2	0.54891	0.16
72	F82	Water	2	0.971069	0.276
73	F82	Water	2	1.29822	0.499
74	F82	Water	2	1.39659	0.687
75	F82	Water	2	1.36353	0.855
76	F82	Water	2	1.33392	1.1524
77	F84	Water	1	0.226135	0.045
78	F84	Water	1	0.511169	0.16
79	F84	Water	1	0.625814	0.276
80	F84	Water	1	0.770671	0.499
81	F84	Water	1	0.803121	0.687
82	F84	Water	1	0.695394	0.855
83	F84	Water	1	0.695801	1.1524
84	F84	Water	2	0.346781	0.045
85	F84	Water	2	1.30595	0.16
86	F84	Water	2	2.17906	0.276
87	F84	Water	2	2.65249	0.499
88	F84	Water	2	2.60976	0.687
89	F84	Water	2	2.47294	0.855
90	F84	Water	2	2.45626	1.1524
91	F84	Water	3	0.230815	0.045
92	F84	Water	3	0.994364	0.16
93	F84	Water	3	1.53239	0.276
94	F84	Water	3	1.68274	0.499
95	F84	Water	3	1.6276	0.687
96	F84	Water	3	1.60126	0.855
97	F84	Water	3	1.47166	1.1524
231	F74	Water	1	0.076945	0.045
232	F74	Water	1	0.281677	0.16
233	F74	Water	1	0.405863	0.276
234	F74	Water	1	0.728332	0.499
235	F74	Water	1	0.826416	0.687
236	F74	Water	1	0.891479	0.855
237	F74	Water	1	0.905192	1.1524
238	F74	Water	2	0.225993	0.045
239	F74	Water	2	0.44869	0.16
240	F74	Water	2	0.557353	0.276
241	F74	Water	2	0.844198	0.499
242	F74	Water	2	1.00004	0.687
243	F74	Water	2	1.03001	0.855
244	F74	Water	2	1.13385	1.1524
245	F74	Water	3	0.160583	0.045
246	F74	Water	3	0.24939	0.16
247	F74	Water	3	0.258321	0.276
248	F74	Water	3	0.401042	0.499
249	F74	Water	3	0.372498	0.687
250	F74	Water	3	0.379476	0.855
251	F74	Water	3	0.380371	1.1524
252	G7	Water	1	0.189412	0.045
253	G7	Water	1	0.257833	0.16
254	G7	Water	1	0.35317	0.276
255	G7	Water	1	0.591512	0.499
256	G7	Water	1	0.759786	0.687
257	G7	Water	1	0.844116	0.855
258	G7	Water	1	0.990153	1.1524
259	G7	Water	2	0.383382	0.045
260	G7	Water	2	0.956462	0.16
261	G7	Water	2	1.03772	0.276
262	G7	Water	2	0.974243	0.499
263	G7	Water	2	0.93925	0.687
264	G7	Water	2	0.880107	0.855
265	G7	Water	2	0.787842	1.1524
266	G7	Water	3	0.455098	0.045
267	G7	Water	3	1.59249	0.16
268	G7	Water	3	1.57908	0.276
269	G7	Water	3	1.57062	0.499
270	G7	Water	3	1.56964	0.687
271	G7	Water	3	1.57444	0.855
272	G7	Water	3	1.52409	1.1524
273	G6	Alcohol	1	0.113403	0.045
274	G6	Alcohol	1	0.422078	0.16
275	G6	Alcohol	1	0.542867	0.276
276	G6	Alcohol	1	0.655924	0.499
277	G6	Alcohol	1	0.690898	0.687
278	G6	Alcohol	1	0.657491	0.855
279	G6	Alcohol	1	0.655782	1.1524
280	G6	Alcohol	2	0.0815837	0.045
281	G6	Alcohol	2	0.277974	0.16
282	G6	Alcohol	2	0.514242	0.276
283	G6	Alcohol	2	0.545512	0.499
284	G6	Alcohol	2	0.601807	0.687
285	G6	Alcohol	2	0.551147	0.855
286	G6	Alcohol	2	0.644958	1.1524
287	G6	Alcohol	3	0.253194	0.045
288	G6	Alcohol	3	1.2204	0.16
289	G6	Alcohol	3	1.35274	0.276
290	G6	Alcohol	3	1.39478	0.499
291	G6	Alcohol	3	1.41091	0.687
292	G6	Alcohol	3	1.39532	0.855
293	G6	Alcohol	3	1.35315	1.1524
294	G6	Alcohol	4	0.284688	0.045
295	G6	Alcohol	4	0.9587	0.16
296	G6	Alcohol	4	1.05076	0.276
297	G6	Alcohol	4	1.16813	0.499
298	G6	Alcohol	4	1.15525	0.687
299	G6	Alcohol	4	1.0942	0.855
300	G6	Alcohol	4	1.09035	1.1524
301	G8	Alcohol	1	0.64742	0.045
302	G8	Alcohol	1	1.20746	0.16
303	G8	Alcohol	1	1.23075	0.276
304	G8	Alcohol	1	1.23393	0.499
305	G8	Alcohol	1	1.24103	0.687
306	G8	Alcohol	1	1.23187	0.855
307	G8	Alcohol	1	1.22642	1.1524
308	G8	Alcohol	2	0.0744019	0.045
309	G8	Alcohol	2	0.344076	0.16
310	G8	Alcohol	2	0.29366	0.276
311	G8	Alcohol	2	0.563232	0.499
312	G8	Alcohol	2	0.531352	0.687
313	G8	Alcohol	2	0.504354	0.855
314	G8	Alcohol	2	0.471883	1.1524
315	G8	Alcohol	3	0.449422	0.045
316	G8	Alcohol	3	1.16734	0.16
317	G8	Alcohol	3	1.27148	0.276
318	G8	Alcohol	3	1.30398	0.499
319	G8	Alcohol	3	1.28737	0.687
320	G8	Alcohol	3	1.28192	0.855
321	G8	Alcohol	3	1.25391	1.1524
322	G8	Alcohol	4	0.0417684	0.045
323	G8	Alcohol	4	0.0883993	0.16
324	G8	Alcohol	4	0.332438	0.276
325	G8	Alcohol	4	0.411621	0.499
326	G8	Alcohol	4	0.539022	0.687
327	G8	Alcohol	4	0.568339	0.855
328	G8	Alcohol	4	0.595296	1.1524
329	G1	Water	1	0.226766	0.045
330	G1	Water	1	1.1995	0.16
331	G1	Water	1	1.27787	0.276
332	G1	Water	1	1.29016	0.499
333	G1	Water	1	1.28579	0.687
334	G1	Water	1	1.27008	0.855
335	G1	Water	1	1.23979	1.1524
336	G1	Water	2	0.448385	0.045
337	G1	Water	2	1.45862	0.16
338	G1	Water	2	1.47709	0.276
339	G1	Water	2	1.45288	0.499
340	G1	Water	2	1.44834	0.687
341	G1	Water	2	1.4161	0.855
342	G1	Water	2	1.44638	1.1524
343	G1	Water	3	0.672994	0.045
344	G1	Water	3	1.21029	0.16
345	G1	Water	3	1.4248	0.276
346	G1	Water	3	1.4092	0.499
347	G1	Water	3	1.40615	0.687
348	G1	Water	3	1.38566	0.855
349	G1	Water	3	1.36298	1.1524
