# Supplementary material for: The role of anterior insular cortex inputs to dorsolateral striatum in binge alcohol drinking
Source: eLife journal article supplement (doi:10.7554/elife.77411), 2022-07-28
Supplement: fig1-figsupp2-data1 [file Fig1-figure supplement2.xlsx]

## Sheet: Sheet1
	Grams per Kg	concentration
0	1.25238	0.0138412
1	3.25361	0.0184903
2	3.04633	0.0662684
3	2.30365	0.0288737
4	3.8332	0.0341929
6	3.97163	0.0670668
8	3.37553	0.0359316
9	3.89831	0.0445413
10	3.47826	0.0422004
11	2.92683	0.0351407
12	4.05797	0.0831347
13	4.21488	0.126424
14	3.64312	0.075842
15	4.84615	0.10065
16	4.40299	0.0846877
