# Supplementary material for: The role of anterior insular cortex inputs to dorsolateral striatum in binge alcohol drinking
Source: eLife journal article supplement (doi:10.7554/elife.77411), 2022-07-28
Supplement: fig1-figsupp3-data1 [file Fig1-figsupplement3.xlsx]

## Sheet: Sheet1
	Animal	Fluid	Slice	Frequency	Amplitude	Rise	Decay
0	F72	Alcohol	1	2.671	15.869	1.136	4.5
1	F72	Alcohol	2	1.707	12.817	0.896	3.683
2	F72	Alcohol	3	2.917	13.428	1.032	4.772
3	F72	Alcohol	4	1.753	14.038	1.008	4.336
4	F72	Alcohol	5	2.614	12.207	1.2	5.09
5	F72	Alcohol	6	2.74	17.7	1.004	4.081
6	F78	Alcohol	1	2.657	12.817	0.876	4.129
7	F78	Alcohol	2	1.97	16.479	1.092	4.96
8	F78	Alcohol	3	1.611	10.986	0.936	4.69
9	F78	Alcohol	4	2.815	14.648	0.904	4.024
10	F78	Alcohol	5	2.076	12.207	0.94	4.783
11	F75	Alcohol	1	1.329	11.597	0.923	4.204
12	F75	Alcohol	2	1.564	12.817	1.056	4.628
13	F75	Alcohol	3	1.787	17.09	1.308	5.163
14	F75	Alcohol	4	3.575	14.648	0.864	3.844
15	F75	Alcohol	5	2.3	10.986	0.846	4.569
16	F75	Alcohol	6	4.557	14.038	0.888	4.344
17	G6	Alcohol	1	0.234	12.076	1.5	7.347
18	G6	Alcohol	2	1.645	16.338	1.184	5.183
19	G6	Alcohol	3	0.529	13.652	1.096	7.647
20	G6	Alcohol	4	1.261	11.791	1.197	4.945
21	G8	Alcohol	1	0.621	11.857	1.224	8.232
22	G8	Alcohol	2	1.594	18.723	1.204	5.359
23	G8	Alcohol	3	2.504	15.231	1.028	5.122
24	G2	Alcohol	1	0.51	12.46	1.422	6.663
25	G2	Alcohol	2	0.73	12.137	1.804	7.463
26	G2	Alcohol	3	1.871	24.379	1.058	3.608
27	F80	Water	1	2.361	16.479	0.912	3.664
28	F80	Water	2	2.597	13.428	0.972	3.616
29	F80	Water	3	1.622	21.362	1.24	5.198
30	F80	Water	4	1.696	12.207	0.68	3.171
31	F80	Water	5	4.151	17.09	0.896	3.724
32	F80	Water	6	3.486	13.428	1.232	5.09
33	F80	Water	7	3.898	12.207	0.84	4.26
34	F80	Water	8	4.254	14.038	0.928	4.153
35	F73	Water	1	5.498	15.259	1.22	5.103
36	F73	Water	2	2.65	12.207	1.56	8.36
37	F73	Water	3	1.436	18.311	1.3	5.15
38	F73	Water	4	2.321	21.973	0.916	3.563
39	F73	Water	5	3.112	13.428	1.492	6.132
40	F73	Water	6	2.225	17.09	0.908	3.519
41	F73	Water	7	3.349	13.428	1.244	6.072
42	G7	Water	1	0.107	12.343	2.128	13.488
43	G7	Water	2	0.201	14.019	1.082	18.242
44	G7	Water	3	0.313	13.605	2.192	11.342
45	G7	Water	4	0.885	13.944	1.152	5.664
46	G1	Water	1	1.4	15.769	2.076	11.16
47	G1	Water	2	3.471	16.071	0.88	4.221
48	G1	Water	3	2.362	19.219	1.008	4.874
49	G1	Water	4	2.147	13.856	0.996	5.533
50	G1	Water	5	1.189	15.834	1.576	7.089
51	G5	Water	1	1.019	16.993	1.186	5.497
52	G5	Water	2	1.718	14.49	1.569	12.592
53	G5	Water	3	3.894	19.544	0.797	4.461
