# Supplementary material for: The role of anterior insular cortex inputs to dorsolateral striatum in binge alcohol drinking
Source: eLife journal article supplement (doi:10.7554/elife.77411), 2022-07-28
Supplement: fig1-figsupp4-data1 [file Fig1S4B.xlsx]

## Sheet: Sheet1
	Fluid	Session	Intake
1	Alcohol	1	0.517401
4	Alcohol	1	0.468552
6	Alcohol	1	0.309781
7	Alcohol	1	0.889677
10	Alcohol	2	0.431167
13	Alcohol	2	0.281131
15	Alcohol	2	0.929344
16	Alcohol	2	1.87821
22	Alcohol	3	0.196508
24	Alcohol	3	2.47825
25	Alcohol	3	2.23277
28	Alcohol	4	2.13314
31	Alcohol	4	0.393015
33	Alcohol	4	2.37499
34	Alcohol	4	2.42693
37	Alcohol	5	4.53235
40	Alcohol	5	2.44155
42	Alcohol	5	5.70985
43	Alcohol	5	5.73347
46	Alcohol	6	0.943549
49	Alcohol	6	2.49414
51	Alcohol	6	2.92015
52	Alcohol	6	2.67019
55	Alcohol	7	0.771995
58	Alcohol	7	3.45342
60	Alcohol	7	4.63197
61	Alcohol	7	3.52847
64	Alcohol	8	0.885895
67	Alcohol	8	2.43647
69	Alcohol	8	3.80279
70	Alcohol	8	3.54053
73	Alcohol	9	0.708716
76	Alcohol	9	3.27986
78	Alcohol	9	4.30315
79	Alcohol	9	3.35418
82	Alcohol	10	12.8455
85	Alcohol	10	6.46601
87	Alcohol	10	6.80499
88	Alcohol	10	6.80154
91	Alcohol	11	2.48754
94	Alcohol	11	2.29081
96	Alcohol	11	4.05297
97	Alcohol	11	3.31211
100	Alcohol	12	3.34531
103	Alcohol	12	3.43621
105	Alcohol	12	4.54724
106	Alcohol	12	2.52766
109	Alcohol	13	3.42622
112	Alcohol	13	2.83065
114	Alcohol	13	4.5507
115	Alcohol	13	5.11027
118	Alcohol	14	3.17552
121	Alcohol	14	2.83065
123	Alcohol	14	4.07667
124	Alcohol	14	4.58162
127	Alcohol	15	5.87996
130	Alcohol	15	6.18391
132	Alcohol	15	6.14934
133	Alcohol	15	7.12983
