# Supplementary material for: The role of anterior insular cortex inputs to dorsolateral striatum in binge alcohol drinking
Source: eLife journal article supplement (doi:10.7554/elife.77411), 2022-07-28
Supplement: fig1-figsupp4-data1 [file Fig1S4C.xlsx]

## Sheet: Sheet1
	Fluid	Session	Intake
0	Water	1	5.82011
2	Water	1	1.71429
5	Water	1	13.5135
8	Water	1	5.81395
9	Water	2	1.5873
11	Water	2	1.71429
14	Water	2	8.64865
17	Water	2	25
18	Water	3	0.558659
20	Water	3	1.11732
23	Water	3	4.25532
26	Water	3	34.6591
27	Water	4	46.3687
29	Water	4	2.23464
32	Water	4	34.0426
35	Water	4	55.6818
36	Water	5	83.0769
38	Water	5	2.27273
44	Water	5	76.4368
45	Water	6	31.0526
47	Water	6	2.76243
50	Water	6	18.6869
53	Water	6	29.8246
54	Water	7	28.9474
56	Water	7	44.7514
59	Water	7	30.8081
62	Water	7	36.2573
63	Water	8	25.3968
65	Water	8	53.6082
68	Water	8	31.4721
71	Water	8	41.573
72	Water	9	23.2804
74	Water	9	45.8763
77	Water	9	30.4569
80	Water	9	30.3371
81	Water	10	69.8413
83	Water	10	92.268
86	Water	10	75.1269
89	Water	10	70.7865
90	Water	11	31.8408
92	Water	11	43.5
95	Water	11	33.3333
98	Water	11	30.4813
99	Water	12	38.3085
101	Water	12	46.5
104	Water	12	34.3137
107	Water	12	37.4332
108	Water	13	31.8841
110	Water	13	50.5
113	Water	13	28.8462
116	Water	13	29.4737
117	Water	14	32.8502
119	Water	14	47.5
122	Water	14	31.7308
125	Water	14	35.7895
126	Water	15	62.9808
128	Water	15	102.463
131	Water	15	41.9811
134	Water	15	67.1875
