# Supplementary material for: The role of anterior insular cortex inputs to dorsolateral striatum in binge alcohol drinking
Source: eLife journal article supplement (doi:10.7554/elife.77411), 2022-07-28
Supplement: fig1-figsupp4-data1 [file Fig1S4D.xlsx]

## Sheet: Sheet1
	Animal	Fluid	Slice	Amplitude	Power
0	F3	Water	1	8.08553	0.05
1	F3	Water	1	22.6295	0.1
2	F3	Water	1	46.9015	0.15
3	F3	Water	1	55.2395	0.2
4	F3	Water	1	55.9046	0.25
5	F3	Water	1	186.583	1
6	F3	Water	2	12.0385	0.05
7	F3	Water	2	42.584	0.1
8	F3	Water	2	46.278	0.15
9	F3	Water	2	58.9208	0.2
10	F3	Water	2	97.5326	0.25
11	F3	Water	2	487.668	1
12	F3	Water	3	8.1414	0.05
13	F3	Water	3	21.0385	0.1
14	F3	Water	3	27.8683	0.15
15	F3	Water	3	38.6322	0.2
16	F3	Water	3	45.4614	0.25
17	F3	Water	3	115.493	1
18	F3	Water	4	12.6544	0.05
19	F3	Water	4	44.0125	0.1
20	F3	Water	4	78.6597	0.15
21	F3	Water	4	128.238	0.2
22	F3	Water	4	169.078	0.25
23	F3	Water	4	588.425	1
24	F7	Water	1	61.2793	0.05
25	F7	Water	1	147.207	0.1
26	F7	Water	1	187.871	0.15
27	F7	Water	1	225.99	0.2
28	F7	Water	1	265.613	0.25
29	F7	Water	1	602.463	1
30	F7	Water	2	6.57703	0.05
31	F7	Water	2	12.089	0.1
32	F7	Water	2	14.8469	0.15
33	F7	Water	2	15.9971	0.2
34	F7	Water	2	14.3851	0.25
35	F7	Water	2	34.3143	1
54	F11	Water	2	162.89	0.05
55	F11	Water	2	414.276	0.1
56	F11	Water	2	621.482	0.15
57	F11	Water	2	818.224	0.2
58	F11	Water	2	936.316	0.25
59	F11	Water	2	1894.54	1
60	F11	Water	3	61.9048	0.05
61	F11	Water	3	139.368	0.1
62	F11	Water	3	64.6234	0.15
63	F11	Water	3	261.805	0.2
64	F11	Water	3	304.01	0.25
65	F11	Water	3	378.447	1
66	F11	Water	4	45.6975	0.05
67	F11	Water	4	104.247	0.1
68	F11	Water	4	254.385	0.15
69	F11	Water	4	315.936	0.2
70	F11	Water	4	430.241	0.25
71	F11	Water	4	834.245	1
72	F1	Water	1	73.9126	0.05
73	F1	Water	1	167.449	0.1
74	F1	Water	1	232.321	0.15
75	F1	Water	1	329.464	0.2
76	F1	Water	1	484.326	0.25
77	F1	Water	1	600.981	1
84	F1	Water	3	4.77083	0.05
85	F1	Water	3	146.837	0.1
86	F1	Water	3	172.379	0.15
87	F1	Water	3	243.087	0.2
88	F1	Water	3	273.504	0.25
89	F1	Water	3	528.527	1
96	F8	Alcohol	1	75.9867	0.05
97	F8	Alcohol	1	345.061	0.1
98	F8	Alcohol	1	432.249	0.15
99	F8	Alcohol	1	472.66	0.2
100	F8	Alcohol	1	536.005	0.25
101	F8	Alcohol	1	643.478	1
102	F8	Alcohol	2	45.5434	0.05
103	F8	Alcohol	2	107.272	0.1
104	F8	Alcohol	2	152.114	0.15
105	F8	Alcohol	2	191.736	0.2
106	F8	Alcohol	2	337.097	0.25
107	F8	Alcohol	2	525.57	1
108	F8	Alcohol	3	46.7964	0.05
109	F8	Alcohol	3	180.299	0.1
110	F8	Alcohol	3	269.353	0.15
111	F8	Alcohol	3	315.15	0.2
112	F8	Alcohol	3	345.016	0.25
113	F8	Alcohol	3	425.254	1
120	F8	Alcohol	5	231.536	0.05
121	F8	Alcohol	5	494.986	0.1
122	F8	Alcohol	5	675.253	0.15
123	F8	Alcohol	5	858.397	0.2
124	F8	Alcohol	5	975.384	0.25
125	F8	Alcohol	5	1660.73	1
126	F8	Alcohol	6	56.4446	0.05
127	F8	Alcohol	6	540.248	0.1
128	F8	Alcohol	6	937.388	0.15
129	F8	Alcohol	6	1258.83	0.2
130	F8	Alcohol	6	1460.97	0.25
131	F8	Alcohol	6	2430.56	1
132	F10	Alcohol	1	5.321	0.05
133	F10	Alcohol	1	3.06747	0.1
134	F10	Alcohol	1	134.907	0.15
135	F10	Alcohol	1	248.382	0.2
136	F10	Alcohol	1	319.443	0.25
137	F10	Alcohol	1	457.384	1
138	F10	Alcohol	2	6.9807	0.05
139	F10	Alcohol	2	104.034	0.1
140	F10	Alcohol	2	182.355	0.15
141	F10	Alcohol	2	193.827	0.2
142	F10	Alcohol	2	192.652	0.25
143	F10	Alcohol	2	296.417	1
144	F10	Alcohol	3	96.3952	0.05
145	F10	Alcohol	3	239.455	0.1
146	F10	Alcohol	3	376.336	0.15
147	F10	Alcohol	3	444.545	0.2
148	F10	Alcohol	3	488.842	0.25
149	F10	Alcohol	3	554.857	1
150	F10	Alcohol	4	6.3565	0.05
151	F10	Alcohol	4	46.5449	0.1
152	F10	Alcohol	4	78.9804	0.15
153	F10	Alcohol	4	125.287	0.2
154	F10	Alcohol	4	175.299	0.25
155	F10	Alcohol	4	381.794	1
168	F2	Alcohol	3	4.7893	0.05
169	F2	Alcohol	3	40.8946	0.1
170	F2	Alcohol	3	138.296	0.15
171	F2	Alcohol	3	177.654	0.2
172	F2	Alcohol	3	202.107	0.25
173	F2	Alcohol	3	503.083	1
174	F2	Alcohol	4	40.431	0.05
175	F2	Alcohol	4	27.9984	0.1
176	F2	Alcohol	4	32.305	0.15
177	F2	Alcohol	4	36.5356	0.2
178	F2	Alcohol	4	34.501	0.25
179	F2	Alcohol	4	52.7366	1
186	F6	Alcohol	2	87.965	0.05
187	F6	Alcohol	2	179.087	0.1
188	F6	Alcohol	2	225.436	0.15
189	F6	Alcohol	2	276.063	0.2
190	F6	Alcohol	2	345.432	0.25
191	F6	Alcohol	2	606.23	1
192	F6	Alcohol	3	34.323	0.05
193	F6	Alcohol	3	41.9509	0.1
194	F6	Alcohol	3	217.156	0.15
195	F6	Alcohol	3	309.01	0.2
196	F6	Alcohol	3	321.719	0.25
197	F6	Alcohol	3	795.816	1
198	F6	Alcohol	4	61.9382	0.05
199	F6	Alcohol	4	142.708	0.1
200	F6	Alcohol	4	208.027	0.15
201	F6	Alcohol	4	192.644	0.2
202	F6	Alcohol	4	225.339	0.25
203	F6	Alcohol	4	419.117	1
204	F6	Alcohol	5	27.1347	0.05
205	F6	Alcohol	5	50.0833	0.1
206	F6	Alcohol	5	61.3702	0.15
207	F6	Alcohol	5	95.8154	0.2
208	F6	Alcohol	5	103.67	0.25
209	F6	Alcohol	5	404.832	1
210	F6	Alcohol	6	7.92467	0.05
211	F6	Alcohol	6	10.7255	0.1
212	F6	Alcohol	6	12.9514	0.15
213	F6	Alcohol	6	33.8348	0.2
214	F6	Alcohol	6	41.6788	0.25
215	F6	Alcohol	6	188.49	1
