# Supplementary material for: The role of anterior insular cortex inputs to dorsolateral striatum in binge alcohol drinking
Source: eLife journal article supplement (doi:10.7554/elife.77411), 2022-07-28
Supplement: fig1-figsupp4-data1 [file Fig1S4E.xlsx]

## Sheet: Sheet1
	Animal	Fluid	Slice	Ratio
0	F8	Alcohol	1	3.7924
1	F8	Alcohol	2	2.8015
2	F8	Alcohol	3	2.9588
3	F8	Alcohol	4	15.666
4	F8	Alcohol	5	7.6147
5	F8	Alcohol	6	13.246
6	F10	Alcohol	1	7.5063
7	F10	Alcohol	2	1.751
8	F10	Alcohol	3	5.48032
9	F10	Alcohol	4	3.0582
10	F2	Alcohol	1	10.802
11	F2	Alcohol	2	16.954
12	F2	Alcohol	3	15.383
13	F6	Alcohol	1	12.112
14	F6	Alcohol	2	9.1883
15	F6	Alcohol	3	10.049
16	F6	Alcohol	4	5.1881
17	F6	Alcohol	5	10.77
18	F3	Water	1	2.77352
19	F3	Water	2	5.04004
20	F3	Water	3	1.68932
21	F3	Water	4	7.20461
22	F7	Water	1	2.2173
23	F7	Water	2	1.18978
24	F11	Water	1	9.05838
25	F11	Water	2	6.37599
26	F11	Water	3	4.61755
27	F11	Water	4	10.8108
28	F1	Water	1	7.66971
29	F1	Water	2	8.54304
30	F1	Water	3	16.0865
31	F1	Water	4	11.9944
