# Supplementary material for: The role of anterior insular cortex inputs to dorsolateral striatum in binge alcohol drinking
Source: eLife journal article supplement (doi:10.7554/elife.77411), 2022-07-28
Supplement: fig1-figsupp4-data1 [file Fig1S4F.xlsx]

## Sheet: Sheet1
	Animal	Fluid	Slice	oPPR	Interval
1	F8	Alcohol	1	0.126642	50
2	F8	Alcohol	1	0.280861	75
3	F8	Alcohol	1	0.668543	100
4	F8	Alcohol	1	0.446507	125
5	F8	Alcohol	1	0.37264	150
6	F8	Alcohol	1	0.532167	175
7	F8	Alcohol	1	0.428072	200
9	F8	Alcohol	2	0.951548	50
10	F8	Alcohol	2	0.967407	75
11	F8	Alcohol	2	1.42196	100
12	F8	Alcohol	2	0.984827	125
13	F8	Alcohol	2	0.897439	150
14	F8	Alcohol	2	0.577481	175
15	F8	Alcohol	2	0.591545	200
17	F8	Alcohol	3	1.27778	50
18	F8	Alcohol	3	1.60226	75
19	F8	Alcohol	3	1.30644	100
20	F8	Alcohol	3	1.18414	125
21	F8	Alcohol	3	1.25013	150
22	F8	Alcohol	3	2.27273	175
23	F8	Alcohol	3	2.26451	200
25	F8	Alcohol	4	0.784953	50
26	F8	Alcohol	4	1.07252	75
27	F8	Alcohol	4	1.30968	100
28	F8	Alcohol	4	1.17397	125
29	F8	Alcohol	4	0.905684	150
30	F8	Alcohol	4	1.11889	175
31	F8	Alcohol	4	1.27552	200
33	F8	Alcohol	5	0.603407	50
34	F8	Alcohol	5	0.960376	75
35	F8	Alcohol	5	1.0541	100
36	F8	Alcohol	5	0.594235	125
37	F8	Alcohol	5	0.764729	150
38	F8	Alcohol	5	0.775426	175
39	F8	Alcohol	5	0.566508	200
41	F10	Alcohol	1	0.139553	50
42	F10	Alcohol	1	0.137078	75
43	F10	Alcohol	1	0.545967	100
44	F10	Alcohol	1	0.552597	125
45	F10	Alcohol	1	0.779313	150
46	F10	Alcohol	1	1.09392	175
47	F10	Alcohol	1	0.898438	200
49	F10	Alcohol	2	0.132566	50
50	F10	Alcohol	2	0.0980762	75
51	F10	Alcohol	2	0.1198	100
52	F10	Alcohol	2	0.172053	125
53	F10	Alcohol	2	0.27735	150
54	F10	Alcohol	2	0.239958	175
55	F10	Alcohol	2	0.309184	200
57	F10	Alcohol	3	0.116342	50
58	F10	Alcohol	3	0.421857	75
59	F10	Alcohol	3	0.695849	100
60	F10	Alcohol	3	1.07302	125
61	F10	Alcohol	3	1.26715	150
62	F10	Alcohol	3	1.1233	175
63	F10	Alcohol	3	1.22198	200
65	F10	Alcohol	4	0.270657	50
66	F10	Alcohol	4	0.436772	75
67	F10	Alcohol	4	0.607524	100
68	F10	Alcohol	4	0.639107	125
69	F10	Alcohol	4	0.613706	150
70	F10	Alcohol	4	0.773887	175
71	F10	Alcohol	4	0.818997	200
73	F2	Alcohol	1	0.304074	50
74	F2	Alcohol	1	0.719781	75
75	F2	Alcohol	1	1.09446	100
76	F2	Alcohol	1	0.998465	125
77	F2	Alcohol	1	0.951227	150
78	F2	Alcohol	1	1.02459	175
79	F2	Alcohol	1	0.795471	200
81	F2	Alcohol	2	0.988358	50
82	F2	Alcohol	2	1.04083	75
83	F2	Alcohol	2	1.39679	100
84	F2	Alcohol	2	1.65543	125
85	F2	Alcohol	2	1.23853	150
86	F2	Alcohol	2	1.64987	175
87	F2	Alcohol	2	1.34812	200
89	F2	Alcohol	3	0.23108	50
90	F2	Alcohol	3	0.486732	75
91	F2	Alcohol	3	0.721664	100
92	F2	Alcohol	3	0.639204	125
93	F2	Alcohol	3	0.673449	150
94	F2	Alcohol	3	0.572089	175
95	F2	Alcohol	3	0.570755	200
97	F6	Alcohol	1	0.301184	50
98	F6	Alcohol	1	0.994923	75
99	F6	Alcohol	1	1.20887	100
100	F6	Alcohol	1	1.42191	125
101	F6	Alcohol	1	1.30292	150
102	F6	Alcohol	1	0.831995	175
103	F6	Alcohol	1	0.904197	200
105	F6	Alcohol	2	0.503218	50
106	F6	Alcohol	2	0.930826	75
107	F6	Alcohol	2	1.36162	100
108	F6	Alcohol	2	1.21586	125
109	F6	Alcohol	2	0.867836	150
110	F6	Alcohol	2	1.12856	175
111	F6	Alcohol	2	1.05998	200
113	F6	Alcohol	3	1.29775	50
114	F6	Alcohol	3	1.39065	75
115	F6	Alcohol	3	1.53369	100
116	F6	Alcohol	3	0.906646	125
117	F6	Alcohol	3	1.24422	150
118	F6	Alcohol	3	1.18916	175
119	F6	Alcohol	3	1.08357	200
121	F6	Alcohol	4	0.207391	50
122	F6	Alcohol	4	0.442522	75
123	F6	Alcohol	4	0.603568	100
124	F6	Alcohol	4	0.72078	125
125	F6	Alcohol	4	0.64858	150
126	F6	Alcohol	4	0.478535	175
127	F6	Alcohol	4	0.778732	200
129	F6	Alcohol	5	0.529693	50
130	F6	Alcohol	5	0.249621	75
131	F6	Alcohol	5	0.265957	100
132	F6	Alcohol	5	0.391271	125
133	F6	Alcohol	5	0.199042	150
134	F6	Alcohol	5	0.104756	175
135	F6	Alcohol	5	0.3315	200
137	F3	Water	1	0.908768	50
138	F3	Water	1	0.87763	75
139	F3	Water	1	1.25249	100
140	F3	Water	1	1.0249	125
141	F3	Water	1	0.89315	150
142	F3	Water	1	0.989953	175
143	F3	Water	1	0.632753	200
145	F3	Water	2	0.719041	50
146	F3	Water	2	1.3036	75
147	F3	Water	2	1.71052	100
148	F3	Water	2	1.49234	125
149	F3	Water	2	1.53147	150
150	F3	Water	2	1.61647	175
151	F3	Water	2	1.33946	200
153	F3	Water	3	0.449838	50
154	F3	Water	3	1.15581	75
155	F3	Water	3	1.24856	100
156	F3	Water	3	1.86142	125
157	F3	Water	3	1.50152	150
158	F3	Water	3	1.02988	175
159	F3	Water	3	0.864141	200
161	F7	Water	1	0.416295	50
162	F7	Water	1	1.19472	75
163	F7	Water	1	1.1671	100
164	F7	Water	1	1.35652	125
165	F7	Water	1	0.960627	150
166	F7	Water	1	1.14593	175
167	F7	Water	1	1.21149	200
169	F7	Water	2	0.23541	50
170	F7	Water	2	0.73524	75
171	F7	Water	2	0.714851	100
172	F7	Water	2	0.924797	125
173	F7	Water	2	1.06435	150
174	F7	Water	2	0.71025	175
175	F7	Water	2	0.840065	200
177	F7	Water	3	0.496345	50
178	F7	Water	3	0.783788	75
179	F7	Water	3	0.664408	100
180	F7	Water	3	0.734511	125
181	F7	Water	3	0.801629	150
182	F7	Water	3	0.694046	175
183	F7	Water	3	1	200
185	F11	Water	1	0.300791	50
186	F11	Water	1	0.297645	75
187	F11	Water	1	0.291867	100
188	F11	Water	1	0.358076	125
189	F11	Water	1	0.194523	150
190	F11	Water	1	0.243522	175
191	F11	Water	1	0.38077	200
193	F11	Water	2	0.214455	50
194	F11	Water	2	0.403254	75
195	F11	Water	2	0.630508	100
196	F11	Water	2	0.875946	125
197	F11	Water	2	1.03292	150
198	F11	Water	2	0.742994	175
199	F11	Water	2	0.870571	200
201	F11	Water	3	1.01266	50
202	F11	Water	3	1.64336	75
203	F11	Water	3	1.32887	100
204	F11	Water	3	1.36353	125
205	F11	Water	3	0.878145	150
206	F11	Water	3	1.3579	175
207	F11	Water	3	1.3526	200
209	F1	Water	1	0.0522926	50
210	F1	Water	1	0.700692	75
211	F1	Water	1	0.809245	100
212	F1	Water	1	1.02302	125
213	F1	Water	1	1.1486	150
214	F1	Water	1	1.3584	175
215	F1	Water	1	3.08756	200
217	F1	Water	2	0.0757314	50
218	F1	Water	2	0.157981	75
219	F1	Water	2	0.350139	100
220	F1	Water	2	0.583931	125
221	F1	Water	2	0.601907	150
222	F1	Water	2	0.386228	175
223	F1	Water	2	0.398395	200
225	F1	Water	3	0.0796529	50
226	F1	Water	3	0.407323	75
227	F1	Water	3	0.799909	100
228	F1	Water	3	0.578219	125
229	F1	Water	3	0.291233	150
230	F1	Water	3	0.435554	175
231	F1	Water	3	0.371509	200
