# Supplementary material for: The role of anterior insular cortex inputs to dorsolateral striatum in binge alcohol drinking
Source: eLife journal article supplement (doi:10.7554/elife.77411), 2022-07-28
Supplement: fig1-figsupp5-data1 [file Fig1S5C.xlsx]

## Sheet: Sheet1
	Final Session	Fluid	Intake
52	Final Session	Alcohol	2.07845
55	Final Session	Alcohol	2.79057
59	Final Session	Alcohol	3.0178
67	Final Session	Alcohol	1.0954
68	Final Session	Alcohol	2.74778
