# Supplementary material for: The role of anterior insular cortex inputs to dorsolateral striatum in binge alcohol drinking
Source: eLife journal article supplement (doi:10.7554/elife.77411), 2022-07-28
Supplement: fig1-figsupp5-data1 [file Fig1S5D.xlsx]

## Sheet: Sheet1
	Final Session	Fluid	Intake
34	Final Session	Water	27.5109
36	Final Session	Water	29.2237
61	Final Session	Water	24.2798
65	Final Session	Water	30.6034
69	Final Session	Water	20.332
