# Supplementary material for: The role of anterior insular cortex inputs to dorsolateral striatum in binge alcohol drinking
Source: eLife journal article supplement (doi:10.7554/elife.77411), 2022-07-28
Supplement: fig1-figsupp5-data1 [file Fig1S5E.xlsx]

## Sheet: Sheet1
	Animal	Fluid	Slice	Amplitude	Power
0	S5	Water	1	7.9062	0.05
1	S5	Water	1	11.4979	0.1
2	S5	Water	1	19.6925	0.15
3	S5	Water	1	14.0107	0.2
4	S5	Water	1	34.3873	0.25
5	S5	Water	1	58.9945	1
6	S5	Water	2	21.2794	0.05
7	S5	Water	2	35.5998	0.1
8	S5	Water	2	46.3289	0.15
9	S5	Water	2	62.384	0.2
10	S5	Water	2	89.7935	0.25
11	S5	Water	2	225.375	1
12	S5	Water	3	6.46363	0.05
13	S5	Water	3	16.5459	0.1
14	S5	Water	3	14.9064	0.15
15	S5	Water	3	73.1949	0.2
16	S5	Water	3	94.8717	0.25
17	S5	Water	3	191.876	1
18	S7	Water	1	6.93667	0.05
19	S7	Water	1	22.7686	0.1
20	S7	Water	1	104.836	0.15
21	S7	Water	1	131.642	0.2
22	S7	Water	1	117.382	0.25
23	S7	Water	1	225.171	1
24	S7	Water	2	8.1486	0.05
25	S7	Water	2	63.9622	0.1
26	S7	Water	2	55.5151	0.15
27	S7	Water	2	95.4363	0.2
28	S7	Water	2	136.416	0.25
29	S7	Water	2	353.731	1
30	S7	Water	3	6.72823	0.05
31	S7	Water	3	21.1128	0.1
32	S7	Water	3	30.5056	0.15
33	S7	Water	3	56.4327	0.2
34	S7	Water	3	98.7916	0.25
35	S7	Water	3	117.115	1
36	S6	Water	1	108.208	0.05
37	S6	Water	1	589.791	0.1
38	S6	Water	1	1143.88	0.15
39	S6	Water	1	1234.51	0.2
40	S6	Water	1	1389.76	0.25
41	S6	Water	1	2394.88	1
42	S6	Water	2	146.172	0.05
43	S6	Water	2	626.308	0.1
44	S6	Water	2	955.432	0.15
45	S6	Water	2	1134.03	0.2
46	S6	Water	2	1242.45	0.25
47	S6	Water	2	2191	1
48	S6	Water	3	12.2321	0.05
49	S6	Water	3	304.885	0.1
50	S6	Water	3	669.95	0.15
51	S6	Water	3	823.337	0.2
52	S6	Water	3	871.774	0.25
53	S6	Water	3	1587.89	1
54	S4	Water	1	363.82	0.05
55	S4	Water	1	506.553	0.1
56	S4	Water	1	518.21	0.15
57	S4	Water	1	539.371	0.2
58	S4	Water	1	568.62	0.25
59	S4	Water	1	795.315	1
60	S4	Water	2	165.426	0.05
61	S4	Water	2	216.797	0.1
62	S4	Water	2	246.978	0.15
63	S4	Water	2	323.177	0.2
64	S4	Water	2	313.386	0.25
65	S4	Water	2	472.244	1
66	S9	Water	1	78.5182	0.05
67	S9	Water	1	224.881	0.1
68	S9	Water	1	401.887	0.15
69	S9	Water	1	588.408	0.2
70	S9	Water	1	640.452	0.25
71	S9	Water	1	935.315	1
72	S9	Water	2	17.1409	0.05
73	S9	Water	2	269.534	0.1
74	S9	Water	2	489.749	0.15
75	S9	Water	2	748.461	0.2
76	S9	Water	2	876.444	0.25
77	S9	Water	2	1860.29	1
78	S9	Water	3	62.3498	0.05
79	S9	Water	3	365.877	0.1
80	S9	Water	3	522.45	0.15
81	S9	Water	3	523.632	0.2
82	S9	Water	3	664.788	0.25
83	S9	Water	3	1344.5	1
84	S3	Alcohol	1	11.9475	0.05
85	S3	Alcohol	1	94.341	0.1
86	S3	Alcohol	1	175.939	0.15
87	S3	Alcohol	1	278.066	0.2
88	S3	Alcohol	1	318.658	0.25
89	S3	Alcohol	1	477.745	1
90	S3	Alcohol	2	24.2163	0.05
91	S3	Alcohol	2	175.735	0.1
92	S3	Alcohol	2	447.231	0.15
93	S3	Alcohol	2	577.163	0.2
94	S3	Alcohol	2	566.132	0.25
95	S3	Alcohol	2	2170.25	1
96	S3	Alcohol	3	19.0189	0.05
97	S3	Alcohol	3	117.24	0.1
98	S3	Alcohol	3	168.103	0.15
99	S3	Alcohol	3	273.187	0.2
100	S3	Alcohol	3	466.559	0.25
101	S3	Alcohol	3	1133.38	1
102	S8	Alcohol	1	84.1384	0.05
103	S8	Alcohol	1	479.475	0.1
104	S8	Alcohol	1	903.08	0.15
105	S8	Alcohol	1	1183.94	0.2
106	S8	Alcohol	1	1460.06	0.25
107	S8	Alcohol	1	2088.46	1
108	S8	Alcohol	2	38.1149	0.05
109	S8	Alcohol	2	934.401	0.1
110	S8	Alcohol	2	1813.16	0.15
111	S8	Alcohol	2	2252.56	0.2
112	S8	Alcohol	2	2448.23	0.25
113	S8	Alcohol	2	3998.94	1
114	S8	Alcohol	3	20.8854	0.05
115	S8	Alcohol	3	480.686	0.1
116	S8	Alcohol	3	939.22	0.15
117	S8	Alcohol	3	1302.41	0.2
118	S8	Alcohol	3	1733.83	0.25
119	S8	Alcohol	3	3158.56	1
120	S2	Alcohol	1	33.4519	0.05
121	S2	Alcohol	1	510.999	0.1
122	S2	Alcohol	1	1016.43	0.15
123	S2	Alcohol	1	1220.88	0.2
124	S2	Alcohol	1	1455.33	0.25
125	S2	Alcohol	1	2894.87	1
126	S2	Alcohol	2	34.2794	0.05
127	S2	Alcohol	2	446.186	0.1
128	S2	Alcohol	2	772.918	0.15
129	S2	Alcohol	2	1105.43	0.2
130	S2	Alcohol	2	1333.16	0.25
131	S2	Alcohol	2	2433.56	1
132	S2	Alcohol	3	69.0806	0.05
133	S2	Alcohol	3	722.088	0.1
134	S2	Alcohol	3	911.704	0.15
135	S2	Alcohol	3	1282.31	0.2
136	S2	Alcohol	3	1483.45	0.25
137	S2	Alcohol	3	2575.76	1
138	S10	Alcohol	1	75.2812	0.05
139	S10	Alcohol	1	746.173	0.1
140	S10	Alcohol	1	1073.87	0.15
141	S10	Alcohol	1	1267.96	0.2
142	S10	Alcohol	1	1405.67	0.25
143	S10	Alcohol	1	2459.36	1
144	S10	Alcohol	2	96.8152	0.05
145	S10	Alcohol	2	408.866	0.1
146	S10	Alcohol	2	725.586	0.15
147	S10	Alcohol	2	714.638	0.2
148	S10	Alcohol	2	926.339	0.25
149	S10	Alcohol	2	1814.7	1
150	S10	Alcohol	3	65.407	0.05
151	S10	Alcohol	3	192.677	0.1
152	S10	Alcohol	3	372.008	0.15
153	S10	Alcohol	3	691.859	0.2
154	S10	Alcohol	3	823.858	0.25
155	S10	Alcohol	3	1476.08	1
156	S1	Alcohol	1	10.7408	0.05
157	S1	Alcohol	1	64.4163	0.1
158	S1	Alcohol	1	97.947	0.15
159	S1	Alcohol	1	180.434	0.2
160	S1	Alcohol	1	223.635	0.25
161	S1	Alcohol	1	523.972	1
162	S1	Alcohol	2	8.26523	0.05
163	S1	Alcohol	2	14.9609	0.1
164	S1	Alcohol	2	48.3393	0.15
165	S1	Alcohol	2	95.1491	0.2
166	S1	Alcohol	2	120.885	0.25
167	S1	Alcohol	2	227.466	1
168	S1	Alcohol	3	164.422	0.05
169	S1	Alcohol	3	416.744	0.1
170	S1	Alcohol	3	545.745	0.15
171	S1	Alcohol	3	662.737	0.2
172	S1	Alcohol	3	690.382	0.25
173	S1	Alcohol	3	1296.89	1
