# Supplementary material for: The role of anterior insular cortex inputs to dorsolateral striatum in binge alcohol drinking
Source: eLife journal article supplement (doi:10.7554/elife.77411), 2022-07-28
Supplement: fig1-figsupp5-data1 [file Fig1S5F.xlsx]

## Sheet: Sheet1
	Animal	Fluid	Slice	Ratio
0	S3	Alcohol	1	12.075
2	S3	Alcohol	3	10.092
3	S3	Alcohol	4	13.585
4	S3	Alcohol	5	1.8599
5	S8	Alcohol	1	6.1105
6	S8	Alcohol	2	13.494
7	S8	Alcohol	3	9.0386
8	S8	Alcohol	4	12.019
9	S8	Alcohol	5	24.9477
10	S2	Alcohol	1	7.346
11	S2	Alcohol	2	7.7901
12	S2	Alcohol	3	12.354
13	S2	Alcohol	4	6.2439
14	S2	Alcohol	5	3.0884
15	S2	Alcohol	6	6.1156
16	S10	Alcohol	1	4.8199
17	S10	Alcohol	2	5.9702
19	S10	Alcohol	4	11.929
20	S1	Alcohol	1	10.198
21	S1	Alcohol	2	3.3983
22	S1	Alcohol	3	7.699
23	S1	Alcohol	4	10.9526
25	S5	Water	1	3.3368
26	S5	Water	2	8.95271
27	S5	Water	3	8.27184
28	S5	Water	4	7.63215
29	S5	Water	5	10.3833
30	S7	Water	1	7.3212
31	S7	Water	2	22.6935
32	S7	Water	3	21.6805
33	S7	Water	4	1.72978
34	S7	Water	5	2.88134
35	S7	Water	6	1.68793
36	S6	Water	1	20.0452
37	S6	Water	2	9.57685
38	S6	Water	3	11.5701
39	S6	Water	4	9.22664
40	S6	Water	5	7.72504
41	S4	Water	1	14.8866
42	S4	Water	2	5.38435
43	S4	Water	3	1.63947
44	S4	Water	4	5.51889
45	S4	Water	5	6.49815
46	S9	Water	1	8.28844
47	S9	Water	2	9.29203
48	S9	Water	3	6.17064
49	S9	Water	4	5.98819
50	S9	Water	5	6.4428
