# Supplementary material for: The role of anterior insular cortex inputs to dorsolateral striatum in binge alcohol drinking
Source: eLife journal article supplement (doi:10.7554/elife.77411), 2022-07-28
Supplement: fig1-figsupp5-data1 [file Fig1S5G.xlsx]

## Sheet: Sheet1
	Animal	Fluid	Slice	Amplitude	Power
0	S5	Water	1	0.22939	0.045
1	S5	Water	1	1.0822	0.16
2	S5	Water	1	1.48183	0.276
3	S5	Water	1	1.80171	0.499
4	S5	Water	1	1.83009	0.687
5	S5	Water	1	1.82988	0.855
6	S5	Water	1	1.83533	1.1524
7	S5	Water	2	0.199839	0.045
8	S5	Water	2	1.16557	0.16
9	S5	Water	2	1.69764	0.276
10	S5	Water	2	1.91655	0.499
11	S5	Water	2	1.91284	0.687
12	S5	Water	2	1.88517	0.855
13	S5	Water	2	1.92027	1.1524
14	S7	Water	1	0.303904	0.045
15	S7	Water	1	0.802409	0.16
16	S7	Water	1	1.0082	0.276
17	S7	Water	1	1.17788	0.499
18	S7	Water	1	1.19191	0.687
19	S7	Water	1	1.16252	0.855
20	S7	Water	1	1.08871	1.1524
21	S7	Water	2	0.48111	0.045
22	S7	Water	2	1.53824	0.16
23	S7	Water	2	1.76371	0.276
24	S7	Water	2	1.90704	0.499
25	S7	Water	2	1.95048	0.687
26	S7	Water	2	1.95424	0.855
27	S7	Water	2	1.90531	1.1524
28	S3	Alcohol	1	0.443522	0.045
29	S3	Alcohol	1	1.64759	0.16
30	S3	Alcohol	1	1.90857	0.276
31	S3	Alcohol	1	2.00745	0.499
32	S3	Alcohol	1	2.05648	0.687
33	S3	Alcohol	1	2.08008	0.855
34	S3	Alcohol	1	2.0078	1.1524
35	S3	Alcohol	2	0.921936	0.045
36	S3	Alcohol	2	1.19771	0.16
37	S3	Alcohol	2	1.23835	0.276
38	S3	Alcohol	2	1.34633	0.499
39	S3	Alcohol	2	1.34852	0.687
40	S3	Alcohol	2	1.3295	0.855
41	S3	Alcohol	2	1.34415	1.1524
42	S3	Alcohol	3	0.843811	0.045
43	S3	Alcohol	3	1.75954	0.16
44	S3	Alcohol	3	1.99326	0.276
45	S3	Alcohol	3	2.10464	0.499
46	S3	Alcohol	3	2.13674	0.687
47	S3	Alcohol	3	2.14773	0.855
48	S3	Alcohol	3	2.14925	1.1524
49	S8	Alcohol	1	0.620015	0.045
50	S8	Alcohol	1	1.315	0.16
51	S8	Alcohol	1	1.41469	0.276
52	S8	Alcohol	1	1.4679	0.499
53	S8	Alcohol	1	1.50391	0.687
54	S8	Alcohol	1	1.49806	0.855
55	S8	Alcohol	1	1.48616	1.1524
56	S8	Alcohol	2	0.766042	0.045
57	S8	Alcohol	2	1.37889	0.16
58	S8	Alcohol	2	1.48707	0.276
59	S8	Alcohol	2	1.56469	0.499
60	S8	Alcohol	2	1.57043	0.687
61	S8	Alcohol	2	1.58	0.855
62	S8	Alcohol	2	1.57196	1.1524
63	S8	Alcohol	3	1.00149	0.045
64	S8	Alcohol	3	1.89824	0.16
65	S8	Alcohol	3	2.02667	0.276
66	S8	Alcohol	3	2.08054	0.499
67	S8	Alcohol	3	2.06935	0.687
68	S8	Alcohol	3	2.06451	0.855
69	S8	Alcohol	3	2.06238	1.1524
70	S2	Alcohol	1	1.26623	0.045
71	S2	Alcohol	1	2.33795	0.16
72	S2	Alcohol	1	2.48479	0.276
73	S2	Alcohol	1	2.55356	0.499
74	S2	Alcohol	1	2.58769	0.687
75	S2	Alcohol	1	2.61785	0.855
76	S2	Alcohol	1	2.60849	1.1524
77	S2	Alcohol	2	0.611623	0.045
78	S2	Alcohol	2	1.24781	0.16
79	S2	Alcohol	2	1.43239	0.276
80	S2	Alcohol	2	1.6127	0.499
81	S2	Alcohol	2	1.62542	0.687
82	S2	Alcohol	2	1.62689	0.855
83	S2	Alcohol	2	1.61865	1.1524
84	S2	Alcohol	3	0.241496	0.045
85	S2	Alcohol	3	0.93221	0.16
86	S2	Alcohol	3	1.23159	0.276
87	S2	Alcohol	3	1.44338	0.499
88	S2	Alcohol	3	1.49796	0.687
89	S2	Alcohol	3	1.54083	0.855
90	S2	Alcohol	3	1.58656	1.1524
91	S6	Water	1	0.485586	0.045
92	S6	Water	1	0.765686	0.16
93	S6	Water	1	0.850983	0.276
94	S6	Water	1	0.880636	0.499
95	S6	Water	1	0.875651	0.687
96	S6	Water	1	0.865224	0.855
97	S6	Water	1	0.832062	1.1524
98	S6	Water	2	0.753225	0.045
99	S6	Water	2	1.51449	0.16
100	S6	Water	2	1.63411	0.276
101	S6	Water	2	1.76356	0.499
102	S6	Water	2	1.8188	0.687
103	S6	Water	2	1.79433	0.855
104	S6	Water	2	1.83411	1.1524
105	S6	Water	3	0.986176	0.045
106	S6	Water	3	1.1731	0.16
107	S6	Water	3	1.21007	0.276
108	S6	Water	3	1.28611	0.499
109	S6	Water	3	1.33509	0.687
110	S6	Water	3	1.33601	0.855
111	S6	Water	3	1.32456	1.1524
112	S4	Water	1	0.405985	0.045
113	S4	Water	1	0.86141	0.16
114	S4	Water	1	0.923258	0.276
115	S4	Water	1	1.06679	0.499
116	S4	Water	1	1.13327	0.687
117	S4	Water	1	1.11287	0.855
118	S4	Water	1	1.19919	1.1524
119	S4	Water	2	0.497437	0.045
120	S4	Water	2	1.20066	0.16
121	S4	Water	2	1.41429	0.276
122	S4	Water	2	1.61519	0.499
123	S4	Water	2	1.69281	0.687
124	S4	Water	2	1.76514	0.855
125	S4	Water	2	1.76056	1.1524
126	S4	Water	3	0.654093	0.045
127	S4	Water	3	1.14822	0.16
128	S4	Water	3	1.23769	0.276
129	S4	Water	3	1.36826	0.499
130	S4	Water	3	1.42548	0.687
131	S4	Water	3	1.48193	0.855
132	S4	Water	3	1.5211	1.1524
133	S10	Alcohol	1	0.254974	0.045
134	S10	Alcohol	1	0.98053	0.16
135	S10	Alcohol	1	1.19883	0.276
136	S10	Alcohol	1	1.30086	0.499
137	S10	Alcohol	1	1.31587	0.687
138	S10	Alcohol	1	1.32456	0.855
139	S10	Alcohol	1	1.31175	1.1524
140	S10	Alcohol	2	0.942485	0.045
141	S10	Alcohol	2	1.25198	0.16
142	S10	Alcohol	2	1.39587	0.276
143	S10	Alcohol	2	1.41708	0.499
144	S10	Alcohol	2	1.34995	0.687
145	S10	Alcohol	2	1.30697	0.855
146	S10	Alcohol	2	1.2945	1.1524
147	S10	Alcohol	3	0.0893148	0.045
148	S10	Alcohol	3	0.489655	0.16
149	S10	Alcohol	3	0.715688	0.276
150	S10	Alcohol	3	0.926565	0.499
151	S10	Alcohol	3	0.957591	0.687
152	S10	Alcohol	3	0.998688	0.855
153	S10	Alcohol	3	1.06038	1.1524
154	S1	Alcohol	1	0.389201	0.045
155	S1	Alcohol	1	1.48855	0.16
156	S1	Alcohol	1	1.83609	0.276
157	S1	Alcohol	1	2.0399	0.499
158	S1	Alcohol	1	2.1286	0.687
159	S1	Alcohol	1	2.14198	0.855
160	S1	Alcohol	1	2.1403	1.1524
161	S1	Alcohol	2	0.945231	0.045
162	S1	Alcohol	2	1.4357	0.16
163	S1	Alcohol	2	1.39674	0.276
164	S1	Alcohol	2	1.42064	0.499
165	S1	Alcohol	2	1.37405	0.687
166	S1	Alcohol	2	1.33072	0.855
167	S1	Alcohol	2	1.2678	1.1524
168	S9	Water	1	0.193634	0.045
169	S9	Water	1	0.778453	0.16
170	S9	Water	1	1.01191	0.276
171	S9	Water	1	1.16745	0.499
172	S9	Water	1	1.24827	0.687
173	S9	Water	1	1.26984	0.855
174	S9	Water	1	1.26801	1.1524
175	S9	Water	2	0.503387	0.045
176	S9	Water	2	0.961049	0.16
177	S9	Water	2	1.09782	0.276
178	S9	Water	2	1.20667	0.499
179	S9	Water	2	1.22218	0.687
180	S9	Water	2	1.23805	0.855
181	S9	Water	2	1.21384	1.1524
