# Supplementary material for: The role of anterior insular cortex inputs to dorsolateral striatum in binge alcohol drinking
Source: eLife journal article supplement (doi:10.7554/elife.77411), 2022-07-28
Supplement: fig2-data1 [file Fig2D.xlsx]

## Sheet: Sheet1
	Fluid	Session	Intake
510	Water	1	36.4035
511	Water	1	26.6968
512	Water	1	37.788
513	Water	1	29.5082
516	Water	2	26.3158
517	Water	2	28.0543
518	Water	2	34.5622
519	Water	2	27.0492
522	Water	3	34.4828
523	Water	3	25.3333
524	Water	3	32.8767
525	Water	3	18.595
528	Water	4	34.4828
529	Water	4	32
530	Water	4	30.137
531	Water	4	23.9669
534	Water	5	76.9874
535	Water	5	65.2174
536	Water	5	66.2222
537	Water	5	57.9365
540	Water	6	41.7021
541	Water	6	39.4737
542	Water	6	24.4344
543	Water	6	28.8
546	Water	7	31.9149
547	Water	7	32.4561
548	Water	7	20.8145
549	Water	7	34.8
552	Water	8	37.9167
553	Water	8	36.1702
554	Water	8	18.8341
555	Water	8	36.4341
558	Water	9	38.75
559	Water	9	39.5745
560	Water	9	25.5605
561	Water	9	45.3488
564	Water	10	80.1653
565	Water	10	51.6949
566	Water	10	58.6957
567	Water	10	56.705
570	Water	11	42.0408
571	Water	11	47.4359
572	Water	11	29.7778
573	Water	11	28.8973
576	Water	12	31.4286
577	Water	12	44.4444
578	Water	12	32.4444
579	Water	12	35.7414
582	Water	13	39.6761
583	Water	13	45.7983
584	Water	13	31.7181
585	Water	13	37.3585
588	Water	14	34.8178
589	Water	14	47.479
590	Water	14	34.3612
591	Water	14	27.5472
594	Water	15	73.1225
595	Water	15	72.428
596	Water	15	58.952
690	Water	1	14.3411
691	Water	1	1.68067
692	Water	1	4.36508
693	Water	1	10.8696
694	Water	1	9.87654
695	Water	2	17.8295
696	Water	2	1.68067
697	Water	2	21.0317
698	Water	2	17.3913
699	Water	2	16.8724
700	Water	3	16.9231
701	Water	3	2.14592
702	Water	3	26.2357
703	Water	3	10.7296
704	Water	3	23.2653
705	Water	4	31.9231
706	Water	4	2.14592
707	Water	4	28.8973
708	Water	4	17.5966
709	Water	4	19.1837
710	Water	5	56.2264
711	Water	5	41.4634
712	Water	5	53.9623
713	Water	5	43.5146
714	Water	5	48.8189
715	Water	6	30.9434
716	Water	6	33.3333
717	Water	6	20.3065
718	Water	6	21.371
719	Water	6	21.2
720	Water	7	32.0755
721	Water	7	15.0407
722	Water	7	28.3525
723	Water	7	17.7419
724	Water	7	21.6
725	Water	8	38.2022
726	Water	8	29.0984
727	Water	8	36.3636
728	Water	8	11.5538
729	Water	8	28.7402
730	Water	9	23.5955
731	Water	9	21.3115
732	Water	9	26.5152
733	Water	9	7.17131
734	Water	9	22.4409
735	Water	10	66.2921
736	Water	10	45.9016
737	Water	10	55.303
738	Water	10	60.1594
739	Water	10	65.748
740	Water	11	28.7823
741	Water	11	13.9442
742	Water	11	34.5455
743	Water	11	18.7266
744	Water	11	33.7121
745	Water	12	27.6753
746	Water	12	17.9283
747	Water	12	38.1818
748	Water	12	22.4719
749	Water	12	32.197
750	Water	13	34.3173
751	Water	13	20.7031
752	Water	13	31.8021
753	Water	13	21.2687
754	Water	13	27.7154
755	Water	14	30.9963
756	Water	14	23.0469
757	Water	14	29.682
758	Water	14	26.1194
759	Water	14	31.8352
760	Water	15	61.6788
761	Water	15	62.6923
762	Water	15	55.516
763	Water	15	50.7299
764	Water	15	54.5788
992	Water	1	3.11111
993	Water	1	1.84332
994	Water	1	3.39806
995	Water	1	2.46305
998	Water	2	1.77778
999	Water	2	1.38249
1000	Water	2	49.5146
1001	Water	2	17.2414
1004	Water	3	1.31004
1005	Water	3	3.65297
1006	Water	3	2.39234
1007	Water	3	13.4615
1010	Water	4	60.6987
1011	Water	4	71.2329
1012	Water	4	53.11
1013	Water	4	61.0577
1016	Water	5	58.5366
1017	Water	5	57.265
1018	Water	5	43.8356
1019	Water	5	48.1481
1022	Water	6	40.8907
1023	Water	6	30.9322
1024	Water	6	28.6996
1025	Water	6	20.8333
1028	Water	7	84.6154
1029	Water	7	87.7119
1030	Water	7	56.0538
1031	Water	7	71.2963
1034	Water	8	44.7876
1035	Water	8	30
1036	Water	8	31.441
1037	Water	8	32.1429
1040	Water	9	37.0656
1041	Water	9	37.0833
1042	Water	9	35.8079
1043	Water	9	28.125
1046	Water	10	64.6388
1047	Water	10	64.876
1048	Water	10	68.9362
1049	Water	10	62.7193
1052	Water	11	34.5865
1053	Water	11	51.2195
1054	Water	11	39.2241
1055	Water	11	33.6245
1058	Water	12	21.8045
1059	Water	12	43.0894
1060	Water	12	32.7586
1061	Water	12	30.5677
1064	Water	13	38.3459
1065	Water	13	38.5542
1066	Water	13	31.0638
1067	Water	13	22.9437
1070	Water	14	40.2256
1071	Water	14	45.3815
1072	Water	14	33.617
1073	Water	14	27.2727
1076	Water	15	50
1077	Water	15	76.1719
1078	Water	15	61.6034
1079	Water	15	61.6034
1153	Water	1	20.1493
1154	Water	1	2.87081
1155	Water	1	2.81124
1156	Water	1	50.3968
1157	Water	1	26.5873
1158	Water	1	24.3902
1159	Water	2	19.7761
1160	Water	2	2.87081
1161	Water	2	3.21285
1162	Water	2	37.6984
1163	Water	2	26.9841
1164	Water	2	18.6992
1165	Water	3	14.1791
1166	Water	3	1.86047
1167	Water	3	16.9291
1168	Water	3	21.0317
1169	Water	3	20.7031
1170	Water	3	20.0803
1171	Water	4	19.403
1172	Water	4	5.11628
1173	Water	4	33.4646
1174	Water	4	21.8254
1175	Water	4	26.5625
1176	Water	4	32.5301
1177	Water	5	50.3731
1178	Water	5	33.9535
1179	Water	5	66.5354
1180	Water	5	44.4444
1181	Water	5	52.7344
1182	Water	5	72.6908
1183	Water	6	22.1818
1184	Water	6	25.1101
1185	Water	6	25.969
1186	Water	6	15.3543
1187	Water	6	23.4375
1188	Water	6	31.1284
1189	Water	7	33.0909
1190	Water	7	39.207
1191	Water	7	25.5814
1192	Water	7	23.622
1193	Water	7	23.0469
1194	Water	7	33.0739
1195	Water	8	16.4286
1196	Water	8	19.7368
1197	Water	8	33.8346
1198	Water	8	24.7104
1199	Water	8	13.7931
1200	Water	8	32.3194
1201	Water	9	21.7857
1202	Water	9	30.2632
1203	Water	9	27.8195
1204	Water	9	17.7606
1205	Water	9	20.6897
1206	Water	9	37.6426
1207	Water	10	53.5714
1208	Water	10	51.7544
1209	Water	10	49.2481
1210	Water	10	45.9459
1211	Water	10	59.387
1212	Water	10	71.4829
1213	Water	11	27.4306
1214	Water	11	24.5833
1215	Water	11	35.206
1216	Water	11	25.283
1217	Water	11	23.3962
1218	Water	11	30.5019
1219	Water	12	24.6528
1220	Water	12	24.5833
1221	Water	12	35.5805
1222	Water	12	19.2453
1223	Water	12	18.8679
1224	Water	12	34.749
1225	Water	13	36.9338
1226	Water	13	25.5144
1227	Water	13	36.63
1228	Water	13	32.7068
1229	Water	13	22.1402
1230	Water	13	38.1132
1231	Water	14	28.223
1232	Water	14	23.8683
1233	Water	14	39.1941
1234	Water	14	26.3158
1235	Water	14	53.5055
1236	Water	14	36.6038
1237	Water	15	66.2021
1238	Water	15	56.7901
1239	Water	15	61.1722
1240	Water	15	55.2632
1241	Water	15	51.6605
1242	Water	15	62.2642
