# Supplementary material for: The role of anterior insular cortex inputs to dorsolateral striatum in binge alcohol drinking
Source: eLife journal article supplement (doi:10.7554/elife.77411), 2022-07-28
Supplement: fig2-data1 [file Fig2E.xlsx]

## Sheet: Sheet1
	Fluid	Session	Intake
0	Alcohol	1	0
1	Alcohol	1	1.96112
3	Alcohol	1	0
4	Alcohol	1	3.07334
5	Alcohol	1	0
6	Alcohol	2	0
7	Alcohol	2	1.96112
9	Alcohol	2	0
10	Alcohol	2	1.53667
11	Alcohol	2	4.05297
12	Alcohol	3	0
13	Alcohol	3	2.66862
15	Alcohol	3	0
16	Alcohol	3	2.30501
17	Alcohol	3	3.82356
18	Alcohol	4	2.13314
19	Alcohol	4	2.66862
21	Alcohol	4	0
22	Alcohol	4	3.84168
23	Alcohol	4	5.35298
24	Alcohol	5	2.93428
25	Alcohol	5	7.21987
27	Alcohol	5	0.743664
28	Alcohol	5	3.13273
29	Alcohol	5	5.42982
30	Alcohol	6	2.12383
31	Alcohol	6	1.33983
33	Alcohol	6	0.730265
34	Alcohol	6	2.21071
35	Alcohol	6	2.97466
36	Alcohol	7	2.83177
37	Alcohol	7	1.33983
39	Alcohol	7	0.730265
40	Alcohol	7	2.94762
41	Alcohol	7	2.97466
42	Alcohol	8	3.47895
43	Alcohol	8	2.61482
45	Alcohol	8	4.1392
46	Alcohol	8	3.66785
47	Alcohol	8	7.07943
48	Alcohol	9	2.78316
49	Alcohol	9	1.96112
51	Alcohol	9	3.44934
52	Alcohol	9	3.66785
53	Alcohol	9	6.37148
54	Alcohol	10	4.06993
55	Alcohol	10	3.20393
57	Alcohol	10	2.70198
58	Alcohol	10	5.11186
59	Alcohol	10	7.1418
60	Alcohol	11	2.0696
61	Alcohol	11	3.19132
63	Alcohol	11	3.39161
64	Alcohol	11	3.61872
65	Alcohol	11	4.22919
66	Alcohol	12	2.75947
67	Alcohol	12	4.46784
69	Alcohol	12	4.74825
70	Alcohol	12	3.61872
71	Alcohol	12	4.93405
72	Alcohol	13	4.01948
73	Alcohol	13	4.39857
75	Alcohol	13	5.22964
76	Alcohol	13	2.84419
77	Alcohol	13	3.52432
78	Alcohol	14	2.67965
79	Alcohol	14	3.14184
81	Alcohol	14	4.57594
82	Alcohol	14	4.26629
83	Alcohol	14	6.34378
84	Alcohol	15	2.06083
85	Alcohol	15	0.640786
87	Alcohol	15	5.20864
88	Alcohol	15	5.0437
89	Alcohol	15	4.87052
180	Alcohol	1	0.686944
182	Alcohol	1	0
184	Alcohol	1	1.38563
185	Alcohol	2	2.61039
187	Alcohol	2	2.84697
189	Alcohol	2	1.73204
190	Alcohol	3	1.749
192	Alcohol	3	3.77207
194	Alcohol	3	3.25623
195	Alcohol	4	2.55623
197	Alcohol	4	2.16694
199	Alcohol	4	2.07845
200	Alcohol	5	2.71301
202	Alcohol	5	3.43404
204	Alcohol	5	4.91672
205	Alcohol	6	4.05297
207	Alcohol	6	2.07451
209	Alcohol	6	2.4741
210	Alcohol	7	1.43413
212	Alcohol	7	3.68801
214	Alcohol	7	2.60432
215	Alcohol	8	2.90824
217	Alcohol	8	3.51767
219	Alcohol	8	3.79564
220	Alcohol	9	3.03199
222	Alcohol	9	3.74709
224	Alcohol	9	2.50898
225	Alcohol	10	4.64081
227	Alcohol	10	5.4291
229	Alcohol	10	3.75099
230	Alcohol	11	3.35006
232	Alcohol	11	3.25718
234	Alcohol	11	2.27093
235	Alcohol	12	4.06793
237	Alcohol	12	4.1455
239	Alcohol	12	1.64011
240	Alcohol	13	2.89921
242	Alcohol	13	3.81456
244	Alcohol	13	2.39494
245	Alcohol	14	3.01754
247	Alcohol	14	4.32806
249	Alcohol	14	2.45635
250	Alcohol	15	4.9109
252	Alcohol	15	5.47799
254	Alcohol	15	4.14723
330	Alcohol	1	0
331	Alcohol	1	2.25735
332	Alcohol	1	0
333	Alcohol	1	0
334	Alcohol	1	0
335	Alcohol	1	0
336	Alcohol	2	0
337	Alcohol	2	3.62544
338	Alcohol	2	0
339	Alcohol	2	1.40682
340	Alcohol	2	0
341	Alcohol	2	0
342	Alcohol	3	0.148733
343	Alcohol	3	3.22892
344	Alcohol	3	0
345	Alcohol	3	1.81573
346	Alcohol	3	0
347	Alcohol	3	0
348	Alcohol	4	0.743664
349	Alcohol	4	2.21988
350	Alcohol	4	0
351	Alcohol	4	3.30722
352	Alcohol	4	0
353	Alcohol	4	0
354	Alcohol	5	3.92342
355	Alcohol	5	5.18249
356	Alcohol	5	0
357	Alcohol	5	5.14966
358	Alcohol	5	0.213314
359	Alcohol	5	0
360	Alcohol	6	0.363495
361	Alcohol	6	3.33209
362	Alcohol	6	0
363	Alcohol	6	2.76482
364	Alcohol	6	3.67192
365	Alcohol	6	0
366	Alcohol	7	0.363495
367	Alcohol	7	3.20393
368	Alcohol	7	2.98066
369	Alcohol	7	3.14184
370	Alcohol	7	2.49414
371	Alcohol	7	0
372	Alcohol	8	1.76216
373	Alcohol	8	3.21714
374	Alcohol	8	2.81006
375	Alcohol	8	2.9764
376	Alcohol	8	3.36603
377	Alcohol	8	0.0684046
378	Alcohol	9	2.46703
379	Alcohol	9	3.28023
380	Alcohol	9	2.88211
381	Alcohol	9	2.40645
382	Alcohol	9	3.7095
383	Alcohol	9	2.87299
384	Alcohol	10	3.3687
385	Alcohol	10	3.6381
386	Alcohol	10	3.96448
387	Alcohol	10	3.76017
388	Alcohol	10	5.27053
389	Alcohol	10	6.09678
390	Alcohol	11	1.87863
391	Alcohol	11	2.46017
392	Alcohol	11	2.73707
393	Alcohol	11	3.04361
394	Alcohol	11	3.47866
395	Alcohol	11	1.9754
396	Alcohol	12	0.765368
397	Alcohol	12	2.77558
398	Alcohol	12	3.0178
399	Alcohol	12	2.60881
400	Alcohol	12	3.80684
401	Alcohol	12	3.13339
402	Alcohol	13	1.60721
403	Alcohol	13	3.46947
404	Alcohol	13	3.74644
405	Alcohol	13	2.99767
406	Alcohol	13	4.03643
407	Alcohol	13	4.13637
408	Alcohol	14	1.95661
409	Alcohol	14	2.58633
410	Alcohol	14	3.67833
411	Alcohol	14	2.93649
412	Alcohol	14	1.65427
413	Alcohol	14	3.33578
414	Alcohol	15	4.82907
415	Alcohol	15	4.69456
416	Alcohol	15	4.39644
417	Alcohol	15	5.01651
418	Alcohol	15	4.15182
419	Alcohol	15	4.57594
514	Alcohol	1	2.85274
515	Alcohol	1	2.01679
520	Alcohol	2	3.13105
521	Alcohol	2	2.40463
526	Alcohol	3	2.7928
527	Alcohol	3	3.88172
532	Alcohol	4	3.47398
533	Alcohol	4	2.66392
538	Alcohol	5	1.77105
539	Alcohol	5	7.02266
544	Alcohol	6	2.5145
545	Alcohol	6	3.46345
550	Alcohol	7	0.463197
551	Alcohol	7	4.05297
556	Alcohol	8	2.28797
557	Alcohol	8	3.8704
562	Alcohol	9	1.04593
563	Alcohol	9	3.21317
568	Alcohol	10	3.43692
569	Alcohol	10	5.42777
574	Alcohol	11	2.4741
575	Alcohol	11	4.22919
580	Alcohol	12	1.10684
581	Alcohol	12	4.08821
586	Alcohol	13	1.15341
587	Alcohol	13	3.6337
592	Alcohol	14	1.40973
593	Alcohol	14	3.77346
598	Alcohol	15	4.73992
599	Alcohol	15	4.58827
