# Supplementary material for: The role of anterior insular cortex inputs to dorsolateral striatum in binge alcohol drinking
Source: eLife journal article supplement (doi:10.7554/elife.77411), 2022-07-28
Supplement: fig2-data1 [file Fig2G.xlsx]

## Sheet: Sheet1
	Fluid	DIDWeek	Total Intake % Change
86	Water	3	0
87	Water	4	6.9462
88	Water	5	-0.0934977
89	Water	6	3.18222
92	Water	3	0
93	Water	4	-14.2052
94	Water	5	38.143
95	Water	6	-0.864092
98	Water	3	0
99	Water	4	-3.58658
100	Water	5	-3.99884
101	Water	6	-4.07011
104	Water	3	0
105	Water	4	1.62453
106	Water	5	-10.2607
107	Water	6	-19.0313
110	Water	3	0
111	Water	4	-2.03291
112	Water	5	-8.65097
113	Water	6	-2.80588
116	Water	3	0
117	Water	4	-5.5938
118	Water	5	-7.99425
119	Water	6	-11.9343
122	Water	3	0
123	Water	4	-17.7915
124	Water	5	-22.9455
125	Water	6	-27.1756
128	Water	3	0
129	Water	4	1.2449
130	Water	5	-11.434
131	Water	6	-4.66614
134	Water	3	0
135	Water	4	42.5136
136	Water	5	52.1133
137	Water	6	55.4341
152	Water	3	0
153	Water	4	-20.1582
154	Water	5	-23.6182
155	Water	6	-27.5897
158	Water	3	0
159	Water	4	9.20804
160	Water	5	-0.357044
161	Water	6	-9.34541
164	Water	3	0
165	Water	4	23.8119
166	Water	5	-8.32352
167	Water	6	-6.57424
170	Water	3	0
171	Water	4	8.81337
172	Water	5	0.21213
173	Water	6	-14.2123
176	Water	3	0
177	Water	4	-37.4575
178	Water	5	-66.541
179	Water	6	-45.9815
182	Water	3	0
183	Water	4	-5.23283
184	Water	5	-5.66966
185	Water	6	-7.178
188	Water	3	0
189	Water	4	-29.3901
190	Water	5	-62.8152
191	Water	6	-55.6433
194	Water	3	0
195	Water	4	0.230272
196	Water	5	3.65799
197	Water	6	3.31595
200	Water	3	0
201	Water	4	-14.4989
202	Water	5	-30.977
203	Water	6	-28.5657
206	Water	3	0
207	Water	4	2.08063
208	Water	5	-4.57832
209	Water	6	-11.3292
