# Supplementary material for: The role of anterior insular cortex inputs to dorsolateral striatum in binge alcohol drinking
Source: eLife journal article supplement (doi:10.7554/elife.77411), 2022-07-28
Supplement: fig2-data1 [file Fig2H.xlsx]

## Sheet: Sheet1
	Fluid	DIDWeek	Total Intake % Change
2	Alcohol	3	0
3	Alcohol	4	15.7549
4	Alcohol	5	2.18854
5	Alcohol	6	-3.14279
8	Alcohol	3	0
9	Alcohol	4	6.87409
10	Alcohol	5	4.77396
11	Alcohol	6	-4.19426
14	Alcohol	3	0
15	Alcohol	4	15.4506
16	Alcohol	5	42.1935
17	Alcohol	6	45.215
20	Alcohol	3	0
21	Alcohol	4	-31.443
22	Alcohol	5	-29.2419
23	Alcohol	6	-6.32812
26	Alcohol	3	0
27	Alcohol	4	56.2333
28	Alcohol	5	66.5839
29	Alcohol	6	52.8023
32	Alcohol	3	0
33	Alcohol	4	22.161
34	Alcohol	5	20.2622
35	Alcohol	6	19.0692
38	Alcohol	3	0
39	Alcohol	4	-1.11864
40	Alcohol	5	-16.0821
41	Alcohol	6	-3.19323
44	Alcohol	3	0
45	Alcohol	4	2.12714
46	Alcohol	5	10.4315
47	Alcohol	6	7.67234
50	Alcohol	3	0
51	Alcohol	4	0.150357
52	Alcohol	5	-6.5935
53	Alcohol	6	4.04406
56	Alcohol	3	0
57	Alcohol	4	-2.73933
58	Alcohol	5	-7.36079
59	Alcohol	6	-5.99563
62	Alcohol	3	0
63	Alcohol	4	-22.2427
64	Alcohol	5	-25.0026
65	Alcohol	6	-32.2669
68	Alcohol	3	0
69	Alcohol	4	-24.5094
70	Alcohol	5	-22.3248
71	Alcohol	6	7.96873
74	Alcohol	3	0
75	Alcohol	4	-11.6471
76	Alcohol	5	-36.9717
77	Alcohol	6	-46.8853
80	Alcohol	3	0
81	Alcohol	4	3.96724
82	Alcohol	5	-11.6987
83	Alcohol	6	-14.728
140	Alcohol	3	0
141	Alcohol	4	-10.8595
142	Alcohol	5	10.9345
143	Alcohol	6	43.2332
146	Alcohol	3	0
147	Alcohol	4	-5.63213
148	Alcohol	5	-0.756335
149	Alcohol	6	6.07516
