# Supplementary material for: The role of anterior insular cortex inputs to dorsolateral striatum in binge alcohol drinking
Source: eLife journal article supplement (doi:10.7554/elife.77411), 2022-07-28
Supplement: fig2-figsupp2-data1 [file Fig2S2A.xlsx]

## Sheet: Sheet1
	Fluid	Intake	Total Alcohol Licks
510	Water	36.4035	296
511	Water	26.6968	161
512	Water	37.788	305
513	Water	29.5082	513
516	Water	26.3158	340
517	Water	28.0543	154
518	Water	34.5622	320
519	Water	27.0492	433
522	Water	34.4828	357
523	Water	25.3333	103
524	Water	32.8767	162
525	Water	18.595	231
528	Water	34.4828	332
529	Water	32	117
530	Water	30.137	159
531	Water	23.9669	240
534	Water	76.9874	600
535	Water	65.2174	298
536	Water	66.2222	251
537	Water	57.9365	641
540	Water	41.7021	349
541	Water	39.4737	175
542	Water	24.4344	54
543	Water	28.8	237
546	Water	31.9149	273
547	Water	32.4561	177
548	Water	20.8145	94
549	Water	34.8	288
552	Water	37.9167	245
553	Water	36.1702	205
554	Water	18.8341	68
555	Water	36.4341	208
558	Water	38.75	213
559	Water	39.5745	180
560	Water	25.5605	150
561	Water	45.3488	380
564	Water	80.1653	373
565	Water	51.6949	181
566	Water	58.6957	203
567	Water	56.705	605
570	Water	42.0408	115
571	Water	47.4359	192
572	Water	29.7778
573	Water	28.8973	199
576	Water	31.4286	102
577	Water	44.4444	191
578	Water	32.4444	115
579	Water	35.7414	288
582	Water	39.6761	313
583	Water	45.7983	164
584	Water	31.7181	90
585	Water	37.3585	387
588	Water	34.8178	67
589	Water	47.479	180
590	Water	34.3612
591	Water	27.5472	174
594	Water	73.1225	370
595	Water	72.428	305
596	Water	58.952	300
600	Water	30.4	118
601	Water	34.0336	184
602	Water	27.7056	80
603	Water	32.7138	161
606	Water	41.6	223
607	Water	41.5966	167
608	Water	32.4675	85
609	Water	33.0855	252
612	Water	39.4531	143
613	Water	32.2314	124
614	Water	31.6239	104
615	Water	29.5203	278
618	Water	30.4688	60
619	Water	27.686	113
620	Water	25.2137	96
621	Water	25.8303	386
624	Water	66.7969	211
625	Water	76.2097	147
626	Water	72.5738	397
627	Water	63.4686	1028
630	Water	34.4961	125
631	Water	37.1429	128
632	Water	28.7554	33
633	Water	36.3636	367
636	Water	34.4961	249
637	Water	37.9592	133
638	Water	36.9099	101
639	Water	32.3636	325
642	Water	34.6154	68
643	Water	33.3333	94
644	Water	26.3598	130
645	Water	33.8129	206
648	Water	29.6154	228
649	Water	30.5221	99
650	Water	14.2259	36
651	Water	29.4964	216
654	Water	70.1887	732
655	Water	59.5238	254
656	Water	59.5918	276
657	Water	65.0177	633
660	Water	35.9073	215
661	Water	28.6853	120
662	Water	36.4017	10
663	Water	36.7857	172
666	Water	30.888	185
667	Water	32.6693	118
668	Water	29.7071	59
669	Water	34.6429	175
672	Water	26.616	184
673	Water	35.7143	118
674	Water	38.5542	171
675	Water	41.958	260
678	Water	31.1787	237
679	Water	32.5397	117
680	Water	26.506	114
681	Water	28.6713	181
684	Water	70.1107	632
685	Water	57.9767	305
686	Water	47.3469	16
687	Water	59.2982	650
690	Water	14.3411	197
691	Water	1.68067
692	Water	4.36508	200
693	Water	10.8696	18
694	Water	9.87654	144
695	Water	17.8295	193
696	Water	1.68067	96
697	Water	21.0317	66
698	Water	17.3913	214
699	Water	16.8724	176
700	Water	16.9231	9
701	Water	2.14592	78
702	Water	26.2357	140
703	Water	10.7296	205
704	Water	23.2653	198
705	Water	31.9231	195
706	Water	2.14592	124
707	Water	28.8973	292
708	Water	17.5966	148
709	Water	19.1837	144
710	Water	56.2264	62
711	Water	41.4634	729
712	Water	53.9623	307
713	Water	43.5146	501
714	Water	48.8189	295
715	Water	30.9434	441
716	Water	33.3333	610
717	Water	20.3065	223
718	Water	21.371	164
719	Water	21.2	143
720	Water	32.0755	434
721	Water	15.0407	166
722	Water	28.3525	198
723	Water	17.7419	167
724	Water	21.6	135
725	Water	38.2022
726	Water	29.0984	124
727	Water	36.3636
728	Water	11.5538	368
729	Water	28.7402	143
730	Water	23.5955	296
731	Water	21.3115
732	Water	26.5152	333
733	Water	7.17131	108
734	Water	22.4409	139
735	Water	66.2921	884
736	Water	45.9016
737	Water	55.303	660
738	Water	60.1594	520
739	Water	65.748	285
740	Water	28.7823
741	Water	13.9442
742	Water	34.5455	256
743	Water	18.7266	153
744	Water	33.7121	202
745	Water	27.6753	292
746	Water	17.9283
747	Water	38.1818	392
748	Water	22.4719	185
749	Water	32.197	109
750	Water	34.3173	186
751	Water	20.7031	160
752	Water	31.8021	232
753	Water	21.2687	322
754	Water	27.7154	116
755	Water	30.9963	312
756	Water	23.0469	79
757	Water	29.682	221
758	Water	26.1194	450
759	Water	31.8352	129
760	Water	61.6788	791
761	Water	62.6923	164
762	Water	55.516	588
763	Water	50.7299	974
764	Water	54.5788	271
765	Water	40.2174	384
766	Water	15.0579	32
767	Water	31.4488	140
768	Water	25.1825	287
769	Water	33.3333	86
770	Water	44.5652	374
771	Water	17.7606	79
772	Water	38.5159	326
773	Water	25.1825	384
774	Water	32.2464	223
775	Water	29.6029	354
776	Water	23.3962	202
777	Water	33.218	286
778	Water	17.9211	189
779	Water	30.8511	205
780	Water	33.935	402
781	Water	20.7547	98
782	Water	28.0277	213
783	Water	24.3728	240
784	Water	25.1773	127
785	Water	47.8723	617
786	Water	41.6974	144
787	Water	51.7123	192
788	Water	48.9209	456
789	Water	54.7703	243
790	Water	28.4173	269
791	Water	9.66543	46
792	Water	28.866	285
793	Water	16.0714	193
794	Water	21.2766	120
795	Water	33.4532	261
796	Water	17.1004	83
797	Water	31.9588	267
798	Water	21.4286	236
799	Water	29.4326	184
800	Water	26.9504
801	Water	18.0812	56
802	Water	33.7884	350
803	Water	22.1831	334
804	Water	31.4685	239
805	Water	28.7234	325
806	Water	88.9299	541
807	Water	30.7167	239
808	Water	21.4789	394
809	Water	29.021	186
810	Water	65.7343	77
811	Water	57.2954	229
812	Water	56.8106	551
813	Water	43.8596	555
814	Water	53.2646	448
815	Water	28.5714	239
816	Water	20.073	39
817	Water	29.3333	92
818	Water	9.18728	53
819	Water	25.1748	104
820	Water	36.0714
821	Water	25.1825	107
822	Water	37	312
823	Water	22.9682	174
824	Water	36.3636	160
825	Water	29.3706	266
826	Water	25.3623	90
827	Water	31.3725	149
828	Water	17.4216	392
829	Water	25.8621	182
830	Water	30.7692
831	Water	21.0145	78
832	Water	27.451	259
833	Water	14.6341	80
834	Water	27.2414	118
835	Water	64.5051	161
836	Water	45.4874	206
837	Water	56.8484	485
838	Water	48.5915	349
839	Water	60.3448	333
992	Water	3.11111	13
993	Water	1.84332	28
994	Water	3.39806	54
995	Water	2.46305	47
998	Water	1.77778	6
999	Water	1.38249	76
1000	Water	49.5146	20
1001	Water	17.2414	236
1004	Water	1.31004	18
1005	Water	3.65297	48
1006	Water	2.39234	3
1007	Water	13.4615	165
1010	Water	60.6987	867
1011	Water	71.2329	595
1012	Water	53.11	445
1013	Water	61.0577	687
1016	Water	58.5366	418
1017	Water	57.265	826
1018	Water	43.8356	367
1019	Water	48.1481	900
1022	Water	40.8907	51
1023	Water	30.9322	307
1024	Water	28.6996	150
1025	Water	20.8333	238
1028	Water	84.6154	709
1029	Water	87.7119	682
1030	Water	56.0538	320
1031	Water	71.2963	555
1034	Water	44.7876	173
1035	Water	30	203
1036	Water	31.441	220
1037	Water	32.1429	241
1040	Water	37.0656	147
1041	Water	37.0833	281
1042	Water	35.8079	319
1043	Water	28.125	137
1046	Water	64.6388	458
1047	Water	64.876	274
1048	Water	68.9362	608
1049	Water	62.7193	498
1052	Water	34.5865	96
1053	Water	51.2195	194
1054	Water	39.2241	500
1055	Water	33.6245	216
1058	Water	21.8045	195
1059	Water	43.0894	344
1060	Water	32.7586	220
1061	Water	30.5677	224
1064	Water	38.3459	254
1065	Water	38.5542	362
1066	Water	31.0638	148
1067	Water	22.9437	170
1070	Water	40.2256	231
1071	Water	45.3815	139
1072	Water	33.617	238
1073	Water	27.2727	199
1076	Water	50	275
1077	Water	76.1719	739
1078	Water	61.6034	209
1079	Water	61.6034	578
1082	Water	35.9551	266
1083	Water	32.3887	356
1084	Water	38.4937	187
1085	Water	18.1034	111
1088	Water	35.206	264
1089	Water	42.1053	372
1090	Water	36.8201	209
1091	Water	28.8793	279
1094	Water	31.5985	136
1095	Water	36.1446	366
1096	Water	37.5	158
1097	Water	80.4255	723
1100	Water	33.829	152
1101	Water	30.9237	83
1102	Water	40	274
1103	Water	24.2553	38
1106	Water	52.2222	590
1107	Water	61.5686	525
1108	Water	63.7097	114
1109	Water	66.2602	871
1112	Water	29.927	242
1113	Water	28.8538	256
1114	Water	31.8725	117
1115	Water	29.4606	100
1117	Water	26.2774	263
1118	Water	41.502	657
1119	Water	44.6215	168
1120	Water	29.8755	84
1121	Water	31.5217	336
1122	Water	34.1085	399
1123	Water	31.3253	175
1124	Water	22.7273	228
1125	Water	34.4203	344
1126	Water	34.8837	303
1127	Water	34.9398	214
1128	Water	24.3802	205
1129	Water	54.3478	306
1130	Water	54.9801	793
1131	Water	54.8	116
1132	Water	54.918	524
1133	Water	28.2686	158
1134	Water	27.0992	287
1135	Water	26.07	28
1136	Water	27.0492	352
1137	Water	27.5618	311
1138	Water	33.9695	373
1139	Water	34.2412	325
1140	Water	28.6885	382
1141	Water	32.7526	119
1142	Water	34.6008	551
1143	Water	36.4706	94
1144	Water	24.3902	277
1145	Water	28.5714	206
1146	Water	33.4601	587
1147	Water	33.7255	203
1148	Water	25.2033	40
1149	Water	46.8531	84
1150	Water	55.0943	858
1151	Water	49.2308	446
1152	Water	59.1093	823
1153	Water	20.1493	170
1154	Water	2.87081
1155	Water	2.81124	2
1156	Water	50.3968	33
1157	Water	26.5873	107
1158	Water	24.3902	185
1159	Water	19.7761	188
1160	Water	2.87081
1161	Water	3.21285	9
1162	Water	37.6984	102
1163	Water	26.9841	270
1164	Water	18.6992	184
1165	Water	14.1791	156
1166	Water	1.86047	3
1167	Water	16.9291	254
1168	Water	21.0317	209
1169	Water	20.7031	189
1170	Water	20.0803	172
1171	Water	19.403	197
1172	Water	5.11628
1173	Water	33.4646	143
1174	Water	21.8254	174
1175	Water	26.5625	176
1176	Water	32.5301	233
1177	Water	50.3731	621
1178	Water	33.9535	367
1179	Water	66.5354	324
1180	Water	44.4444	554
1181	Water	52.7344	268
1182	Water	72.6908	431
1183	Water	22.1818	453
1184	Water	25.1101	344
1185	Water	25.969	154
1186	Water	15.3543	185
1187	Water	23.4375	135
1188	Water	31.1284	148
1189	Water	33.0909	33
1190	Water	39.207	487
1191	Water	25.5814	242
1192	Water	23.622	123
1193	Water	23.0469	115
1194	Water	33.0739	154
1195	Water	16.4286
1196	Water	19.7368	226
1197	Water	33.8346	265
1198	Water	24.7104	238
1199	Water	13.7931	86
1200	Water	32.3194	261
1201	Water	21.7857	203
1202	Water	30.2632	348
1203	Water	27.8195	197
1204	Water	17.7606	65
1205	Water	20.6897	168
1206	Water	37.6426	190
1207	Water	53.5714	386
1208	Water	51.7544	420
1209	Water	49.2481	596
1210	Water	45.9459	373
1211	Water	59.387	373
1212	Water	71.4829	555
1213	Water	27.4306	78
1214	Water	24.5833	185
1215	Water	35.206	312
1216	Water	25.283	210
1217	Water	23.3962	101
1218	Water	30.5019	176
1219	Water	24.6528	292
1220	Water	24.5833	380
1221	Water	35.5805	313
1222	Water	19.2453	266
1223	Water	18.8679	105
1224	Water	34.749	165
1225	Water	36.9338	129
1226	Water	25.5144	248
1227	Water	36.63	321
1228	Water	32.7068	292
1229	Water	22.1402	144
1230	Water	38.1132	200
1231	Water	28.223	226
1232	Water	23.8683	8
1233	Water	39.1941	345
1234	Water	26.3158	305
1235	Water	53.5055	115
1236	Water	36.6038	167
1237	Water	66.2021	551
1238	Water	56.7901	695
1239	Water	61.1722	659
1240	Water	55.2632	516
1241	Water	51.6605	323
1242	Water	62.2642	318
1243	Water	23.3898	257
1244	Water	19.6	175
1245	Water	25.1852	155
1246	Water	26.0073	126
1247	Water	13.5036	70
1248	Water	26.8939	172
1249	Water	30.5085	41
1250	Water	20.4	221
1251	Water	25.9259	79
1252	Water	24.1758	255
1253	Water	21.8978	95
1254	Water	29.9242	167
1255	Water	28.2828	152
1256	Water	18.1102	166
1257	Water	28	216
1258	Water	27.0073	172
1259	Water	15.2174	87
1260	Water	23.221	79
1261	Water	23.9057	158
1262	Water	8.66142	138
1263	Water	31.6364	226
1264	Water	28.4672	334
1265	Water	10.1449	67
1266	Water	35.9551	274
1267	Water	77.7778	380
1268	Water	42.9134	313
1269	Water	66.9091	518
1270	Water	67.1533	547
1271	Water	45.2899	261
1272	Water	75.6554	584
1273	Water	28.1457	136
1274	Water	5.5336	28
1275	Water	25.2747	200
1276	Water	20.0743	85
1277	Water	13.9785	74
1278	Water	33.8182	306
1279	Water	33.7748	176
1280	Water	5.5336	61
1281	Water	23.0769	163
1282	Water	28.2528	342
1283	Water	7.8853	73
1284	Water	32	154
1285	Water	33.4437	101
1286	Water	9.48617	76
1287	Water	21.6117	116
1288	Water	26.7658	169
1289	Water	5.37634	52
1290	Water	37.0909	140
1291	Water	32.2476	199
1292	Water	9.30233	30
1293	Water	18.1818	62
1294	Water	25	295
1295	Water	2.15827	18
1296	Water	30	150
1297	Water	62.5407	540
1298	Water	27.907	11
1299	Water	55.2727	542
1300	Water	59.058	250
1301	Water	27.3381	248
1302	Water	57.8571	329
1303	Water	15.8065	102
1304	Water	9.54198	19
1305	Water	14.0288	52
1306	Water	14.3369	18
1307	Water	13.9785	8
1308	Water	26.4706	14
1309	Water	38.3871	35
1310	Water	10.687	23
1311	Water	19.4245	130
1312	Water	30.4659	61
1313	Water	10.3943	43
1314	Water	26.1029	76
1315	Water	35.7143	225
1316	Water	8.52713	27
1317	Water	27.4368	318
1318	Water	17.5627	76
1319	Water	9.67742	103
1320	Water	31.6726	211
1321	Water	36.039	385
1322	Water	4.65116	171
1323	Water	28.8809	295
1324	Water	15.0538	16
1325	Water	8.24373	81
1326	Water	28.4698	128
1327	Water	63.5783	1046
1328	Water	35.4962	429
1329	Water	58.6572	635
1330	Water	58.8235
1331	Water	49.3056	140
1332	Water	75	239
