# Supplementary material for: The role of anterior insular cortex inputs to dorsolateral striatum in binge alcohol drinking
Source: eLife journal article supplement (doi:10.7554/elife.77411), 2022-07-28
Supplement: fig2-figsupp2-data1 [file Fig2S2B.xlsx]

## Sheet: Sheet1
	Fluid	Intake	Number of Drinks
510	Water	36.4035	78
511	Water	26.6968	70
512	Water	37.788	108
513	Water	29.5082	150
516	Water	26.3158	120
517	Water	28.0543	46
518	Water	34.5622	74
519	Water	27.0492	92
522	Water	34.4828	94
523	Water	25.3333	34
524	Water	32.8767	42
525	Water	18.595	51
528	Water	34.4828	83
529	Water	32	39
530	Water	30.137	36
531	Water	23.9669	47
534	Water	76.9874	129
535	Water	65.2174	97
536	Water	66.2222	74
537	Water	57.9365	111
540	Water	41.7021	76
541	Water	39.4737	58
542	Water	24.4344	20
543	Water	28.8	53
546	Water	31.9149	61
547	Water	32.4561	54
548	Water	20.8145	28
549	Water	34.8	61
552	Water	37.9167	54
553	Water	36.1702	67
554	Water	18.8341	16
555	Water	36.4341	56
558	Water	38.75	54
559	Water	39.5745	51
560	Water	25.5605	35
561	Water	45.3488	119
564	Water	80.1653	86
565	Water	51.6949	70
566	Water	58.6957	59
567	Water	56.705	138
570	Water	42.0408	43
571	Water	47.4359	73
572	Water	29.7778
573	Water	28.8973	58
576	Water	31.4286	36
577	Water	44.4444	63
578	Water	32.4444	32
579	Water	35.7414	83
582	Water	39.6761	80
583	Water	45.7983	61
584	Water	31.7181	36
585	Water	37.3585	81
588	Water	34.8178	36
589	Water	47.479	64
590	Water	34.3612
591	Water	27.5472	52
594	Water	73.1225	92
595	Water	72.428	116
596	Water	58.952	77
600	Water	30.4	41
601	Water	34.0336	50
602	Water	27.7056	25
603	Water	32.7138	63
606	Water	41.6	51
607	Water	41.5966	64
608	Water	32.4675	24
609	Water	33.0855	65
612	Water	39.4531	42
613	Water	32.2314	42
614	Water	31.6239	29
615	Water	29.5203	69
618	Water	30.4688	23
619	Water	27.686	37
620	Water	25.2137	30
621	Water	25.8303	80
624	Water	66.7969	78
625	Water	76.2097	68
626	Water	72.5738	96
627	Water	63.4686	197
630	Water	34.4961	49
631	Water	37.1429	43
632	Water	28.7554	17
633	Water	36.3636	96
636	Water	34.4961	51
637	Water	37.9592	53
638	Water	36.9099	36
639	Water	32.3636	93
642	Water	34.6154	34
643	Water	33.3333	37
644	Water	26.3598	29
645	Water	33.8129	71
648	Water	29.6154	48
649	Water	30.5221	31
650	Water	14.2259	12
651	Water	29.4964	67
654	Water	70.1887	134
655	Water	59.5238	93
656	Water	59.5918	87
657	Water	65.0177	164
660	Water	35.9073	53
661	Water	28.6853	44
662	Water	36.4017	3
663	Water	36.7857	69
666	Water	30.888	44
667	Water	32.6693	46
668	Water	29.7071	17
669	Water	34.6429	73
672	Water	26.616	44
673	Water	35.7143	42
674	Water	38.5542	58
675	Water	41.958	108
678	Water	31.1787	52
679	Water	32.5397	45
680	Water	26.506	46
681	Water	28.6713	64
684	Water	70.1107	159
685	Water	57.9767	93
686	Water	47.3469	16
687	Water	59.2982	162
690	Water	14.3411	56
691	Water	1.68067
692	Water	4.36508	55
693	Water	10.8696	12
694	Water	9.87654	47
695	Water	17.8295	54
696	Water	1.68067	32
697	Water	21.0317	30
698	Water	17.3913	50
699	Water	16.8724	56
700	Water	16.9231	9
701	Water	2.14592	28
702	Water	26.2357	76
703	Water	10.7296	48
704	Water	23.2653	54
705	Water	31.9231	42
706	Water	2.14592	41
707	Water	28.8973	78
708	Water	17.5966	40
709	Water	19.1837	40
710	Water	56.2264	30
711	Water	41.4634	203
712	Water	53.9623	99
713	Water	43.5146	101
714	Water	48.8189	92
715	Water	30.9434	75
716	Water	33.3333	210
717	Water	20.3065	45
718	Water	21.371	44
719	Water	21.2	56
720	Water	32.0755	71
721	Water	15.0407	40
722	Water	28.3525	44
723	Water	17.7419	44
724	Water	21.6	37
725	Water	38.2022
726	Water	29.0984	41
727	Water	36.3636
728	Water	11.5538	73
729	Water	28.7402	56
730	Water	23.5955	63
731	Water	21.3115
732	Water	26.5152	62
733	Water	7.17131	22
734	Water	22.4409	40
735	Water	66.2921	160
736	Water	45.9016
737	Water	55.303	105
738	Water	60.1594	107
739	Water	65.748	100
740	Water	28.7823
741	Water	13.9442
742	Water	34.5455	51
743	Water	18.7266	34
744	Water	33.7121	51
745	Water	27.6753	67
746	Water	17.9283
747	Water	38.1818	73
748	Water	22.4719	42
749	Water	32.197	41
750	Water	34.3173	50
751	Water	20.7031	71
752	Water	31.8021	54
753	Water	21.2687	65
754	Water	27.7154	41
755	Water	30.9963	63
756	Water	23.0469	35
757	Water	29.682	56
758	Water	26.1194	63
759	Water	31.8352	46
760	Water	61.6788	145
761	Water	62.6923	101
762	Water	55.516	107
763	Water	50.7299	172
764	Water	54.5788	90
765	Water	40.2174	67
766	Water	15.0579	26
767	Water	31.4488	39
768	Water	25.1825	65
769	Water	33.3333	34
770	Water	44.5652	74
771	Water	17.7606	29
772	Water	38.5159	61
773	Water	25.1825	69
774	Water	32.2464	57
775	Water	29.6029	64
776	Water	23.3962	54
777	Water	33.218	51
778	Water	17.9211	43
779	Water	30.8511	52
780	Water	33.935	72
781	Water	20.7547	53
782	Water	28.0277	45
783	Water	24.3728	47
784	Water	25.1773	42
785	Water	47.8723	124
786	Water	41.6974	65
787	Water	51.7123	63
788	Water	48.9209	89
789	Water	54.7703	79
790	Water	28.4173	58
791	Water	9.66543	23
792	Water	28.866	54
793	Water	16.0714	40
794	Water	21.2766	40
795	Water	33.4532	62
796	Water	17.1004	36
797	Water	31.9588	53
798	Water	21.4286	47
799	Water	29.4326	55
800	Water	26.9504
801	Water	18.0812	35
802	Water	33.7884	63
803	Water	22.1831	60
804	Water	31.4685	66
805	Water	28.7234	67
806	Water	88.9299	121
807	Water	30.7167	50
808	Water	21.4789	70
809	Water	29.021	69
810	Water	65.7343	50
811	Water	57.2954	111
812	Water	56.8106	116
813	Water	43.8596	115
814	Water	53.2646	149
815	Water	28.5714	53
816	Water	20.073	29
817	Water	29.3333	40
818	Water	9.18728	17
819	Water	25.1748	44
820	Water	36.0714
821	Water	25.1825	55
822	Water	37	64
823	Water	22.9682	42
824	Water	36.3636	60
825	Water	29.3706	89
826	Water	25.3623	44
827	Water	31.3725	46
828	Water	17.4216	103
829	Water	25.8621	47
830	Water	30.7692
831	Water	21.0145	35
832	Water	27.451	50
833	Water	14.6341	40
834	Water	27.2414	49
835	Water	64.5051	93
836	Water	45.4874	93
837	Water	56.8484	95
838	Water	48.5915	99
839	Water	60.3448	100
992	Water	3.11111	7
993	Water	1.84332	19
994	Water	3.39806	32
995	Water	2.46305	21
998	Water	1.77778	6
999	Water	1.38249	38
1000	Water	49.5146	13
1001	Water	17.2414	71
1004	Water	1.31004	10
1005	Water	3.65297	30
1006	Water	2.39234	3
1007	Water	13.4615	52
1010	Water	60.6987	217
1011	Water	71.2329	163
1012	Water	53.11	116
1013	Water	61.0577	174
1016	Water	58.5366	140
1017	Water	57.265	166
1018	Water	43.8356	90
1019	Water	48.1481	192
1022	Water	40.8907	43
1023	Water	30.9322	79
1024	Water	28.6996	37
1025	Water	20.8333	63
1028	Water	84.6154	144
1029	Water	87.7119	138
1030	Water	56.0538	69
1031	Water	71.2963	163
1034	Water	44.7876	62
1035	Water	30	52
1036	Water	31.441	42
1037	Water	32.1429	77
1040	Water	37.0656	35
1041	Water	37.0833	61
1042	Water	35.8079	61
1043	Water	28.125	51
1046	Water	64.6388	122
1047	Water	64.876	92
1048	Water	68.9362	123
1049	Water	62.7193	150
1052	Water	34.5865	39
1053	Water	51.2195	56
1054	Water	39.2241	73
1055	Water	33.6245	73
1058	Water	21.8045	60
1059	Water	43.0894	73
1060	Water	32.7586	40
1061	Water	30.5677	73
1064	Water	38.3459	87
1065	Water	38.5542	70
1066	Water	31.0638	38
1067	Water	22.9437	54
1070	Water	40.2256	75
1071	Water	45.3815	53
1072	Water	33.617	46
1073	Water	27.2727	60
1076	Water	50	84
1077	Water	76.1719	147
1078	Water	61.6034	54
1079	Water	61.6034	169
1082	Water	35.9551	66
1083	Water	32.3887	64
1084	Water	38.4937	37
1085	Water	18.1034	39
1088	Water	35.206	75
1089	Water	42.1053	83
1090	Water	36.8201	45
1091	Water	28.8793	73
1094	Water	31.5985	55
1095	Water	36.1446	71
1096	Water	37.5	40
1097	Water	80.4255	185
1100	Water	33.829	52
1101	Water	30.9237	41
1102	Water	40	51
1103	Water	24.2553	20
1106	Water	52.2222	113
1107	Water	61.5686	124
1108	Water	63.7097	38
1109	Water	66.2602	210
1112	Water	29.927	68
1113	Water	28.8538	60
1114	Water	31.8725	28
1115	Water	29.4606	54
1117	Water	26.2774	80
1118	Water	41.502	99
1119	Water	44.6215	51
1120	Water	29.8755	50
1121	Water	31.5217	79
1122	Water	34.1085	70
1123	Water	31.3253	41
1124	Water	22.7273	75
1125	Water	34.4203	79
1126	Water	34.8837	63
1127	Water	34.9398	46
1128	Water	24.3802	55
1129	Water	54.3478	111
1130	Water	54.9801	131
1131	Water	54.8	59
1132	Water	54.918	150
1133	Water	28.2686	52
1134	Water	27.0992	59
1135	Water	26.07	21
1136	Water	27.0492	69
1137	Water	27.5618	64
1138	Water	33.9695	66
1139	Water	34.2412	62
1140	Water	28.6885	88
1141	Water	32.7526	46
1142	Water	34.6008	87
1143	Water	36.4706	29
1144	Water	24.3902	72
1145	Water	28.5714	71
1146	Water	33.4601	89
1147	Water	33.7255	44
1148	Water	25.2033	27
1149	Water	46.8531	50
1150	Water	55.0943	169
1151	Water	49.2308	77
1152	Water	59.1093	188
1153	Water	20.1493	78
1154	Water	2.87081
1155	Water	2.81124	2
1156	Water	50.3968	11
1157	Water	26.5873	42
1158	Water	24.3902	59
1159	Water	19.7761	65
1160	Water	2.87081
1161	Water	3.21285	6
1162	Water	37.6984	34
1163	Water	26.9841	57
1164	Water	18.6992	51
1165	Water	14.1791	50
1166	Water	1.86047	2
1167	Water	16.9291	88
1168	Water	21.0317	63
1169	Water	20.7031	36
1170	Water	20.0803	46
1171	Water	19.403	57
1172	Water	5.11628
1173	Water	33.4646	53
1174	Water	21.8254	46
1175	Water	26.5625	42
1176	Water	32.5301	58
1177	Water	50.3731	131
1178	Water	33.9535	93
1179	Water	66.5354	99
1180	Water	44.4444	134
1181	Water	52.7344	72
1182	Water	72.6908	111
1183	Water	22.1818	98
1184	Water	25.1101	74
1185	Water	25.969	39
1186	Water	15.3543	49
1187	Water	23.4375	35
1188	Water	31.1284	37
1189	Water	33.0909	21
1190	Water	39.207	81
1191	Water	25.5814	46
1192	Water	23.622	41
1193	Water	23.0469	25
1194	Water	33.0739	44
1195	Water	16.4286
1196	Water	19.7368	34
1197	Water	33.8346	96
1198	Water	24.7104	66
1199	Water	13.7931	24
1200	Water	32.3194	55
1201	Water	21.7857	44
1202	Water	30.2632	51
1203	Water	27.8195	47
1204	Water	17.7606	19
1205	Water	20.6897	36
1206	Water	37.6426	56
1207	Water	53.5714	115
1208	Water	51.7544	82
1209	Water	49.2481	118
1210	Water	45.9459	80
1211	Water	59.387	73
1212	Water	71.4829	122
1213	Water	27.4306	40
1214	Water	24.5833	35
1215	Water	35.206	65
1216	Water	25.283	56
1217	Water	23.3962	24
1218	Water	30.5019	51
1219	Water	24.6528	54
1220	Water	24.5833	54
1221	Water	35.5805	71
1222	Water	19.2453	53
1223	Water	18.8679	30
1224	Water	34.749	40
1225	Water	36.9338	47
1226	Water	25.5144	42
1227	Water	36.63	65
1228	Water	32.7068	60
1229	Water	22.1402	34
1230	Water	38.1132	62
1231	Water	28.223	51
1232	Water	23.8683	6
1233	Water	39.1941	67
1234	Water	26.3158	62
1235	Water	53.5055	34
1236	Water	36.6038	51
1237	Water	66.2021	125
1238	Water	56.7901	100
1239	Water	61.1722	130
1240	Water	55.2632	128
1241	Water	51.6605	82
1242	Water	62.2642	87
1243	Water	23.3898	52
1244	Water	19.6	32
1245	Water	25.1852	50
1246	Water	26.0073	35
1247	Water	13.5036	23
1248	Water	26.8939	38
1249	Water	30.5085	27
1250	Water	20.4	40
1251	Water	25.9259	37
1252	Water	24.1758	59
1253	Water	21.8978	32
1254	Water	29.9242	55
1255	Water	28.2828	43
1256	Water	18.1102	35
1257	Water	28	64
1258	Water	27.0073	46
1259	Water	15.2174	27
1260	Water	23.221	24
1261	Water	23.9057	42
1262	Water	8.66142	32
1263	Water	31.6364	70
1264	Water	28.4672	65
1265	Water	10.1449	23
1266	Water	35.9551	54
1267	Water	77.7778	115
1268	Water	42.9134	73
1269	Water	66.9091	153
1270	Water	67.1533	129
1271	Water	45.2899	70
1272	Water	75.6554	121
1273	Water	28.1457	48
1274	Water	5.5336	8
1275	Water	25.2747	61
1276	Water	20.0743	58
1277	Water	13.9785	24
1278	Water	33.8182	58
1279	Water	33.7748	53
1280	Water	5.5336	11
1281	Water	23.0769	60
1282	Water	28.2528	79
1283	Water	7.8853	19
1284	Water	32	48
1285	Water	33.4437	44
1286	Water	9.48617	12
1287	Water	21.6117	48
1288	Water	26.7658	41
1289	Water	5.37634	17
1290	Water	37.0909	44
1291	Water	32.2476	52
1292	Water	9.30233	9
1293	Water	18.1818	32
1294	Water	25	56
1295	Water	2.15827	6
1296	Water	30	41
1297	Water	62.5407	121
1298	Water	27.907	2
1299	Water	55.2727	129
1300	Water	59.058	73
1301	Water	27.3381	61
1302	Water	57.8571	93
1303	Water	15.8065	30
1304	Water	9.54198	11
1305	Water	14.0288	22
1306	Water	14.3369	6
1307	Water	13.9785	5
1308	Water	26.4706	9
1309	Water	38.3871	24
1310	Water	10.687	15
1311	Water	19.4245	37
1312	Water	30.4659	26
1313	Water	10.3943	18
1314	Water	26.1029	41
1315	Water	35.7143	68
1316	Water	8.52713	18
1317	Water	27.4368	61
1318	Water	17.5627	25
1319	Water	9.67742	38
1320	Water	31.6726	67
1321	Water	36.039	91
1322	Water	4.65116	60
1323	Water	28.8809	70
1324	Water	15.0538	12
1325	Water	8.24373	36
1326	Water	28.4698	68
1327	Water	63.5783	205
1328	Water	35.4962	85
1329	Water	58.6572	152
1330	Water	58.8235
1331	Water	49.3056	70
1332	Water	75	127
