# Supplementary material for: The role of anterior insular cortex inputs to dorsolateral striatum in binge alcohol drinking
Source: eLife journal article supplement (doi:10.7554/elife.77411), 2022-07-28
Supplement: fig2-figsupp2-data1 [file Fig2S2C.xlsx]

## Sheet: Sheet1
	Fluid	Intake	Total Alcohol Lick Duration (s)
510	Water	36.4035	13.72
511	Water	26.6968	18.14
512	Water	37.788	30.57
513	Water	29.5082	88.41
516	Water	26.3158	52.89
517	Water	28.0543	20.84
518	Water	34.5622	22.96
519	Water	27.0492	56.61
522	Water	34.4828	36.72
523	Water	25.3333	12.09
524	Water	32.8767	8.35
525	Water	18.595	28.02
528	Water	34.4828	28.37
529	Water	32	11.67
530	Water	30.137	11.05
531	Water	23.9669	35
534	Water	76.9874	23.96
535	Water	65.2174	33.7
536	Water	66.2222	19.71
537	Water	57.9365	54.03
540	Water	41.7021	28.68
541	Water	39.4737	11.66
542	Water	24.4344	4.8
543	Water	28.8	51.07
546	Water	31.9149	10.3
547	Water	32.4561	11.25
548	Water	20.8145	5.53
549	Water	34.8	44.79
552	Water	37.9167	11.52
553	Water	36.1702	10.17
554	Water	18.8341	2.73
555	Water	36.4341	61.31
558	Water	38.75	7.36
559	Water	39.5745	10.32
560	Water	25.5605	2.93
561	Water	45.3488	93.66
564	Water	80.1653	11.01
565	Water	51.6949	9.39
566	Water	58.6957	6.98
567	Water	56.705	71.16
570	Water	42.0408	8.61
571	Water	47.4359	7.2
572	Water	29.7778
573	Water	28.8973	25.91
576	Water	31.4286	5.88
577	Water	44.4444	9.58
578	Water	32.4444	2.74
579	Water	35.7414	39.95
582	Water	39.6761	15.22
583	Water	45.7983	6.92
584	Water	31.7181	6.8
585	Water	37.3585	29.45
588	Water	34.8178	6.63
589	Water	47.479	9.16
590	Water	34.3612
591	Water	27.5472	10.72
594	Water	73.1225	12.74
595	Water	72.428	15.9
596	Water	58.952	6.7
600	Water	30.4	2.86
601	Water	34.0336	6.79
602	Water	27.7056	3.5
603	Water	32.7138	10.69
606	Water	41.6	3.85
607	Water	41.5966	10.16
608	Water	32.4675	4.25
609	Water	33.0855	14.96
612	Water	39.4531	12.24
613	Water	32.2314	3.68
614	Water	31.6239	4.26
615	Water	29.5203	15.52
618	Water	30.4688	3.15
619	Water	27.686	4.77
620	Water	25.2137	2.33
621	Water	25.8303	27.28
624	Water	66.7969	12.21
625	Water	76.2097	19.94
626	Water	72.5738	8.73
627	Water	63.4686	51.28
630	Water	34.4961	10.07
631	Water	37.1429	4.2
632	Water	28.7554	3.96
633	Water	36.3636	30.42
636	Water	34.4961	5.24
637	Water	37.9592	8.08
638	Water	36.9099	4
639	Water	32.3636	14.99
642	Water	34.6154	11.4
643	Water	33.3333	5.5
644	Water	26.3598	2.74
645	Water	33.8129	12.51
648	Water	29.6154	3.79
649	Water	30.5221	2.91
650	Water	14.2259	1.07
651	Water	29.4964	13.78
654	Water	70.1887	14.35
655	Water	59.5238	10.92
656	Water	59.5918	9.58
657	Water	65.0177	45.86
660	Water	35.9073	3.79
661	Water	28.6853	6.58
662	Water	36.4017	0.24
663	Water	36.7857	7.95
666	Water	30.888	5.8
667	Water	32.6693	4.35
668	Water	29.7071	2.07
669	Water	34.6429	7.91
672	Water	26.616	7.11
673	Water	35.7143	3.28
674	Water	38.5542	5.39
675	Water	41.958	14.66
678	Water	31.1787	8.47
679	Water	32.5397	7.26
680	Water	26.506	7.32
681	Water	28.6713	7.83
684	Water	70.1107	12.74
685	Water	57.9767	12.84
686	Water	47.3469	0.86
687	Water	59.2982	38.8
690	Water	14.3411	15.47
691	Water	1.68067
692	Water	4.36508	31.35
693	Water	10.8696	3.87
694	Water	9.87654	13.23
695	Water	17.8295	17.49
696	Water	1.68067	17.97
697	Water	21.0317	32.81
698	Water	17.3913	26.47
699	Water	16.8724	25.37
700	Water	16.9231	0.93
701	Water	2.14592	8.5
702	Water	26.2357	31.97
703	Water	10.7296	17.49
704	Water	23.2653	19.35
705	Water	31.9231	7.67
706	Water	2.14592	17.93
707	Water	28.8973	60.19
708	Water	17.5966	13.59
709	Water	19.1837	19.53
710	Water	56.2264	16.25
711	Water	41.4634	115.55
712	Water	53.9623	75.21
713	Water	43.5146	57.06
714	Water	48.8189	46.99
715	Water	30.9434	15.42
716	Water	33.3333	168.73
717	Water	20.3065	25.52
718	Water	21.371	11.21
719	Water	21.2	10.39
720	Water	32.0755	14.63
721	Water	15.0407	26.2
722	Water	28.3525	13.6
723	Water	17.7419	16.27
724	Water	21.6	12.44
725	Water	38.2022
726	Water	29.0984	17.93
727	Water	36.3636
728	Water	11.5538	19.09
729	Water	28.7402	10
730	Water	23.5955	12.74
731	Water	21.3115
732	Water	26.5152	48.84
733	Water	7.17131	4.81
734	Water	22.4409	9.95
735	Water	66.2921	27.95
736	Water	45.9016
737	Water	55.303	36.22
738	Water	60.1594	85.84
739	Water	65.748	12.8
740	Water	28.7823
741	Water	13.9442
742	Water	34.5455	46.23
743	Water	18.7266	26.26
744	Water	33.7121	4.19
745	Water	27.6753	10.71
746	Water	17.9283
747	Water	38.1818	21.2
748	Water	22.4719	25.66
749	Water	32.197	3.13
750	Water	34.3173	31.71
751	Water	20.7031	44.12
752	Water	31.8021	8.82
753	Water	21.2687	40.7
754	Water	27.7154	2.23
755	Water	30.9963	11.88
756	Water	23.0469	33.59
757	Water	29.682	9.5
758	Water	26.1194	36.23
759	Water	31.8352	2.05
760	Water	61.6788	26.7
761	Water	62.6923	114
762	Water	55.516	57.01
763	Water	50.7299	100.18
764	Water	54.5788	6.33
765	Water	40.2174	13.05
766	Water	15.0579	14.72
767	Water	31.4488	7.71
768	Water	25.1825	39.13
769	Water	33.3333	2.71
770	Water	44.5652	12.33
771	Water	17.7606	13.49
772	Water	38.5159	27.66
773	Water	25.1825	32.28
774	Water	32.2464	5.81
775	Water	29.6029	10.52
776	Water	23.3962	36.4
777	Water	33.218	15.09
778	Water	17.9211	22.32
779	Water	30.8511	9.67
780	Water	33.935	14.48
781	Water	20.7547	31.48
782	Water	28.0277	9.63
783	Water	24.3728	16
784	Water	25.1773	4.42
785	Water	47.8723	43.48
786	Water	41.6974	82.59
787	Water	51.7123	14.97
788	Water	48.9209	63.91
789	Water	54.7703	5.06
790	Water	28.4173	15.39
791	Water	9.66543	9.77
792	Water	28.866	12.02
793	Water	16.0714	20.14
794	Water	21.2766	5.26
795	Water	33.4532	13.51
796	Water	17.1004	22.66
797	Water	31.9588	12.43
798	Water	21.4286	30.66
799	Water	29.4326	8
800	Water	26.9504
801	Water	18.0812	32.27
802	Water	33.7884	28.28
803	Water	22.1831	25.14
804	Water	31.4685	7.54
805	Water	28.7234	12.15
806	Water	88.9299	84.75
807	Water	30.7167	7.95
808	Water	21.4789	32.01
809	Water	29.021	11.8
810	Water	65.7343	15.96
811	Water	57.2954	62.4
812	Water	56.8106	76.18
813	Water	43.8596	81.41
814	Water	53.2646	35.44
815	Water	28.5714	16.48
816	Water	20.073	18.64
817	Water	29.3333	9.76
818	Water	9.18728	14.81
819	Water	25.1748	8.01
820	Water	36.0714
821	Water	25.1825	42.66
822	Water	37	13.78
823	Water	22.9682	33.74
824	Water	36.3636	5.64
825	Water	29.3706	28.6
826	Water	25.3623	20.78
827	Water	31.3725	10.72
828	Water	17.4216	61.62
829	Water	25.8621	4.18
830	Water	30.7692
831	Water	21.0145	36.4
832	Water	27.451	10.13
833	Water	14.6341	28.78
834	Water	27.2414	3.88
835	Water	64.5051	30
836	Water	45.4874	69.63
837	Water	56.8484	14.29
838	Water	48.5915	71.94
839	Water	60.3448	23.53
992	Water	3.11111	0.94
993	Water	1.84332	2.15
994	Water	3.39806	9.65
995	Water	2.46305	4.28
998	Water	1.77778	0.61
999	Water	1.38249	20
1000	Water	49.5146	2.56
1001	Water	17.2414	14.42
1004	Water	1.31004	1.41
1005	Water	3.65297	5.2
1006	Water	2.39234	0.12
1007	Water	13.4615	9.61
1010	Water	60.6987	46.23
1011	Water	71.2329	38.47
1012	Water	53.11	72.71
1013	Water	61.0577	33.61
1016	Water	58.5366	42.26
1017	Water	57.265	47.96
1018	Water	43.8356	26.22
1019	Water	48.1481	46.89
1022	Water	40.8907	18.19
1023	Water	30.9322	18.51
1024	Water	28.6996	25.59
1025	Water	20.8333	8.84
1028	Water	84.6154	32.28
1029	Water	87.7119	27.66
1030	Water	56.0538	54.36
1031	Water	71.2963	23.56
1034	Water	44.7876	17.8
1035	Water	30	9.49
1036	Water	31.441	16.96
1037	Water	32.1429	9.13
1040	Water	37.0656	6.62
1041	Water	37.0833	5.52
1042	Water	35.8079	28.59
1043	Water	28.125	10.43
1046	Water	64.6388	29.47
1047	Water	64.876	12.63
1048	Water	68.9362	77.82
1049	Water	62.7193	27.57
1052	Water	34.5865	9.04
1053	Water	51.2195	11.85
1054	Water	39.2241	37.55
1055	Water	33.6245	5.9
1058	Water	21.8045	13.72
1059	Water	43.0894	11.77
1060	Water	32.7586	20.71
1061	Water	30.5677	5.72
1064	Water	38.3459	15.93
1065	Water	38.5542	9.16
1066	Water	31.0638	43.88
1067	Water	22.9437	12.3
1070	Water	40.2256	14.47
1071	Water	45.3815	10.14
1072	Water	33.617	36.71
1073	Water	27.2727	7.94
1076	Water	50	25.67
1077	Water	76.1719	27.41
1078	Water	61.6034	66.68
1079	Water	61.6034	29.76
1082	Water	35.9551	18.47
1083	Water	32.3887	9.64
1084	Water	38.4937	18.07
1085	Water	18.1034	11.16
1088	Water	35.206	15.89
1089	Water	42.1053	7.98
1090	Water	36.8201	37.48
1091	Water	28.8793	15.69
1094	Water	31.5985	19.51
1095	Water	36.1446	9.44
1096	Water	37.5	44.23
1097	Water	80.4255	28.16
1100	Water	33.829	9.59
1101	Water	30.9237	6.24
1102	Water	40	27.24
1103	Water	24.2553	6.76
1106	Water	52.2222	30.95
1107	Water	61.5686	14.17
1108	Water	63.7097	41.64
1109	Water	66.2602	33.49
1112	Water	29.927	10.62
1113	Water	28.8538	10.3
1114	Water	31.8725	12.74
1115	Water	29.4606	13.09
1117	Water	26.2774	23.21
1118	Water	41.502	19.78
1119	Water	44.6215	49.57
1120	Water	29.8755	18.93
1121	Water	31.5217	15.59
1122	Water	34.1085	11.08
1123	Water	31.3253	32.1
1124	Water	22.7273	13.41
1125	Water	34.4203	13.7
1126	Water	34.8837	9.17
1127	Water	34.9398	27.2
1128	Water	24.3802	9.85
1129	Water	54.3478	26.38
1130	Water	54.9801	16.79
1131	Water	54.8	78.89
1132	Water	54.918	17.3
1133	Water	28.2686	14.21
1134	Water	27.0992	5.84
1135	Water	26.07	23.5
1136	Water	27.0492	10.2
1137	Water	27.5618	16.29
1138	Water	33.9695	7.92
1139	Water	34.2412	34.29
1140	Water	28.6885	12.3
1141	Water	32.7526	15.92
1142	Water	34.6008	16.73
1143	Water	36.4706	37.23
1144	Water	24.3902	8.96
1145	Water	28.5714	9.39
1146	Water	33.4601	13.95
1147	Water	33.7255	44.3
1148	Water	25.2033	7.13
1149	Water	46.8531	15.71
1150	Water	55.0943	25
1151	Water	49.2308	50.36
1152	Water	59.1093	28.18
1153	Water	20.1493	38.17
1154	Water	2.87081
1155	Water	2.81124	0.03
1156	Water	50.3968	2.55
1157	Water	26.5873	21.48
1158	Water	24.3902	17.73
1159	Water	19.7761	40.46
1160	Water	2.87081
1161	Water	3.21285	1.65
1162	Water	37.6984	11.37
1163	Water	26.9841	26.64
1164	Water	18.6992	25.45
1165	Water	14.1791	24.61
1166	Water	1.86047	0.06
1167	Water	16.9291	79.39
1168	Water	21.0317	16.4
1169	Water	20.7031	7.47
1170	Water	20.0803	17.71
1171	Water	19.403	29.25
1172	Water	5.11628
1173	Water	33.4646	59.14
1174	Water	21.8254	42.26
1175	Water	26.5625	6.91
1176	Water	32.5301	29.72
1177	Water	50.3731	55.52
1178	Water	33.9535	19.41
1179	Water	66.5354	110.39
1180	Water	44.4444	61.92
1181	Water	52.7344	8.6
1182	Water	72.6908	56.44
1183	Water	22.1818	46.13
1184	Water	25.1101	34.47
1185	Water	25.969	25.81
1186	Water	15.3543	32.62
1187	Water	23.4375	10.76
1188	Water	31.1284	14.6
1189	Water	33.0909	14.54
1190	Water	39.207	24.92
1191	Water	25.5814	24.48
1192	Water	23.622	23.38
1193	Water	23.0469	5.18
1194	Water	33.0739	16.58
1195	Water	16.4286
1196	Water	19.7368	10.94
1197	Water	33.8346	46.04
1198	Water	24.7104	48.29
1199	Water	13.7931	8.56
1200	Water	32.3194	28.44
1201	Water	21.7857	7
1202	Water	30.2632	18.96
1203	Water	27.8195	40.18
1204	Water	17.7606	23.02
1205	Water	20.6897	12.13
1206	Water	37.6426	35.22
1207	Water	53.5714	22.35
1208	Water	51.7544	25.13
1209	Water	49.2481	76.49
1210	Water	45.9459	50.1
1211	Water	59.387	16.6
1212	Water	71.4829	48.63
1213	Water	27.4306	7.77
1214	Water	24.5833	13.45
1215	Water	35.206	54.03
1216	Water	25.283	53.76
1217	Water	23.3962	4.13
1218	Water	30.5019	25.4
1219	Water	24.6528	9.12
1220	Water	24.5833	21.93
1221	Water	35.5805	50.85
1222	Water	19.2453	43.39
1223	Water	18.8679	8.23
1224	Water	34.749	36.76
1225	Water	36.9338	14.76
1226	Water	25.5144	17.76
1227	Water	36.63	28.67
1228	Water	32.7068	30.61
1229	Water	22.1402	3.92
1230	Water	38.1132	35.54
1231	Water	28.223	15.59
1232	Water	23.8683	1.19
1233	Water	39.1941	34.96
1234	Water	26.3158	57.64
1235	Water	53.5055	9.69
1236	Water	36.6038	46.29
1237	Water	66.2021	29.17
1238	Water	56.7901	35.79
1239	Water	61.1722	74.2
1240	Water	55.2632	116.5
1241	Water	51.6605	11.53
1242	Water	62.2642	63.38
1243	Water	23.3898	11.21
1244	Water	19.6	6.94
1245	Water	25.1852	25.58
1246	Water	26.0073	23.53
1247	Water	13.5036	3.02
1248	Water	26.8939	24.24
1249	Water	30.5085	4.17
1250	Water	20.4	12.28
1251	Water	25.9259	18.14
1252	Water	24.1758	40.67
1253	Water	21.8978	4.32
1254	Water	29.9242	29.69
1255	Water	28.2828	5.77
1256	Water	18.1102	5.76
1257	Water	28	19.09
1258	Water	27.0073	29.66
1259	Water	15.2174	6.07
1260	Water	23.221	14.52
1261	Water	23.9057	6.43
1262	Water	8.66142	9.96
1263	Water	31.6364	20.23
1264	Water	28.4672	29.92
1265	Water	10.1449	2.02
1266	Water	35.9551	23.05
1267	Water	77.7778	26.13
1268	Water	42.9134	50.71
1269	Water	66.9091	44.22
1270	Water	67.1533	131.45
1271	Water	45.2899	9.38
1272	Water	75.6554	70.4
1273	Water	28.1457	7.8
1274	Water	5.5336	1.74
1275	Water	25.2747	13.31
1276	Water	20.0743	19.64
1277	Water	13.9785	4.62
1278	Water	33.8182	18.72
1279	Water	33.7748	7.78
1280	Water	5.5336	2.19
1281	Water	23.0769	17.53
1282	Water	28.2528	44.36
1283	Water	7.8853	5.41
1284	Water	32	37.71
1285	Water	33.4437	6.63
1286	Water	9.48617	2.95
1287	Water	21.6117	12.34
1288	Water	26.7658	37.45
1289	Water	5.37634	4.6
1290	Water	37.0909	41.93
1291	Water	32.2476	7.96
1292	Water	9.30233	5.35
1293	Water	18.1818	14.01
1294	Water	25	36.85
1295	Water	2.15827	3.92
1296	Water	30	26.36
1297	Water	62.5407	23.19
1298	Water	27.907	1.05
1299	Water	55.2727	14.37
1300	Water	59.058	53.34
1301	Water	27.3381	23.96
1302	Water	57.8571	80.3
1303	Water	15.8065	6.43
1304	Water	9.54198	5.65
1305	Water	14.0288	2.96
1306	Water	14.3369	1.19
1307	Water	13.9785	1.51
1308	Water	26.4706	1.27
1309	Water	38.3871	7.35
1310	Water	10.687	23.88
1311	Water	19.4245	5.6
1312	Water	30.4659	23.29
1313	Water	10.3943	6.7
1314	Water	26.1029	25.73
1315	Water	35.7143	15.21
1316	Water	8.52713	15.95
1317	Water	27.4368	21.59
1318	Water	17.5627	21.98
1319	Water	9.67742	18.1
1320	Water	31.6726	37.99
1321	Water	36.039	10.57
1322	Water	4.65116	33.95
1323	Water	28.8809	25.87
1324	Water	15.0538	30.91
1325	Water	8.24373	13.96
1326	Water	28.4698	54.29
1327	Water	63.5783	56.13
1328	Water	35.4962	21.32
1329	Water	58.6572	49.65
1330	Water	58.8235
1331	Water	49.3056	24.41
1332	Water	75	134.23
