# Supplementary material for: The role of anterior insular cortex inputs to dorsolateral striatum in binge alcohol drinking
Source: eLife journal article supplement (doi:10.7554/elife.77411), 2022-07-28
Supplement: fig2-figsupp2-data1 [file Fig2S2D.xlsx]

## Sheet: Sheet1
	Fluid	Intake	Total Alcohol Licks
0	Alcohol	0	0
1	Alcohol	1.96112	171
3	Alcohol	0	0
4	Alcohol	3.07334	461
5	Alcohol	0	0
6	Alcohol	0	0
7	Alcohol	1.96112	335
9	Alcohol	0	0
10	Alcohol	1.53667	217
11	Alcohol	4.05297	666
12	Alcohol	0	0
13	Alcohol	2.66862	212
15	Alcohol	0	0
16	Alcohol	2.30501	456
17	Alcohol	3.82356	625
18	Alcohol	2.13314	372
19	Alcohol	2.66862	209
21	Alcohol	0	0
22	Alcohol	3.84168	615
23	Alcohol	5.35298	869
24	Alcohol	2.93428	279
25	Alcohol	7.21987	829
27	Alcohol	0.743664	3
28	Alcohol	3.13273	404
29	Alcohol	5.42982	415
30	Alcohol	2.12383	191
31	Alcohol	1.33983	35
33	Alcohol	0.730265	12
34	Alcohol	2.21071	272
35	Alcohol	2.97466	254
36	Alcohol	2.83177	322
37	Alcohol	1.33983	61
39	Alcohol	0.730265	1
40	Alcohol	2.94762	208
41	Alcohol	2.97466	165
42	Alcohol	3.47895	365
43	Alcohol	2.61482	173
45	Alcohol	4.1392	268
46	Alcohol	3.66785	289
47	Alcohol	7.07943	529
48	Alcohol	2.78316	289
49	Alcohol	1.96112	186
51	Alcohol	3.44934	621
52	Alcohol	3.66785	293
53	Alcohol	6.37148	315
54	Alcohol	4.06993	435
55	Alcohol	3.20393	321
57	Alcohol	2.70198	307
58	Alcohol	5.11186	494
59	Alcohol	7.1418	488
60	Alcohol	2.0696	222
61	Alcohol	3.19132	259
63	Alcohol	3.39161	215
64	Alcohol	3.61872	299
65	Alcohol	4.22919	225
66	Alcohol	2.75947	340
67	Alcohol	4.46784	365
69	Alcohol	4.74825	574.1
70	Alcohol	3.61872	317
71	Alcohol	4.93405	255
72	Alcohol	4.01948	365
73	Alcohol	4.39857	302
75	Alcohol	5.22964	381
76	Alcohol	2.84419	264
77	Alcohol	3.52432	218
78	Alcohol	2.67965	359
79	Alcohol	3.14184	404
81	Alcohol	4.57594	546
82	Alcohol	4.26629	363
83	Alcohol	6.34378	428
84	Alcohol	2.06083	227
85	Alcohol	0.640786	42
87	Alcohol	5.20864	574
88	Alcohol	5.0437	383
89	Alcohol	4.87052	343
90	Alcohol	1.32884	110
91	Alcohol	1.21894	82
93	Alcohol	4.5033	511
94	Alcohol	2.12383	293
95	Alcohol	3.44934	131
96	Alcohol	2.65769	229
97	Alcohol	1.21894	105
99	Alcohol	2.57332	354
100	Alcohol	2.83177	268
101	Alcohol	3.44934	259
102	Alcohol	3.93811	347
103	Alcohol	1.80132	182
105	Alcohol	3.82958	360
106	Alcohol	2.73618	302
107	Alcohol	3.39161	128
108	Alcohol	1.96905	227
109	Alcohol	2.40176	205
111	Alcohol	3.19132	505
112	Alcohol	2.73618	196
113	Alcohol	4.74825	264
114	Alcohol	5.83628	430
115	Alcohol	4.21871	353
117	Alcohol	3.90648	475
118	Alcohol	4.21088	368
119	Alcohol	6.07946	324
120	Alcohol	2.62541	133
121	Alcohol	2.3841	270
123	Alcohol	3.15406	327
124	Alcohol	3.46408	268
125	Alcohol	2.69077	110
126	Alcohol	2.62541	237
127	Alcohol	2.3841	247
129	Alcohol	3.15406	328
130	Alcohol	3.46408	305
131	Alcohol	2.69077	114
132	Alcohol	1.97706	146
133	Alcohol	1.17477	223
135	Alcohol	4.95019	477
136	Alcohol	2.02649	266
137	Alcohol	2.00974	102
138	Alcohol	3.2951	175
139	Alcohol	2.34955	362
141	Alcohol	1.85632	167
142	Alcohol	2.70198	293
143	Alcohol	0.334956	1
144	Alcohol	3.36346	158
145	Alcohol	2.91581	265
147	Alcohol	4.25031	459
148	Alcohol	3.40586	367
149	Alcohol	7.33871	255
150	Alcohol	2.63608	262
151	Alcohol	2.84419	349
153	Alcohol	4.21871	374
154	Alcohol	4.10427	333
155	Alcohol	2.00974	94
156	Alcohol	3.2951	221
157	Alcohol	2.27535	253
159	Alcohol	3.01336	431
160	Alcohol	4.10427	307
161	Alcohol	2.67965	148
162	Alcohol	3.26853	411
163	Alcohol	3.42505	247
165	Alcohol	3.01336	357
166	Alcohol	4.01948	367
167	Alcohol	2.65769	203
168	Alcohol	0.653705	2
169	Alcohol	2.28336	292
171	Alcohol	1.80802	240
172	Alcohol	2.67965	291
173	Alcohol	1.32884	104
174	Alcohol	3.30855	431
175	Alcohol	4.01001	413
177	Alcohol	3.62953	377
178	Alcohol	6.02921	544
179	Alcohol	4.01948	220
180	Alcohol	0.686944	8
182	Alcohol	0	0
184	Alcohol	1.38563	322
185	Alcohol	2.61039	506
187	Alcohol	2.84697	714
189	Alcohol	1.73204	239
190	Alcohol	1.749	225
192	Alcohol	3.77207	812
194	Alcohol	3.25623	447
195	Alcohol	2.55623	305
197	Alcohol	2.16694	379
199	Alcohol	2.07845	400
200	Alcohol	2.71301	272
202	Alcohol	3.43404	461
204	Alcohol	4.91672	460
205	Alcohol	4.05297	427
207	Alcohol	2.07451	465
209	Alcohol	2.4741	357
210	Alcohol	1.43413	211
212	Alcohol	3.68801	546
214	Alcohol	2.60432	348
215	Alcohol	2.90824	262
217	Alcohol	3.51767	422
219	Alcohol	3.79564	383
220	Alcohol	3.03199	244
222	Alcohol	3.74709	455
224	Alcohol	2.50898	345
225	Alcohol	4.64081	397
227	Alcohol	5.4291	574
229	Alcohol	3.75099	381
230	Alcohol	3.35006	245
232	Alcohol	3.25718	269
234	Alcohol	2.27093	208
235	Alcohol	4.06793	399
237	Alcohol	4.1455
239	Alcohol	1.64011	207
240	Alcohol	2.89921	274
242	Alcohol	3.81456	406
244	Alcohol	2.39494	292
245	Alcohol	3.01754	369
247	Alcohol	4.32806	241
249	Alcohol	2.45635	250
250	Alcohol	4.9109	343
252	Alcohol	5.47799	336
254	Alcohol	4.14723	469
255	Alcohol	3.6156	229
257	Alcohol	4.08884	244
259	Alcohol	2.62072	306
260	Alcohol	3.2657	249
262	Alcohol	4.37577	427
264	Alcohol	3.65682	430
265	Alcohol	3.60264	242
267	Alcohol	4.40849	9
269	Alcohol	3.35006	348
270	Alcohol	2.90536	279
272	Alcohol	4.4796	438
274	Alcohol	1.97414	267
275	Alcohol	5.58018	390
277	Alcohol	5.11575	254
279	Alcohol	3.30242	404
280	Alcohol	2.34955	125
282	Alcohol	3.60264	177
284	Alcohol	3.84589	453
285	Alcohol	2.64324
287	Alcohol	3.74675	392
289	Alcohol	2.3667	323
290	Alcohol	2.51665	263
292	Alcohol	4.07115	236
294	Alcohol	4.24739	551
295	Alcohol	3.27749	187
297	Alcohol	3.78035	125
299	Alcohol	3.35006	339
300	Alcohol	5.3242	412
302	Alcohol	6.82606	567
304	Alcohol	4.54651	545
305	Alcohol	1.93838	132
307	Alcohol	2.66689	249
309	Alcohol	4.18371	499
310	Alcohol	2.70198	231
312	Alcohol	4.1407	349
314	Alcohol	3.31211	475
315	Alcohol	2.95796	53
317	Alcohol	3.94724	169
319	Alcohol	3.12658	292
320	Alcohol	2.90107	104
322	Alcohol	3.45384	299
324	Alcohol	3.01078	414
325	Alcohol	5.05903	279
327	Alcohol	5.93286	110
329	Alcohol	5.11343	559
330	Alcohol	0	0
331	Alcohol	2.25735	831
332	Alcohol	0	0
333	Alcohol	0	0
334	Alcohol	0	0
335	Alcohol	0	0
336	Alcohol	0	0
337	Alcohol	3.62544	623
338	Alcohol	0
339	Alcohol	1.40682	219
340	Alcohol	0	0
341	Alcohol	0	0
342	Alcohol	0.148733	52
343	Alcohol	3.22892	532
344	Alcohol	0	0
345	Alcohol	1.81573	826
346	Alcohol	0	0
347	Alcohol	0	0
348	Alcohol	0.743664	161
349	Alcohol	2.21988	473
350	Alcohol	0	0
351	Alcohol	3.30722	647
352	Alcohol	0	0
353	Alcohol	0	0
354	Alcohol	3.92342	764
355	Alcohol	5.18249	640
356	Alcohol	0	0
357	Alcohol	5.14966	976
358	Alcohol	0.213314	9
359	Alcohol	0	0
360	Alcohol	0.363495	22
361	Alcohol	3.33209	141
362	Alcohol	0	0
363	Alcohol	2.76482	364
364	Alcohol	3.67192	955
365	Alcohol	0	0
366	Alcohol	0.363495	256
367	Alcohol	3.20393	352
368	Alcohol	2.98066	390
369	Alcohol	3.14184	370
370	Alcohol	2.49414	409
371	Alcohol	0	0
372	Alcohol	1.76216	283
373	Alcohol	3.21714	268
374	Alcohol	2.81006	601
375	Alcohol	2.9764	219
376	Alcohol	3.36603	966
377	Alcohol	0.0684046	8
378	Alcohol	2.46703	355
379	Alcohol	3.28023	218
380	Alcohol	2.88211	585
381	Alcohol	2.40645	187
382	Alcohol	3.7095	377
383	Alcohol	2.87299	453
384	Alcohol	3.3687	416
385	Alcohol	3.6381	133
386	Alcohol	3.96448	451
387	Alcohol	3.76017	221
388	Alcohol	5.27053	378
389	Alcohol	6.09678	1169
390	Alcohol	1.87863	183
391	Alcohol	2.46017	197
392	Alcohol	2.73707	407
393	Alcohol	3.04361	232
394	Alcohol	3.47866	334
395	Alcohol	1.9754	345
396	Alcohol	0.765368	65
397	Alcohol	2.77558	256
398	Alcohol	3.0178	448
399	Alcohol	2.60881	138
400	Alcohol	3.80684	281
401	Alcohol	3.13339	377
402	Alcohol	1.60721	150
403	Alcohol	3.46947	328
404	Alcohol	3.74644	215
405	Alcohol	2.99767	372
406	Alcohol	4.03643	591
407	Alcohol	4.13637	249
408	Alcohol	1.95661	118
409	Alcohol	2.58633	81
410	Alcohol	3.67833	410
411	Alcohol	2.93649	329
412	Alcohol	1.65427	176
413	Alcohol	3.33578	108
414	Alcohol	4.82907	487
415	Alcohol	4.69456	474
416	Alcohol	4.39644	393
417	Alcohol	5.01651	561
418	Alcohol	4.15182	397
419	Alcohol	4.57594	128
420	Alcohol	1.46746	65
421	Alcohol	2.71225	138
422	Alcohol	3.32551	261
423	Alcohol	3.5824	211
424	Alcohol	3.13778	307
425	Alcohol	2.77733	170
426	Alcohol	3.35418	191
427	Alcohol	3.88346	506
428	Alcohol	2.97911	238
429	Alcohol	2.42875	156
430	Alcohol	3.59538	297
431	Alcohol	3.87535	182
432	Alcohol	3.66294	158
433	Alcohol	4.25031	370
434	Alcohol	3.44934	266
435	Alcohol	3.40025	245
436	Alcohol	3.64605	233
437	Alcohol	3.38561	122
438	Alcohol	4.20559	330
439	Alcohol	4.5539	301
440	Alcohol	3.86326	246
441	Alcohol	3.33953	234
442	Alcohol	2.92986	222
443	Alcohol	3.2554	139
444	Alcohol	4.55313	385
445	Alcohol	4.12887	485
446	Alcohol	3.76225	249
447	Alcohol	4.20534	239
448	Alcohol	3.84472	555
449	Alcohol	3.39319	295
450	Alcohol	3.0098	222
451	Alcohol	3.6763	414
452	Alcohol	1.53074	157
453	Alcohol	3.23041	181
454	Alcohol	3.19132	379
455	Alcohol	3.71265	174
456	Alcohol	3.55704	270
457	Alcohol	3.43523	104
458	Alcohol	4.17473	334
459	Alcohol	2.81166	175
460	Alcohol	2.99984	350
461	Alcohol	2.59885	91
462	Alcohol	2.75804	259
463	Alcohol	3.19416	55
464	Alcohol	1.98513	192
465	Alcohol	3.81456	197
466	Alcohol	2.18237	187
467	Alcohol	2.41069	140
468	Alcohol	3.43073	174
469	Alcohol	4.09817	581
470	Alcohol	3.17621	204
471	Alcohol	2.80132	122
472	Alcohol	2.93061	246
473	Alcohol	2.47096	122
474	Alcohol	5.63007	437
475	Alcohol	4.82138	631
476	Alcohol	3.88268	310
477	Alcohol	5.67709	369
478	Alcohol	4.69456	495
479	Alcohol	4.70084	291
480	Alcohol	3.0816	227
481	Alcohol	3.49088	321
482	Alcohol	3.40249	265
483	Alcohol	2.7217	138
484	Alcohol	3.15575	551
485	Alcohol	3.57615	237
486	Alcohol	2.67965	172
487	Alcohol	3.07671	430
488	Alcohol	3.93622	310
489	Alcohol	3.55005	205
490	Alcohol	3.40326	401
491	Alcohol	2.3841	118
492	Alcohol	2.93549	187
493	Alcohol	3.95128	453
494	Alcohol	2.77918	213
495	Alcohol	3.20675	224
496	Alcohol	3.15575	530
497	Alcohol	2.7739	116
498	Alcohol	3.53593	179
499	Alcohol	3.48643	477
500	Alcohol	2.91152	281
501	Alcohol	3.7412	224
502	Alcohol	3.21763	340
503	Alcohol	3.14375	207
504	Alcohol	4.63197	444
505	Alcohol	5.02923	108
506	Alcohol	3.98542	400
507	Alcohol	4.65723	356
508	Alcohol	4.88832	512
509	Alcohol	4.25031	144
514	Alcohol	2.85274	492
515	Alcohol	2.01679	187
520	Alcohol	3.13105	486
521	Alcohol	2.40463	362
526	Alcohol	2.7928	399
527	Alcohol	3.88172	283
532	Alcohol	3.47398	421
533	Alcohol	2.66392	155
538	Alcohol	1.77105	256
539	Alcohol	7.02266	379
544	Alcohol	2.5145	215
545	Alcohol	3.46345	179
550	Alcohol	0.463197	73
551	Alcohol	4.05297	200
556	Alcohol	2.28797	206
557	Alcohol	3.8704	231
562	Alcohol	1.04593	148
563	Alcohol	3.21317	284
568	Alcohol	3.43692	433
569	Alcohol	5.42777	436
574	Alcohol	2.4741	272
575	Alcohol	4.22919	280
580	Alcohol	1.10684	92
581	Alcohol	4.08821	205
586	Alcohol	1.15341	97
587	Alcohol	3.6337	226
592	Alcohol	1.40973	147
593	Alcohol	3.77346	194
598	Alcohol	4.73992	439
599	Alcohol	4.58827	162
604	Alcohol	1.32988	39
605	Alcohol	2.56342	118
610	Alcohol	1.32988	130
611	Alcohol	3.87977	207
616	Alcohol	1.8437	195
617	Alcohol	3.25594	211
622	Alcohol	1.46225	95
623	Alcohol	3.05245	204
628	Alcohol	3.73633	316
629	Alcohol	6.4172	71
634	Alcohol	1.97086	18
635	Alcohol	4.12052	124
640	Alcohol	1.90728	22
641	Alcohol	3.44503	232
646	Alcohol	2.46017	176
647	Alcohol	3.11004	210
652	Alcohol	1.38779	141
653	Alcohol	3.97026	294
658	Alcohol	4.34802	312
659	Alcohol	5.51335	392
664	Alcohol	2.17401	278
665	Alcohol	4.33192	286
670	Alcohol	2.60881	180
671	Alcohol	3.67557	218
676	Alcohol	3.05885	127
677	Alcohol	3.58788	202
682	Alcohol	2.50825	204
683	Alcohol	3.65432	411
688	Alcohol	5.23958	398
689	Alcohol	6.29718	402
