# Supplementary material for: The role of anterior insular cortex inputs to dorsolateral striatum in binge alcohol drinking
Source: eLife journal article supplement (doi:10.7554/elife.77411), 2022-07-28
Supplement: fig2-figsupp2-data1 [file Fig2S2E.xlsx]

## Sheet: Sheet1
	Fluid	Intake	Number of Drinks
0	Alcohol	0	0
1	Alcohol	1.96112	36
3	Alcohol	0	0
4	Alcohol	3.07334	57
5	Alcohol	0	0
6	Alcohol	0	0
7	Alcohol	1.96112	57
9	Alcohol	0	0
10	Alcohol	1.53667	26
11	Alcohol	4.05297	85
12	Alcohol	0	0
13	Alcohol	2.66862	19
15	Alcohol	0	0
16	Alcohol	2.30501	60
17	Alcohol	3.82356	88
18	Alcohol	2.13314	46
19	Alcohol	2.66862	18
21	Alcohol	0	0
22	Alcohol	3.84168	62
23	Alcohol	5.35298	82
24	Alcohol	2.93428	32
25	Alcohol	7.21987	63
27	Alcohol	0.743664	2
28	Alcohol	3.13273	41
29	Alcohol	5.42982	35
30	Alcohol	2.12383	16
31	Alcohol	1.33983	8
33	Alcohol	0.730265	3
34	Alcohol	2.21071	34
35	Alcohol	2.97466	29
36	Alcohol	2.83177	24
37	Alcohol	1.33983	10
39	Alcohol	0.730265	1
40	Alcohol	2.94762	20
41	Alcohol	2.97466	21
42	Alcohol	3.47895	42
43	Alcohol	2.61482	15
45	Alcohol	4.1392	50
46	Alcohol	3.66785	23
47	Alcohol	7.07943	40
48	Alcohol	2.78316	31
49	Alcohol	1.96112	17
51	Alcohol	3.44934	90
52	Alcohol	3.66785	36
53	Alcohol	6.37148	25
54	Alcohol	4.06993	67
55	Alcohol	3.20393	23
57	Alcohol	2.70198	31
58	Alcohol	5.11186	62
59	Alcohol	7.1418	31
60	Alcohol	2.0696	28
61	Alcohol	3.19132	19
63	Alcohol	3.39161	28
64	Alcohol	3.61872	33
65	Alcohol	4.22919	16
66	Alcohol	2.75947	21
67	Alcohol	4.46784	28
69	Alcohol	4.74825	85
70	Alcohol	3.61872	32
71	Alcohol	4.93405	24
72	Alcohol	4.01948	27
73	Alcohol	4.39857	37
75	Alcohol	5.22964	22
76	Alcohol	2.84419	24
77	Alcohol	3.52432	20
78	Alcohol	2.67965	31
79	Alcohol	3.14184	31
81	Alcohol	4.57594	25
82	Alcohol	4.26629	33
83	Alcohol	6.34378	21
84	Alcohol	2.06083	16
85	Alcohol	0.640786	7
87	Alcohol	5.20864	23
88	Alcohol	5.0437	34
89	Alcohol	4.87052	27
90	Alcohol	1.32884	10
91	Alcohol	1.21894	6
93	Alcohol	4.5033	23
94	Alcohol	2.12383	34
95	Alcohol	3.44934	19
96	Alcohol	2.65769	12
97	Alcohol	1.21894	10
99	Alcohol	2.57332	15
100	Alcohol	2.83177	23
101	Alcohol	3.44934	14
102	Alcohol	3.93811	34
103	Alcohol	1.80132	15
105	Alcohol	3.82958	20
106	Alcohol	2.73618	34
107	Alcohol	3.39161	12
108	Alcohol	1.96905	21
109	Alcohol	2.40176	11
111	Alcohol	3.19132	20
112	Alcohol	2.73618	18
113	Alcohol	4.74825	18
114	Alcohol	5.83628	33
115	Alcohol	4.21871	30
117	Alcohol	3.90648	20
118	Alcohol	4.21088	38
119	Alcohol	6.07946	30
120	Alcohol	2.62541	16
121	Alcohol	2.3841	18
123	Alcohol	3.15406	14
124	Alcohol	3.46408	23
125	Alcohol	2.69077	12
126	Alcohol	2.62541	15
127	Alcohol	2.3841	12
129	Alcohol	3.15406	15
130	Alcohol	3.46408	23
131	Alcohol	2.69077	9
132	Alcohol	1.97706	14
133	Alcohol	1.17477	13
135	Alcohol	4.95019	21
136	Alcohol	2.02649	18
137	Alcohol	2.00974	8
138	Alcohol	3.2951	18
139	Alcohol	2.34955	20
141	Alcohol	1.85632	7
142	Alcohol	2.70198	17
143	Alcohol	0.334956	1
144	Alcohol	3.36346	26
145	Alcohol	2.91581	19
147	Alcohol	4.25031	17
148	Alcohol	3.40586	32
149	Alcohol	7.33871	30
150	Alcohol	2.63608	26
151	Alcohol	2.84419	17
153	Alcohol	4.21871	17
154	Alcohol	4.10427	29
155	Alcohol	2.00974	9
156	Alcohol	3.2951	20
157	Alcohol	2.27535	13
159	Alcohol	3.01336	15
160	Alcohol	4.10427	21
161	Alcohol	2.67965	14
162	Alcohol	3.26853	25
163	Alcohol	3.42505	14
165	Alcohol	3.01336	13
166	Alcohol	4.01948	23
167	Alcohol	2.65769	15
168	Alcohol	0.653705	2
169	Alcohol	2.28336	20
171	Alcohol	1.80802	11
172	Alcohol	2.67965	19
173	Alcohol	1.32884	13
174	Alcohol	3.30855	28
175	Alcohol	4.01001	19
177	Alcohol	3.62953	16
178	Alcohol	6.02921	31
179	Alcohol	4.01948	23
180	Alcohol	0.686944	5
182	Alcohol	0	0
184	Alcohol	1.38563	84
185	Alcohol	2.61039	159
187	Alcohol	2.84697	216
189	Alcohol	1.73204	77
190	Alcohol	1.749	57
192	Alcohol	3.77207	202
194	Alcohol	3.25623	115
195	Alcohol	2.55623	56
197	Alcohol	2.16694	73
199	Alcohol	2.07845	108
200	Alcohol	2.71301	48
202	Alcohol	3.43404	106
204	Alcohol	4.91672	128
205	Alcohol	4.05297	75
207	Alcohol	2.07451	89
209	Alcohol	2.4741	79
210	Alcohol	1.43413	41
212	Alcohol	3.68801	90
214	Alcohol	2.60432	65
215	Alcohol	2.90824	56
217	Alcohol	3.51767	70
219	Alcohol	3.79564	77
220	Alcohol	3.03199	45
222	Alcohol	3.74709	79
224	Alcohol	2.50898	50
225	Alcohol	4.64081	74
227	Alcohol	5.4291	112
229	Alcohol	3.75099	64
230	Alcohol	3.35006	48
232	Alcohol	3.25718	55
234	Alcohol	2.27093	33
235	Alcohol	4.06793	80
237	Alcohol	4.1455
239	Alcohol	1.64011	27
240	Alcohol	2.89921	54
242	Alcohol	3.81456	65
244	Alcohol	2.39494	47
245	Alcohol	3.01754	58
247	Alcohol	4.32806	66
249	Alcohol	2.45635	37
250	Alcohol	4.9109	70
252	Alcohol	5.47799	83
254	Alcohol	4.14723	71
255	Alcohol	3.6156	47
257	Alcohol	4.08884	58
259	Alcohol	2.62072	44
260	Alcohol	3.2657	44
262	Alcohol	4.37577	65
264	Alcohol	3.65682	59
265	Alcohol	3.60264	50
267	Alcohol	4.40849	9
269	Alcohol	3.35006	63
270	Alcohol	2.90536	42
272	Alcohol	4.4796	66
274	Alcohol	1.97414	54
275	Alcohol	5.58018	68
277	Alcohol	5.11575	65
279	Alcohol	3.30242	56
280	Alcohol	2.34955	30
282	Alcohol	3.60264	46
284	Alcohol	3.84589	71
285	Alcohol	2.64324
287	Alcohol	3.74675	55
289	Alcohol	2.3667	48
290	Alcohol	2.51665	38
292	Alcohol	4.07115	52
294	Alcohol	4.24739	80
295	Alcohol	3.27749	38
297	Alcohol	3.78035	43
299	Alcohol	3.35006	51
300	Alcohol	5.3242	60
302	Alcohol	6.82606	89
304	Alcohol	4.54651	76
305	Alcohol	1.93838	23
307	Alcohol	2.66689	35
309	Alcohol	4.18371	79
310	Alcohol	2.70198	37
312	Alcohol	4.1407	50
314	Alcohol	3.31211	65
315	Alcohol	2.95796	21
317	Alcohol	3.94724	45
319	Alcohol	3.12658	44
320	Alcohol	2.90107	29
322	Alcohol	3.45384	47
324	Alcohol	3.01078	56
325	Alcohol	5.05903	59
327	Alcohol	5.93286	58
329	Alcohol	5.11343	90
330	Alcohol	0	0
331	Alcohol	2.25735	329
332	Alcohol	0	0
333	Alcohol	0	0
334	Alcohol	0	0
335	Alcohol	0	0
336	Alcohol	0	0
337	Alcohol	3.62544	230
338	Alcohol	0
339	Alcohol	1.40682	92
340	Alcohol	0	0
341	Alcohol	0	0
342	Alcohol	0.148733	13
343	Alcohol	3.22892	198
344	Alcohol	0	0
345	Alcohol	1.81573	253
346	Alcohol	0	0
347	Alcohol	0	0
348	Alcohol	0.743664	51
349	Alcohol	2.21988	150
350	Alcohol	0	0
351	Alcohol	3.30722	149
352	Alcohol	0	0
353	Alcohol	0	0
354	Alcohol	3.92342	185
355	Alcohol	5.18249	157
356	Alcohol	0	0
357	Alcohol	5.14966	196
358	Alcohol	0.213314	4
359	Alcohol	0	0
360	Alcohol	0.363495	4
361	Alcohol	3.33209	50
362	Alcohol	0	0
363	Alcohol	2.76482	81
364	Alcohol	3.67192	320
365	Alcohol	0	0
366	Alcohol	0.363495	88
367	Alcohol	3.20393	77
368	Alcohol	2.98066	144
369	Alcohol	3.14184	98
370	Alcohol	2.49414	165
371	Alcohol	0	0
372	Alcohol	1.76216	85
373	Alcohol	3.21714	62
374	Alcohol	2.81006	224
375	Alcohol	2.9764	64
376	Alcohol	3.36603	296
377	Alcohol	0.0684046	4
378	Alcohol	2.46703	102
379	Alcohol	3.28023	56
380	Alcohol	2.88211	215
381	Alcohol	2.40645	53
382	Alcohol	3.7095	123
383	Alcohol	2.87299	206
384	Alcohol	3.3687	127
385	Alcohol	3.6381	43
386	Alcohol	3.96448	157
387	Alcohol	3.76017	71
388	Alcohol	5.27053	163
389	Alcohol	6.09678	505
390	Alcohol	1.87863	42
391	Alcohol	2.46017	32
392	Alcohol	2.73707	83
393	Alcohol	3.04361	70
394	Alcohol	3.47866	103
395	Alcohol	1.9754	136
396	Alcohol	0.765368	18
397	Alcohol	2.77558	43
398	Alcohol	3.0178	92
399	Alcohol	2.60881	43
400	Alcohol	3.80684	93
401	Alcohol	3.13339	176
402	Alcohol	1.60721	35
403	Alcohol	3.46947	51
404	Alcohol	3.74644	73
405	Alcohol	2.99767	69
406	Alcohol	4.03643	114
407	Alcohol	4.13637	114
408	Alcohol	1.95661	33
409	Alcohol	2.58633	37
410	Alcohol	3.67833	78
411	Alcohol	2.93649	62
412	Alcohol	1.65427	53
413	Alcohol	3.33578	78
414	Alcohol	4.82907	88
415	Alcohol	4.69456	70
416	Alcohol	4.39644	95
417	Alcohol	5.01651	93
418	Alcohol	4.15182	101
419	Alcohol	4.57594	70
420	Alcohol	1.46746	20
421	Alcohol	2.71225	36
422	Alcohol	3.32551	61
423	Alcohol	3.5824	59
424	Alcohol	3.13778	62
425	Alcohol	2.77733	54
426	Alcohol	3.35418	46
427	Alcohol	3.88346	75
428	Alcohol	2.97911	58
429	Alcohol	2.42875	44
430	Alcohol	3.59538	66
431	Alcohol	3.87535	57
432	Alcohol	3.66294	36
433	Alcohol	4.25031	71
434	Alcohol	3.44934	57
435	Alcohol	3.40025	46
436	Alcohol	3.64605	56
437	Alcohol	3.38561	50
438	Alcohol	4.20559	55
439	Alcohol	4.5539	78
440	Alcohol	3.86326	53
441	Alcohol	3.33953	50
442	Alcohol	2.92986	55
443	Alcohol	3.2554	49
444	Alcohol	4.55313	83
445	Alcohol	4.12887	76
446	Alcohol	3.76225	56
447	Alcohol	4.20534	67
448	Alcohol	3.84472	75
449	Alcohol	3.39319	98
450	Alcohol	3.0098	45
451	Alcohol	3.6763	90
452	Alcohol	1.53074	31
453	Alcohol	3.23041	43
454	Alcohol	3.19132	72
455	Alcohol	3.71265	58
456	Alcohol	3.55704	56
457	Alcohol	3.43523	48
458	Alcohol	4.17473	71
459	Alcohol	2.81166	44
460	Alcohol	2.99984	55
461	Alcohol	2.59885	40
462	Alcohol	2.75804	49
463	Alcohol	3.19416	40
464	Alcohol	1.98513	38
465	Alcohol	3.81456	46
466	Alcohol	2.18237	47
467	Alcohol	2.41069	34
468	Alcohol	3.43073	50
469	Alcohol	4.09817	88
470	Alcohol	3.17621	47
471	Alcohol	2.80132	29
472	Alcohol	2.93061	53
473	Alcohol	2.47096	35
474	Alcohol	5.63007	83
475	Alcohol	4.82138	108
476	Alcohol	3.88268	62
477	Alcohol	5.67709	78
478	Alcohol	4.69456	90
479	Alcohol	4.70084	69
480	Alcohol	3.0816	50
481	Alcohol	3.49088	65
482	Alcohol	3.40249	47
483	Alcohol	2.7217	32
484	Alcohol	3.15575	84
485	Alcohol	3.57615	63
486	Alcohol	2.67965	41
487	Alcohol	3.07671	64
488	Alcohol	3.93622	62
489	Alcohol	3.55005	46
490	Alcohol	3.40326	59
491	Alcohol	2.3841	28
492	Alcohol	2.93549	35
493	Alcohol	3.95128	82
494	Alcohol	2.77918	57
495	Alcohol	3.20675	56
496	Alcohol	3.15575	69
497	Alcohol	2.7739	42
498	Alcohol	3.53593	45
499	Alcohol	3.48643	84
500	Alcohol	2.91152	53
501	Alcohol	3.7412	47
502	Alcohol	3.21763	62
503	Alcohol	3.14375	58
504	Alcohol	4.63197	67
505	Alcohol	5.02923	56
506	Alcohol	3.98542	70
507	Alcohol	4.65723	66
508	Alcohol	4.88832	92
509	Alcohol	4.25031	62
514	Alcohol	2.85274	179
515	Alcohol	2.01679	132
520	Alcohol	3.13105	133
521	Alcohol	2.40463	108
526	Alcohol	2.7928	96
527	Alcohol	3.88172	68
532	Alcohol	3.47398	86
533	Alcohol	2.66392	34
538	Alcohol	1.77105	45
539	Alcohol	7.02266	75
544	Alcohol	2.5145	50
545	Alcohol	3.46345	31
550	Alcohol	0.463197	18
551	Alcohol	4.05297	42
556	Alcohol	2.28797	37
557	Alcohol	3.8704	45
562	Alcohol	1.04593	31
563	Alcohol	3.21317	43
568	Alcohol	3.43692	73
569	Alcohol	5.42777	57
574	Alcohol	2.4741	40
575	Alcohol	4.22919	47
580	Alcohol	1.10684	22
581	Alcohol	4.08821	39
586	Alcohol	1.15341	17
587	Alcohol	3.6337	44
592	Alcohol	1.40973	26
593	Alcohol	3.77346	41
598	Alcohol	4.73992	64
599	Alcohol	4.58827	44
604	Alcohol	1.32988	14
605	Alcohol	2.56342	26
610	Alcohol	1.32988	26
611	Alcohol	3.87977	43
616	Alcohol	1.8437	35
617	Alcohol	3.25594	43
622	Alcohol	1.46225	21
623	Alcohol	3.05245	38
628	Alcohol	3.73633	52
629	Alcohol	6.4172	16
634	Alcohol	1.97086	9
635	Alcohol	4.12052	35
640	Alcohol	1.90728	10
641	Alcohol	3.44503	47
646	Alcohol	2.46017	31
647	Alcohol	3.11004	38
652	Alcohol	1.38779	23
653	Alcohol	3.97026	53
658	Alcohol	4.34802	51
659	Alcohol	5.51335	72
664	Alcohol	2.17401	42
665	Alcohol	4.33192	58
670	Alcohol	2.60881	39
671	Alcohol	3.67557	43
676	Alcohol	3.05885	35
677	Alcohol	3.58788	39
682	Alcohol	2.50825	39
683	Alcohol	3.65432	57
688	Alcohol	5.23958	64
689	Alcohol	6.29718	72
