# Supplementary material for: The role of anterior insular cortex inputs to dorsolateral striatum in binge alcohol drinking
Source: eLife journal article supplement (doi:10.7554/elife.77411), 2022-07-28
Supplement: fig2-figsupp2-data1 [file Fig2S2F.xlsx]

## Sheet: Sheet1
	Fluid	Intake	Total Alcohol Lick Duration (s)
0	Alcohol	0	0
1	Alcohol	1.96112	26.76
3	Alcohol	0	0
4	Alcohol	3.07334	43.83
5	Alcohol	0	0
6	Alcohol	0	0
7	Alcohol	1.96112	48.37
9	Alcohol	0	0
10	Alcohol	1.53667	31.94
11	Alcohol	4.05297	142.86
12	Alcohol	0	0
13	Alcohol	2.66862	22.47
15	Alcohol	0	0
16	Alcohol	2.30501	78.58
17	Alcohol	3.82356	81.08
18	Alcohol	2.13314	22.46
19	Alcohol	2.66862	20.08
21	Alcohol	0	0
22	Alcohol	3.84168	54.86
23	Alcohol	5.35298	72.6
24	Alcohol	2.93428	12.75
25	Alcohol	7.21987	94.25
27	Alcohol	0.743664	0.3
28	Alcohol	3.13273	30.44
29	Alcohol	5.42982	26.39
30	Alcohol	2.12383	12.91
31	Alcohol	1.33983	7.01
33	Alcohol	0.730265	1.04
34	Alcohol	2.21071	15.97
35	Alcohol	2.97466	18.9
36	Alcohol	2.83177	23.47
37	Alcohol	1.33983	4.25
39	Alcohol	0.730265	0.03
40	Alcohol	2.94762	9.42
41	Alcohol	2.97466	9.76
42	Alcohol	3.47895	34.09
43	Alcohol	2.61482	11.49
45	Alcohol	4.1392	22.05
46	Alcohol	3.66785	13.69
47	Alcohol	7.07943	25.11
48	Alcohol	2.78316	15.68
49	Alcohol	1.96112	23.38
51	Alcohol	3.44934	87.45
52	Alcohol	3.66785	16.99
53	Alcohol	6.37148	11.23
54	Alcohol	4.06993	29.35
55	Alcohol	3.20393	20.81
57	Alcohol	2.70198	20.14
58	Alcohol	5.11186	24.08
59	Alcohol	7.1418	16.54
60	Alcohol	2.0696	6.94
61	Alcohol	3.19132	19.83
63	Alcohol	3.39161	15.47
64	Alcohol	3.61872	13.81
65	Alcohol	4.22919	7.13
66	Alcohol	2.75947	9.86
67	Alcohol	4.46784	21.73
69	Alcohol	4.74825	25.981
70	Alcohol	3.61872	15.12
71	Alcohol	4.93405	7.3
72	Alcohol	4.01948	11.57
73	Alcohol	4.39857	13.13
75	Alcohol	5.22964	11.99
76	Alcohol	2.84419	14.43
77	Alcohol	3.52432	5.77
78	Alcohol	2.67965	21.58
79	Alcohol	3.14184	23.5
81	Alcohol	4.57594	18.37
82	Alcohol	4.26629	15.09
83	Alcohol	6.34378	8.29
84	Alcohol	2.06083	8.44
85	Alcohol	0.640786	2.31
87	Alcohol	5.20864	21.85
88	Alcohol	5.0437	14.8
89	Alcohol	4.87052	9.98
90	Alcohol	1.32884	2.62
91	Alcohol	1.21894	2.81
93	Alcohol	4.5033	24.98
94	Alcohol	2.12383	10.89
95	Alcohol	3.44934	2.29
96	Alcohol	2.65769	5.95
97	Alcohol	1.21894	5.25
99	Alcohol	2.57332	6.98
100	Alcohol	2.83177	9.5
101	Alcohol	3.44934	6.37
102	Alcohol	3.93811	12.66
103	Alcohol	1.80132	12.4
105	Alcohol	3.82958	8.93
106	Alcohol	2.73618	13.48
107	Alcohol	3.39161	2.63
108	Alcohol	1.96905	6.07
109	Alcohol	2.40176	8.06
111	Alcohol	3.19132	11.02
112	Alcohol	2.73618	8.24
113	Alcohol	4.74825	5.75
114	Alcohol	5.83628	12.2
115	Alcohol	4.21871	23.54
117	Alcohol	3.90648	8.4
118	Alcohol	4.21088	16.06
119	Alcohol	6.07946	7.29
120	Alcohol	2.62541	3.39
121	Alcohol	2.3841	15.54
123	Alcohol	3.15406	5.81
124	Alcohol	3.46408	12.42
125	Alcohol	2.69077	2.24
126	Alcohol	2.62541	4.69
127	Alcohol	2.3841	18.42
129	Alcohol	3.15406	5.07
130	Alcohol	3.46408	12.29
131	Alcohol	2.69077	3.3
132	Alcohol	1.97706	4.01
133	Alcohol	1.17477	24.88
135	Alcohol	4.95019	7.41
136	Alcohol	2.02649	9.2
137	Alcohol	2.00974	2.62
138	Alcohol	3.2951	3.7
139	Alcohol	2.34955	29.7
141	Alcohol	1.85632	4.69
142	Alcohol	2.70198	8.34
143	Alcohol	0.334956	0.03
144	Alcohol	3.36346	3.55
145	Alcohol	2.91581	10.74
147	Alcohol	4.25031	7.57
148	Alcohol	3.40586	11.8
149	Alcohol	7.33871	4.99
150	Alcohol	2.63608	4.77
151	Alcohol	2.84419	22.83
153	Alcohol	4.21871	8.41
154	Alcohol	4.10427	14.79
155	Alcohol	2.00974	1.88
156	Alcohol	3.2951	4.31
157	Alcohol	2.27535	14.68
159	Alcohol	3.01336	8.28
160	Alcohol	4.10427	12.19
161	Alcohol	2.67965	2.95
162	Alcohol	3.26853	8.51
163	Alcohol	3.42505	10.52
165	Alcohol	3.01336	7.25
166	Alcohol	4.01948	11.16
167	Alcohol	2.65769	3.55
168	Alcohol	0.653705	0.17
169	Alcohol	2.28336	17.69
171	Alcohol	1.80802	4.36
172	Alcohol	2.67965	7.28
173	Alcohol	1.32884	2.15
174	Alcohol	3.30855	9.57
175	Alcohol	4.01001	31.75
177	Alcohol	3.62953	7.25
178	Alcohol	6.02921	18.1
179	Alcohol	4.01948	3.76
180	Alcohol	0.686944	1.79
182	Alcohol	0	0
184	Alcohol	1.38563	25.95
185	Alcohol	2.61039	28.96
187	Alcohol	2.84697	36.86
189	Alcohol	1.73204	12.68
190	Alcohol	1.749	6.53
192	Alcohol	3.77207	62.04
194	Alcohol	3.25623	19.39
195	Alcohol	2.55623	11.82
197	Alcohol	2.16694	18.77
199	Alcohol	2.07845	25.91
200	Alcohol	2.71301	12.98
202	Alcohol	3.43404	20.97
204	Alcohol	4.91672	30.93
205	Alcohol	4.05297	29.46
207	Alcohol	2.07451	18.91
209	Alcohol	2.4741	14.59
210	Alcohol	1.43413	14.93
212	Alcohol	3.68801	30.45
214	Alcohol	2.60432	14.41
215	Alcohol	2.90824	14.11
217	Alcohol	3.51767	30.7
219	Alcohol	3.79564	8.03
220	Alcohol	3.03199	11.38
222	Alcohol	3.74709	30.02
224	Alcohol	2.50898	7.69
225	Alcohol	4.64081	21.34
227	Alcohol	5.4291	41.49
229	Alcohol	3.75099	6.99
230	Alcohol	3.35006	13.27
232	Alcohol	3.25718	15.4
234	Alcohol	2.27093	3.85
235	Alcohol	4.06793	20.74
237	Alcohol	4.1455
239	Alcohol	1.64011	3.56
240	Alcohol	2.89921	17.83
242	Alcohol	3.81456	20.04
244	Alcohol	2.39494	5.79
245	Alcohol	3.01754	20.43
247	Alcohol	4.32806	20.24
249	Alcohol	2.45635	4.82
250	Alcohol	4.9109	19.9
252	Alcohol	5.47799	20.67
254	Alcohol	4.14723	8.72
255	Alcohol	3.6156	17.46
257	Alcohol	4.08884	16.02
259	Alcohol	2.62072	4.36
260	Alcohol	3.2657	11.95
262	Alcohol	4.37577	15.35
264	Alcohol	3.65682	6.78
265	Alcohol	3.60264	13.77
267	Alcohol	4.40849	0.22
269	Alcohol	3.35006	6.15
270	Alcohol	2.90536	11.97
272	Alcohol	4.4796	19.07
274	Alcohol	1.97414	4.82
275	Alcohol	5.58018	14.85
277	Alcohol	5.11575	11.05
279	Alcohol	3.30242	6.01
280	Alcohol	2.34955	7.19
282	Alcohol	3.60264	11.44
284	Alcohol	3.84589	6.25
285	Alcohol	2.64324
287	Alcohol	3.74675	18.39
289	Alcohol	2.3667	5.4
290	Alcohol	2.51665	8.03
292	Alcohol	4.07115	10.06
294	Alcohol	4.24739	8.02
295	Alcohol	3.27749	7.59
297	Alcohol	3.78035	6.56
299	Alcohol	3.35006	4.5
300	Alcohol	5.3242	14.12
302	Alcohol	6.82606	22.87
304	Alcohol	4.54651	7.96
305	Alcohol	1.93838	5.29
307	Alcohol	2.66689	9.55
309	Alcohol	4.18371	6.51
310	Alcohol	2.70198	7.26
312	Alcohol	4.1407	8.84
314	Alcohol	3.31211	6.96
315	Alcohol	2.95796	3.9
317	Alcohol	3.94724	7.18
319	Alcohol	3.12658	5.16
320	Alcohol	2.90107	4.14
322	Alcohol	3.45384	9.33
324	Alcohol	3.01078	6.25
325	Alcohol	5.05903	14.22
327	Alcohol	5.93286	11.01
329	Alcohol	5.11343	9.66
330	Alcohol	0	0
331	Alcohol	2.25735	241.26
332	Alcohol	0	0
333	Alcohol	0	0
334	Alcohol	0	0
335	Alcohol	0	0
336	Alcohol	0	0
337	Alcohol	3.62544	114.37
338	Alcohol	0
339	Alcohol	1.40682	15.78
340	Alcohol	0	0
341	Alcohol	0	0
342	Alcohol	0.148733	3.33
343	Alcohol	3.22892	56.5
344	Alcohol	0	0
345	Alcohol	1.81573	121.49
346	Alcohol	0	0
347	Alcohol	0	0
348	Alcohol	0.743664	9.85
349	Alcohol	2.21988	68.99
350	Alcohol	0	0
351	Alcohol	3.30722	42.77
352	Alcohol	0	0
353	Alcohol	0	0
354	Alcohol	3.92342	53.22
355	Alcohol	5.18249	110.87
356	Alcohol	0	0
357	Alcohol	5.14966	59.25
358	Alcohol	0.213314	1.33
359	Alcohol	0	0
360	Alcohol	0.363495	0.42
361	Alcohol	3.33209	11.55
362	Alcohol	0	0
363	Alcohol	2.76482	27.54
364	Alcohol	3.67192	111.53
365	Alcohol	0	0
366	Alcohol	0.363495	31.95
367	Alcohol	3.20393	27.31
368	Alcohol	2.98066	28.04
369	Alcohol	3.14184	35.81
370	Alcohol	2.49414	34.36
371	Alcohol	0	0
372	Alcohol	1.76216	17.63
373	Alcohol	3.21714	39.82
374	Alcohol	2.81006	72.72
375	Alcohol	2.9764	16.69
376	Alcohol	3.36603	90.1
377	Alcohol	0.0684046	0.49
378	Alcohol	2.46703	23.97
379	Alcohol	3.28023	12.4
380	Alcohol	2.88211	97.38
381	Alcohol	2.40645	12.89
382	Alcohol	3.7095	33.22
383	Alcohol	2.87299	42.37
384	Alcohol	3.3687	33.42
385	Alcohol	3.6381	7.63
386	Alcohol	3.96448	38.64
387	Alcohol	3.76017	15.35
388	Alcohol	5.27053	45.18
389	Alcohol	6.09678	164.95
390	Alcohol	1.87863	9.13
391	Alcohol	2.46017	8.36
392	Alcohol	2.73707	18.31
393	Alcohol	3.04361	18.24
394	Alcohol	3.47866	30.44
395	Alcohol	1.9754	27.48
396	Alcohol	0.765368	3.64
397	Alcohol	2.77558	11.04
398	Alcohol	3.0178	18.63
399	Alcohol	2.60881	9.26
400	Alcohol	3.80684	20.08
401	Alcohol	3.13339	46.4
402	Alcohol	1.60721	8.84
403	Alcohol	3.46947	14.04
404	Alcohol	3.74644	9.49
405	Alcohol	2.99767	22.44
406	Alcohol	4.03643	32.29
407	Alcohol	4.13637	28.72
408	Alcohol	1.95661	4.79
409	Alcohol	2.58633	5.13
410	Alcohol	3.67833	13.2
411	Alcohol	2.93649	14.61
412	Alcohol	1.65427	11.33
413	Alcohol	3.33578	20
414	Alcohol	4.82907	20.67
415	Alcohol	4.69456	24.85
416	Alcohol	4.39644	19.46
417	Alcohol	5.01651	27.91
418	Alcohol	4.15182	29.85
419	Alcohol	4.57594	16.83
420	Alcohol	1.46746	3.84
421	Alcohol	2.71225	8.62
422	Alcohol	3.32551	16.27
423	Alcohol	3.5824	20.73
424	Alcohol	3.13778	11.45
425	Alcohol	2.77733	8.18
426	Alcohol	3.35418	6.12
427	Alcohol	3.88346	41.45
428	Alcohol	2.97911	17.22
429	Alcohol	2.42875	15.19
430	Alcohol	3.59538	10.84
431	Alcohol	3.87535	7.07
432	Alcohol	3.66294	6.52
433	Alcohol	4.25031	22.35
434	Alcohol	3.44934	22.13
435	Alcohol	3.40025	18.82
436	Alcohol	3.64605	16.65
437	Alcohol	3.38561	8.27
438	Alcohol	4.20559	16.96
439	Alcohol	4.5539	25.02
440	Alcohol	3.86326	34.22
441	Alcohol	3.33953	19.14
442	Alcohol	2.92986	8.51
443	Alcohol	3.2554	6.28
444	Alcohol	4.55313	12.44
445	Alcohol	4.12887	26.82
446	Alcohol	3.76225	20.65
447	Alcohol	4.20534	17.74
448	Alcohol	3.84472	13.1
449	Alcohol	3.39319	14.15
450	Alcohol	3.0098	5.05
451	Alcohol	3.6763	36.84
452	Alcohol	1.53074	10.62
453	Alcohol	3.23041	11.4
454	Alcohol	3.19132	13.39
455	Alcohol	3.71265	5.28
456	Alcohol	3.55704	6.5
457	Alcohol	3.43523	11.26
458	Alcohol	4.17473	24.77
459	Alcohol	2.81166	16.85
460	Alcohol	2.99984	6.64
461	Alcohol	2.59885	4.43
462	Alcohol	2.75804	9.93
463	Alcohol	3.19416	9.21
464	Alcohol	1.98513	11.53
465	Alcohol	3.81456	5.4
466	Alcohol	2.18237	10.86
467	Alcohol	2.41069	2.88
468	Alcohol	3.43073	4.82
469	Alcohol	4.09817	27.56
470	Alcohol	3.17621	17.16
471	Alcohol	2.80132	4.92
472	Alcohol	2.93061	13.16
473	Alcohol	2.47096	2.32
474	Alcohol	5.63007	11.37
475	Alcohol	4.82138	34.72
476	Alcohol	3.88268	17.45
477	Alcohol	5.67709	10.42
478	Alcohol	4.69456	16.29
479	Alcohol	4.70084	7.1
480	Alcohol	3.0816	6.48
481	Alcohol	3.49088	14.92
482	Alcohol	3.40249	11.44
483	Alcohol	2.7217	3.49
484	Alcohol	3.15575	17.81
485	Alcohol	3.57615	5.4
486	Alcohol	2.67965	4.18
487	Alcohol	3.07671	18.68
488	Alcohol	3.93622	10.02
489	Alcohol	3.55005	6.58
490	Alcohol	3.40326	9
491	Alcohol	2.3841	3.34
492	Alcohol	2.93549	4.3
493	Alcohol	3.95128	20.41
494	Alcohol	2.77918	6.59
495	Alcohol	3.20675	14.62
496	Alcohol	3.15575	14.78
497	Alcohol	2.7739	5.16
498	Alcohol	3.53593	5.01
499	Alcohol	3.48643	26.63
500	Alcohol	2.91152	17.63
501	Alcohol	3.7412	11.62
502	Alcohol	3.21763	12.87
503	Alcohol	3.14375	4.69
504	Alcohol	4.63197	9.93
505	Alcohol	5.02923	11.39
506	Alcohol	3.98542	18.54
507	Alcohol	4.65723	17.96
508	Alcohol	4.88832	14.83
509	Alcohol	4.25031	8.84
514	Alcohol	2.85274	45.9
515	Alcohol	2.01679	38.19
520	Alcohol	3.13105	28.55
521	Alcohol	2.40463	33.51
526	Alcohol	2.7928	25.75
527	Alcohol	3.88172	10.12
532	Alcohol	3.47398	17.08
533	Alcohol	2.66392	3.41
538	Alcohol	1.77105	8.21
539	Alcohol	7.02266	9.58
544	Alcohol	2.5145	7.96
545	Alcohol	3.46345	3.93
550	Alcohol	0.463197	1.89
551	Alcohol	4.05297	6.75
556	Alcohol	2.28797	5.53
557	Alcohol	3.8704	4.95
562	Alcohol	1.04593	4.86
563	Alcohol	3.21317	7.87
568	Alcohol	3.43692	15.64
569	Alcohol	5.42777	9.13
574	Alcohol	2.4741	10.11
575	Alcohol	4.22919	4.41
580	Alcohol	1.10684	3.21
581	Alcohol	4.08821	4.22
586	Alcohol	1.15341	2.25
587	Alcohol	3.6337	4.18
592	Alcohol	1.40973	3.88
593	Alcohol	3.77346	6.54
598	Alcohol	4.73992	9.37
599	Alcohol	4.58827	2.64
604	Alcohol	1.32988	2.95
605	Alcohol	2.56342	1.99
610	Alcohol	1.32988	3.58
611	Alcohol	3.87977	3.23
616	Alcohol	1.8437	5.59
617	Alcohol	3.25594	3.58
622	Alcohol	1.46225	4.38
623	Alcohol	3.05245	4.41
628	Alcohol	3.73633	9.41
629	Alcohol	6.4172	1.94
634	Alcohol	1.97086	1.69
635	Alcohol	4.12052	3.93
640	Alcohol	1.90728	2.32
641	Alcohol	3.44503	5.22
646	Alcohol	2.46017	11.27
647	Alcohol	3.11004	4.01
652	Alcohol	1.38779	2.62
653	Alcohol	3.97026	4.83
658	Alcohol	4.34802	5.49
659	Alcohol	5.51335	5.71
664	Alcohol	2.17401	8.08
665	Alcohol	4.33192	3.99
670	Alcohol	2.60881	3.71
671	Alcohol	3.67557	2.91
676	Alcohol	3.05885	5.33
677	Alcohol	3.58788	2.67
682	Alcohol	2.50825	3.67
683	Alcohol	3.65432	9.2
688	Alcohol	5.23958	8.07
689	Alcohol	6.29718	7.13
