# Supplementary material for: The role of anterior insular cortex inputs to dorsolateral striatum in binge alcohol drinking
Source: eLife journal article supplement (doi:10.7554/elife.77411), 2022-07-28
Supplement: fig2-figsupp3-data1 [file Fig2S3A.xlsx]

## Sheet: Sheet1
	Virus	Fluid	Yoked	DIDWeek	Total Intake % Change
86	ChR2	Water	Paired	3	0
87	ChR2	Water	Paired	4	6.9462
88	ChR2	Water	Paired	5	-0.0934977
89	ChR2	Water	Paired	6	3.18222
110	ChR2	Water	Yoked	3	0
111	ChR2	Water	Yoked	4	-2.03291
112	ChR2	Water	Yoked	5	-8.65097
113	ChR2	Water	Yoked	6	-2.80588
116	ChR2	Water	Paired	3	0
117	ChR2	Water	Paired	4	-5.5938
118	ChR2	Water	Paired	5	-7.99425
119	ChR2	Water	Paired	6	-11.9343
122	ChR2	Water	Yoked	3	0
123	ChR2	Water	Yoked	4	-17.7915
124	ChR2	Water	Yoked	5	-22.9455
125	ChR2	Water	Yoked	6	-27.1756
128	ChR2	Water	Paired	3	0
129	ChR2	Water	Paired	4	1.2449
130	ChR2	Water	Paired	5	-11.434
131	ChR2	Water	Paired	6	-4.66614
134	ChR2	Water	Yoked	3	0
135	ChR2	Water	Yoked	4	42.5136
136	ChR2	Water	Yoked	5	52.1133
137	ChR2	Water	Yoked	6	55.4341
152	ChR2	Water	Paired	3	0
153	ChR2	Water	Paired	4	-20.1582
154	ChR2	Water	Paired	5	-23.6182
155	ChR2	Water	Paired	6	-27.5897
206	ChR2	Water	Yoked	3	0
207	ChR2	Water	Yoked	4	2.08063
208	ChR2	Water	Yoked	5	-4.57832
209	ChR2	Water	Yoked	6	-11.3292
