# Supplementary material for: The role of anterior insular cortex inputs to dorsolateral striatum in binge alcohol drinking
Source: eLife journal article supplement (doi:10.7554/elife.77411), 2022-07-28
Supplement: fig2-figsupp3-data1 [file Fig2S3B.xlsx]

## Sheet: Sheet1
	Virus	Fluid	Yoked	DIDWeek	Total Intake % Change
2	ChR2	Alcohol	Yoked	3	0
3	ChR2	Alcohol	Yoked	4	15.7549
4	ChR2	Alcohol	Yoked	5	2.18854
5	ChR2	Alcohol	Yoked	6	-3.14279
20	ChR2	Alcohol	Paired	3	0
21	ChR2	Alcohol	Paired	4	-31.443
22	ChR2	Alcohol	Paired	5	-29.2419
23	ChR2	Alcohol	Paired	6	-6.32812
44	ChR2	Alcohol	Paired	3	0
45	ChR2	Alcohol	Paired	4	2.12714
46	ChR2	Alcohol	Paired	5	10.4315
47	ChR2	Alcohol	Paired	6	7.67234
56	ChR2	Alcohol	Yoked	3	0
57	ChR2	Alcohol	Yoked	4	-2.73933
58	ChR2	Alcohol	Yoked	5	-7.36079
59	ChR2	Alcohol	Yoked	6	-5.99563
62	ChR2	Alcohol	Paired	3	0
63	ChR2	Alcohol	Paired	4	-22.2427
64	ChR2	Alcohol	Paired	5	-25.0026
65	ChR2	Alcohol	Paired	6	-32.2669
68	ChR2	Alcohol	Paired	3	0
69	ChR2	Alcohol	Paired	4	-24.5094
70	ChR2	Alcohol	Paired	5	-22.3248
71	ChR2	Alcohol	Paired	6	7.96873
74	ChR2	Alcohol	Yoked	3	0
75	ChR2	Alcohol	Yoked	4	-11.6471
76	ChR2	Alcohol	Yoked	5	-36.9717
77	ChR2	Alcohol	Yoked	6	-46.8853
80	ChR2	Alcohol	Yoked	3	0
81	ChR2	Alcohol	Yoked	4	3.96724
82	ChR2	Alcohol	Yoked	5	-11.6987
83	ChR2	Alcohol	Yoked	6	-14.728
