# Supplementary material for: The role of anterior insular cortex inputs to dorsolateral striatum in binge alcohol drinking
Source: eLife journal article supplement (doi:10.7554/elife.77411), 2022-07-28
Supplement: fig2-figsupp4-data1 [file Fig2S4A.xlsx]

## Sheet: Sheet1
	Fluid	ID	Session	Intake
420	Water	E19	1	36.4035
421	Water	E21	1	26.6968
422	Water	E22	1	37.788
423	Water	E23	1	29.5082
426	Water	E19	2	26.3158
427	Water	E21	2	28.0543
428	Water	E22	2	34.5622
429	Water	E23	2	27.0492
432	Water	E19	3	34.4828
433	Water	E21	3	25.3333
434	Water	E22	3	32.8767
435	Water	E23	3	18.595
438	Water	E19	4	34.4828
439	Water	E21	4	32
440	Water	E22	4	30.137
441	Water	E23	4	23.9669
444	Water	E19	5	76.9874
445	Water	E21	5	65.2174
446	Water	E22	5	66.2222
447	Water	E23	5	57.9365
450	Water	E19	6	41.7021
451	Water	E21	6	39.4737
452	Water	E22	6	24.4344
453	Water	E23	6	28.8
456	Water	E19	7	31.9149
457	Water	E21	7	32.4561
458	Water	E22	7	20.8145
459	Water	E23	7	34.8
462	Water	E19	8	37.9167
463	Water	E21	8	36.1702
464	Water	E22	8	18.8341
465	Water	E23	8	36.4341
468	Water	E19	9	38.75
469	Water	E21	9	39.5745
470	Water	E22	9	25.5605
471	Water	E23	9	45.3488
474	Water	E19	10	80.1653
475	Water	E21	10	51.6949
476	Water	E22	10	58.6957
477	Water	E23	10	56.705
480	Water	E19	11	42.0408
481	Water	E21	11	47.4359
482	Water	E22	11	29.7778
483	Water	E23	11	28.8973
486	Water	E19	12	31.4286
487	Water	E21	12	44.4444
488	Water	E22	12	32.4444
489	Water	E23	12	35.7414
492	Water	E19	13	39.6761
493	Water	E21	13	45.7983
494	Water	E22	13	31.7181
495	Water	E23	13	37.3585
498	Water	E19	14	34.8178
499	Water	E21	14	47.479
500	Water	E22	14	34.3612
501	Water	E23	14	27.5472
504	Water	E19	15	73.1225
505	Water	E21	15	72.428
506	Water	E22	15	58.952
509	Water	E19	16	30.4
510	Water	E21	16	34.0336
511	Water	E22	16	27.7056
512	Water	E23	16	32.7138
515	Water	E19	17	41.6
516	Water	E21	17	41.5966
517	Water	E22	17	32.4675
518	Water	E23	17	33.0855
521	Water	E19	18	39.4531
522	Water	E21	18	32.2314
523	Water	E22	18	31.6239
524	Water	E23	18	29.5203
527	Water	E19	19	30.4688
528	Water	E21	19	27.686
529	Water	E22	19	25.2137
530	Water	E23	19	25.8303
533	Water	E19	20	66.7969
534	Water	E21	20	76.2097
535	Water	E22	20	72.5738
536	Water	E23	20	63.4686
539	Water	E19	21	34.4961
540	Water	E21	21	37.1429
541	Water	E22	21	28.7554
542	Water	E23	21	36.3636
545	Water	E19	22	34.4961
546	Water	E21	22	37.9592
547	Water	E22	22	36.9099
548	Water	E23	22	32.3636
551	Water	E19	23	34.6154
552	Water	E21	23	33.3333
553	Water	E22	23	26.3598
554	Water	E23	23	33.8129
557	Water	E19	24	29.6154
558	Water	E21	24	30.5221
559	Water	E22	24	14.2259
560	Water	E23	24	29.4964
563	Water	E19	25	70.1887
564	Water	E21	25	59.5238
565	Water	E22	25	59.5918
566	Water	E23	25	65.0177
569	Water	E19	26	35.9073
570	Water	E21	26	28.6853
571	Water	E22	26	36.4017
572	Water	E23	26	36.7857
575	Water	E19	27	30.888
576	Water	E21	27	32.6693
577	Water	E22	27	29.7071
578	Water	E23	27	34.6429
581	Water	E19	28	26.616
582	Water	E21	28	35.7143
583	Water	E22	28	38.5542
584	Water	E23	28	41.958
587	Water	E19	29	31.1787
588	Water	E21	29	32.5397
589	Water	E22	29	26.506
590	Water	E23	29	28.6713
593	Water	E19	30	70.1107
594	Water	E21	30	57.9767
595	Water	E22	30	47.3469
596	Water	E23	30	59.2982
599	Water	E12	1	14.3411
600	Water	E13	1	1.68067
601	Water	E14	1	4.36508
602	Water	E15	1	10.8696
603	Water	E16	1	9.87654
604	Water	E12	2	17.8295
605	Water	E13	2	1.68067
606	Water	E14	2	21.0317
607	Water	E15	2	17.3913
608	Water	E16	2	16.8724
609	Water	E12	3	16.9231
610	Water	E13	3	2.14592
611	Water	E14	3	26.2357
612	Water	E15	3	10.7296
613	Water	E16	3	23.2653
614	Water	E12	4	31.9231
615	Water	E13	4	2.14592
616	Water	E14	4	28.8973
617	Water	E15	4	17.5966
618	Water	E16	4	19.1837
619	Water	E12	5	56.2264
620	Water	E13	5	41.4634
621	Water	E14	5	53.9623
622	Water	E15	5	43.5146
623	Water	E16	5	48.8189
624	Water	E12	6	30.9434
625	Water	E13	6	33.3333
626	Water	E14	6	20.3065
627	Water	E15	6	21.371
628	Water	E16	6	21.2
629	Water	E12	7	32.0755
630	Water	E13	7	15.0407
631	Water	E14	7	28.3525
632	Water	E15	7	17.7419
633	Water	E16	7	21.6
634	Water	E12	8	38.2022
635	Water	E13	8	29.0984
636	Water	E14	8	36.3636
637	Water	E15	8	11.5538
638	Water	E16	8	28.7402
639	Water	E12	9	23.5955
640	Water	E13	9	21.3115
641	Water	E14	9	26.5152
642	Water	E15	9	7.17131
643	Water	E16	9	22.4409
644	Water	E12	10	66.2921
645	Water	E13	10	45.9016
646	Water	E14	10	55.303
647	Water	E15	10	60.1594
648	Water	E16	10	65.748
649	Water	E12	11	28.7823
650	Water	E13	11	13.9442
651	Water	E14	11	34.5455
652	Water	E15	11	18.7266
653	Water	E16	11	33.7121
654	Water	E12	12	27.6753
655	Water	E13	12	17.9283
656	Water	E14	12	38.1818
657	Water	E15	12	22.4719
658	Water	E16	12	32.197
659	Water	E12	13	34.3173
660	Water	E13	13	20.7031
661	Water	E14	13	31.8021
662	Water	E15	13	21.2687
663	Water	E16	13	27.7154
664	Water	E12	14	30.9963
665	Water	E13	14	23.0469
666	Water	E14	14	29.682
667	Water	E15	14	26.1194
668	Water	E16	14	31.8352
669	Water	E12	15	61.6788
670	Water	E13	15	62.6923
671	Water	E14	15	55.516
672	Water	E15	15	50.7299
673	Water	E16	15	54.5788
674	Water	E12	16	40.2174
675	Water	E13	16	15.0579
676	Water	E14	16	31.4488
677	Water	E15	16	25.1825
678	Water	E16	16	33.3333
679	Water	E12	17	44.5652
680	Water	E13	17	17.7606
681	Water	E14	17	38.5159
682	Water	E15	17	25.1825
683	Water	E16	17	32.2464
684	Water	E12	18	29.6029
685	Water	E13	18	23.3962
686	Water	E14	18	33.218
687	Water	E15	18	17.9211
688	Water	E16	18	30.8511
689	Water	E12	19	33.935
690	Water	E13	19	20.7547
691	Water	E14	19	28.0277
692	Water	E15	19	24.3728
693	Water	E16	19	25.1773
694	Water	E12	20	47.8723
695	Water	E13	20	41.6974
696	Water	E14	20	51.7123
697	Water	E15	20	48.9209
698	Water	E16	20	54.7703
699	Water	E12	21	28.4173
700	Water	E13	21	9.66543
701	Water	E14	21	28.866
702	Water	E15	21	16.0714
703	Water	E16	21	21.2766
704	Water	E12	22	33.4532
705	Water	E13	22	17.1004
706	Water	E14	22	31.9588
707	Water	E15	22	21.4286
708	Water	E16	22	29.4326
709	Water	E12	23	26.9504
710	Water	E13	23	18.0812
711	Water	E14	23	33.7884
712	Water	E15	23	22.1831
713	Water	E16	23	31.4685
714	Water	E12	24	28.7234
715	Water	E13	24	88.9299
716	Water	E14	24	30.7167
717	Water	E15	24	21.4789
718	Water	E16	24	29.021
719	Water	E12	25	65.7343
720	Water	E13	25	57.2954
721	Water	E14	25	56.8106
722	Water	E15	25	43.8596
723	Water	E16	25	53.2646
724	Water	E12	26	28.5714
725	Water	E13	26	20.073
726	Water	E14	26	29.3333
727	Water	E15	26	9.18728
728	Water	E16	26	25.1748
729	Water	E12	27	36.0714
730	Water	E13	27	25.1825
731	Water	E14	27	37
732	Water	E15	27	22.9682
733	Water	E16	27	36.3636
734	Water	E12	28	29.3706
735	Water	E13	28	25.3623
736	Water	E14	28	31.3725
737	Water	E15	28	17.4216
738	Water	E16	28	25.8621
739	Water	E12	29	30.7692
740	Water	E13	29	21.0145
741	Water	E14	29	27.451
742	Water	E15	29	14.6341
743	Water	E16	29	27.2414
744	Water	E12	30	64.5051
745	Water	E13	30	45.4874
746	Water	E14	30	56.8484
747	Water	E15	30	48.5915
748	Water	E16	30	60.3448
749	Water	F9	1	3.11111
750	Water	F13	1	1.84332
751	Water	F15	1	3.39806
752	Water	F16	1	2.46305
753	Water	F9	2	1.77778
754	Water	F13	2	1.38249
755	Water	F15	2	49.5146
756	Water	F16	2	17.2414
757	Water	F9	3	1.31004
758	Water	F13	3	3.65297
759	Water	F15	3	2.39234
760	Water	F16	3	13.4615
761	Water	F9	4	60.6987
762	Water	F13	4	71.2329
763	Water	F15	4	53.11
764	Water	F16	4	61.0577
765	Water	F9	5	58.5366
766	Water	F13	5	57.265
767	Water	F15	5	43.8356
768	Water	F16	5	48.1481
769	Water	F9	6	40.8907
770	Water	F13	6	30.9322
771	Water	F15	6	28.6996
772	Water	F16	6	20.8333
773	Water	F9	7	84.6154
774	Water	F13	7	87.7119
775	Water	F15	7	56.0538
776	Water	F16	7	71.2963
777	Water	F9	8	44.7876
778	Water	F13	8	30
779	Water	F15	8	31.441
780	Water	F16	8	32.1429
781	Water	F9	9	37.0656
782	Water	F13	9	37.0833
783	Water	F15	9	35.8079
784	Water	F16	9	28.125
785	Water	F9	10	64.6388
786	Water	F13	10	64.876
787	Water	F15	10	68.9362
788	Water	F16	10	62.7193
789	Water	F9	11	34.5865
790	Water	F13	11	51.2195
791	Water	F15	11	39.2241
792	Water	F16	11	33.6245
793	Water	F9	12	21.8045
794	Water	F13	12	43.0894
795	Water	F15	12	32.7586
796	Water	F16	12	30.5677
797	Water	F9	13	38.3459
798	Water	F13	13	38.5542
799	Water	F15	13	31.0638
800	Water	F16	13	22.9437
801	Water	F9	14	40.2256
802	Water	F13	14	45.3815
803	Water	F15	14	33.617
804	Water	F16	14	27.2727
805	Water	F9	15	50
806	Water	F13	15	76.1719
807	Water	F15	15	61.6034
808	Water	F16	15	61.6034
809	Water	F9	16	35.9551
810	Water	F13	16	32.3887
811	Water	F15	16	38.4937
812	Water	F16	16	18.1034
813	Water	F9	17	35.206
814	Water	F13	17	42.1053
815	Water	F15	17	36.8201
816	Water	F16	17	28.8793
817	Water	F9	18	31.5985
818	Water	F13	18	36.1446
819	Water	F15	18	37.5
820	Water	F16	18	80.4255
821	Water	F9	19	33.829
822	Water	F13	19	30.9237
823	Water	F15	19	40
824	Water	F16	19	24.2553
825	Water	F9	20	52.2222
826	Water	F13	20	61.5686
827	Water	F15	20	63.7097
828	Water	F16	20	66.2602
829	Water	F9	21	29.927
830	Water	F13	21	28.8538
831	Water	F15	21	31.8725
832	Water	F16	21	29.4606
833	Water	F9	22	26.2774
834	Water	F13	22	41.502
835	Water	F15	22	44.6215
836	Water	F16	22	29.8755
837	Water	F9	23	31.5217
838	Water	F13	23	34.1085
839	Water	F15	23	31.3253
840	Water	F16	23	22.7273
841	Water	F9	24	34.4203
842	Water	F13	24	34.8837
843	Water	F15	24	34.9398
844	Water	F16	24	24.3802
845	Water	F9	25	54.3478
846	Water	F13	25	54.9801
847	Water	F15	25	54.8
848	Water	F16	25	54.918
849	Water	F9	26	28.2686
850	Water	F13	26	27.0992
851	Water	F15	26	26.07
852	Water	F16	26	27.0492
853	Water	F9	27	27.5618
854	Water	F13	27	33.9695
855	Water	F15	27	34.2412
856	Water	F16	27	28.6885
857	Water	F9	28	32.7526
858	Water	F13	28	34.6008
859	Water	F15	28	36.4706
860	Water	F16	28	24.3902
861	Water	F9	29	28.5714
862	Water	F13	29	33.4601
863	Water	F15	29	33.7255
864	Water	F16	29	25.2033
865	Water	F9	30	46.8531
866	Water	F13	30	55.0943
867	Water	F15	30	49.2308
868	Water	F16	30	59.1093
869	Water	F34	1	20.1493
870	Water	F33	1	2.87081
871	Water	F35	1	2.81124
872	Water	F30	1	50.3968
873	Water	F31	1	26.5873
874	Water	F32	1	24.3902
875	Water	F34	2	19.7761
876	Water	F33	2	2.87081
877	Water	F35	2	3.21285
878	Water	F30	2	37.6984
879	Water	F31	2	26.9841
880	Water	F32	2	18.6992
881	Water	F34	3	14.1791
882	Water	F33	3	1.86047
883	Water	F35	3	16.9291
884	Water	F30	3	21.0317
885	Water	F31	3	20.7031
886	Water	F32	3	20.0803
887	Water	F34	4	19.403
888	Water	F33	4	5.11628
889	Water	F35	4	33.4646
890	Water	F30	4	21.8254
891	Water	F31	4	26.5625
892	Water	F32	4	32.5301
893	Water	F34	5	50.3731
894	Water	F33	5	33.9535
895	Water	F35	5	66.5354
896	Water	F30	5	44.4444
897	Water	F31	5	52.7344
898	Water	F32	5	72.6908
899	Water	F34	6	22.1818
900	Water	F33	6	25.1101
901	Water	F35	6	25.969
902	Water	F30	6	15.3543
903	Water	F31	6	23.4375
904	Water	F32	6	31.1284
905	Water	F34	7	33.0909
906	Water	F33	7	39.207
907	Water	F35	7	25.5814
908	Water	F30	7	23.622
909	Water	F31	7	23.0469
910	Water	F32	7	33.0739
911	Water	F34	8	16.4286
912	Water	F33	8	19.7368
913	Water	F35	8	33.8346
914	Water	F30	8	24.7104
915	Water	F31	8	13.7931
916	Water	F32	8	32.3194
917	Water	F34	9	21.7857
918	Water	F33	9	30.2632
919	Water	F35	9	27.8195
920	Water	F30	9	17.7606
921	Water	F31	9	20.6897
922	Water	F32	9	37.6426
923	Water	F34	10	53.5714
924	Water	F33	10	51.7544
925	Water	F35	10	49.2481
926	Water	F30	10	45.9459
927	Water	F31	10	59.387
928	Water	F32	10	71.4829
929	Water	F34	11	27.4306
930	Water	F33	11	24.5833
931	Water	F35	11	35.206
932	Water	F30	11	25.283
933	Water	F31	11	23.3962
934	Water	F32	11	30.5019
935	Water	F34	12	24.6528
936	Water	F33	12	24.5833
937	Water	F35	12	35.5805
938	Water	F30	12	19.2453
939	Water	F31	12	18.8679
940	Water	F32	12	34.749
941	Water	F34	13	36.9338
942	Water	F33	13	25.5144
943	Water	F35	13	36.63
944	Water	F30	13	32.7068
945	Water	F31	13	22.1402
946	Water	F32	13	38.1132
947	Water	F34	14	28.223
948	Water	F33	14	23.8683
949	Water	F35	14	39.1941
950	Water	F30	14	26.3158
951	Water	F31	14	53.5055
952	Water	F32	14	36.6038
953	Water	F34	15	66.2021
954	Water	F33	15	56.7901
955	Water	F35	15	61.1722
956	Water	F30	15	55.2632
957	Water	F31	15	51.6605
958	Water	F32	15	62.2642
959	Water	F34	16	23.3898
960	Water	F33	16	19.6
961	Water	F35	16	25.1852
962	Water	F30	16	26.0073
963	Water	F31	16	13.5036
964	Water	F32	16	26.8939
965	Water	F34	17	30.5085
966	Water	F33	17	20.4
967	Water	F35	17	25.9259
968	Water	F30	17	24.1758
969	Water	F31	17	21.8978
970	Water	F32	17	29.9242
971	Water	F34	18	28.2828
972	Water	F33	18	18.1102
973	Water	F35	18	28
974	Water	F30	18	27.0073
975	Water	F31	18	15.2174
976	Water	F32	18	23.221
977	Water	F34	19	23.9057
978	Water	F33	19	8.66142
979	Water	F35	19	31.6364
980	Water	F30	19	28.4672
981	Water	F31	19	10.1449
982	Water	F32	19	35.9551
983	Water	F34	20	77.7778
984	Water	F33	20	42.9134
985	Water	F35	20	66.9091
986	Water	F30	20	67.1533
987	Water	F31	20	45.2899
988	Water	F32	20	75.6554
989	Water	F34	21	28.1457
990	Water	F33	21	5.5336
991	Water	F35	21	25.2747
992	Water	F30	21	20.0743
993	Water	F31	21	13.9785
994	Water	F32	21	33.8182
995	Water	F34	22	33.7748
996	Water	F33	22	5.5336
997	Water	F35	22	23.0769
998	Water	F30	22	28.2528
999	Water	F31	22	7.8853
1000	Water	F32	22	32
1001	Water	F34	23	33.4437
1002	Water	F33	23	9.48617
1003	Water	F35	23	21.6117
1004	Water	F30	23	26.7658
1005	Water	F31	23	5.37634
1006	Water	F32	23	37.0909
1007	Water	F34	24	32.2476
1008	Water	F33	24	9.30233
1009	Water	F35	24	18.1818
1010	Water	F30	24	25
1011	Water	F31	24	2.15827
1012	Water	F32	24	30
1013	Water	F34	25	62.5407
1014	Water	F33	25	27.907
1015	Water	F35	25	55.2727
1016	Water	F30	25	59.058
1017	Water	F31	25	27.3381
1018	Water	F32	25	57.8571
1019	Water	F34	26	15.8065
1020	Water	F33	26	9.54198
1021	Water	F35	26	14.0288
1022	Water	F30	26	14.3369
1023	Water	F31	26	13.9785
1024	Water	F32	26	26.4706
1025	Water	F34	27	38.3871
1026	Water	F33	27	10.687
1027	Water	F35	27	19.4245
1028	Water	F30	27	30.4659
1029	Water	F31	27	10.3943
1030	Water	F32	27	26.1029
1031	Water	F34	28	35.7143
1032	Water	F33	28	8.52713
1033	Water	F35	28	27.4368
1034	Water	F30	28	17.5627
1035	Water	F31	28	9.67742
1036	Water	F32	28	31.6726
1037	Water	F34	29	36.039
1038	Water	F33	29	4.65116
1039	Water	F35	29	28.8809
1040	Water	F30	29	15.0538
1041	Water	F31	29	8.24373
1042	Water	F32	29	28.4698
1043	Water	F34	30	63.5783
1044	Water	F33	30	35.4962
1045	Water	F35	30	58.6572
1046	Water	F30	30	58.8235
1047	Water	F31	30	49.3056
1048	Water	F32	30	75
