# Supplementary material for: The role of anterior insular cortex inputs to dorsolateral striatum in binge alcohol drinking
Source: eLife journal article supplement (doi:10.7554/elife.77411), 2022-07-28
Supplement: fig2-figsupp4-data1 [file Fig2S4B.xlsx]

## Sheet: Sheet1
	Fluid	ID	Session	Intake
0	Alcohol	D1	1	0
1	Alcohol	D2	1	1.96112
2	Alcohol	D4	1	0
3	Alcohol	D5	1	3.07334
4	Alcohol	D7	1	0
5	Alcohol	D1	2	0
6	Alcohol	D2	2	1.96112
7	Alcohol	D4	2	0
8	Alcohol	D5	2	1.53667
9	Alcohol	D7	2	4.05297
10	Alcohol	D1	3	0
11	Alcohol	D2	3	2.66862
12	Alcohol	D4	3	0
13	Alcohol	D5	3	2.30501
14	Alcohol	D7	3	3.82356
15	Alcohol	D1	4	2.13314
16	Alcohol	D2	4	2.66862
17	Alcohol	D4	4	0
18	Alcohol	D5	4	3.84168
19	Alcohol	D7	4	5.35298
20	Alcohol	D1	5	2.93428
21	Alcohol	D2	5	7.21987
22	Alcohol	D4	5	0.743664
23	Alcohol	D5	5	3.13273
24	Alcohol	D7	5	5.42982
25	Alcohol	D1	6	2.12383
26	Alcohol	D2	6	1.33983
27	Alcohol	D4	6	0.730265
28	Alcohol	D5	6	2.21071
29	Alcohol	D7	6	2.97466
30	Alcohol	D1	7	2.83177
31	Alcohol	D2	7	1.33983
32	Alcohol	D4	7	0.730265
33	Alcohol	D5	7	2.94762
34	Alcohol	D7	7	2.97466
35	Alcohol	D1	8	3.47895
36	Alcohol	D2	8	2.61482
37	Alcohol	D4	8	4.1392
38	Alcohol	D5	8	3.66785
39	Alcohol	D7	8	7.07943
40	Alcohol	D1	9	2.78316
41	Alcohol	D2	9	1.96112
42	Alcohol	D4	9	3.44934
43	Alcohol	D5	9	3.66785
44	Alcohol	D7	9	6.37148
45	Alcohol	D1	10	4.06993
46	Alcohol	D2	10	3.20393
47	Alcohol	D4	10	2.70198
48	Alcohol	D5	10	5.11186
49	Alcohol	D7	10	7.1418
50	Alcohol	D1	11	2.0696
51	Alcohol	D2	11	3.19132
52	Alcohol	D4	11	3.39161
53	Alcohol	D5	11	3.61872
54	Alcohol	D7	11	4.22919
55	Alcohol	D1	12	2.75947
56	Alcohol	D2	12	4.46784
57	Alcohol	D4	12	4.74825
58	Alcohol	D5	12	3.61872
59	Alcohol	D7	12	4.93405
60	Alcohol	D1	13	4.01948
61	Alcohol	D2	13	4.39857
62	Alcohol	D4	13	5.22964
63	Alcohol	D5	13	2.84419
64	Alcohol	D7	13	3.52432
65	Alcohol	D1	14	2.67965
66	Alcohol	D2	14	3.14184
67	Alcohol	D4	14	4.57594
68	Alcohol	D5	14	4.26629
69	Alcohol	D7	14	6.34378
70	Alcohol	D1	15	2.06083
71	Alcohol	D2	15	0.640786
72	Alcohol	D4	15	5.20864
73	Alcohol	D5	15	5.0437
74	Alcohol	D7	15	4.87052
75	Alcohol	D1	16	1.32884
76	Alcohol	D2	16	1.21894
77	Alcohol	D4	16	4.5033
78	Alcohol	D5	16	2.12383
79	Alcohol	D7	16	3.44934
80	Alcohol	D1	17	2.65769
81	Alcohol	D2	17	1.21894
82	Alcohol	D4	17	2.57332
83	Alcohol	D5	17	2.83177
84	Alcohol	D7	17	3.44934
85	Alcohol	D1	18	3.93811
86	Alcohol	D2	18	1.80132
87	Alcohol	D4	18	3.82958
88	Alcohol	D5	18	2.73618
89	Alcohol	D7	18	3.39161
90	Alcohol	D1	19	1.96905
91	Alcohol	D2	19	2.40176
92	Alcohol	D4	19	3.19132
93	Alcohol	D5	19	2.73618
94	Alcohol	D7	19	4.74825
95	Alcohol	D1	20	5.83628
96	Alcohol	D2	20	4.21871
97	Alcohol	D4	20	3.90648
98	Alcohol	D5	20	4.21088
99	Alcohol	D7	20	6.07946
100	Alcohol	D1	21	2.62541
101	Alcohol	D2	21	2.3841
102	Alcohol	D4	21	3.15406
103	Alcohol	D5	21	3.46408
104	Alcohol	D7	21	2.69077
105	Alcohol	D1	22	2.62541
106	Alcohol	D2	22	2.3841
107	Alcohol	D4	22	3.15406
108	Alcohol	D5	22	3.46408
109	Alcohol	D7	22	2.69077
110	Alcohol	D1	23	1.97706
111	Alcohol	D2	23	1.17477
112	Alcohol	D4	23	4.95019
113	Alcohol	D5	23	2.02649
114	Alcohol	D7	23	2.00974
115	Alcohol	D1	24	3.2951
116	Alcohol	D2	24	2.34955
117	Alcohol	D4	24	1.85632
118	Alcohol	D5	24	2.70198
119	Alcohol	D7	24	0.334956
120	Alcohol	D1	25	3.36346
121	Alcohol	D2	25	2.91581
122	Alcohol	D4	25	4.25031
123	Alcohol	D5	25	3.40586
124	Alcohol	D7	25	7.33871
125	Alcohol	D1	26	2.63608
126	Alcohol	D2	26	2.84419
127	Alcohol	D4	26	4.21871
128	Alcohol	D5	26	4.10427
129	Alcohol	D7	26	2.00974
130	Alcohol	D1	27	3.2951
131	Alcohol	D2	27	2.27535
132	Alcohol	D4	27	3.01336
133	Alcohol	D5	27	4.10427
134	Alcohol	D7	27	2.67965
135	Alcohol	D1	28	3.26853
136	Alcohol	D2	28	3.42505
137	Alcohol	D4	28	3.01336
138	Alcohol	D5	28	4.01948
139	Alcohol	D7	28	2.65769
140	Alcohol	D1	29	0.653705
141	Alcohol	D2	29	2.28336
142	Alcohol	D4	29	1.80802
143	Alcohol	D5	29	2.67965
144	Alcohol	D7	29	1.32884
145	Alcohol	D1	30	3.30855
146	Alcohol	D2	30	4.01001
147	Alcohol	D4	30	3.62953
148	Alcohol	D5	30	6.02921
149	Alcohol	D7	30	4.01948
150	Alcohol	D8	1	0.686944
151	Alcohol	D11	1	0
152	Alcohol	D13	1	1.38563
153	Alcohol	D8	2	2.61039
154	Alcohol	D11	2	2.84697
155	Alcohol	D13	2	1.73204
156	Alcohol	D8	3	1.749
157	Alcohol	D11	3	3.77207
158	Alcohol	D13	3	3.25623
159	Alcohol	D8	4	2.55623
160	Alcohol	D11	4	2.16694
161	Alcohol	D13	4	2.07845
162	Alcohol	D8	5	2.71301
163	Alcohol	D11	5	3.43404
164	Alcohol	D13	5	4.91672
165	Alcohol	D8	6	4.05297
166	Alcohol	D11	6	2.07451
167	Alcohol	D13	6	2.4741
168	Alcohol	D8	7	1.43413
169	Alcohol	D11	7	3.68801
170	Alcohol	D13	7	2.60432
171	Alcohol	D8	8	2.90824
172	Alcohol	D11	8	3.51767
173	Alcohol	D13	8	3.79564
174	Alcohol	D8	9	3.03199
175	Alcohol	D11	9	3.74709
176	Alcohol	D13	9	2.50898
177	Alcohol	D8	10	4.64081
178	Alcohol	D11	10	5.4291
179	Alcohol	D13	10	3.75099
180	Alcohol	D8	11	3.35006
181	Alcohol	D11	11	3.25718
182	Alcohol	D13	11	2.27093
183	Alcohol	D8	12	4.06793
184	Alcohol	D11	12	4.1455
185	Alcohol	D13	12	1.64011
186	Alcohol	D8	13	2.89921
187	Alcohol	D11	13	3.81456
188	Alcohol	D13	13	2.39494
189	Alcohol	D8	14	3.01754
190	Alcohol	D11	14	4.32806
191	Alcohol	D13	14	2.45635
192	Alcohol	D8	15	4.9109
193	Alcohol	D11	15	5.47799
194	Alcohol	D13	15	4.14723
195	Alcohol	D8	16	3.6156
196	Alcohol	D11	16	4.08884
197	Alcohol	D13	16	2.62072
198	Alcohol	D8	17	3.2657
199	Alcohol	D11	17	4.37577
200	Alcohol	D13	17	3.65682
201	Alcohol	D8	18	3.60264
202	Alcohol	D11	18	4.40849
203	Alcohol	D13	18	3.35006
204	Alcohol	D8	19	2.90536
205	Alcohol	D11	19	4.4796
206	Alcohol	D13	19	1.97414
207	Alcohol	D8	20	5.58018
208	Alcohol	D11	20	5.11575
209	Alcohol	D13	20	3.30242
210	Alcohol	D8	21	2.34955
211	Alcohol	D11	21	3.60264
212	Alcohol	D13	21	3.84589
213	Alcohol	D8	22	2.64324
214	Alcohol	D11	22	3.74675
215	Alcohol	D13	22	2.3667
216	Alcohol	D8	23	2.51665
217	Alcohol	D11	23	4.07115
218	Alcohol	D13	23	4.24739
219	Alcohol	D8	24	3.27749
220	Alcohol	D11	24	3.78035
221	Alcohol	D13	24	3.35006
222	Alcohol	D8	25	5.3242
223	Alcohol	D11	25	6.82606
224	Alcohol	D13	25	4.54651
225	Alcohol	D8	26	1.93838
226	Alcohol	D11	26	2.66689
227	Alcohol	D13	26	4.18371
228	Alcohol	D8	27	2.70198
229	Alcohol	D11	27	4.1407
230	Alcohol	D13	27	3.31211
231	Alcohol	D8	28	2.95796
232	Alcohol	D11	28	3.94724
233	Alcohol	D13	28	3.12658
234	Alcohol	D8	29	2.90107
235	Alcohol	D11	29	3.45384
236	Alcohol	D13	29	3.01078
237	Alcohol	D8	30	5.05903
238	Alcohol	D11	30	5.93286
239	Alcohol	D13	30	5.11343
240	Alcohol	D23	1	0
241	Alcohol	D24	1	2.25735
242	Alcohol	D25	1	0
243	Alcohol	D28	1	0
244	Alcohol	D31	1	0
245	Alcohol	D34	1	0
246	Alcohol	D23	2	0
247	Alcohol	D24	2	3.62544
248	Alcohol	D25	2	0
249	Alcohol	D28	2	1.40682
250	Alcohol	D31	2	0
251	Alcohol	D34	2	0
252	Alcohol	D23	3	0.148733
253	Alcohol	D24	3	3.22892
254	Alcohol	D25	3	0
255	Alcohol	D28	3	1.81573
256	Alcohol	D31	3	0
257	Alcohol	D34	3	0
258	Alcohol	D23	4	0.743664
259	Alcohol	D24	4	2.21988
260	Alcohol	D25	4	0
261	Alcohol	D28	4	3.30722
262	Alcohol	D31	4	0
263	Alcohol	D34	4	0
264	Alcohol	D23	5	3.92342
265	Alcohol	D24	5	5.18249
266	Alcohol	D25	5	0
267	Alcohol	D28	5	5.14966
268	Alcohol	D31	5	0.213314
269	Alcohol	D34	5	0
270	Alcohol	D23	6	0.363495
271	Alcohol	D24	6	3.33209
272	Alcohol	D25	6	0
273	Alcohol	D28	6	2.76482
274	Alcohol	D31	6	3.67192
275	Alcohol	D34	6	0
276	Alcohol	D23	7	0.363495
277	Alcohol	D24	7	3.20393
278	Alcohol	D25	7	2.98066
279	Alcohol	D28	7	3.14184
280	Alcohol	D31	7	2.49414
281	Alcohol	D34	7	0
282	Alcohol	D23	8	1.76216
283	Alcohol	D24	8	3.21714
284	Alcohol	D25	8	2.81006
285	Alcohol	D28	8	2.9764
286	Alcohol	D31	8	3.36603
287	Alcohol	D34	8	0.0684046
288	Alcohol	D23	9	2.46703
289	Alcohol	D24	9	3.28023
290	Alcohol	D25	9	2.88211
291	Alcohol	D28	9	2.40645
292	Alcohol	D31	9	3.7095
293	Alcohol	D34	9	2.87299
294	Alcohol	D23	10	3.3687
295	Alcohol	D24	10	3.6381
296	Alcohol	D25	10	3.96448
297	Alcohol	D28	10	3.76017
298	Alcohol	D31	10	5.27053
299	Alcohol	D34	10	6.09678
300	Alcohol	D23	11	1.87863
301	Alcohol	D24	11	2.46017
302	Alcohol	D25	11	2.73707
303	Alcohol	D28	11	3.04361
304	Alcohol	D31	11	3.47866
305	Alcohol	D34	11	1.9754
306	Alcohol	D23	12	0.765368
307	Alcohol	D24	12	2.77558
308	Alcohol	D25	12	3.0178
309	Alcohol	D28	12	2.60881
310	Alcohol	D31	12	3.80684
311	Alcohol	D34	12	3.13339
312	Alcohol	D23	13	1.60721
313	Alcohol	D24	13	3.46947
314	Alcohol	D25	13	3.74644
315	Alcohol	D28	13	2.99767
316	Alcohol	D31	13	4.03643
317	Alcohol	D34	13	4.13637
318	Alcohol	D23	14	1.95661
319	Alcohol	D24	14	2.58633
320	Alcohol	D25	14	3.67833
321	Alcohol	D28	14	2.93649
322	Alcohol	D31	14	1.65427
323	Alcohol	D34	14	3.33578
324	Alcohol	D23	15	4.82907
325	Alcohol	D24	15	4.69456
326	Alcohol	D25	15	4.39644
327	Alcohol	D28	15	5.01651
328	Alcohol	D31	15	4.15182
329	Alcohol	D34	15	4.57594
330	Alcohol	D23	16	1.46746
331	Alcohol	D24	16	2.71225
332	Alcohol	D25	16	3.32551
333	Alcohol	D28	16	3.5824
334	Alcohol	D31	16	3.13778
335	Alcohol	D34	16	2.77733
336	Alcohol	D23	17	3.35418
337	Alcohol	D24	17	3.88346
338	Alcohol	D25	17	2.97911
339	Alcohol	D28	17	2.42875
340	Alcohol	D31	17	3.59538
341	Alcohol	D34	17	3.87535
342	Alcohol	D23	18	3.66294
343	Alcohol	D24	18	4.25031
344	Alcohol	D25	18	3.44934
345	Alcohol	D28	18	3.40025
346	Alcohol	D31	18	3.64605
347	Alcohol	D34	18	3.38561
348	Alcohol	D23	19	4.20559
349	Alcohol	D24	19	4.5539
350	Alcohol	D25	19	3.86326
351	Alcohol	D28	19	3.33953
352	Alcohol	D31	19	2.92986
353	Alcohol	D34	19	3.2554
354	Alcohol	D23	20	4.55313
355	Alcohol	D24	20	4.12887
356	Alcohol	D25	20	3.76225
357	Alcohol	D28	20	4.20534
358	Alcohol	D31	20	3.84472
359	Alcohol	D34	20	3.39319
360	Alcohol	D23	21	3.0098
361	Alcohol	D24	21	3.6763
362	Alcohol	D25	21	1.53074
363	Alcohol	D28	21	3.23041
364	Alcohol	D31	21	3.19132
365	Alcohol	D34	21	3.71265
366	Alcohol	D23	22	3.55704
367	Alcohol	D24	22	3.43523
368	Alcohol	D25	22	4.17473
369	Alcohol	D28	22	2.81166
370	Alcohol	D31	22	2.99984
371	Alcohol	D34	22	2.59885
372	Alcohol	D23	23	2.75804
373	Alcohol	D24	23	3.19416
374	Alcohol	D25	23	1.98513
375	Alcohol	D28	23	3.81456
376	Alcohol	D31	23	2.18237
377	Alcohol	D34	23	2.41069
378	Alcohol	D23	24	3.43073
379	Alcohol	D24	24	4.09817
380	Alcohol	D25	24	3.17621
381	Alcohol	D28	24	2.80132
382	Alcohol	D31	24	2.93061
383	Alcohol	D34	24	2.47096
384	Alcohol	D23	25	5.63007
385	Alcohol	D24	25	4.82138
386	Alcohol	D25	25	3.88268
387	Alcohol	D28	25	5.67709
388	Alcohol	D31	25	4.69456
389	Alcohol	D34	25	4.70084
390	Alcohol	D23	26	3.0816
391	Alcohol	D24	26	3.49088
392	Alcohol	D25	26	3.40249
393	Alcohol	D28	26	2.7217
394	Alcohol	D31	26	3.15575
395	Alcohol	D34	26	3.57615
396	Alcohol	D23	27	2.67965
397	Alcohol	D24	27	3.07671
398	Alcohol	D25	27	3.93622
399	Alcohol	D28	27	3.55005
400	Alcohol	D31	27	3.40326
401	Alcohol	D34	27	2.3841
402	Alcohol	D23	28	2.93549
403	Alcohol	D24	28	3.95128
404	Alcohol	D25	28	2.77918
405	Alcohol	D28	28	3.20675
406	Alcohol	D31	28	3.15575
407	Alcohol	D34	28	2.7739
408	Alcohol	D23	29	3.53593
409	Alcohol	D24	29	3.48643
410	Alcohol	D25	29	2.91152
411	Alcohol	D28	29	3.7412
412	Alcohol	D31	29	3.21763
413	Alcohol	D34	29	3.14375
414	Alcohol	D23	30	4.63197
415	Alcohol	D24	30	5.02923
416	Alcohol	D25	30	3.98542
417	Alcohol	D28	30	4.65723
418	Alcohol	D31	30	4.88832
419	Alcohol	D34	30	4.25031
424	Alcohol	E24	1	2.85274
425	Alcohol	E25	1	2.01679
430	Alcohol	E24	2	3.13105
431	Alcohol	E25	2	2.40463
436	Alcohol	E24	3	2.7928
437	Alcohol	E25	3	3.88172
442	Alcohol	E24	4	3.47398
443	Alcohol	E25	4	2.66392
448	Alcohol	E24	5	1.77105
449	Alcohol	E25	5	7.02266
454	Alcohol	E24	6	2.5145
455	Alcohol	E25	6	3.46345
460	Alcohol	E24	7	0.463197
461	Alcohol	E25	7	4.05297
466	Alcohol	E24	8	2.28797
467	Alcohol	E25	8	3.8704
472	Alcohol	E24	9	1.04593
473	Alcohol	E25	9	3.21317
478	Alcohol	E24	10	3.43692
479	Alcohol	E25	10	5.42777
484	Alcohol	E24	11	2.4741
485	Alcohol	E25	11	4.22919
490	Alcohol	E24	12	1.10684
491	Alcohol	E25	12	4.08821
496	Alcohol	E24	13	1.15341
497	Alcohol	E25	13	3.6337
502	Alcohol	E24	14	1.40973
503	Alcohol	E25	14	3.77346
507	Alcohol	E24	15	4.73992
508	Alcohol	E25	15	4.58827
513	Alcohol	E24	16	1.32988
514	Alcohol	E25	16	2.56342
519	Alcohol	E24	17	1.32988
520	Alcohol	E25	17	3.87977
525	Alcohol	E24	18	1.8437
526	Alcohol	E25	18	3.25594
531	Alcohol	E24	19	1.46225
532	Alcohol	E25	19	3.05245
537	Alcohol	E24	20	3.73633
538	Alcohol	E25	20	6.4172
543	Alcohol	E24	21	1.97086
544	Alcohol	E25	21	4.12052
549	Alcohol	E24	22	1.90728
550	Alcohol	E25	22	3.44503
555	Alcohol	E24	23	2.46017
556	Alcohol	E25	23	3.11004
561	Alcohol	E24	24	1.38779
562	Alcohol	E25	24	3.97026
567	Alcohol	E24	25	4.34802
568	Alcohol	E25	25	5.51335
573	Alcohol	E24	26	2.17401
574	Alcohol	E25	26	4.33192
579	Alcohol	E24	27	2.60881
580	Alcohol	E25	27	3.67557
585	Alcohol	E24	28	3.05885
586	Alcohol	E25	28	3.58788
591	Alcohol	E24	29	2.50825
592	Alcohol	E25	29	3.65432
597	Alcohol	E24	30	5.23958
598	Alcohol	E25	30	6.29718
