# Supplementary material for: The role of anterior insular cortex inputs to dorsolateral striatum in binge alcohol drinking
Source: eLife journal article supplement (doi:10.7554/elife.77411), 2022-07-28
Supplement: fig2-figsupp5-data1 [file Fig2S5A.xlsx]

## Sheet: Sheet1
	Fluid	Animal	Slice	Picrotoxin	Time min	PS Amplitude %
0	Alcohol	F88	1	No	1	96.6826
1	Alcohol	F88	1	No	2	95.6774
2	Alcohol	F88	1	No	3	102.212
3	Alcohol	F88	1	No	4	96.1209
4	Alcohol	F88	1	No	5	98.8114
5	Alcohol	F88	1	No	6	105.316
6	Alcohol	F88	1	No	7	96.8896
7	Alcohol	F88	1	No	8	97.2444
8	Alcohol	F88	1	No	9	98.161
9	Alcohol	F88	1	No	10	112.885
10	Alcohol	F88	1	No	11	180.267
11	Alcohol	F88	1	No	12	114.63
12	Alcohol	F88	1	No	13	83.6142
13	Alcohol	F88	1	No	14	71.5215
14	Alcohol	F88	1	No	15	72.7929
15	Alcohol	F88	1	No	16	67.7074
16	Alcohol	F88	1	No	17	65.2534
17	Alcohol	F88	1	No	18	67.2343
18	Alcohol	F88	1	No	19	77.76
19	Alcohol	F88	1	No	20	80.8645
20	Alcohol	F88	1	No	21	66.5248
21	Alcohol	F88	1	No	22	77.4939
22	Alcohol	F88	1	No	23	90.9763
23	Alcohol	F88	1	No	24	90.6806
24	Alcohol	F88	1	No	25	79.2679
25	Alcohol	F88	1	No	26	93.9625
26	Alcohol	F88	1	No	27	83.2594
27	Alcohol	F88	1	No	28	89.5571
28	Alcohol	F88	1	No	29	82.7864
29	Alcohol	F88	1	No	30	77.1096
30	Alcohol	F88	1	No	31	93.1346
31	Alcohol	F88	1	No	32	81.0715
32	Alcohol	F88	1	No	33	37.0173
33	Alcohol	F88	1	No	34	4.93761
34	Alcohol	F88	1	No	35	-5.20371
35	Alcohol	F88	1	No	36	-6.68204
36	Alcohol	F88	1	No	37	-6.17941
37	Alcohol	F88	1	No	38	-5.73591
38	Alcohol	F88	1	No	39	-8.63343
39	Alcohol	F88	1	No	40	-10.4961
40	Alcohol	F88	2	No	1	99.7977
41	Alcohol	F88	2	No	2	101.788
42	Alcohol	F88	2	No	3	98.2638
43	Alcohol	F88	2	No	4	100.189
44	Alcohol	F88	2	No	5	99.2102
45	Alcohol	F88	2	No	6	106.455
46	Alcohol	F88	2	No	7	98.1986
47	Alcohol	F88	2	No	8	94.1844
48	Alcohol	F88	2	No	9	102.865
49	Alcohol	F88	2	No	10	99.0471
50	Alcohol	F88	2	No	11	137.752
51	Alcohol	F88	2	No	12	115.724
52	Alcohol	F88	2	No	13	104.366
53	Alcohol	F88	2	No	14	96.0773
54	Alcohol	F88	2	No	15	76.332
55	Alcohol	F88	2	No	16	87.7572
56	Alcohol	F88	2	No	17	90.2689
57	Alcohol	F88	2	No	18	90.8881
58	Alcohol	F88	2	No	19	96.6972
59	Alcohol	F88	2	No	20	96.8274
60	Alcohol	F88	2	No	21	84.9788
61	Alcohol	F88	2	No	22	87.9193
62	Alcohol	F88	2	No	23	94.6753
63	Alcohol	F88	2	No	24	92.682
64	Alcohol	F88	2	No	25	90.8209
65	Alcohol	F88	2	No	26	94.3158
66	Alcohol	F88	2	No	27	102.084
67	Alcohol	F88	2	No	28	95.3618
68	Alcohol	F88	2	No	29	94.6092
69	Alcohol	F88	2	No	30	96.4375
70	Alcohol	F88	2	No	31	91.9304
71	Alcohol	F88	2	No	32	60.0482
72	Alcohol	F88	2	No	33	23.2372
73	Alcohol	F88	2	No	34	-4.53852
74	Alcohol	F88	2	No	35	-12.4017
75	Alcohol	F88	2	No	36	-16.155
76	Alcohol	F88	2	No	37	-18.015
77	Alcohol	F88	2	No	38	-19.6803
78	Alcohol	F88	2	No	39	-17.164
79	Alcohol	F88	2	No	40	-8.22607
80	Alcohol	F88	3	No	1	96.1111
81	Alcohol	F88	3	No	2	99.0092
82	Alcohol	F88	3	No	3	99.5821
83	Alcohol	F88	3	No	4	99.3462
84	Alcohol	F88	3	No	5	98.9755
85	Alcohol	F88	3	No	6	102.447
86	Alcohol	F88	3	No	7	102.177
87	Alcohol	F88	3	No	8	99.9191
88	Alcohol	F88	3	No	9	98.5711
89	Alcohol	F88	3	No	10	103.862
90	Alcohol	F88	3	No	11	189.492
91	Alcohol	F88	3	No	12	108.816
92	Alcohol	F88	3	No	13	99.6158
93	Alcohol	F88	3	No	14	93.0107
94	Alcohol	F88	3	No	15	92.8085
95	Alcohol	F88	3	No	16	95.7741
96	Alcohol	F88	3	No	17	95.8752
97	Alcohol	F88	3	No	18	96.347
98	Alcohol	F88	3	No	19	93.4151
99	Alcohol	F88	3	No	20	102.413
100	Alcohol	F88	3	No	21	101.941
101	Alcohol	F88	3	No	22	103.289
102	Alcohol	F88	3	No	23	105.581
103	Alcohol	F88	3	No	24	103.121
104	Alcohol	F88	3	No	25	68.8481
105	Alcohol	F88	3	No	26	103.491
106	Alcohol	F88	3	No	27	105.884
107	Alcohol	F88	3	No	28	104.233
108	Alcohol	F88	3	No	29	107.704
109	Alcohol	F88	3	No	30	112.321
110	Alcohol	F88	3	No	31	108.041
111	Alcohol	F88	3	No	32	99.9865
112	Alcohol	F88	3	No	33	58.1317
113	Alcohol	F88	3	No	34	14.693
114	Alcohol	F88	3	No	35	2.56116
115	Alcohol	F88	3	No	36	0.134798
116	Alcohol	F88	3	No	37	-2.46007
117	Alcohol	F88	3	No	38	-6.47031
118	Alcohol	F88	3	No	39	-15.3333
119	Alcohol	F88	3	No	40	-11.2556
120	Water	F85	1	No	1	90.3698
121	Water	F85	1	No	2	97.1247
122	Water	F85	1	No	3	102.587
123	Water	F85	1	No	4	98.0352
124	Water	F85	1	No	5	104.643
125	Water	F85	1	No	6	106.64
126	Water	F85	1	No	7	101.413
127	Water	F85	1	No	8	99.1219
128	Water	F85	1	No	9	102.999
129	Water	F85	1	No	10	97.066
130	Water	F85	1	No	11	185.614
131	Water	F85	1	No	12	136.391
132	Water	F85	1	No	13	114.159
133	Water	F85	1	No	14	91.9841
134	Water	F85	1	No	15	90.0753
135	Water	F85	1	No	16	93.8373
136	Water	F85	1	No	17	95.9507
137	Water	F85	1	No	18	86.2275
138	Water	F85	1	No	19	88.8418
139	Water	F85	1	No	20	94.4831
140	Water	F85	1	No	21	94.6861
141	Water	F85	1	No	22	85.4347
142	Water	F85	1	No	23	97.3301
143	Water	F85	1	No	24	93.013
144	Water	F85	1	No	25	88.6966
145	Water	F85	1	No	26	89.3738
146	Water	F85	1	No	27	87.4032
147	Water	F85	1	No	28	94.0122
148	Water	F85	1	No	29	87.9019
149	Water	F85	1	No	30	96.8311
150	Water	F85	1	No	31	93.5127
151	Water	F85	1	No	32	66.5223
152	Water	F85	1	No	33	13.1869
153	Water	F85	1	No	34	-2.43822
154	Water	F85	1	No	35	-5.58053
155	Water	F85	1	No	36	-4.78677
156	Water	F85	1	No	37	-6.16707
157	Water	F85	1	No	38	-8.75086
158	Water	F85	1	No	39	-20.1181
159	Water	F85	1	No	40	-21.3803
160	Water	F85	2	No	1	93.8665
161	Water	F85	2	No	2	90.8385
162	Water	F85	2	No	3	95.6133
163	Water	F85	2	No	4	96.4674
164	Water	F85	2	No	5	101.009
165	Water	F85	2	No	6	101.281
166	Water	F85	2	No	7	101.514
167	Water	F85	2	No	8	97.9425
168	Water	F85	2	No	9	105.668
169	Water	F85	2	No	10	115.8
170	Water	F85	2	No	11	400.272
171	Water	F85	2	No	12	178.144
172	Water	F85	2	No	13	78.4938
173	Water	F85	2	No	14	65.6444
174	Water	F85	2	No	15	62.8106
175	Water	F85	2	No	16	64.7127
176	Water	F85	2	No	17	67.2748
177	Water	F85	2	No	18	69.604
178	Water	F85	2	No	19	73.2531
179	Water	F85	2	No	20	78.1444
180	Water	F85	2	No	21	74.4565
181	Water	F85	2	No	22	72.5932
182	Water	F85	2	No	23	81.9876
183	Water	F85	2	No	24	73.1755
184	Water	F85	2	No	25	84.1227
185	Water	F85	2	No	26	84.4721
186	Water	F85	2	No	27	78.6491
187	Water	F85	2	No	28	81.2112
188	Water	F85	2	No	29	78.6879
189	Water	F85	2	No	30	85.4037
190	Water	F85	2	No	31	76.6304
191	Water	F85	2	No	32	52.5621
192	Water	F85	2	No	33	6.25
193	Water	F85	2	No	34	-4.50311
194	Water	F85	2	No	35	-6.25
195	Water	F85	2	No	36	-6.0559
196	Water	F85	2	No	37	-6.32764
197	Water	F85	2	No	38	-5.39596
198	Water	F85	2	No	39	-5.00776
199	Water	F85	2	No	40	-1.66925
200	Water	F85	3	No	1	94.865
201	Water	F85	3	No	2	91.1023
202	Water	F85	3	No	3	95.6175
203	Water	F85	3	No	4	98.0522
204	Water	F85	3	No	5	99.9557
205	Water	F85	3	No	6	104.205
206	Water	F85	3	No	7	98.2293
207	Water	F85	3	No	8	107.039
208	Water	F85	3	No	9	100.221
209	Water	F85	3	No	10	110.713
210	Water	F85	3	No	11	310.403
211	Water	F85	3	No	12	112.439
212	Water	F85	3	No	13	82.0274
213	Water	F85	3	No	14	86.0115
214	Water	F85	3	No	15	85.3475
215	Water	F85	3	No	16	73.1297
216	Water	F85	3	No	17	79.1501
217	Water	F85	3	No	18	78.5746
218	Water	F85	3	No	19	82.2488
219	Water	F85	3	No	20	60.6463
220	Water	F85	3	No	21	60.6906
221	Water	F85	3	No	22	79.3271
222	Water	F85	3	No	23	79.0615
223	Water	F85	3	No	24	92.4745
224	Water	F85	3	No	25	95.5733
225	Water	F85	3	No	26	82.3816
226	Water	F85	3	No	27	86.6312
227	Water	F85	3	No	28	88.1363
228	Water	F85	3	No	29	92.3417
229	Water	F85	3	No	30	94.7322
230	Water	F85	3	No	31	90.5268
231	Water	F85	3	No	32	101.284
232	Water	F85	3	No	33	71.2262
233	Water	F85	3	No	34	9.82736
234	Water	F85	3	No	35	-16.0248
235	Water	F85	3	No	36	-16.2019
236	Water	F85	3	No	37	-19.3448
237	Water	F85	3	No	38	-27.6228
238	Water	F85	3	No	39	-40.0177
239	Water	F85	3	No	40	-42.718
240	Alcohol	F86	1	No	1	97.126
241	Alcohol	F86	1	No	2	93.4534
242	Alcohol	F86	1	No	3	103.416
243	Alcohol	F86	1	No	4	99.5367
244	Alcohol	F86	1	No	5	100.949
245	Alcohol	F86	1	No	6	98.5762
246	Alcohol	F86	1	No	7	102.23
247	Alcohol	F86	1	No	8	97.7475
248	Alcohol	F86	1	No	9	104.565
249	Alcohol	F86	1	No	10	102.399
250	Alcohol	F86	1	No	11	142.327
251	Alcohol	F86	1	No	12	102.324
252	Alcohol	F86	1	No	13	96.8435
253	Alcohol	F86	1	No	14	87.5772
254	Alcohol	F86	1	No	15	89.4794
255	Alcohol	F86	1	No	16	86.8615
256	Alcohol	F86	1	No	17	96.7869
257	Alcohol	F86	1	No	18	97.0883
258	Alcohol	F86	1	No	19	99.499
259	Alcohol	F86	1	No	20	95.1484
260	Alcohol	F86	1	No	21	104.207
261	Alcohol	F86	1	No	22	109.274
262	Alcohol	F86	1	No	23	106.223
263	Alcohol	F86	1	No	24	105.921
264	Alcohol	F86	1	No	25	111.929
265	Alcohol	F86	1	No	26	114.02
266	Alcohol	F86	1	No	27	111.76
267	Alcohol	F86	1	No	28	108.389
268	Alcohol	F86	1	No	29	113.945
269	Alcohol	F86	1	No	30	116.77
270	Alcohol	F86	1	No	31	113.794
271	Alcohol	F86	1	No	32	111.364
272	Alcohol	F86	1	No	33	53.8647
273	Alcohol	F86	1	No	34	18.25
274	Alcohol	F86	1	No	35	5.19813
275	Alcohol	F86	1	No	36	2.37306
276	Alcohol	F86	1	No	37	1.37487
277	Alcohol	F86	1	No	38	-2.03405
278	Alcohol	F86	1	No	39	-7.7972
279	Alcohol	F86	1	No	40	-11.7523
280	Alcohol	F86	2	No	1	96.7544
281	Alcohol	F86	2	No	2	106.859
282	Alcohol	F86	2	No	3	85.6808
283	Alcohol	F86	2	No	4	92.8761
284	Alcohol	F86	2	No	5	89.6101
285	Alcohol	F86	2	No	6	105.43
286	Alcohol	F86	2	No	7	108.696
287	Alcohol	F86	2	No	8	117.269
288	Alcohol	F86	2	No	9	100.99
289	Alcohol	F86	2	No	10	95.8359
290	Alcohol	F86	2	No	11	268.779
291	Alcohol	F86	2	No	12	116.912
292	Alcohol	F86	2	No	13	69.7591
293	Alcohol	F86	2	No	14	69.453
294	Alcohol	F86	2	No	15	58.5834
295	Alcohol	F86	2	No	16	64.503
296	Alcohol	F86	2	No	17	62.3086
297	Alcohol	F86	2	No	18	64.3499
298	Alcohol	F86	2	No	19	65.0643
299	Alcohol	F86	2	No	20	63.6354
300	Alcohol	F86	2	No	21	62.3086
301	Alcohol	F86	2	No	22	56.5421
302	Alcohol	F86	2	No	23	66.4421
303	Alcohol	F86	2	No	24	69.7591
304	Alcohol	F86	2	No	25	60.8287
305	Alcohol	F86	2	No	26	62.921
306	Alcohol	F86	2	No	27	66.6463
307	Alcohol	F86	2	No	28	66.6973
308	Alcohol	F86	2	No	29	67.0545
309	Alcohol	F86	2	No	30	68.0751
310	Alcohol	F86	2	No	31	61.237
311	Alcohol	F86	2	No	32	45.5705
312	Alcohol	F86	2	No	33	5.71545
313	Alcohol	F86	2	No	34	-10.2572
314	Alcohol	F86	2	No	35	-11.6861
315	Alcohol	F86	2	No	36	-19.4938
316	Alcohol	F86	2	No	37	-16.3809
317	Alcohol	F86	2	No	38	-21.9943
318	Alcohol	F86	2	No	39	-24.75
319	Alcohol	F86	2	No	40	-28.3221
320	Alcohol	F86	3	No	1	90.0824
321	Alcohol	F86	3	No	2	97.9445
322	Alcohol	F86	3	No	3	90.5087
323	Alcohol	F86	3	No	4	94.0135
324	Alcohol	F86	3	No	5	103.438
325	Alcohol	F86	3	No	6	96.9973
326	Alcohol	F86	3	No	7	105.001
327	Alcohol	F86	3	No	8	101.639
328	Alcohol	F86	3	No	9	113.053
329	Alcohol	F86	3	No	10	107.322
330	Alcohol	F86	3	No	11	154.826
331	Alcohol	F86	3	No	12	102.397
332	Alcohol	F86	3	No	13	83.4517
333	Alcohol	F86	3	No	14	75.5897
334	Alcohol	F86	3	No	15	102.16
335	Alcohol	F86	3	No	16	91.8348
336	Alcohol	F86	3	No	17	100.076
337	Alcohol	F86	3	No	18	111.443
338	Alcohol	F86	3	No	19	97.7077
339	Alcohol	F86	3	No	20	90.9823
340	Alcohol	F86	3	No	21	92.4979
341	Alcohol	F86	3	No	22	98.0392
342	Alcohol	F86	3	No	23	91.8348
343	Alcohol	F86	3	No	24	95.2449
344	Alcohol	F86	3	No	25	78.0525
345	Alcohol	F86	3	No	26	76.8211
346	Alcohol	F86	3	No	27	81.6046
347	Alcohol	F86	3	No	28	77.863
348	Alcohol	F86	3	No	29	89.6088
349	Alcohol	F86	3	No	30	110.922
350	Alcohol	F86	3	No	31	115.137
351	Alcohol	F86	3	No	32	109.738
352	Alcohol	F86	3	No	33	47.0778
353	Alcohol	F86	3	No	34	13.8771
354	Alcohol	F86	3	No	35	-0.663067
355	Alcohol	F86	3	No	36	4.3573
356	Alcohol	F86	3	No	37	-10.2302
357	Alcohol	F86	3	No	38	-12.693
358	Alcohol	F86	3	No	39	-21.1234
359	Alcohol	F86	3	No	40	-25.1018
360	Water	F82	1	No	1	94.6723
362	Water	F82	1	No	3	101.491
363	Water	F82	1	No	4	104.35
364	Water	F82	1	No	5	106.588
365	Water	F82	1	No	6	105.383
366	Water	F82	1	No	7	98.805
367	Water	F82	1	No	8	112.133
368	Water	F82	1	No	9	118.125
369	Water	F82	1	No	10	110.066
370	Water	F82	1	No	11	249.303
371	Water	F82	1	No	12	174.605
372	Water	F82	1	No	13	116.093
373	Water	F82	1	No	14	109.206
374	Water	F82	1	No	15	94.5001
375	Water	F82	1	No	16	96.6698
376	Water	F82	1	No	17	105.142
377	Water	F82	1	No	18	109.757
378	Water	F82	1	No	19	109.86
379	Water	F82	1	No	20	109.998
380	Water	F82	1	No	21	108.172
381	Water	F82	1	No	22	107.552
382	Water	F82	1	No	23	118.607
383	Water	F82	1	No	24	122.499
384	Water	F82	1	No	25	124.393
385	Water	F82	1	No	26	129.249
386	Water	F82	1	No	27	117.919
387	Water	F82	1	No	28	137.376
388	Water	F82	1	No	29	121.19
389	Water	F82	1	No	30	127.665
390	Water	F82	1	No	31	136.068
391	Water	F82	1	No	32	130.179
392	Water	F82	1	No	33	67.1213
393	Water	F82	1	No	34	8.98853
394	Water	F82	1	No	35	-15.6008
395	Water	F82	1	No	36	-21.4554
396	Water	F82	1	No	37	-25.4159
397	Water	F82	1	No	38	-27.861
398	Water	F82	1	No	39	-28.5498
399	Water	F82	1	No	40	-16.6339
400	Water	F82	2	No	1	109.663
401	Water	F82	2	No	2	116.502
402	Water	F82	2	No	3	88.2353
403	Water	F82	2	No	4	98.6263
404	Water	F82	2	No	5	93.1666
405	Water	F82	2	No	6	96.8357
406	Water	F82	2	No	7	94.2233
407	Water	F82	2	No	8	104.526
408	Water	F82	2	No	9	94.9571
409	Water	F82	2	No	10	103.264
410	Water	F82	2	No	11	241.165
411	Water	F82	2	No	12	175.296
412	Water	F82	2	No	13	115.328
413	Water	F82	2	No	14	82.2179
414	Water	F82	2	No	15	77.8737
415	Water	F82	2	No	16	81.0144
416	Water	F82	2	No	17	82.0711
417	Water	F82	2	No	18	90.7303
418	Water	F82	2	No	19	87.296
419	Water	F82	2	No	20	96.4248
420	Water	F82	2	No	21	100.593
421	Water	F82	2	No	22	86.2393
422	Water	F82	2	No	23	88.6756
423	Water	F82	2	No	24	92.697
424	Water	F82	2	No	25	103.704
425	Water	F82	2	No	26	94.8397
426	Water	F82	2	No	27	98.8318
427	Water	F82	2	No	28	106.64
428	Water	F82	2	No	29	108.959
429	Water	F82	2	No	30	100.505
430	Water	F82	2	No	31	102.031
431	Water	F82	2	No	32	96.7183
432	Water	F82	2	No	33	53.1877
433	Water	F82	2	No	34	19.784
434	Water	F82	2	No	35	2.26019
435	Water	F82	2	No	36	-1.67312
436	Water	F82	2	No	37	-6.95667
437	Water	F82	2	No	38	-12.475
438	Water	F82	2	No	39	-15.8507
439	Water	F82	2	No	40	-10.7726
440	Water	F84	1	No	1	99.3189
441	Water	F84	1	No	2	102.222
442	Water	F84	1	No	3	103.115
443	Water	F84	1	No	4	102.222
444	Water	F84	1	No	5	96.5833
445	Water	F84	1	No	6	96.5275
446	Water	F84	1	No	7	101.72
447	Water	F84	1	No	8	96.4716
448	Water	F84	1	No	9	101.887
449	Water	F84	1	No	10	99.933
450	Water	F84	1	No	11	142.028
451	Water	F84	1	No	12	103.729
452	Water	F84	1	No	13	93.8477
453	Water	F84	1	No	14	90.9446
454	Water	F84	1	No	15	94.406
455	Water	F84	1	No	16	86.4225
456	Water	F84	1	No	17	89.3256
457	Water	F84	1	No	18	87.5949
458	Water	F84	1	No	19	88.5998
459	Water	F84	1	No	20	80.393
460	Water	F84	1	No	21	83.5194
461	Water	F84	1	No	22	92.8428
462	Water	F84	1	No	23	88.209
463	Water	F84	1	No	24	88.209
464	Water	F84	1	No	25	82.7378
465	Water	F84	1	No	26	84.5802
466	Water	F84	1	No	27	85.0268
467	Water	F84	1	No	28	83.9661
468	Water	F84	1	No	29	86.7017
469	Water	F84	1	No	30	89.1581
470	Water	F84	1	No	31	86.4225
471	Water	F84	1	No	32	57.6708
472	Water	F84	1	No	33	4.35462
473	Water	F84	1	No	34	-10.6632
474	Water	F84	1	No	35	-14.962
475	Water	F84	1	No	36	-14.962
476	Water	F84	1	No	37	-18.5909
477	Water	F84	1	No	38	-15.2412
478	Water	F84	1	No	39	-13.7896
479	Water	F84	1	No	40	-9.37919
480	Water	F84	2	No	1	97.0083
481	Water	F84	2	No	2	92.4347
482	Water	F84	2	No	3	101.754
483	Water	F84	2	No	4	106.19
484	Water	F84	2	No	5	101.788
485	Water	F84	2	No	6	100.206
486	Water	F84	2	No	7	103.439
487	Water	F84	2	No	8	100.309
488	Water	F84	2	No	9	99.0715
489	Water	F84	2	No	10	97.7992
490	Water	F84	2	No	11	145.84
491	Water	F84	2	No	12	104.781
492	Water	F84	2	No	13	96.1139
493	Water	F84	2	No	14	90.957
494	Water	F84	2	No	15	94.875
495	Water	F84	2	No	16	94.2572
496	Water	F84	2	No	17	94.2228
497	Water	F84	2	No	18	90.9909
498	Water	F84	2	No	19	98.1077
499	Water	F84	2	No	20	92.5721
500	Water	F84	2	No	21	96.2523
501	Water	F84	2	No	22	93.6737
502	Water	F84	2	No	23	96.2512
503	Water	F84	2	No	24	96.939
504	Water	F84	2	No	25	93.9847
505	Water	F84	2	No	26	91.7115
506	Water	F84	2	No	27	99.2784
507	Water	F84	2	No	28	94.0513
508	Water	F84	2	No	29	97.2477
509	Water	F84	2	No	30	93.6039
510	Water	F84	2	No	31	86.3491
511	Water	F84	2	No	32	94.3266
512	Water	F84	2	No	33	74.5567
513	Water	F84	2	No	34	25.9629
514	Water	F84	2	No	35	0.996935
515	Water	F84	2	No	36	-5.36411
516	Water	F84	2	No	37	-4.40442
517	Water	F84	2	No	38	-8.15151
518	Water	F84	2	No	39	-11.4161
519	Water	F84	2	No	40	-10.6951
520	Water	F84	3	No	1	100.135
521	Water	F84	3	No	2	102.205
522	Water	F84	3	No	3	102.354
523	Water	F84	3	No	4	101.955
524	Water	F84	3	No	5	102.529
525	Water	F84	3	No	6	97.7155
526	Water	F84	3	No	7	101.731
527	Water	F84	3	No	8	102.28
528	Water	F84	3	No	9	93.3011
529	Water	F84	3	No	10	95.7951
530	Water	F84	3	No	11	148.494
531	Water	F84	3	No	12	108.39
532	Water	F84	3	No	13	89.7596
533	Water	F84	3	No	14	95.5956
534	Water	F84	3	No	15	89.7845
535	Water	F84	3	No	16	86.0435
536	Water	F84	3	No	17	85.2205
537	Water	F84	3	No	18	83.8737
538	Water	F84	3	No	19	87.9639
539	Water	F84	3	No	20	84.4972
540	Water	F84	3	No	21	81.679
541	Water	F84	3	No	22	84.0982
542	Water	F84	3	No	23	87.066
543	Water	F84	3	No	24	88.313
544	Water	F84	3	No	25	88.2632
545	Water	F84	3	No	26	87.9639
546	Water	F84	3	No	27	87.1658
547	Water	F84	3	No	28	87.7394
548	Water	F84	3	No	29	84.6219
549	Water	F84	3	No	30	85.6694
550	Water	F84	3	No	31	84.572
551	Water	F84	3	No	32	75.0449
552	Water	F84	3	No	33	28.6063
553	Water	F84	3	No	34	1.79569
554	Water	F84	3	No	35	-4.91321
555	Water	F84	3	No	36	-7.4571
556	Water	F84	3	No	37	-7.3324
557	Water	F84	3	No	38	-9.60196
558	Water	F84	3	No	39	-14.2658
559	Water	F84	3	No	40	-13.2682
1320	Water	G7	1	No	1	94.1123
1321	Water	G7	1	No	2	93.0018
1322	Water	G7	1	No	3	95.1965
1323	Water	G7	1	No	4	95.3283
1324	Water	G7	1	No	5	98.37
1325	Water	G7	1	No	6	97.9484
1326	Water	G7	1	No	7	110.066
1327	Water	G7	1	No	8	108.406
1328	Water	G7	1	No	9	106.298
1329	Water	G7	1	No	10	101.272
1330	Water	G7	1	No	11	223.186
1331	Water	G7	1	No	12	124.299
1332	Water	G7	1	No	13	86.4983
1333	Water	G7	1	No	14	75.1395
1334	Water	G7	1	No	15	61.2755
1335	Water	G7	1	No	16	69.7879
1336	Water	G7	1	No	17	66.3326
1337	Water	G7	1	No	18	67.0799
1338	Water	G7	1	No	19	63.6139
1339	Water	G7	1	No	20	76.2848
1340	Water	G7	1	No	21	79.4903
1341	Water	G7	1	No	22	85.1136
1342	Water	G7	1	No	23	88.1276
1343	Water	G7	1	No	24	89.3362
1344	Water	G7	1	No	25	89.3817
1345	Water	G7	1	No	26	96.3084
1346	Water	G7	1	No	27	91.5941
1347	Water	G7	1	No	28	98.7325
1348	Water	G7	1	No	29	99.1654
1349	Water	G7	1	No	30	110.366
1350	Water	G7	1	No	31	105.42
1351	Water	G7	1	No	32	98.3736
1352	Water	G7	1	No	33	54.6809
1353	Water	G7	1	No	34	10.5106
1354	Water	G7	1	No	35	-3.40475
1355	Water	G7	1	No	36	-2.52193
1356	Water	G7	1	No	37	-2.00551
1357	Water	G7	1	No	38	-3.76052
1358	Water	G7	1	No	39	-5.47254
1359	Water	G7	1	No	40	-4.28077
1360	Water	G7	2	No	1	116.616
1361	Water	G7	2	No	2	105.643
1362	Water	G7	2	No	3	90.7431
1363	Water	G7	2	No	4	108.638
1364	Water	G7	2	No	5	99.821
1365	Water	G7	2	No	6	101.731
1366	Water	G7	2	No	7	96.4732
1367	Water	G7	2	No	8	93.6328
1368	Water	G7	2	No	9	94.972
1369	Water	G7	2	No	10	91.7299
1370	Water	G7	2	No	11	107.2
1371	Water	G7	2	No	12	97.2696
1372	Water	G7	2	No	13	72.9187
1373	Water	G7	2	No	14	71.8051
1374	Water	G7	2	No	15	68.4996
1375	Water	G7	2	No	16	68.2247
1376	Water	G7	2	No	17	76.8304
1377	Water	G7	2	No	18	72.9187
1378	Water	G7	2	No	19	72.5663
1379	Water	G7	2	No	20	70.3885
1380	Water	G7	2	No	21	82.3701
1381	Water	G7	2	No	22	77.9792
1382	Water	G7	2	No	23	77.803
1383	Water	G7	2	No	24	76.4427
1384	Water	G7	2	No	25	77.7889
1385	Water	G7	2	No	26	88.1706
1386	Water	G7	2	No	27	90.8771
1387	Water	G7	2	No	28	85.2668
1388	Water	G7	2	No	29	87.1557
1389	Water	G7	2	No	30	99.8069
1390	Water	G7	2	No	31	99.1444
1391	Water	G7	2	No	32	81.5807
1392	Water	G7	2	No	33	27.2194
1393	Water	G7	2	No	34	-5.71594
1394	Water	G7	2	No	35	-16.5064
1395	Water	G7	2	No	36	-19.8331
1396	Water	G7	2	No	37	-13.6097
1397	Water	G7	2	No	38	-16.5487
1398	Water	G7	2	No	39	-18.4446
1399	Water	G7	2	No	40	-11.5517
1400	Water	G7	3	No	1	97.0306
1401	Water	G7	3	No	2	102.63
1402	Water	G7	3	No	3	105.473
1403	Water	G7	3	No	4	101.109
1404	Water	G7	3	No	5	93.211
1405	Water	G7	3	No	6	100.576
1406	Water	G7	3	No	7	97.265
1407	Water	G7	3	No	8	97.5592
1408	Water	G7	3	No	9	99.6185
1409	Water	G7	3	No	10	105.527
1410	Water	G7	3	No	11	371.931
1411	Water	G7	3	No	12	215.144
1412	Water	G7	3	No	13	106.071
1413	Water	G7	3	No	14	65.4616
1414	Water	G7	3	No	15	65.9254
1415	Water	G7	3	No	16	66.3991
1416	Water	G7	3	No	17	69.3909
1417	Water	G7	3	No	18	73.8338
1418	Water	G7	3	No	19	69.4158
1419	Water	G7	3	No	20	65.9353
1420	Water	G7	3	No	21	69.74
1421	Water	G7	3	No	22	69.0768
1422	Water	G7	3	No	23	73.7091
1423	Water	G7	3	No	24	61.5124
1424	Water	G7	3	No	25	66.6534
1425	Water	G7	3	No	26	63.8909
1426	Water	G7	3	No	27	66.3492
1427	Water	G7	3	No	28	63.7563
1428	Water	G7	3	No	29	64.0754
1429	Water	G7	3	No	30	67.6955
1430	Water	G7	3	No	31	59.3832
1431	Water	G7	3	No	32	61.7667
1432	Water	G7	3	No	33	17.2231
1433	Water	G7	3	No	34	1.12693
1434	Water	G7	3	No	35	-0.373981
1435	Water	G7	3	No	36	0.418859
1436	Water	G7	3	No	37	0.623302
1437	Water	G7	3	No	38	-3.52539
1438	Water	G7	3	No	39	-0.0149592
1439	Water	G7	3	No	40	-3.7797
1440	Alcohol	G6	1	No	1	116.313
1441	Alcohol	G6	1	No	2	102.489
1442	Alcohol	G6	1	No	3	98.8137
1443	Alcohol	G6	1	No	4	107.56
1444	Alcohol	G6	1	No	5	98.5902
1445	Alcohol	G6	1	No	6	105.624
1446	Alcohol	G6	1	No	7	99.9311
1447	Alcohol	G6	1	No	8	96.3741
1448	Alcohol	G6	1	No	9	88.7697
1449	Alcohol	G6	1	No	10	85.5355
1450	Alcohol	G6	1	No	11	181.779
1451	Alcohol	G6	1	No	12	116.114
1452	Alcohol	G6	1	No	13	83.1456
1453	Alcohol	G6	1	No	14	69.8115
1454	Alcohol	G6	1	No	15	67.6698
1455	Alcohol	G6	1	No	16	66.3166
1456	Alcohol	G6	1	No	17	58.141
1457	Alcohol	G6	1	No	18	62.592
1458	Alcohol	G6	1	No	19	63.9452
1459	Alcohol	G6	1	No	20	69.6501
1460	Alcohol	G6	1	No	21	71.5434
1461	Alcohol	G6	1	No	22	66.9684
1462	Alcohol	G6	1	No	23	62.0891
1463	Alcohol	G6	1	No	24	62.3995
1464	Alcohol	G6	1	No	25	59.4695
1465	Alcohol	G6	1	No	26	63.579
1466	Alcohol	G6	1	No	27	68.452
1467	Alcohol	G6	1	No	28	66.7387
1468	Alcohol	G6	1	No	29	66.0558
1469	Alcohol	G6	1	No	30	64.566
1470	Alcohol	G6	1	No	31	66.4097
1471	Alcohol	G6	1	No	32	72.8656
1472	Alcohol	G6	1	No	33	56.9181
1473	Alcohol	G6	1	No	34	11.6146
1474	Alcohol	G6	1	No	35	-8.27483
1475	Alcohol	G6	1	No	36	-16.0096
1476	Alcohol	G6	1	No	37	-15.6371
1477	Alcohol	G6	1	No	38	-12.2539
1478	Alcohol	G6	1	No	39	-15.5688
1479	Alcohol	G6	1	No	40	-14.6563
1480	Alcohol	G6	2	No	1	105.684
1481	Alcohol	G6	2	No	2	100.898
1482	Alcohol	G6	2	No	3	109.981
1483	Alcohol	G6	2	No	4	105.369
1484	Alcohol	G6	2	No	5	91.5465
1485	Alcohol	G6	2	No	6	95.3328
1486	Alcohol	G6	2	No	7	102.052
1487	Alcohol	G6	2	No	8	92.8603
1488	Alcohol	G6	2	No	9	95.7844
1489	Alcohol	G6	2	No	10	100.492
1490	Alcohol	G6	2	No	11	159.276
1491	Alcohol	G6	2	No	12	125.938
1492	Alcohol	G6	2	No	13	84.6947
1493	Alcohol	G6	2	No	14	73.4087
1494	Alcohol	G6	2	No	15	78.7324
1495	Alcohol	G6	2	No	16	82.0944
1496	Alcohol	G6	2	No	17	79.2114
1497	Alcohol	G6	2	No	18	85.3379
1498	Alcohol	G6	2	No	19	89.4344
1499	Alcohol	G6	2	No	20	91.9981
1500	Alcohol	G6	2	No	21	95.1731
1501	Alcohol	G6	2	No	22	98.8408
1502	Alcohol	G6	2	No	23	108.38
1503	Alcohol	G6	2	No	24	109.36
1504	Alcohol	G6	2	No	25	110.902
1505	Alcohol	G6	2	No	26	109.63
1506	Alcohol	G6	2	No	27	119.264
1507	Alcohol	G6	2	No	28	118.229
1508	Alcohol	G6	2	No	29	116.153
1509	Alcohol	G6	2	No	30	124.405
1510	Alcohol	G6	2	No	31	124.547
1511	Alcohol	G6	2	No	32	97.0891
1512	Alcohol	G6	2	No	33	25.5234
1513	Alcohol	G6	2	No	34	4.5755
1514	Alcohol	G6	2	No	35	2.35846
1515	Alcohol	G6	2	No	36	3.16134
1516	Alcohol	G6	2	No	37	-1.06746
1517	Alcohol	G6	2	No	38	3.90948
1518	Alcohol	G6	2	No	39	-0.415125
1519	Alcohol	G6	2	No	40	1.84754
1520	Alcohol	G6	3	No	1	98.7495
1521	Alcohol	G6	3	No	2	99.4334
1522	Alcohol	G6	3	No	3	97.2772
1523	Alcohol	G6	3	No	4	99.4984
1524	Alcohol	G6	3	No	5	96.2881
1525	Alcohol	G6	3	No	6	100.024
1526	Alcohol	G6	3	No	7	100.682
1527	Alcohol	G6	3	No	8	100.196
1528	Alcohol	G6	3	No	9	106.137
1529	Alcohol	G6	3	No	10	101.714
1530	Alcohol	G6	3	No	11	156.577
1531	Alcohol	G6	3	No	12	119.136
1532	Alcohol	G6	3	No	13	93.0327
1533	Alcohol	G6	3	No	14	76.6422
1534	Alcohol	G6	3	No	15	68.967
1535	Alcohol	G6	3	No	16	75.4525
1536	Alcohol	G6	3	No	17	72.8216
1537	Alcohol	G6	3	No	18	74.7008
1538	Alcohol	G6	3	No	19	74.1356
1539	Alcohol	G6	3	No	20	72.3581
1540	Alcohol	G6	3	No	21	71.0214
1541	Alcohol	G6	3	No	22	77.2837
1542	Alcohol	G6	3	No	23	72.2648
1543	Alcohol	G6	3	No	24	72.3892
1544	Alcohol	G6	3	No	25	72.9148
1545	Alcohol	G6	3	No	26	70.3319
1546	Alcohol	G6	3	No	27	71.3266
1547	Alcohol	G6	3	No	28	72.9289
1548	Alcohol	G6	3	No	29	72.1038
1549	Alcohol	G6	3	No	30	77.4109
1550	Alcohol	G6	3	No	31	75.9386
1551	Alcohol	G6	3	No	32	58.2058
1552	Alcohol	G6	3	No	33	1.94424
1553	Alcohol	G6	3	No	34	-7.94088
1554	Alcohol	G6	3	No	35	-7.14962
1555	Alcohol	G6	3	No	36	-9.30863
1556	Alcohol	G6	3	No	37	-8.22913
1557	Alcohol	G6	3	No	38	-13.1802
1558	Alcohol	G6	3	No	39	-10.4757
1559	Alcohol	G6	3	No	40	-10.4305
1560	Alcohol	G6	4	No	1	92.8971
1561	Alcohol	G6	4	No	2	92.3286
1562	Alcohol	G6	4	No	3	97.749
1563	Alcohol	G6	4	No	4	101.794
1564	Alcohol	G6	4	No	5	102.974
1565	Alcohol	G6	4	No	6	101.607
1566	Alcohol	G6	4	No	7	100.661
1567	Alcohol	G6	4	No	8	108.069
1568	Alcohol	G6	4	No	9	104.844
1569	Alcohol	G6	4	No	10	97.0763
1570	Alcohol	G6	4	No	11	147.287
1571	Alcohol	G6	4	No	12	89.5425
1572	Alcohol	G6	4	No	13	58.0574
1573	Alcohol	G6	4	No	14	52.6891
1574	Alcohol	G6	4	No	15	55.0934
1575	Alcohol	G6	4	No	16	53.9737
1576	Alcohol	G6	4	No	17	50.0072
1577	Alcohol	G6	4	No	18	55.2019
1578	Alcohol	G6	4	No	19	56.6427
1579	Alcohol	G6	4	No	20	56.213
1580	Alcohol	G6	4	No	21	56.634
1581	Alcohol	G6	4	No	22	57.7016
1582	Alcohol	G6	4	No	23	64.7103
1583	Alcohol	G6	4	No	24	61.0258
1584	Alcohol	G6	4	No	25	59.802
1585	Alcohol	G6	4	No	26	58.1616
1586	Alcohol	G6	4	No	27	65.7041
1587	Alcohol	G6	4	No	28	60.2317
1588	Alcohol	G6	4	No	29	62.5621
1589	Alcohol	G6	4	No	30	70.799
1590	Alcohol	G6	4	No	31	69.5014
1591	Alcohol	G6	4	No	32	55.6358
1592	Alcohol	G6	4	No	33	10.0379
1593	Alcohol	G6	4	No	34	-0.824556
1594	Alcohol	G6	4	No	35	-4.37449
1595	Alcohol	G6	4	No	36	-3.96655
1596	Alcohol	G6	4	No	37	-4.33543
1597	Alcohol	G6	4	No	38	-4.19222
1598	Alcohol	G6	4	No	39	-7.02609
1599	Alcohol	G6	4	No	40	-5.11225
1600	Alcohol	G8	1	No	1	104.637
1601	Alcohol	G8	1	No	2	104.676
1602	Alcohol	G8	1	No	3	97.3433
1603	Alcohol	G8	1	No	4	95.8266
1604	Alcohol	G8	1	No	5	101.842
1605	Alcohol	G8	1	No	6	95.9423
1606	Alcohol	G8	1	No	7	85.1906
1607	Alcohol	G8	1	No	8	94.3099
1608	Alcohol	G8	1	No	9	111.16
1609	Alcohol	G8	1	No	10	109.072
1610	Alcohol	G8	1	No	11	309.883
1611	Alcohol	G8	1	No	12	168.845
1612	Alcohol	G8	1	No	13	112.214
1613	Alcohol	G8	1	No	14	85.5826
1614	Alcohol	G8	1	No	15	69.7476
1615	Alcohol	G8	1	No	16	74.3811
1616	Alcohol	G8	1	No	17	70.808
1617	Alcohol	G8	1	No	18	65.1397
1618	Alcohol	G8	1	No	19	79.9594
1619	Alcohol	G8	1	No	20	70.3067
1620	Alcohol	G8	1	No	21	75.9171
1621	Alcohol	G8	1	No	22	75.6664
1622	Alcohol	G8	1	No	23	66.5664
1623	Alcohol	G8	1	No	24	49.5296
1624	Alcohol	G8	1	No	25	53.122
1625	Alcohol	G8	1	No	26	51.7018
1626	Alcohol	G8	1	No	27	52.1902
1627	Alcohol	G8	1	No	28	62.4084
1628	Alcohol	G8	1	No	29	90.2355
1629	Alcohol	G8	1	No	30	89.4836
1630	Alcohol	G8	1	No	31	102.523
1631	Alcohol	G8	1	No	32	75.7757
1632	Alcohol	G8	1	No	33	14.4791
1633	Alcohol	G8	1	No	34	-13.5344
1634	Alcohol	G8	1	No	35	-23.3477
1635	Alcohol	G8	1	No	36	-24.3824
1636	Alcohol	G8	1	No	37	-25.9312
1637	Alcohol	G8	1	No	38	-23.6691
1638	Alcohol	G8	1	No	39	-25.3914
1639	Alcohol	G8	1	No	40	-29.8835
1640	Alcohol	G8	2	No	1	101.522
1641	Alcohol	G8	2	No	2	96.8582
1642	Alcohol	G8	2	No	3	98.3132
1643	Alcohol	G8	2	No	4	100.23
1644	Alcohol	G8	2	No	5	86.0954
1645	Alcohol	G8	2	No	6	96.6406
1646	Alcohol	G8	2	No	7	109.178
1647	Alcohol	G8	2	No	8	92.1805
1648	Alcohol	G8	2	No	9	97.3001
1649	Alcohol	G8	2	No	10	121.681
1650	Alcohol	G8	2	No	11	201.63
1651	Alcohol	G8	2	No	12	98.7347
1652	Alcohol	G8	2	No	13	59.4298
1653	Alcohol	G8	2	No	14	49.7549
1654	Alcohol	G8	2	No	15	42.8403
1655	Alcohol	G8	2	No	16	41.7185
1656	Alcohol	G8	2	No	17	49.1158
1657	Alcohol	G8	2	No	18	59.4774
1658	Alcohol	G8	2	No	19	55.1261
1659	Alcohol	G8	2	No	20	58.206
1660	Alcohol	G8	2	No	21	54.9629
1661	Alcohol	G8	2	No	22	48.9934
1662	Alcohol	G8	2	No	23	51.1691
1663	Alcohol	G8	2	No	24	53.0592
1664	Alcohol	G8	2	No	25	52.9164
1665	Alcohol	G8	2	No	26	61.5239
1666	Alcohol	G8	2	No	27	51.9374
1667	Alcohol	G8	2	No	28	50.7
1668	Alcohol	G8	2	No	29	55.4456
1669	Alcohol	G8	2	No	30	44.948
1670	Alcohol	G8	2	No	31	42.2556
1671	Alcohol	G8	2	No	32	51.5158
1672	Alcohol	G8	2	No	33	22.763
1673	Alcohol	G8	2	No	34	0.176773
1674	Alcohol	G8	2	No	35	0
1675	Alcohol	G8	2	No	36	0
1676	Alcohol	G8	2	No	37	0
1677	Alcohol	G8	2	No	38	0
1678	Alcohol	G8	2	No	39	0
1679	Alcohol	G8	2	No	40	0
1680	Alcohol	G8	3	No	1	99.666
1681	Alcohol	G8	3	No	2	96.0845
1682	Alcohol	G8	3	No	3	100.423
1683	Alcohol	G8	3	No	4	101.313
1684	Alcohol	G8	3	No	5	99.3576
1685	Alcohol	G8	3	No	6	100.43
1686	Alcohol	G8	3	No	7	98.8635
1687	Alcohol	G8	3	No	8	102.904
1688	Alcohol	G8	3	No	9	101.737
1689	Alcohol	G8	3	No	10	99.221
1690	Alcohol	G8	3	No	11	158.421
1691	Alcohol	G8	3	No	12	114.371
1692	Alcohol	G8	3	No	13	91.1993
1693	Alcohol	G8	3	No	14	87.8911
1694	Alcohol	G8	3	No	15	85.7324
1695	Alcohol	G8	3	No	16	86.8713
1696	Alcohol	G8	3	No	17	87.8456
1697	Alcohol	G8	3	No	18	89.1352
1698	Alcohol	G8	3	No	19	87.3585
1699	Alcohol	G8	3	No	20	89.5417
1700	Alcohol	G8	3	No	21	87.8806
1701	Alcohol	G8	3	No	22	89.2018
1702	Alcohol	G8	3	No	23	92.6291
1703	Alcohol	G8	3	No	24	91.7355
1704	Alcohol	G8	3	No	25	94.7423
1705	Alcohol	G8	3	No	26	94.8544
1706	Alcohol	G8	3	No	27	90.6456
1707	Alcohol	G8	3	No	28	87.4075
1708	Alcohol	G8	3	No	29	87.1973
1709	Alcohol	G8	3	No	30	83.5982
1710	Alcohol	G8	3	No	31	85.3785
1711	Alcohol	G8	3	No	32	81.0189
1712	Alcohol	G8	3	No	33	40.9353
1713	Alcohol	G8	3	No	34	13.9301
1714	Alcohol	G8	3	No	35	1.40177
1715	Alcohol	G8	3	No	36	0.301381
1716	Alcohol	G8	3	No	37	0.518656
1717	Alcohol	G8	3	No	38	1.31767
1718	Alcohol	G8	3	No	39	2.16223
1719	Alcohol	G8	3	No	40	0.203257
1760	Water	G1	1	No	1	105.012
1761	Water	G1	1	No	2	101.569
1762	Water	G1	1	No	3	101.795
1763	Water	G1	1	No	4	100.389
1764	Water	G1	1	No	5	102.316
1765	Water	G1	1	No	6	95.8531
1766	Water	G1	1	No	7	98.2637
1767	Water	G1	1	No	8	94.6549
1768	Water	G1	1	No	9	99.9376
1769	Water	G1	1	No	10	100.209
1770	Water	G1	1	No	11	159.732
1771	Water	G1	1	No	12	121.907
1772	Water	G1	1	No	13	107.18
1773	Water	G1	1	No	14	93.2594
1774	Water	G1	1	No	15	82.8878
1775	Water	G1	1	No	16	79.191
1776	Water	G1	1	No	17	79.4588
1777	Water	G1	1	No	18	87.6983
1778	Water	G1	1	No	19	83.138
1779	Water	G1	1	No	20	78.0562
1780	Water	G1	1	No	21	81.8094
1781	Water	G1	1	No	22	81.6544
1782	Water	G1	1	No	23	86.3943
1783	Water	G1	1	No	24	91.9695
1784	Water	G1	1	No	25	81.5275
1785	Water	G1	1	No	26	82.2323
1786	Water	G1	1	No	27	85.3124
1787	Water	G1	1	No	28	82.1478
1788	Water	G1	1	No	29	83.494
1789	Water	G1	1	No	30	87.0534
1790	Water	G1	1	No	31	84.3997
1791	Water	G1	1	No	32	49.2252
1792	Water	G1	1	No	33	-0.451091
1793	Water	G1	1	No	34	-7.9117
1794	Water	G1	1	No	35	-7.71787
1795	Water	G1	1	No	36	-7.06943
1796	Water	G1	1	No	37	-6.96018
1797	Water	G1	1	No	38	-8.61653
1798	Water	G1	1	No	39	-10.3575
1799	Water	G1	1	No	40	-6.38222
1800	Water	G1	2	No	1	99.2718
1801	Water	G1	2	No	2	98.9531
1802	Water	G1	2	No	3	91.6597
1803	Water	G1	2	No	4	94.8208
1804	Water	G1	2	No	5	102.954
1805	Water	G1	2	No	6	101.615
1806	Water	G1	2	No	7	103.097
1807	Water	G1	2	No	8	101.075
1808	Water	G1	2	No	9	100.284
1809	Water	G1	2	No	10	106.269
1810	Water	G1	2	No	11	222.93
1811	Water	G1	2	No	12	155.417
1812	Water	G1	2	No	13	104.021
1813	Water	G1	2	No	14	88.282
1814	Water	G1	2	No	15	68.8351
1815	Water	G1	2	No	16	71.5056
1816	Water	G1	2	No	17	65.6579
1817	Water	G1	2	No	18	65.2838
1818	Water	G1	2	No	19	70.8443
1819	Water	G1	2	No	20	75.3791
1820	Water	G1	2	No	21	83.3118
1821	Water	G1	2	No	22	86.0882
1822	Water	G1	2	No	23	79.0604
1823	Water	G1	2	No	24	85.6317
1824	Water	G1	2	No	25	96.464
1825	Water	G1	2	No	26	98.868
1826	Water	G1	2	No	27	90.41
1827	Water	G1	2	No	28	95.2475
1828	Water	G1	2	No	29	98.2935
1829	Water	G1	2	No	30	100.862
1830	Water	G1	2	No	31	100.752
1831	Water	G1	2	No	32	89.5766
1832	Water	G1	2	No	33	27.5555
1833	Water	G1	2	No	34	4.78163
1834	Water	G1	2	No	35	-1.82795
1835	Water	G1	2	No	36	-1.45895
1836	Water	G1	2	No	37	-1.48791
1837	Water	G1	2	No	38	-4.80241
1838	Water	G1	2	No	39	-3.36791
1839	Water	G1	2	No	40	-4.74307
1840	Water	G1	3	No	1	107.459
1841	Water	G1	3	No	2	101.171
1842	Water	G1	3	No	3	99.7166
1843	Water	G1	3	No	4	98.209
1844	Water	G1	3	No	5	96.0916
1845	Water	G1	3	No	6	96.9258
1846	Water	G1	3	No	7	99.3581
1847	Water	G1	3	No	8	100.554
1848	Water	G1	3	No	9	100.021
1849	Water	G1	3	No	10	100.494
1850	Water	G1	3	No	11	189.831
1851	Water	G1	3	No	12	134.02
1852	Water	G1	3	No	13	101.459
1853	Water	G1	3	No	14	87.0259
1854	Water	G1	3	No	15	77.3671
1855	Water	G1	3	No	16	71.8727
1856	Water	G1	3	No	17	72.0034
1857	Water	G1	3	No	18	71.3132
1858	Water	G1	3	No	19	67.9831
1859	Water	G1	3	No	20	67.1221
1860	Water	G1	3	No	21	67.045
1861	Water	G1	3	No	22	65.3599
1862	Water	G1	3	No	23	72.1575
1863	Water	G1	3	No	24	68.767
1864	Water	G1	3	No	25	68.1037
1865	Water	G1	3	No	26	66.4085
1866	Water	G1	3	No	27	63.7819
1867	Water	G1	3	No	28	73.0989
1868	Water	G1	3	No	29	69.1456
1869	Water	G1	3	No	30	63.3196
1870	Water	G1	3	No	31	68.0936
1871	Water	G1	3	No	32	69.5611
1872	Water	G1	3	No	33	57.8051
1873	Water	G1	3	No	34	18.6675
1874	Water	G1	3	No	35	6.35541
1875	Water	G1	3	No	36	2.22456
1876	Water	G1	3	No	37	2.00009
1877	Water	G1	3	No	38	4.2347
1878	Water	G1	3	No	39	0.0469034
1879	Water	G1	3	No	40	4.07724
