# Supplementary material for: The role of anterior insular cortex inputs to dorsolateral striatum in binge alcohol drinking
Source: eLife journal article supplement (doi:10.7554/elife.77411), 2022-07-28
Supplement: fig2-figsupp5-data1 [file Fig2S5B.xlsx]

## Sheet: Sheet1
	Fluid	PS Amplitude %
0	Water	126.68
1	Water	101.955
2	Water	85.8866
3	Water	95.1785
4	Water	86.6321
5	Water	91.1044
6	Water	81.6848
7	Water	88.8446
8	Alcohol	112.976
9	Alcohol	66.2788
10	Alcohol	87.3638
11	Alcohol	85.335
12	Alcohol	96.5616
13	Alcohol	106.726
14	Water	84.048
15	Water	96.7362
16	Water	67.1509
17	Alcohol	65.8783
18	Alcohol	117.536
19	Alcohol	72.8204
20	Alcohol	63.4917
21	Water	99.2333
22	Water	90.2554
23	Water	65.1535
24	Alcohol	69.2039
25	Alcohol	52.911
26	Alcohol	88.7406
