# Supplementary material for: The role of anterior insular cortex inputs to dorsolateral striatum in binge alcohol drinking
Source: eLife journal article supplement (doi:10.7554/elife.77411), 2022-07-28
Supplement: fig2-figsupp5-data1 [file Fig2S5C.xlsx]

## Sheet: Sheet1
	Fluid	Slices	Time min	Amplitude mV
8	Alcohol	F86-1	5.5	0.810181
9	Alcohol	F86-2	5.5	0.299011
10	Alcohol	F86-3	5.5	0.322174
11	Alcohol	F88-1	5.5	0.516083
12	Alcohol	F88-2	5.5	0.46756
13	Alcohol	F88-3	5.5	0.452789
17	Alcohol	G6-1	5.5	0.32774
18	Alcohol	G6-2	5.5	0.445986
19	Alcohol	G6-3	5.5	0.71994
20	Alcohol	G6-4	5.5	0.468805
24	Alcohol	G8-1	5.5	0.316577
25	Alcohol	G8-2	5.5	0.299237
26	Alcohol	G8-3	5.5	0.580552
8	Alcohol	F86-1	28	0.915314
9	Alcohol	F86-2	28	0.198181
10	Alcohol	F86-3	28	0.281464
11	Alcohol	F88-1	28	0.440399
12	Alcohol	F88-2	28	0.451483
13	Alcohol	F88-3	28	0.483246
17	Alcohol	G6-1	28	0.21591
18	Alcohol	G6-2	28	0.524194
19	Alcohol	G6-3	28	0.524264
20	Alcohol	G6-4	28	0.297652
24	Alcohol	G8-1	28	0.219084
25	Alcohol	G8-2	28	0.158329
26	Alcohol	G8-3	28	0.515186
