# Supplementary material for: The role of anterior insular cortex inputs to dorsolateral striatum in binge alcohol drinking
Source: eLife journal article supplement (doi:10.7554/elife.77411), 2022-07-28
Supplement: fig2-figsupp5-data1 [file Fig2S5D.xlsx]

## Sheet: Sheet1
	Fluid	Slices	Time min	Amplitude mV
0	Water	F82-1	5.5	0.468479
1	Water	F82-2	5.5	0.519836
2	Water	F84-1	5.5	0.273315
3	Water	F84-2	5.5	0.443726
4	Water	F84-3	5.5	0.611816
5	Water	F85-1	5.5	0.519547
6	Water	F85-2	5.5	0.393066
7	Water	F85-3	5.5	0.344696
14	Water	G1-1	5.5	0.577305
15	Water	G1-2	5.5	0.542566
16	Water	G1-3	5.5	0.607271
21	Water	G7-1	5.5	0.540446
22	Water	G7-2	5.5	0.288664
23	Water	G7-3	5.5	0.40801
0	Water	F82-1	28	0.561279
1	Water	F82-2	28	0.529999
2	Water	F84-1	28	0.234741
3	Water	F84-2	28	0.422332
4	Water	F84-3	28	0.530029
5	Water	F85-1	28	0.47333
6	Water	F85-2	28	0.321075
7	Water	F85-3	28	0.306244
14	Water	G1-1	28	0.485213
15	Water	G1-2	28	0.524858
16	Water	G1-3	28	0.407788
21	Water	G7-1	28	0.536303
22	Water	G7-2	28	0.260535
23	Water	G7-3	28	0.265833
