# Supplementary material for: The role of anterior insular cortex inputs to dorsolateral striatum in binge alcohol drinking
Source: eLife journal article supplement (doi:10.7554/elife.77411), 2022-07-28
Supplement: fig2-figsupp5-data1 [file Fig2S5E.xlsx]

## Sheet: Sheet1
	Fluid	Animal	Slice	Picrotoxin	Time min	PS Amplitude %
560	Water	F80	1	Yes	1	99.4583
561	Water	F80	1	Yes	2	101.024
562	Water	F80	1	Yes	3	99.6454
563	Water	F80	1	Yes	4	90.484
564	Water	F80	1	Yes	5	102.154
565	Water	F80	1	Yes	6	105.796
566	Water	F80	1	Yes	7	101.901
567	Water	F80	1	Yes	8	99.3043
568	Water	F80	1	Yes	9	100.911
569	Water	F80	1	Yes	10	99.3226
570	Water	F80	1	Yes	11	169.39
571	Water	F80	1	Yes	12	120.785
572	Water	F80	1	Yes	13	102.983
573	Water	F80	1	Yes	14	91.885
574	Water	F80	1	Yes	15	89.5598
575	Water	F80	1	Yes	16	89.7835
576	Water	F80	1	Yes	17	89.3581
577	Water	F80	1	Yes	18	91.3202
578	Water	F80	1	Yes	19	95.8238
579	Water	F80	1	Yes	20	100.034
580	Water	F80	1	Yes	21	95.5158
581	Water	F80	1	Yes	22	97.8446
582	Water	F80	1	Yes	23	96.8507
583	Water	F80	1	Yes	24	104.838
584	Water	F80	1	Yes	25	98.1857
585	Water	F80	1	Yes	26	106.885
586	Water	F80	1	Yes	27	101.688
587	Water	F80	1	Yes	28	111.161
588	Water	F80	1	Yes	29	104.182
589	Water	F80	1	Yes	30	103.159
590	Water	F80	1	Yes	31	102.656
591	Water	F80	1	Yes	32	108.117
592	Water	F80	1	Yes	33	112.522
593	Water	F80	1	Yes	34	100.716
594	Water	F80	1	Yes	35	99.1833
595	Water	F80	1	Yes	36	107.659
596	Water	F80	1	Yes	37	100.738
597	Water	F80	1	Yes	38	106.394
598	Water	F80	1	Yes	39	108.202
599	Water	F80	1	Yes	40	112.581
600	Water	F80	2	Yes	1	103.989
601	Water	F80	2	Yes	2	101.324
602	Water	F80	2	Yes	3	100.066
603	Water	F80	2	Yes	4	94.0621
604	Water	F80	2	Yes	5	96.9307
605	Water	F80	2	Yes	6	102.33
606	Water	F80	2	Yes	7	99.8289
607	Water	F80	2	Yes	8	101.157
608	Water	F80	2	Yes	9	98.6414
609	Water	F80	2	Yes	10	101.67
610	Water	F80	2	Yes	11	126.529
611	Water	F80	2	Yes	12	99.7658
612	Water	F80	2	Yes	13	86.629
613	Water	F80	2	Yes	14	82.3317
615	Water	F80	2	Yes	16	107.099
616	Water	F80	2	Yes	17	105.889
617	Water	F80	2	Yes	18	104.148
618	Water	F80	2	Yes	19	112.483
619	Water	F80	2	Yes	20	111.641
620	Water	F80	2	Yes	21	112.353
621	Water	F80	2	Yes	22	112.847
622	Water	F80	2	Yes	23	114.992
623	Water	F80	2	Yes	24	114.242
624	Water	F80	2	Yes	25	121.074
625	Water	F80	2	Yes	26	119.378
626	Water	F80	2	Yes	27	129.895
627	Water	F80	2	Yes	28	123.305
628	Water	F80	2	Yes	29	120.911
629	Water	F80	2	Yes	30	125.887
630	Water	F80	2	Yes	31	125.691
631	Water	F80	2	Yes	32	127.312
632	Water	F80	2	Yes	33	125.698
633	Water	F80	2	Yes	34	123.052
634	Water	F80	2	Yes	35	125.138
635	Water	F80	2	Yes	36	117.148
636	Water	F80	2	Yes	37	124.128
637	Water	F80	2	Yes	38	122.982
638	Water	F80	2	Yes	39	123.601
639	Water	F80	2	Yes	40	125.438
640	Water	F80	3	Yes	1	83.763
641	Water	F80	3	Yes	2	102.4
642	Water	F80	3	Yes	3	100.044
643	Water	F80	3	Yes	4	104.439
644	Water	F80	3	Yes	5	97.6124
645	Water	F80	3	Yes	6	100.768
646	Water	F80	3	Yes	7	104.807
647	Water	F80	3	Yes	8	108.807
648	Water	F80	3	Yes	9	103.747
649	Water	F80	3	Yes	10	93.6119
650	Water	F80	3	Yes	11	161.386
651	Water	F80	3	Yes	12	117.082
652	Water	F80	3	Yes	13	115.056
653	Water	F80	3	Yes	14	93.8024
654	Water	F80	3	Yes	15	88.2588
655	Water	F80	3	Yes	16	94.7866
656	Water	F80	3	Yes	17	85.5156
657	Water	F80	3	Yes	18	98.7681
658	Water	F80	3	Yes	19	93.4912
659	Water	F80	3	Yes	20	101.353
660	Water	F80	3	Yes	21	112.668
661	Water	F80	3	Yes	22	104.312
662	Water	F80	3	Yes	23	99.7904
663	Water	F80	3	Yes	24	101.365
664	Water	F80	3	Yes	25	94.1834
665	Water	F80	3	Yes	26	86.2395
666	Water	F80	3	Yes	27	92.4308
667	Water	F80	3	Yes	28	107.239
668	Water	F80	3	Yes	29	91.7958
669	Water	F80	3	Yes	30	102.337
670	Water	F80	3	Yes	31	108.617
671	Water	F80	3	Yes	32	99.473
672	Water	F80	3	Yes	33	98.6982
673	Water	F80	3	Yes	34	120.345
674	Water	F80	3	Yes	35	118.612
675	Water	F80	3	Yes	36	97.6568
676	Water	F80	3	Yes	37	96.8694
677	Water	F80	3	Yes	38	101.016
678	Water	F80	3	Yes	39	105.302
679	Water	F80	3	Yes	40	101.842
680	Water	F73	1	Yes	1	98.4068
681	Water	F73	1	Yes	2	97.9408
682	Water	F73	1	Yes	3	103.053
683	Water	F73	1	Yes	4	98.2638
684	Water	F73	1	Yes	5	105.406
685	Water	F73	1	Yes	6	101.004
686	Water	F73	1	Yes	7	99.3157
687	Water	F73	1	Yes	8	100.838
688	Water	F73	1	Yes	9	100.866
689	Water	F73	1	Yes	10	94.9048
690	Water	F73	1	Yes	11	146.443
691	Water	F73	1	Yes	12	89.6356
692	Water	F73	1	Yes	13	84.6941
693	Water	F73	1	Yes	14	82.8023
694	Water	F73	1	Yes	15	86.6412
695	Water	F73	1	Yes	16	82.9777
696	Water	F73	1	Yes	17	91.472
697	Water	F73	1	Yes	18	93.8021
698	Water	F73	1	Yes	19	86.7519
699	Water	F73	1	Yes	20	91.9149
700	Water	F73	1	Yes	21	90.6046
701	Water	F73	1	Yes	22	94.7894
702	Water	F73	1	Yes	23	94.6787
703	Water	F73	1	Yes	24	91.8826
704	Water	F73	1	Yes	25	97.364
705	Water	F73	1	Yes	26	100.534
706	Water	F73	1	Yes	27	105.738
707	Water	F73	1	Yes	28	102.762
708	Water	F73	1	Yes	29	103.251
709	Water	F73	1	Yes	30	104.377
710	Water	F73	1	Yes	31	105.748
711	Water	F73	1	Yes	32	108.115
712	Water	F73	1	Yes	33	106.08
713	Water	F73	1	Yes	34	104.17
714	Water	F73	1	Yes	35	103.967
715	Water	F73	1	Yes	36	101.041
716	Water	F73	1	Yes	37	103.676
717	Water	F73	1	Yes	38	106.984
718	Water	F73	1	Yes	39	106.846
719	Water	F73	1	Yes	40	104.889
720	Water	F73	2	Yes	1	93.8172
721	Water	F73	2	Yes	2	100.488
722	Water	F73	2	Yes	3	100.374
723	Water	F73	2	Yes	4	100.573
724	Water	F73	2	Yes	5	99.2994
725	Water	F73	2	Yes	6	100.795
726	Water	F73	2	Yes	7	105.072
727	Water	F73	2	Yes	8	100.846
728	Water	F73	2	Yes	9	113.949
729	Water	F73	2	Yes	10	84.7863
730	Water	F73	2	Yes	11	177.915
731	Water	F73	2	Yes	12	117.242
732	Water	F73	2	Yes	13	100.806
733	Water	F73	2	Yes	14	96.7232
734	Water	F73	2	Yes	15	100.187
735	Water	F73	2	Yes	16	100.943
736	Water	F73	2	Yes	17	103.11
737	Water	F73	2	Yes	18	111.538
738	Water	F73	2	Yes	19	113.795
739	Water	F73	2	Yes	20	114.711
740	Water	F73	2	Yes	21	117.145
741	Water	F73	2	Yes	22	120.091
742	Water	F73	2	Yes	23	113.881
743	Water	F73	2	Yes	24	114.609
744	Water	F73	2	Yes	25	121.353
745	Water	F73	2	Yes	26	116.491
746	Water	F73	2	Yes	27	119.118
747	Water	F73	2	Yes	28	120.722
748	Water	F73	2	Yes	29	124.237
749	Water	F73	2	Yes	30	118.806
750	Water	F73	2	Yes	31	122.849
751	Water	F73	2	Yes	32	124.015
752	Water	F73	2	Yes	33	119.653
753	Water	F73	2	Yes	34	121.569
754	Water	F73	2	Yes	35	131.061
755	Water	F73	2	Yes	36	127.774
756	Water	F73	2	Yes	37	136.128
757	Water	F73	2	Yes	38	122.036
758	Water	F73	2	Yes	39	132.966
759	Water	F73	2	Yes	40	128.2
760	Water	F73	3	Yes	1	99.7778
761	Water	F73	3	Yes	2	110.601
762	Water	F73	3	Yes	3	98.7465
763	Water	F73	3	Yes	4	95.2522
764	Water	F73	3	Yes	5	104.079
765	Water	F73	3	Yes	6	92.6356
766	Water	F73	3	Yes	7	102.301
767	Water	F73	3	Yes	8	97.9676
768	Water	F73	3	Yes	9	95.8117
769	Water	F73	3	Yes	10	102.828
770	Water	F73	3	Yes	11	131.715
771	Water	F73	3	Yes	12	105.505
772	Water	F73	3	Yes	13	95.0876
773	Water	F73	3	Yes	14	87.9179
774	Water	F73	3	Yes	15	89.2235
775	Water	F73	3	Yes	16	81.8618
776	Water	F73	3	Yes	17	88.6256
777	Water	F73	3	Yes	18	102.877
778	Water	F73	3	Yes	19	99.3993
779	Water	F73	3	Yes	20	104.43
780	Water	F73	3	Yes	21	112.461
781	Water	F73	3	Yes	22	103.881
782	Water	F73	3	Yes	23	100.54
783	Water	F73	3	Yes	24	111.314
784	Water	F73	3	Yes	25	105.834
785	Water	F73	3	Yes	26	97.2215
786	Water	F73	3	Yes	27	111.638
787	Water	F73	3	Yes	28	104.792
788	Water	F73	3	Yes	29	105.444
789	Water	F73	3	Yes	30	109.498
790	Water	F73	3	Yes	31	108.73
791	Water	F73	3	Yes	32	113.766
792	Water	F73	3	Yes	33	117.332
793	Water	F73	3	Yes	34	112.806
794	Water	F73	3	Yes	35	112.642
795	Water	F73	3	Yes	36	109.235
796	Water	F73	3	Yes	37	112.109
797	Water	F73	3	Yes	38	116.344
798	Water	F73	3	Yes	39	114.989
799	Water	F73	3	Yes	40	114.161
800	Alcohol	F72	1	Yes	1	98.271
801	Alcohol	F72	1	Yes	2	94.2423
802	Alcohol	F72	1	Yes	3	91.1681
803	Alcohol	F72	1	Yes	4	97.8921
804	Alcohol	F72	1	Yes	5	93.9882
805	Alcohol	F72	1	Yes	6	110.026
806	Alcohol	F72	1	Yes	7	115.585
807	Alcohol	F72	1	Yes	8	89.5422
808	Alcohol	F72	1	Yes	9	105.12
809	Alcohol	F72	1	Yes	10	104.165
810	Alcohol	F72	1	Yes	11	191.468
811	Alcohol	F72	1	Yes	12	147.827
812	Alcohol	F72	1	Yes	13	102.375
813	Alcohol	F72	1	Yes	14	92.7574
814	Alcohol	F72	1	Yes	15	90.3456
815	Alcohol	F72	1	Yes	16	94.7802
816	Alcohol	F72	1	Yes	17	86.043
817	Alcohol	F72	1	Yes	18	92.1435
818	Alcohol	F72	1	Yes	19	89.778
819	Alcohol	F72	1	Yes	20	95.3446
820	Alcohol	F72	1	Yes	21	100.078
821	Alcohol	F72	1	Yes	22	94.4947
822	Alcohol	F72	1	Yes	23	106.838
823	Alcohol	F72	1	Yes	24	108.421
824	Alcohol	F72	1	Yes	25	101.456
825	Alcohol	F72	1	Yes	26	107.363
826	Alcohol	F72	1	Yes	27	103.56
827	Alcohol	F72	1	Yes	28	116.465
828	Alcohol	F72	1	Yes	29	115.393
829	Alcohol	F72	1	Yes	30	122.062
830	Alcohol	F72	1	Yes	31	112.215
831	Alcohol	F72	1	Yes	32	115.365
832	Alcohol	F72	1	Yes	33	114.614
833	Alcohol	F72	1	Yes	34	108.526
834	Alcohol	F72	1	Yes	35	105.029
835	Alcohol	F72	1	Yes	36	106.283
836	Alcohol	F72	1	Yes	37	108.861
837	Alcohol	F72	1	Yes	38	114.844
838	Alcohol	F72	1	Yes	39	109.552
839	Alcohol	F72	1	Yes	40	107.473
840	Alcohol	F72	2	Yes	1	95.5779
841	Alcohol	F72	2	Yes	2	105.131
842	Alcohol	F72	2	Yes	3	100.612
843	Alcohol	F72	2	Yes	4	110.924
845	Alcohol	F72	2	Yes	6	106.859
846	Alcohol	F72	2	Yes	7	105.946
847	Alcohol	F72	2	Yes	8	108.4
848	Alcohol	F72	2	Yes	9	107.374
849	Alcohol	F72	2	Yes	10	105.538
850	Alcohol	F72	2	Yes	11	158.825
851	Alcohol	F72	2	Yes	12	114.525
852	Alcohol	F72	2	Yes	13	93.85
853	Alcohol	F72	2	Yes	14	85.0086
854	Alcohol	F72	2	Yes	15	90.2207
855	Alcohol	F72	2	Yes	16	92.7776
856	Alcohol	F72	2	Yes	17	92.3046
857	Alcohol	F72	2	Yes	18	95.1003
858	Alcohol	F72	2	Yes	19	100.799
859	Alcohol	F72	2	Yes	20	99.3617
860	Alcohol	F72	2	Yes	21	100.598
861	Alcohol	F72	2	Yes	22	105.084
862	Alcohol	F72	2	Yes	23	105.08
863	Alcohol	F72	2	Yes	24	103.82
864	Alcohol	F72	2	Yes	25	107.43
865	Alcohol	F72	2	Yes	26	105.22
866	Alcohol	F72	2	Yes	27	105.848
867	Alcohol	F72	2	Yes	28	116.183
868	Alcohol	F72	2	Yes	29	111.12
869	Alcohol	F72	2	Yes	30	116.979
870	Alcohol	F72	2	Yes	31	114.38
871	Alcohol	F72	2	Yes	32	118.941
872	Alcohol	F72	2	Yes	33	120.608
873	Alcohol	F72	2	Yes	34	118.538
874	Alcohol	F72	2	Yes	35	122.996
875	Alcohol	F72	2	Yes	36	124.34
876	Alcohol	F72	2	Yes	37	120.29
877	Alcohol	F72	2	Yes	38	124.94
878	Alcohol	F72	2	Yes	39	120.051
879	Alcohol	F72	2	Yes	40	122.088
880	Alcohol	F72	3	Yes	1	87.1856
881	Alcohol	F72	3	Yes	2	92.4613
882	Alcohol	F72	3	Yes	3	94.7078
883	Alcohol	F72	3	Yes	4	96.4769
884	Alcohol	F72	3	Yes	5	105.399
885	Alcohol	F72	3	Yes	6	107.327
886	Alcohol	F72	3	Yes	7	103.051
887	Alcohol	F72	3	Yes	8	106.602
888	Alcohol	F72	3	Yes	9	98.7998
889	Alcohol	F72	3	Yes	10	107.989
890	Alcohol	F72	3	Yes	11	225.147
891	Alcohol	F72	3	Yes	12	149.774
892	Alcohol	F72	3	Yes	13	117.119
893	Alcohol	F72	3	Yes	14	117.112
894	Alcohol	F72	3	Yes	15	107.695
895	Alcohol	F72	3	Yes	16	103.213
896	Alcohol	F72	3	Yes	17	105.32
897	Alcohol	F72	3	Yes	18	109.404
898	Alcohol	F72	3	Yes	19	102.068
899	Alcohol	F72	3	Yes	20	115.353
900	Alcohol	F72	3	Yes	21	118.023
901	Alcohol	F72	3	Yes	22	110.194
902	Alcohol	F72	3	Yes	23	113.571
903	Alcohol	F72	3	Yes	24	124.051
904	Alcohol	F72	3	Yes	25	125.2
905	Alcohol	F72	3	Yes	26	126.037
906	Alcohol	F72	3	Yes	27	129.191
907	Alcohol	F72	3	Yes	28	131.937
908	Alcohol	F72	3	Yes	29	134.195
909	Alcohol	F72	3	Yes	30	124.656
910	Alcohol	F72	3	Yes	31	126.657
911	Alcohol	F72	3	Yes	32	131.495
912	Alcohol	F72	3	Yes	33	137.11
913	Alcohol	F72	3	Yes	34	140.172
914	Alcohol	F72	3	Yes	35	135.358
915	Alcohol	F72	3	Yes	36	132.069
916	Alcohol	F72	3	Yes	37	132.634
917	Alcohol	F72	3	Yes	38	143.89
918	Alcohol	F72	3	Yes	39	135.582
919	Alcohol	F72	3	Yes	40	137.076
920	Alcohol	F72	4	Yes	1	86.2307
921	Alcohol	F72	4	Yes	2	95.0941
922	Alcohol	F72	4	Yes	3	90.7281
923	Alcohol	F72	4	Yes	4	93.5308
924	Alcohol	F72	4	Yes	5	111.845
925	Alcohol	F72	4	Yes	6	101.145
926	Alcohol	F72	4	Yes	7	105.554
927	Alcohol	F72	4	Yes	8	98.9202
928	Alcohol	F72	4	Yes	9	105.573
929	Alcohol	F72	4	Yes	10	111.38
930	Alcohol	F72	4	Yes	11	163.56
931	Alcohol	F72	4	Yes	12	121.168
932	Alcohol	F72	4	Yes	13	93.8688
933	Alcohol	F72	4	Yes	14	92.9158
934	Alcohol	F72	4	Yes	15	99.9906
935	Alcohol	F72	4	Yes	16	99.1456
936	Alcohol	F72	4	Yes	17	113.934
937	Alcohol	F72	4	Yes	18	103.357
938	Alcohol	F72	4	Yes	19	99.8639
939	Alcohol	F72	4	Yes	20	104.666
940	Alcohol	F72	4	Yes	21	106.788
941	Alcohol	F72	4	Yes	22	107.187
942	Alcohol	F72	4	Yes	23	105.849
943	Alcohol	F72	4	Yes	24	112.525
944	Alcohol	F72	4	Yes	25	116.774
945	Alcohol	F72	4	Yes	26	112.849
946	Alcohol	F72	4	Yes	27	117.44
947	Alcohol	F72	4	Yes	28	121.004
948	Alcohol	F72	4	Yes	29	120.971
949	Alcohol	F72	4	Yes	30	119.051
950	Alcohol	F72	4	Yes	31	120.483
951	Alcohol	F72	4	Yes	32	117.811
952	Alcohol	F72	4	Yes	33	127.191
953	Alcohol	F72	4	Yes	34	120.774
954	Alcohol	F72	4	Yes	35	125.097
955	Alcohol	F72	4	Yes	36	126.074
956	Alcohol	F72	4	Yes	37	127.022
957	Alcohol	F72	4	Yes	38	135.28
958	Alcohol	F72	4	Yes	39	138.411
959	Alcohol	F72	4	Yes	40	131.787
960	Alcohol	F78	1	Yes	1	92.6262
961	Alcohol	F78	1	Yes	2	105.271
962	Alcohol	F78	1	Yes	3	96.1447
963	Alcohol	F78	1	Yes	4	95.441
964	Alcohol	F78	1	Yes	5	106.551
965	Alcohol	F78	1	Yes	6	95.2661
966	Alcohol	F78	1	Yes	7	100.243
967	Alcohol	F78	1	Yes	8	92.0846
968	Alcohol	F78	1	Yes	9	109.724
969	Alcohol	F78	1	Yes	10	106.649
970	Alcohol	F78	1	Yes	11	217.618
971	Alcohol	F78	1	Yes	12	132.485
972	Alcohol	F78	1	Yes	13	103.599
973	Alcohol	F78	1	Yes	14	92.3106
974	Alcohol	F78	1	Yes	15	91.1634
975	Alcohol	F78	1	Yes	16	80.2414
976	Alcohol	F78	1	Yes	17	84.3953
977	Alcohol	F78	1	Yes	18	97.0189
978	Alcohol	F78	1	Yes	19	102.584
979	Alcohol	F78	1	Yes	20	102.111
980	Alcohol	F78	1	Yes	21	104.184
981	Alcohol	F78	1	Yes	22	101.224
982	Alcohol	F78	1	Yes	23	101.356
983	Alcohol	F78	1	Yes	24	99.066
984	Alcohol	F78	1	Yes	25	105.958
985	Alcohol	F78	1	Yes	26	106.32
986	Alcohol	F78	1	Yes	27	109.007
987	Alcohol	F78	1	Yes	28	106.512
988	Alcohol	F78	1	Yes	29	119.631
989	Alcohol	F78	1	Yes	30	112.129
990	Alcohol	F78	1	Yes	31	108.286
991	Alcohol	F78	1	Yes	32	106.883
992	Alcohol	F78	1	Yes	33	110.977
993	Alcohol	F78	1	Yes	34	108.862
994	Alcohol	F78	1	Yes	35	115.494
995	Alcohol	F78	1	Yes	36	121.017
996	Alcohol	F78	1	Yes	37	112.317
997	Alcohol	F78	1	Yes	38	111.903
998	Alcohol	F78	1	Yes	39	112.031
999	Alcohol	F78	1	Yes	40	116.47
1000	Alcohol	F78	2	Yes	1	93.4277
1001	Alcohol	F78	2	Yes	2	97.5405
1002	Alcohol	F78	2	Yes	3	96.2886
1003	Alcohol	F78	2	Yes	4	103.823
1004	Alcohol	F78	2	Yes	5	102.096
1005	Alcohol	F78	2	Yes	6	99.5471
1006	Alcohol	F78	2	Yes	7	101.197
1007	Alcohol	F78	2	Yes	8	102.593
1008	Alcohol	F78	2	Yes	9	100.889
1009	Alcohol	F78	2	Yes	10	102.598
1010	Alcohol	F78	2	Yes	11	120.983
1011	Alcohol	F78	2	Yes	12	99.9539
1012	Alcohol	F78	2	Yes	13	88.1625
1013	Alcohol	F78	2	Yes	14	80.0815
1014	Alcohol	F78	2	Yes	15	80.6194
1015	Alcohol	F78	2	Yes	16	83.8553
1016	Alcohol	F78	2	Yes	17	85.5908
1017	Alcohol	F78	2	Yes	18	87.8913
1018	Alcohol	F78	2	Yes	19	87.1953
1019	Alcohol	F78	2	Yes	20	92.0718
1020	Alcohol	F78	2	Yes	21	93.6718
1021	Alcohol	F78	2	Yes	22	100.46
1022	Alcohol	F78	2	Yes	23	93.4503
1023	Alcohol	F78	2	Yes	24	93.3599
1024	Alcohol	F78	2	Yes	25	101.079
1025	Alcohol	F78	2	Yes	26	105.662
1026	Alcohol	F78	2	Yes	27	99.0455
1027	Alcohol	F78	2	Yes	28	107.384
1028	Alcohol	F78	2	Yes	29	102.01
1029	Alcohol	F78	2	Yes	30	97.6851
1030	Alcohol	F78	2	Yes	31	100.763
1031	Alcohol	F78	2	Yes	32	95.9722
1032	Alcohol	F78	2	Yes	33	102.973
1033	Alcohol	F78	2	Yes	34	106.697
1034	Alcohol	F78	2	Yes	35	111.144
1035	Alcohol	F78	2	Yes	36	102.616
1036	Alcohol	F78	2	Yes	37	107.727
1037	Alcohol	F78	2	Yes	38	110.019
1038	Alcohol	F78	2	Yes	39	110.697
1039	Alcohol	F78	2	Yes	40	113.879
1040	Alcohol	F78	3	Yes	1	97.2097
1041	Alcohol	F78	3	Yes	2	92.6871
1042	Alcohol	F78	3	Yes	3	98.1707
1043	Alcohol	F78	3	Yes	4	105.012
1044	Alcohol	F78	3	Yes	5	100.414
1045	Alcohol	F78	3	Yes	6	94.2564
1046	Alcohol	F78	3	Yes	7	102.23
1047	Alcohol	F78	3	Yes	8	97.3728
1048	Alcohol	F78	3	Yes	9	105.052
1049	Alcohol	F78	3	Yes	10	107.595
1050	Alcohol	F78	3	Yes	11	123.781
1051	Alcohol	F78	3	Yes	12	117.879
1052	Alcohol	F78	3	Yes	13	103.037
1053	Alcohol	F78	3	Yes	14	103.778
1054	Alcohol	F78	3	Yes	15	99.2022
1055	Alcohol	F78	3	Yes	16	95.2746
1056	Alcohol	F78	3	Yes	17	101.741
1057	Alcohol	F78	3	Yes	18	97.5844
1058	Alcohol	F78	3	Yes	19	108.6
1059	Alcohol	F78	3	Yes	20	105.069
1060	Alcohol	F78	3	Yes	21	116.424
1061	Alcohol	F78	3	Yes	22	117.654
1062	Alcohol	F78	3	Yes	23	112.814
1063	Alcohol	F78	3	Yes	24	115.067
1064	Alcohol	F78	3	Yes	25	120.431
1065	Alcohol	F78	3	Yes	26	119.563
1066	Alcohol	F78	3	Yes	27	113.828
1067	Alcohol	F78	3	Yes	28	118.712
1068	Alcohol	F78	3	Yes	29	117.822
1069	Alcohol	F78	3	Yes	30	116.38
1070	Alcohol	F78	3	Yes	31	114.714
1071	Alcohol	F78	3	Yes	32	119.761
1072	Alcohol	F78	3	Yes	33	123.279
1073	Alcohol	F78	3	Yes	34	124.306
1074	Alcohol	F78	3	Yes	35	121.405
1075	Alcohol	F78	3	Yes	36	119.25
1076	Alcohol	F78	3	Yes	37	123.548
1077	Alcohol	F78	3	Yes	38	116.993
1078	Alcohol	F78	3	Yes	39	116.596
1079	Alcohol	F78	3	Yes	40	120.515
1080	Alcohol	F75	1	Yes	1	91.7633
1081	Alcohol	F75	1	Yes	2	94.8226
1082	Alcohol	F75	1	Yes	3	99.6956
1083	Alcohol	F75	1	Yes	4	104.616
1084	Alcohol	F75	1	Yes	5	99.9458
1085	Alcohol	F75	1	Yes	6	105.976
1086	Alcohol	F75	1	Yes	7	94.3379
1087	Alcohol	F75	1	Yes	8	109.03
1088	Alcohol	F75	1	Yes	9	101.171
1089	Alcohol	F75	1	Yes	10	98.6429
1090	Alcohol	F75	1	Yes	11	166.067
1091	Alcohol	F75	1	Yes	12	114.982
1092	Alcohol	F75	1	Yes	13	97.5901
1093	Alcohol	F75	1	Yes	14	94.1138
1094	Alcohol	F75	1	Yes	15	80.5789
1095	Alcohol	F75	1	Yes	16	81.861
1096	Alcohol	F75	1	Yes	17	86.1816
1097	Alcohol	F75	1	Yes	18	90.0799
1098	Alcohol	F75	1	Yes	19	83.9822
1099	Alcohol	F75	1	Yes	20	86.8904
1100	Alcohol	F75	1	Yes	21	86.7027
1101	Alcohol	F75	1	Yes	22	85.0245
1102	Alcohol	F75	1	Yes	23	82.4135
1103	Alcohol	F75	1	Yes	24	87.005
1104	Alcohol	F75	1	Yes	25	83.1587
1105	Alcohol	F75	1	Yes	26	86.4421
1106	Alcohol	F75	1	Yes	27	88.1047
1107	Alcohol	F75	1	Yes	28	78.8434
1108	Alcohol	F75	1	Yes	29	83.4193
1109	Alcohol	F75	1	Yes	30	89.6005
1110	Alcohol	F75	1	Yes	31	83.2317
1111	Alcohol	F75	1	Yes	32	81.3294
1112	Alcohol	F75	1	Yes	33	85.5405
1113	Alcohol	F75	1	Yes	34	84.1281
1114	Alcohol	F75	1	Yes	35	84.4669
1115	Alcohol	F75	1	Yes	36	87.7242
1116	Alcohol	F75	1	Yes	37	80.0004
1117	Alcohol	F75	1	Yes	38	85.9887
1118	Alcohol	F75	1	Yes	39	74.7626
1119	Alcohol	F75	1	Yes	40	82.1841
1120	Alcohol	F75	2	Yes	1	96.9237
1121	Alcohol	F75	2	Yes	2	101.935
1122	Alcohol	F75	2	Yes	3	107.983
1123	Alcohol	F75	2	Yes	4	101.501
1124	Alcohol	F75	2	Yes	5	93.7255
1125	Alcohol	F75	2	Yes	6	98.005
1126	Alcohol	F75	2	Yes	7	98.9605
1127	Alcohol	F75	2	Yes	8	97.4043
1128	Alcohol	F75	2	Yes	9	102.88
1129	Alcohol	F75	2	Yes	10	100.683
1130	Alcohol	F75	2	Yes	11	143.272
1131	Alcohol	F75	2	Yes	12	101.26
1132	Alcohol	F75	2	Yes	13	77.2769
1133	Alcohol	F75	2	Yes	14	67.0073
1134	Alcohol	F75	2	Yes	15	73.9529
1135	Alcohol	F75	2	Yes	16	68.7809
1136	Alcohol	F75	2	Yes	17	77.4428
1137	Alcohol	F75	2	Yes	18	75.9839
1138	Alcohol	F75	2	Yes	19	86.3851
1139	Alcohol	F75	2	Yes	20	73.2549
1140	Alcohol	F75	2	Yes	21	79.6169
1141	Alcohol	F75	2	Yes	22	77.1339
1142	Alcohol	F75	2	Yes	23	84.4056
1143	Alcohol	F75	2	Yes	24	84.3655
1144	Alcohol	F75	2	Yes	25	81.0301
1145	Alcohol	F75	2	Yes	26	79.3423
1146	Alcohol	F75	2	Yes	27	91.8947
1147	Alcohol	F75	2	Yes	28	87.4665
1148	Alcohol	F75	2	Yes	29	90.739
1149	Alcohol	F75	2	Yes	30	85.5212
1150	Alcohol	F75	2	Yes	31	95.9797
1151	Alcohol	F75	2	Yes	32	92.1922
1152	Alcohol	F75	2	Yes	33	88.1816
1153	Alcohol	F75	2	Yes	34	94.7782
1154	Alcohol	F75	2	Yes	35	92.3352
1155	Alcohol	F75	2	Yes	36	97.5073
1156	Alcohol	F75	2	Yes	37	86.6655
1157	Alcohol	F75	2	Yes	38	90.2069
1158	Alcohol	F75	2	Yes	39	93.983
1159	Alcohol	F75	2	Yes	40	97.3757
1160	Alcohol	F75	3	Yes	1	105.73
1161	Alcohol	F75	3	Yes	2	103.377
1162	Alcohol	F75	3	Yes	3	102.045
1163	Alcohol	F75	3	Yes	4	96.0511
1164	Alcohol	F75	3	Yes	5	99.0693
1165	Alcohol	F75	3	Yes	6	97.4927
1166	Alcohol	F75	3	Yes	7	98.7657
1167	Alcohol	F75	3	Yes	8	103.006
1168	Alcohol	F75	3	Yes	9	96.6665
1169	Alcohol	F75	3	Yes	10	97.7962
1170	Alcohol	F75	3	Yes	11	184.189
1171	Alcohol	F75	3	Yes	12	139.446
1172	Alcohol	F75	3	Yes	13	104.143
1173	Alcohol	F75	3	Yes	14	92.8468
1174	Alcohol	F75	3	Yes	15	90.0226
1175	Alcohol	F75	3	Yes	16	92.6311
1176	Alcohol	F75	3	Yes	17	94.6368
1177	Alcohol	F75	3	Yes	18	92.0815
1178	Alcohol	F75	3	Yes	19	94.5534
1179	Alcohol	F75	3	Yes	20	93.7152
1180	Alcohol	F75	3	Yes	21	100.309
1181	Alcohol	F75	3	Yes	22	110.479
1182	Alcohol	F75	3	Yes	23	102.975
1183	Alcohol	F75	3	Yes	24	95.6183
1184	Alcohol	F75	3	Yes	25	85.2272
1185	Alcohol	F75	3	Yes	26	98.2315
1186	Alcohol	F75	3	Yes	27	100.113
1187	Alcohol	F75	3	Yes	28	96.5067
1188	Alcohol	F75	3	Yes	29	91.4151
1189	Alcohol	F75	3	Yes	30	95.251
1190	Alcohol	F75	3	Yes	31	103.921
1191	Alcohol	F75	3	Yes	32	92.1697
1192	Alcohol	F75	3	Yes	33	99.1404
1193	Alcohol	F75	3	Yes	34	100.555
1194	Alcohol	F75	3	Yes	35	99.6832
1195	Alcohol	F75	3	Yes	36	98.01
1196	Alcohol	F75	3	Yes	37	96.9592
1197	Alcohol	F75	3	Yes	38	96.8188
1198	Alcohol	F75	3	Yes	39	89.5509
1199	Alcohol	F75	3	Yes	40	95.2269
1200	Water	F71	1	Yes	1	95.8731
1201	Water	F71	1	Yes	2	99.5459
1202	Water	F71	1	Yes	3	103.387
1203	Water	F71	1	Yes	4	104.468
1204	Water	F71	1	Yes	5	104.639
1205	Water	F71	1	Yes	6	91.8571
1206	Water	F71	1	Yes	7	95.3744
1207	Water	F71	1	Yes	8	102.339
1208	Water	F71	1	Yes	9	97.7977
1209	Water	F71	1	Yes	10	104.719
1210	Water	F71	1	Yes	11	162.368
1211	Water	F71	1	Yes	12	125.197
1212	Water	F71	1	Yes	13	107.546
1213	Water	F71	1	Yes	14	103.913
1214	Water	F71	1	Yes	15	91.0799
1215	Water	F71	1	Yes	16	86.1332
1216	Water	F71	1	Yes	17	94.9214
1217	Water	F71	1	Yes	18	95.3882
1218	Water	F71	1	Yes	19	98.8004
1219	Water	F71	1	Yes	20	92.0349
1220	Water	F71	1	Yes	21	96.4934
1221	Water	F71	1	Yes	22	108.603
1222	Water	F71	1	Yes	23	101.853
1223	Water	F71	1	Yes	24	102.223
1224	Water	F71	1	Yes	25	104.241
1225	Water	F71	1	Yes	26	101.934
1226	Water	F71	1	Yes	27	106.424
1227	Water	F71	1	Yes	28	95.9301
1228	Water	F71	1	Yes	29	98.0225
1229	Water	F71	1	Yes	30	103.533
1230	Water	F71	1	Yes	31	105.121
1231	Water	F71	1	Yes	32	99.8735
1232	Water	F71	1	Yes	33	103.06
1233	Water	F71	1	Yes	34	96.8582
1234	Water	F71	1	Yes	35	107.154
1235	Water	F71	1	Yes	36	102.025
1236	Water	F71	1	Yes	37	97.443
1237	Water	F71	1	Yes	38	96.4129
1238	Water	F71	1	Yes	39	94.2615
1239	Water	F71	1	Yes	40	93.1562
1240	Water	F71	2	Yes	1	96.9983
1241	Water	F71	2	Yes	2	101.452
1242	Water	F71	2	Yes	3	102.322
1243	Water	F71	2	Yes	4	101.509
1244	Water	F71	2	Yes	5	104.261
1245	Water	F71	2	Yes	6	89.5084
1246	Water	F71	2	Yes	7	99.4249
1247	Water	F71	2	Yes	8	101.441
1248	Water	F71	2	Yes	9	99.569
1249	Water	F71	2	Yes	10	103.515
1250	Water	F71	2	Yes	11	208.027
1251	Water	F71	2	Yes	12	119.054
1252	Water	F71	2	Yes	13	106.569
1253	Water	F71	2	Yes	14	97.8076
1254	Water	F71	2	Yes	15	98.4414
1255	Water	F71	2	Yes	16	100.43
1256	Water	F71	2	Yes	17	86.6942
1257	Water	F71	2	Yes	18	97.9716
1258	Water	F71	2	Yes	19	91.6198
1259	Water	F71	2	Yes	20	94.6357
1260	Water	F71	2	Yes	21	98.1819
1261	Water	F71	2	Yes	22	91.2674
1262	Water	F71	2	Yes	23	98.357
1263	Water	F71	2	Yes	24	95.0141
1264	Water	F71	2	Yes	25	90.6141
1265	Water	F71	2	Yes	26	106.206
1266	Water	F71	2	Yes	27	95.4409
1267	Water	F71	2	Yes	28	103.55
1268	Water	F71	2	Yes	29	99.2704
1269	Water	F71	2	Yes	30	97.9046
1270	Water	F71	2	Yes	31	94.254
1271	Water	F71	2	Yes	32	96.3982
1272	Water	F71	2	Yes	33	92.7781
1273	Water	F71	2	Yes	34	98.4421
1274	Water	F71	2	Yes	35	95.8209
1275	Water	F71	2	Yes	36	87.2825
1276	Water	F71	2	Yes	37	96.0402
1277	Water	F71	2	Yes	38	103.766
1278	Water	F71	2	Yes	39	94.522
1279	Water	F71	2	Yes	40	103.46
1280	Water	F71	3	Yes	1	94.2014
1281	Water	F71	3	Yes	2	103.921
1282	Water	F71	3	Yes	3	100.363
1283	Water	F71	3	Yes	4	95.8116
1284	Water	F71	3	Yes	5	103.557
1285	Water	F71	3	Yes	6	101.46
1286	Water	F71	3	Yes	7	99.3631
1287	Water	F71	3	Yes	8	101.2
1288	Water	F71	3	Yes	9	100.337
1289	Water	F71	3	Yes	10	99.7851
1290	Water	F71	3	Yes	11	130.151
1291	Water	F71	3	Yes	12	104.882
1292	Water	F71	3	Yes	13	87.9101
1293	Water	F71	3	Yes	14	84.047
1294	Water	F71	3	Yes	15	80.924
1295	Water	F71	3	Yes	16	87.7867
1296	Water	F71	3	Yes	17	90.5136
1297	Water	F71	3	Yes	18	91.5979
1298	Water	F71	3	Yes	19	93.6171
1299	Water	F71	3	Yes	20	91.7537
1300	Water	F71	3	Yes	21	87.8452
1301	Water	F71	3	Yes	22	84.06
1302	Water	F71	3	Yes	23	101.467
1303	Water	F71	3	Yes	24	102.765
1304	Water	F71	3	Yes	25	105.414
1305	Water	F71	3	Yes	26	100.824
1306	Water	F71	3	Yes	27	103.109
1307	Water	F71	3	Yes	28	102.369
1308	Water	F71	3	Yes	29	102.408
1309	Water	F71	3	Yes	30	104.44
1310	Water	F71	3	Yes	31	105.589
1311	Water	F71	3	Yes	32	102.259
1312	Water	F71	3	Yes	33	106.479
1313	Water	F71	3	Yes	34	101.136
1314	Water	F71	3	Yes	35	105.317
1315	Water	F71	3	Yes	36	107.459
1316	Water	F71	3	Yes	37	100.59
1317	Water	F71	3	Yes	38	103.414
1318	Water	F71	3	Yes	39	101.467
1319	Water	F71	3	Yes	40	100.616
