# Supplementary material for: The role of anterior insular cortex inputs to dorsolateral striatum in binge alcohol drinking
Source: eLife journal article supplement (doi:10.7554/elife.77411), 2022-07-28
Supplement: fig2-figsupp5-data1 [file Fig2S5F.xlsx]

## Sheet: Sheet1
	Fluid	PS Amplitude %
0	Water	96.6597
1	Water	97.0141
2	Water	102.709
3	Alcohol	109.403
4	Alcohol	122.342
5	Alcohol	136.25
6	Alcohol	131.715
7	Water	104.687
8	Water	129.421
9	Water	113.368
10	Alcohol	82.132
11	Alcohol	93.1477
12	Alcohol	95.3132
13	Alcohol	114.748
14	Alcohol	108.988
15	Alcohol	119.38
16	Water	107.115
17	Water	122.66
18	Water	100.537
