# Supplementary material for: The role of anterior insular cortex inputs to dorsolateral striatum in binge alcohol drinking
Source: eLife journal article supplement (doi:10.7554/elife.77411), 2022-07-28
Supplement: fig2-figsupp5-data1 [file Fig2S5H.xlsx]

## Sheet: Sheet1
	Fluid	Slices	Time min	Amplitude mV
0	Water	F71-1	5.5	0.568804
1	Water	F71-2	5.5	0.349227
2	Water	F71-3	5.5	0.470035
7	Water	F73-1	5.5	0.661417
8	Water	F73-2	5.5	0.536627
9	Water	F73-3	5.5	0.55632
16	Water	F80-1	5.5	0.832114
17	Water	F80-2	5.5	0.82236
18	Water	F80-3	5.5	0.480591
0	Water	F71-1	38	0.549805
1	Water	F71-2	38	0.338799
2	Water	F71-3	38	0.48277
7	Water	F73-1	38	0.692419
8	Water	F73-2	38	0.694507
9	Water	F73-3	38	0.630688
16	Water	F80-1	38	0.891315
17	Water	F80-2	38	1.0087
18	Water	F80-3	38	0.483173
