# Supplementary material for: The role of anterior insular cortex inputs to dorsolateral striatum in binge alcohol drinking
Source: eLife journal article supplement (doi:10.7554/elife.77411), 2022-07-28
Supplement: fig2-figsupp6-data1 [file Fig2S6B.xlsx]

## Sheet: Sheet1
	id	Fluid	StimState	Intake
0	G1	Alcohol	Light ON	2.16529
1	G2	Alcohol	Light ON	2.34955
2	G3	Alcohol	Light ON	1.94543
3	G4	Alcohol	Light ON	1.99093
4	G5	Alcohol	Light ON	2.90362
5	G6	Alcohol	Light ON	5.46907
6	G1	Alcohol	Light ON	3.05361
7	G2	Alcohol	Light ON	1.58595
8	G3	Alcohol	Light ON	1.94543
9	G4	Alcohol	Light ON	2.33224
10	G5	Alcohol	Light ON	3.14559
11	G6	Alcohol	Light ON	5.14353
12	G1	Alcohol	Light ON	1.33706
13	G2	Alcohol	Light ON	1.97564
14	G3	Alcohol	Light ON	0.379542
15	G4	Alcohol	Light ON	2.77756
16	G5	Alcohol	Light ON	2.27212
17	G6	Alcohol	Light ON	3.75641
18	G1	Alcohol	Light ON	1.78275
19	G2	Alcohol	Light ON	1.51078
20	G3	Alcohol	Light ON	1.03019
21	G4	Alcohol	Light ON	0.963643
22	G5	Alcohol	Light ON	2.88621
23	G6	Alcohol	Light ON	4.41543
24	G1	Alcohol	Light ON	3.85731
25	G2	Alcohol	Light ON	5.46145
26	G3	Alcohol	Light ON	3.97245
27	G4	Alcohol	Light ON	4.17832
28	G5	Alcohol	Light ON	4.54424
29	G6	Alcohol	Light ON	5.33885
30	G1	Alcohol	Light ON	2.39557
31	G2	Alcohol	Light ON	0.349897
32	G3	Alcohol	Light ON	0.540396
33	G4	Alcohol	Light ON	1.41712
34	G5	Alcohol	Light ON	3.48708
35	G6	Alcohol	Light ON	2.24067
36	G1	Alcohol	Light ON	3.23123
37	G2	Alcohol	Light ON	0
38	G3	Alcohol	Light ON	1.02675
39	G4	Alcohol	Light ON	1.75723
40	G5	Alcohol	Light ON	2.01884
41	G6	Alcohol	Light ON	3.16329
42	G1	Alcohol	Light ON	2.79326
43	G2	Alcohol	Light ON	0.115387
44	G3	Alcohol	Light ON	0.751544
45	G4	Alcohol	Light ON	1.76456
46	G5	Alcohol	Light ON	2.14569
47	G6	Alcohol	Light ON	2.16596
48	G1	Alcohol	Light ON	1.75264
49	G2	Alcohol	Light ON	0.461548
50	G3	Alcohol	Light ON	1.50309
51	G4	Alcohol	Light ON	1.32342
52	G5	Alcohol	Light ON	2.20529
53	G6	Alcohol	Light ON	2.03469
54	G1	Alcohol	Light ON	4.60067
55	G2	Alcohol	Light ON	2.82698
56	G3	Alcohol	Light ON	3.59668
57	G4	Alcohol	Light ON	6.17596
58	G5	Alcohol	Light ON	5.12582
59	G6	Alcohol	Light ON	4.59446
60	G1	Alcohol	Light ON	4.7121
61	G2	Alcohol	Light ON	0.522964
62	G3	Alcohol	Light ON	2.1544
63	G4	Alcohol	Light ON	1.68289
64	G5	Alcohol	Light ON	2.92052
65	G6	Alcohol	Light ON	2.18732
66	G1	Alcohol	Light ON	2.18776
67	G2	Alcohol	Light ON	1.04593
68	G3	Alcohol	Light ON	3.71635
69	G4	Alcohol	Light ON	2.07557
70	G5	Alcohol	Light ON	3.75496
71	G6	Alcohol	Light ON	2.83065
72	G1	Alcohol	Light ON	2.84803
73	G2	Alcohol	Light ON	0.23841
74	G3	Alcohol	Light ON	2.72927
75	G4	Alcohol	Light ON	2.66497
76	G5	Alcohol	Light ON	3.9498
77	G6	Alcohol	Light ON	2.79964
78	G1	Alcohol	Light ON	3.17665
79	G2	Alcohol	Light ON	0.71523
80	G3	Alcohol	Light ON	2.238
81	G4	Alcohol	Light ON	2.10977
82	G5	Alcohol	Light ON	2.12228
83	G6	Alcohol	Light ON	2.01835
84	G1	Alcohol	Light ON	2.95757
85	G2	Alcohol	Light ON	2.2649
86	G3	Alcohol	Light ON	4.36684
87	G4	Alcohol	Light ON	4.55265
88	G5	Alcohol	Light ON	4.00876
89	G6	Alcohol	Light ON	4.03669
90	D1	Alcohol	Light OFF	0.71734
91	D2	Alcohol	Light OFF	1.96112
92	D3	Alcohol	Light OFF	0
93	D4	Alcohol	Light OFF	0.686944
94	D5	Alcohol	Light OFF	3.07334
95	D7	Alcohol	Light OFF	0
96	D1	Alcohol	Light OFF	0
97	D2	Alcohol	Light OFF	1.96112
98	D3	Alcohol	Light OFF	0
99	D4	Alcohol	Light OFF	0
100	D5	Alcohol	Light OFF	1.53667
101	D7	Alcohol	Light OFF	4.05297
102	D1	Alcohol	Light OFF	0
103	D2	Alcohol	Light OFF	2.66862
104	D3	Alcohol	Light OFF	0.743664
105	D4	Alcohol	Light OFF	0
106	D5	Alcohol	Light OFF	2.30501
107	D7	Alcohol	Light OFF	3.82356
108	D1	Alcohol	Light OFF	2.13314
109	D2	Alcohol	Light OFF	2.66862
110	D3	Alcohol	Light OFF	0
111	D4	Alcohol	Light OFF	0
112	D5	Alcohol	Light OFF	3.84168
113	D7	Alcohol	Light OFF	5.35298
114	D1	Alcohol	Light OFF	2.93428
115	D2	Alcohol	Light OFF	7.21987
116	D3	Alcohol	Light OFF	0.768336
117	D4	Alcohol	Light OFF	0.743664
118	D5	Alcohol	Light OFF	3.13273
119	D7	Alcohol	Light OFF	5.42982
120	D1	Alcohol	Light OFF	2.12383
121	D2	Alcohol	Light OFF	1.33983
122	D3	Alcohol	Light OFF	0.736904
123	D4	Alcohol	Light OFF	0.730265
124	D5	Alcohol	Light OFF	2.21071
125	D7	Alcohol	Light OFF	2.97466
126	D1	Alcohol	Light OFF	2.83177
127	D2	Alcohol	Light OFF	1.33983
128	D3	Alcohol	Light OFF	1.47381
129	D4	Alcohol	Light OFF	0.730265
130	D5	Alcohol	Light OFF	2.94762
131	D7	Alcohol	Light OFF	2.97466
132	D1	Alcohol	Light OFF	3.47895
133	D2	Alcohol	Light OFF	2.61482
134	D3	Alcohol	Light OFF	2.13314
135	D4	Alcohol	Light OFF	4.1392
136	D5	Alcohol	Light OFF	3.66785
137	D7	Alcohol	Light OFF	7.07943
138	D1	Alcohol	Light OFF	2.78316
139	D2	Alcohol	Light OFF	1.96112
140	D3	Alcohol	Light OFF	1.4221
141	D4	Alcohol	Light OFF	3.44934
142	D5	Alcohol	Light OFF	3.66785
143	D7	Alcohol	Light OFF	6.37148
144	D1	Alcohol	Light OFF	4.06993
145	D2	Alcohol	Light OFF	3.20393
146	D3	Alcohol	Light OFF	2.83177
147	D4	Alcohol	Light OFF	2.70198
148	D5	Alcohol	Light OFF	5.11186
149	D7	Alcohol	Light OFF	7.1418
150	D1	Alcohol	Light OFF	2.0696
151	D2	Alcohol	Light OFF	3.19132
152	D3	Alcohol	Light OFF	0.701813
153	D4	Alcohol	Light OFF	3.39161
154	D5	Alcohol	Light OFF	3.61872
155	D7	Alcohol	Light OFF	4.22919
156	D1	Alcohol	Light OFF	2.75947
157	D2	Alcohol	Light OFF	4.46784
158	D3	Alcohol	Light OFF	0
159	D4	Alcohol	Light OFF	4.74825
160	D5	Alcohol	Light OFF	3.61872
161	D7	Alcohol	Light OFF	4.93405
162	D1	Alcohol	Light OFF	4.01948
163	D2	Alcohol	Light OFF	4.39857
164	D3	Alcohol	Light OFF	0
165	D4	Alcohol	Light OFF	5.22964
166	D5	Alcohol	Light OFF	2.84419
167	D7	Alcohol	Light OFF	3.52432
168	D1	Alcohol	Light OFF	2.67965
169	D2	Alcohol	Light OFF	3.14184
170	D3	Alcohol	Light OFF	0
171	D4	Alcohol	Light OFF	4.57594
172	D5	Alcohol	Light OFF	4.26629
173	D7	Alcohol	Light OFF	6.34378
174	D1	Alcohol	Light OFF	2.06083
175	D2	Alcohol	Light OFF	0.640786
176	D3	Alcohol	Light OFF	2.05214
177	D4	Alcohol	Light OFF	5.20864
178	D5	Alcohol	Light OFF	5.0437
179	D7	Alcohol	Light OFF	4.87052
180	D8	Alcohol	Light OFF	0.686944
181	D9	Alcohol	Light OFF	0
185	D8	Alcohol	Light OFF	2.61039
186	D9	Alcohol	Light OFF	0.156637
190	D8	Alcohol	Light OFF	1.749
191	D9	Alcohol	Light OFF	0.0806561
195	D8	Alcohol	Light OFF	2.55623
196	D9	Alcohol	Light OFF	0.0806561
200	D8	Alcohol	Light OFF	2.71301
201	D9	Alcohol	Light OFF	0
205	D8	Alcohol	Light OFF	4.05297
206	D9	Alcohol	Light OFF	0.971219
210	D8	Alcohol	Light OFF	1.43413
211	D9	Alcohol	Light OFF	1.12064
215	D8	Alcohol	Light OFF	2.90824
216	D9	Alcohol	Light OFF	0.149418
220	D8	Alcohol	Light OFF	3.03199
221	D9	Alcohol	Light OFF	2.68953
225	D8	Alcohol	Light OFF	4.64081
226	D9	Alcohol	Light OFF	2.37973
230	D8	Alcohol	Light OFF	3.35006
231	D9	Alcohol	Light OFF	0
235	D8	Alcohol	Light OFF	4.06793
236	D9	Alcohol	Light OFF	0.880283
240	D8	Alcohol	Light OFF	2.89921
241	D9	Alcohol	Light OFF	1.4932
245	D8	Alcohol	Light OFF	3.01754
246	D9	Alcohol	Light OFF	2.48867
250	D8	Alcohol	Light OFF	4.9109
251	D9	Alcohol	Light OFF	3.89085
258	D28	Alcohol	Light OFF	0
260	D34	Alcohol	Light OFF	0.212383
264	D28	Alcohol	Light OFF	1.40682
266	D34	Alcohol	Light OFF	0
270	D28	Alcohol	Light OFF	1.81573
272	D34	Alcohol	Light OFF	0
276	D28	Alcohol	Light OFF	3.30722
278	D34	Alcohol	Light OFF	0.137973
282	D28	Alcohol	Light OFF	5.14966
284	D34	Alcohol	Light OFF	0.212383
288	D28	Alcohol	Light OFF	2.76482
290	D34	Alcohol	Light OFF	0.20696
294	D28	Alcohol	Light OFF	3.14184
296	D34	Alcohol	Light OFF	0.0689867
300	D28	Alcohol	Light OFF	2.9764
302	D34	Alcohol	Light OFF	0.0684046
306	D28	Alcohol	Light OFF	2.40645
308	D34	Alcohol	Light OFF	2.87299
312	D28	Alcohol	Light OFF	3.76017
314	D34	Alcohol	Light OFF	6.09678
318	D28	Alcohol	Light OFF	3.04361
320	D34	Alcohol	Light OFF	1.9754
324	D28	Alcohol	Light OFF	2.60881
326	D34	Alcohol	Light OFF	3.13339
330	D28	Alcohol	Light OFF	2.99767
332	D34	Alcohol	Light OFF	4.13637
336	D28	Alcohol	Light OFF	2.93649
338	D34	Alcohol	Light OFF	3.33578
342	D28	Alcohol	Light OFF	5.01651
344	D34	Alcohol	Light OFF	4.57594
375	E1	Alcohol	Light OFF	0.146053
376	E8	Alcohol	Light OFF	0.657239
377	E1	Alcohol	Light OFF	1.60658
378	E8	Alcohol	Light OFF	1.24145
379	E1	Alcohol	Light OFF	1.19308
380	E8	Alcohol	Light OFF	1.64261
381	E1	Alcohol	Light OFF	1.8949
382	E8	Alcohol	Light OFF	2.14254
383	E1	Alcohol	Light OFF	3.86326
384	E8	Alcohol	Light OFF	3.29733
385	E1	Alcohol	Light OFF	1.63481
386	E8	Alcohol	Light OFF	2.73618
387	E1	Alcohol	Light OFF	2.86092
388	E8	Alcohol	Light OFF	2.80459
389	E1	Alcohol	Light OFF	1.63481
390	E8	Alcohol	Light OFF	2.89744
391	E1	Alcohol	Light OFF	2.58845
392	E8	Alcohol	Light OFF	4.1392
393	E1	Alcohol	Light OFF	2.98461
394	E8	Alcohol	Light OFF	3.40937
395	E1	Alcohol	Light OFF	2.31598
396	E8	Alcohol	Light OFF	3.13339
397	E1	Alcohol	Light OFF	2.91152
398	E8	Alcohol	Light OFF	1.90728
399	E1	Alcohol	Light OFF	2.60662
400	E8	Alcohol	Light OFF	2.96559
401	E1	Alcohol	Light OFF	2.86092
402	E8	Alcohol	Light OFF	2.96559
403	E1	Alcohol	Light OFF	3.90879
404	E8	Alcohol	Light OFF	3.8695
405	F1	Alcohol	Light OFF	0.277126
406	F7	Alcohol	Light OFF	1.61417
407	F1	Alcohol	Light OFF	0.207845
408	F7	Alcohol	Light OFF	0.771995
409	F1	Alcohol	Light OFF	0.203496
410	F7	Alcohol	Light OFF	0.568838
411	F1	Alcohol	Light OFF	0.406993
412	F7	Alcohol	Light OFF	2.06204
413	F1	Alcohol	Light OFF	0.542657
414	F7	Alcohol	Light OFF	0.415689
415	F1	Alcohol	Light OFF	0.32554
416	F7	Alcohol	Light OFF	0.201808
417	F1	Alcohol	Light OFF	1.36727
418	F7	Alcohol	Light OFF	0.403615
419	F1	Alcohol	Light OFF	0.445032
420	F7	Alcohol	Light OFF	0.32554
421	F1	Alcohol	Light OFF	2.22516
422	F7	Alcohol	Light OFF	2.40899
423	F1	Alcohol	Light OFF	2.82765
424	F7	Alcohol	Light OFF	2.92986
425	F1	Alcohol	Light OFF	1.99531
426	F7	Alcohol	Light OFF	2.33401
427	F1	Alcohol	Light OFF	0.498827
428	F7	Alcohol	Light OFF	2.33401
429	F1	Alcohol	Light OFF	0.559031
430	F7	Alcohol	Light OFF	2.12515
431	F1	Alcohol	Light OFF	1.49075
432	F7	Alcohol	Light OFF	2.97521
433	F1	Alcohol	Light OFF	3.90286
434	F7	Alcohol	Light OFF	5.69272
