# Supplementary material for: The role of anterior insular cortex inputs to dorsolateral striatum in binge alcohol drinking
Source: eLife journal article supplement (doi:10.7554/elife.77411), 2022-07-28
Supplement: fig3-data1 [file Fig3A.xlsx]

## Sheet: Sheet1
	Fluid	Virus	ID	DIDWeek	Var % Change
86	Water	ChR2	E12	3	0
87	Water	ChR2	E12	4	34.7881
88	Water	ChR2	E12	5	-41.05
89	Water	ChR2	E12	6	-57.8748
92	Water	eGFP	E13	3	0
93	Water	eGFP	E13	4	37.7171
94	Water	eGFP	E13	5	136.973
95	Water	eGFP	E13	6	29.0323
98	Water	eGFP	E14	3	0
99	Water	eGFP	E14	4	-31.4979
100	Water	eGFP	E14	5	0.17762
101	Water	eGFP	E14	6	-23.209
104	Water	eGFP	E15	3	0
105	Water	eGFP	E15	4	-25.3359
106	Water	eGFP	E15	5	-17.8503
107	Water	eGFP	E15	6	-49.7121
110	Water	ChR2	E16	3	0
111	Water	ChR2	E16	4	6.89238
112	Water	ChR2	E16	5	42.3216
113	Water	ChR2	E16	6	8.46433
116	Water	ChR2	E19	3	0
117	Water	ChR2	E19	4	-21.9235
118	Water	ChR2	E19	5	44.9845
119	Water	ChR2	E19	6	50.2585
122	Water	ChR2	E21	3	0
123	Water	ChR2	E21	4	-28.7791
124	Water	ChR2	E21	5	-31.3953
125	Water	ChR2	E21	6	-24.6124
128	Water	ChR2	E22	3	0
129	Water	ChR2	E22	4	50.8911
130	Water	ChR2	E22	5	14.0594
131	Water	ChR2	E22	6	-26.7327
134	Water	ChR2	E23	3	0
135	Water	ChR2	E23	4	100.859
136	Water	ChR2	E23	5	66.6985
137	Water	ChR2	E23	6	37.2137
152	Water	ChR2	F13	3	0
153	Water	ChR2	F13	4	-4.27447
154	Water	ChR2	F13	5	35.4331
155	Water	ChR2	F13	6	49.3813
158	Water	eGFP	F15	3	0
159	Water	eGFP	F15	4	-28.365
160	Water	eGFP	F15	5	-39.924
161	Water	eGFP	F15	6	-16.654
164	Water	eGFP	F16	3	0
165	Water	eGFP	F16	4	45.7823
166	Water	eGFP	F16	5	-17.7361
167	Water	eGFP	F16	6	35.1118
170	Water	eGFP	F30	3	0
171	Water	eGFP	F30	4	-9.75456
172	Water	eGFP	F30	5	-28.1938
173	Water	eGFP	F30	6	-89.2385
176	Water	eGFP	F31	3	0
177	Water	eGFP	F31	4	-26.3959
178	Water	eGFP	F31	5	-40.9898
179	Water	eGFP	F31	6	-52.4112
182	Water	eGFP	F32	3	0
183	Water	eGFP	F32	4	24.3665
184	Water	eGFP	F32	5	5.16569
185	Water	eGFP	F32	6	-34.8928
188	Water	eGFP	F33	3	0
189	Water	eGFP	F33	4	-33.1794
190	Water	eGFP	F33	5	-86.4116
191	Water	eGFP	F33	6	-55.8707
194	Water	eGFP	F34	3	0
195	Water	eGFP	F34	4	-22.5705
196	Water	eGFP	F34	5	-9.71787
197	Water	eGFP	F34	6	40.5172
200	Water	eGFP	F35	3	0
201	Water	eGFP	F35	4	-38.7692
202	Water	eGFP	F35	5	-44.4615
203	Water	eGFP	F35	6	-26.6667
206	Water	ChR2	F9	3	0
207	Water	ChR2	F9	4	33.9676
208	Water	ChR2	F9	5	41.8649
209	Water	ChR2	F9	6	-16.4605
