# Supplementary material for: The role of anterior insular cortex inputs to dorsolateral striatum in binge alcohol drinking
Source: eLife journal article supplement (doi:10.7554/elife.77411), 2022-07-28
Supplement: fig3-data1 [file Fig3B.xlsx]

## Sheet: Sheet1
	Fluid	Virus	ID	DIDWeek	Var % Change
86	Water	ChR2	E12	3	0
87	Water	ChR2	E12	4	15.8765
88	Water	ChR2	E12	5	-29.6173
89	Water	ChR2	E12	6	-7.30864
92	Water	eGFP	E13	3	0
93	Water	eGFP	E13	4	-6.79672
94	Water	eGFP	E13	5	10.5055
95	Water	eGFP	E13	6	-1.87784
98	Water	eGFP	E14	3	0
99	Water	eGFP	E14	4	-47.4222
100	Water	eGFP	E14	5	-4.13281
101	Water	eGFP	E14	6	-58.896
104	Water	eGFP	E15	3	0
105	Water	eGFP	E15	4	-24.1846
106	Water	eGFP	E15	5	-17.3209
107	Water	eGFP	E15	6	-7.92036
110	Water	ChR2	E16	3	0
111	Water	ChR2	E16	4	54.3224
112	Water	ChR2	E16	5	279.476
113	Water	ChR2	E16	6	152.315
116	Water	ChR2	E19	3	0
117	Water	ChR2	E19	4	-30.0937
118	Water	ChR2	E19	5	-8.61858
119	Water	ChR2	E19	6	-22.7588
122	Water	ChR2	E21	3	0
123	Water	ChR2	E21	4	-7.01395
124	Water	ChR2	E21	5	-35.1723
125	Water	ChR2	E21	6	-29.6349
128	Water	ChR2	E22	3	0
129	Water	ChR2	E22	4	42.0567
130	Water	ChR2	E22	5	31.4655
131	Water	ChR2	E22	6	-2.21675
134	Water	ChR2	E23	3	0
135	Water	ChR2	E23	4	12.9209
136	Water	ChR2	E23	5	10.8743
137	Water	ChR2	E23	6	-27.2376
152	Water	ChR2	F13	3	0
153	Water	ChR2	F13	4	-32.5039
154	Water	ChR2	F13	5	-4.5642
155	Water	ChR2	F13	6	-1.26546
158	Water	eGFP	F15	3	0
159	Water	eGFP	F15	4	-17.939
160	Water	eGFP	F15	5	-2.44733
161	Water	eGFP	F15	6	-7.71177
164	Water	eGFP	F16	3	0
165	Water	eGFP	F16	4	54.5927
166	Water	eGFP	F16	5	17.7864
167	Water	eGFP	F16	6	8.35768
170	Water	eGFP	F30	3	0
171	Water	eGFP	F30	4	-15.4588
172	Water	eGFP	F30	5	-36.522
173	Water	eGFP	F30	6	-74.3723
176	Water	eGFP	F31	3	0
177	Water	eGFP	F31	4	-33.84
178	Water	eGFP	F31	5	13.36
179	Water	eGFP	F31	6	72.48
182	Water	eGFP	F32	3	0
183	Water	eGFP	F32	4	-21.927
184	Water	eGFP	F32	5	-1.13324
185	Water	eGFP	F32	6	22.2501
188	Water	eGFP	F33	3	0
189	Water	eGFP	F33	4	-4.96005
190	Water	eGFP	F33	5	-85.2641
191	Water	eGFP	F33	6	11.7954
194	Water	eGFP	F34	3	0
195	Water	eGFP	F34	4	-29.7082
196	Water	eGFP	F34	5	-30.1662
197	Water	eGFP	F34	6	25.2323
200	Water	eGFP	F35	3	0
201	Water	eGFP	F35	4	-47.5671
202	Water	eGFP	F35	5	-70.5163
203	Water	eGFP	F35	6	-56.4624
206	Water	ChR2	F9	3	0
207	Water	ChR2	F9	4	19.764
208	Water	ChR2	F9	5	13.5355
209	Water	ChR2	F9	6	-9.27312
