# Supplementary material for: The role of anterior insular cortex inputs to dorsolateral striatum in binge alcohol drinking
Source: eLife journal article supplement (doi:10.7554/elife.77411), 2022-07-28
Supplement: fig3-data1 [file Fig3C.xlsx]

## Sheet: Sheet1
	Fluid	Virus	ID	DIDWeek	Var % Change
86	Water	ChR2	E12	3	0
87	Water	ChR2	E12	4	23.3846
88	Water	ChR2	E12	5	-27.0769
89	Water	ChR2	E12	6	-27.6923
92	Water	eGFP	E13	3	0
93	Water	eGFP	E13	4	9.66184
94	Water	eGFP	E13	5	57.4879
95	Water	eGFP	E13	6	23.6715
98	Water	eGFP	E14	3	0
99	Water	eGFP	E14	4	-24.0469
100	Water	eGFP	E14	5	-1.46628
101	Water	eGFP	E14	6	-13.4897
104	Water	eGFP	E15	3	0
105	Water	eGFP	E15	4	-16.7553
106	Water	eGFP	E15	5	-11.7021
107	Water	eGFP	E15	6	-19.9468
110	Water	ChR2	E16	3	0
111	Water	ChR2	E16	4	-1.85874
112	Water	ChR2	E16	5	40.8922
113	Water	ChR2	E16	6	11.5242
116	Water	ChR2	E19	3	0
117	Water	ChR2	E19	4	-18.1185
118	Water	ChR2	E19	5	10.1045
119	Water	ChR2	E19	6	22.6481
122	Water	ChR2	E21	3	0
123	Water	ChR2	E21	4	-30.7692
124	Water	ChR2	E21	5	-31.8302
125	Water	ChR2	E21	6	-28.382
128	Water	ChR2	E22	3	0
129	Water	ChR2	E22	4	40.6897
130	Water	ChR2	E22	5	24.8276
131	Water	ChR2	E22	6	-3.44828
134	Water	ChR2	E23	3	0
135	Water	ChR2	E23	4	72.9927
136	Water	ChR2	E23	5	79.1971
137	Water	ChR2	E23	6	73.7226
152	Water	ChR2	F13	3	0
153	Water	ChR2	F13	4	-4.01003
154	Water	ChR2	F13	5	6.01504
155	Water	ChR2	F13	6	17.7945
158	Water	eGFP	F15	3	0
159	Water	eGFP	F15	4	-15.9363
160	Water	eGFP	F15	5	-10.3586
161	Water	eGFP	F15	6	-7.17131
164	Water	eGFP	F16	3	0
165	Water	eGFP	F16	4	22.8438
166	Water	eGFP	F16	5	-10.4895
167	Water	eGFP	F16	6	3.4965
170	Water	eGFP	F30	3	0
171	Water	eGFP	F30	4	-6.96379
172	Water	eGFP	F30	5	-14.4847
173	Water	eGFP	F30	6	-80.7799
176	Water	eGFP	F31	3	0
177	Water	eGFP	F31	4	-14.2157
178	Water	eGFP	F31	5	-37.7451
179	Water	eGFP	F31	6	-18.1373
182	Water	eGFP	F32	3	0
183	Water	eGFP	F32	4	0.343643
184	Water	eGFP	F32	5	-2.4055
185	Water	eGFP	F32	6	7.21649
188	Water	eGFP	F33	3	0
189	Water	eGFP	F33	4	-10.5485
190	Water	eGFP	F33	5	-82.2785
191	Water	eGFP	F33	6	-20.2532
194	Water	eGFP	F34	3	0
195	Water	eGFP	F34	4	-11.9874
196	Water	eGFP	F34	5	0.315457
197	Water	eGFP	F34	6	31.8612
200	Water	eGFP	F35	3	0
201	Water	eGFP	F35	4	-6.03015
202	Water	eGFP	F35	5	-17.0854
203	Water	eGFP	F35	6	-14.0704
206	Water	ChR2	F9	3	0
207	Water	ChR2	F9	4	4.63768
208	Water	ChR2	F9	5	20.8696
209	Water	ChR2	F9	6	-17.971
