# Supplementary material for: The role of anterior insular cortex inputs to dorsolateral striatum in binge alcohol drinking
Source: eLife journal article supplement (doi:10.7554/elife.77411), 2022-07-28
Supplement: fig3-data1 [file Fig3D.xlsx]

## Sheet: Sheet1
	Fluid	Virus	ID	DIDWeek	Var % Change
86	Water	ChR2	E12	3	0
87	Water	ChR2	E12	4	947.409
88	Water	ChR2	E12	5	-9.40499
89	Water	ChR2	E12	6	356.622
92	Water	eGFP	E13	3	0
93	Water	eGFP	E13	4	11.1969
94	Water	eGFP	E13	5	-1.1583
95	Water	eGFP	E13	6	-47.4903
98	Water	eGFP	E14	3	0
99	Water	eGFP	E14	4	36.0719
100	Water	eGFP	E14	5	49.3582
101	Water	eGFP	E14	6	7.12452
104	Water	eGFP	E15	3	0
105	Water	eGFP	E15	4	-31.1698
106	Water	eGFP	E15	5	-74.6792
107	Water	eGFP	E15	6	-74.7925
110	Water	ChR2	E16	3	0
111	Water	ChR2	E16	4	326.642
112	Water	ChR2	E16	5	43.7956
113	Water	ChR2	E16	6	65.146
116	Water	ChR2	E19	3	0
117	Water	ChR2	E19	4	28.4858
118	Water	ChR2	E19	5	162.092
119	Water	ChR2	E19	6	-72.3856
122	Water	ChR2	E21	3	0
123	Water	ChR2	E21	4	2.83768
124	Water	ChR2	E21	5	-53.0079
125	Water	ChR2	E21	6	-10.5562
128	Water	ChR2	E22	3	0
129	Water	ChR2	E22	4	129.06
130	Water	ChR2	E22	5	0.42735
131	Water	ChR2	E22	6	-49.5299
134	Water	ChR2	E23	3	0
135	Water	ChR2	E23	4	-84.7903
136	Water	ChR2	E23	5	-73.2765
137	Water	ChR2	E23	6	-52.5942
152	Water	ChR2	F13	3	0
153	Water	ChR2	F13	4	-43.1185
154	Water	ChR2	F13	5	-59.0592
155	Water	ChR2	F13	6	-48.3449
158	Water	eGFP	F15	3	0
159	Water	eGFP	F15	4	53.8389
160	Water	eGFP	F15	5	66.0793
161	Water	eGFP	F15	6	0.629327
164	Water	eGFP	F16	3	0
165	Water	eGFP	F16	4	137.978
166	Water	eGFP	F16	5	6.5659
167	Water	eGFP	F16	6	-62.2107
170	Water	eGFP	F30	3	0
171	Water	eGFP	F30	4	17.7147
172	Water	eGFP	F30	5	-29.9977
173	Water	eGFP	F30	6	-76.8312
176	Water	eGFP	F31	3	0
177	Water	eGFP	F31	4	-48.7515
178	Water	eGFP	F31	5	-78.7556
179	Water	eGFP	F31	6	-84.7319
182	Water	eGFP	F32	3	0
183	Water	eGFP	F32	4	8.27138
184	Water	eGFP	F32	5	-28.9033
185	Water	eGFP	F32	6	-71.2825
188	Water	eGFP	F33	3	0
189	Water	eGFP	F33	4	-70.0348
190	Water	eGFP	F33	5	-82.8697
191	Water	eGFP	F33	6	-89.3434
194	Water	eGFP	F34	3	0
195	Water	eGFP	F34	4	-40.0871
196	Water	eGFP	F34	5	-49.2647
197	Water	eGFP	F34	6	-23.8562
200	Water	eGFP	F35	3	0
201	Water	eGFP	F35	4	-23.494
202	Water	eGFP	F35	5	-60.0402
203	Water	eGFP	F35	6	8.03213
206	Water	ChR2	F9	3	0
207	Water	ChR2	F9	4	3.00429
208	Water	ChR2	F9	5	-34.4778
209	Water	ChR2	F9	6	-7.58226
