# Supplementary material for: The role of anterior insular cortex inputs to dorsolateral striatum in binge alcohol drinking
Source: eLife journal article supplement (doi:10.7554/elife.77411), 2022-07-28
Supplement: fig3-data1 [file Fig3E.xlsx]

## Sheet: Sheet1
	Fluid	Virus	ID	DIDWeek	Var % Change
86	Water	ChR2	E12	3	0
87	Water	ChR2	E12	4	5.88235
88	Water	ChR2	E12	5	46.1176
89	Water	ChR2	E12	6	-25.6471
92	Water	eGFP	E13	3	0
93	Water	eGFP	E13	4	129.673
94	Water	eGFP	E13	5	109.112
95	Water	eGFP	E13	6	110.514
98	Water	eGFP	E14	3	0
99	Water	eGFP	E14	4	28.3051
100	Water	eGFP	E14	5	-3.89831
101	Water	eGFP	E14	6	13.0508
104	Water	eGFP	E15	3	0
105	Water	eGFP	E15	4	4.97592
106	Water	eGFP	E15	5	5.77849
107	Water	eGFP	E15	6	53.2905
110	Water	ChR2	E16	3	0
111	Water	ChR2	E16	4	-3.9897
112	Water	ChR2	E16	5	-25.74
113	Water	ChR2	E16	6	-10.296
116	Water	ChR2	E19	3	0
117	Water	ChR2	E19	4	25.9972
118	Water	ChR2	E19	5	-13.3425
119	Water	ChR2	E19	6	-14.1678
122	Water	ChR2	E21	3	0
123	Water	ChR2	E21	4	49.4465
124	Water	ChR2	E21	5	46.679
125	Water	ChR2	E21	6	44.2804
128	Water	ChR2	E22	3	0
129	Water	ChR2	E22	4	80.0705
130	Water	ChR2	E22	5	172.487
131	Water	ChR2	E22	6	466.314
134	Water	ChR2	E23	3	0
135	Water	ChR2	E23	4	21.1886
136	Water	ChR2	E23	5	10.0775
137	Water	ChR2	E23	6	13.9535
152	Water	ChR2	F13	3	0
153	Water	ChR2	F13	4	8.67052
154	Water	ChR2	F13	5	-6.35838
155	Water	ChR2	F13	6	-13.1021
158	Water	eGFP	F15	3	0
159	Water	eGFP	F15	4	14.4099
160	Water	eGFP	F15	5	-0.869565
161	Water	eGFP	F15	6	11.1801
164	Water	eGFP	F16	3	0
165	Water	eGFP	F16	4	25.1064
166	Water	eGFP	F16	5	14.0426
167	Water	eGFP	F16	6	22.9787
170	Water	eGFP	F30	3	0
171	Water	eGFP	F30	4	14.6045
172	Water	eGFP	F30	5	25.1521
173	Water	eGFP	F30	6	172.819
176	Water	eGFP	F31	3	0
177	Water	eGFP	F31	4	33.8074
178	Water	eGFP	F31	5	166.302
179	Water	eGFP	F31	6	18.5996
182	Water	eGFP	F32	3	0
183	Water	eGFP	F32	4	11.5328
184	Water	eGFP	F32	5	1.60584
185	Water	eGFP	F32	6	84.9635
188	Water	eGFP	F33	3	0
189	Water	eGFP	F33	4	25.2674
190	Water	eGFP	F33	5	70.7219
191	Water	eGFP	F33	6	59.7594
194	Water	eGFP	F34	3	0
195	Water	eGFP	F34	4	31.68
196	Water	eGFP	F34	5	5.28
197	Water	eGFP	F34	6	12.48
200	Water	eGFP	F35	3	0
201	Water	eGFP	F35	4	21.8075
202	Water	eGFP	F35	5	36.7387
203	Water	eGFP	F35	6	50.8841
206	Water	ChR2	F9	3	0
207	Water	ChR2	F9	4	0.521739
208	Water	ChR2	F9	5	-15.1304
209	Water	ChR2	F9	6	31.4783
