# Supplementary material for: The role of anterior insular cortex inputs to dorsolateral striatum in binge alcohol drinking
Source: eLife journal article supplement (doi:10.7554/elife.77411), 2022-07-28
Supplement: fig3-data1 [file Fig3F.xlsx]

## Sheet: Sheet1
	Fluid	Virus	ID	DIDWeek	Var % Change
86	Water	ChR2	E12	3	0
87	Water	ChR2	E12	4	-20
88	Water	ChR2	E12	5	-45.7143
89	Water	ChR2	E12	6	37.1429
92	Water	eGFP	E13	3	0
93	Water	eGFP	E13	4	33.3333
94	Water	eGFP	E13	5	155.556
95	Water	eGFP	E13	6	93.3333
98	Water	eGFP	E14	3	0
99	Water	eGFP	E14	4	-42.623
100	Water	eGFP	E14	5	-27.8689
101	Water	eGFP	E14	6	0
104	Water	eGFP	E15	3	0
105	Water	eGFP	E15	4	8.33333
106	Water	eGFP	E15	5	11.1111
107	Water	eGFP	E15	6	36.1111
110	Water	ChR2	E16	3	0
111	Water	ChR2	E16	4	9.52381
112	Water	ChR2	E16	5	121.429
113	Water	ChR2	E16	6	42.8571
116	Water	ChR2	E19	3	0
117	Water	ChR2	E19	4	-39.5349
118	Water	ChR2	E19	5	-25.5814
119	Water	ChR2	E19	6	44.186
122	Water	ChR2	E21	3	0
123	Water	ChR2	E21	4	-39.0625
124	Water	ChR2	E21	5	-17.1875
125	Water	ChR2	E21	6	-15.625
128	Water	ChR2	E22	3	0
129	Water	ChR2	E22	4	33.3333
130	Water	ChR2	E22	5	33.3333
131	Water	ChR2	E22	6	258.333
134	Water	ChR2	E23	3	0
135	Water	ChR2	E23	4	74.359
136	Water	ChR2	E23	5	125.641
137	Water	ChR2	E23	6	192.308
152	Water	ChR2	F13	3	0
153	Water	ChR2	F13	4	104.762
154	Water	ChR2	F13	5	121.429
155	Water	ChR2	F13	6	35.7143
158	Water	eGFP	F15	3	0
159	Water	eGFP	F15	4	12.5
160	Water	eGFP	F15	5	-62.5
161	Water	eGFP	F15	6	-15.625
164	Water	eGFP	F16	3	0
165	Water	eGFP	F16	4	219.231
166	Water	eGFP	F16	5	26.9231
167	Water	eGFP	F16	6	53.8462
170	Water	eGFP	F30	3	0
171	Water	eGFP	F30	4	-50
172	Water	eGFP	F30	5	39.4737
173	Water	eGFP	F30	6	-60.5263
176	Water	eGFP	F31	3	0
177	Water	eGFP	F31	4	43.75
178	Water	eGFP	F31	5	43.75
179	Water	eGFP	F31	6	350
182	Water	eGFP	F32	3	0
183	Water	eGFP	F32	4	-2.27273
184	Water	eGFP	F32	5	22.7273
185	Water	eGFP	F32	6	86.3636
188	Water	eGFP	F33	3	0
189	Water	eGFP	F33	4	72.7273
190	Water	eGFP	F33	5	136.364
191	Water	eGFP	F33	6	681.818
194	Water	eGFP	F34	3	0
195	Water	eGFP	F34	4	67.8571
196	Water	eGFP	F34	5	96.4286
197	Water	eGFP	F34	6	275
200	Water	eGFP	F35	3	0
201	Water	eGFP	F35	4	7.54717
202	Water	eGFP	F35	5	3.77358
203	Water	eGFP	F35	6	13.2075
206	Water	ChR2	F9	3	0
207	Water	ChR2	F9	4	-35
208	Water	ChR2	F9	5	13.75
209	Water	ChR2	F9	6	-42.5
