# Supplementary material for: The role of anterior insular cortex inputs to dorsolateral striatum in binge alcohol drinking
Source: eLife journal article supplement (doi:10.7554/elife.77411), 2022-07-28
Supplement: fig3-data1 [file Fig3G.xlsx]

## Sheet: Sheet1
	Fluid	Virus	ID	DIDWeek	Var % Change
2	Alcohol	ChR2	D1	3	0
3	Alcohol	ChR2	D1	4	-11.236
4	Alcohol	ChR2	D1	5	-43.8863
5	Alcohol	ChR2	D1	6	-12.2935
8	Alcohol	eGFP	D11	3	0
9	Alcohol	eGFP	D11	4	9.58466
10	Alcohol	eGFP	D11	5	19.5687
11	Alcohol	eGFP	D11	6	-6.07029
14	Alcohol	eGFP	D13	3	0
15	Alcohol	eGFP	D13	4	23.0715
16	Alcohol	eGFP	D13	5	55.0491
17	Alcohol	eGFP	D13	6	57.0126
20	Alcohol	ChR2	D2	3	0
21	Alcohol	ChR2	D2	4	-32.4344
22	Alcohol	ChR2	D2	5	-0.364431
23	Alcohol	ChR2	D2	6	13.2653
26	Alcohol	eGFP	D23	3	0
27	Alcohol	eGFP	D23	4	12.5623
28	Alcohol	eGFP	D23	5	35.7926
29	Alcohol	eGFP	D23	6	20.5384
32	Alcohol	eGFP	D24	3	0
33	Alcohol	eGFP	D24	4	34.7305
34	Alcohol	eGFP	D24	5	33.6078
35	Alcohol	eGFP	D24	6	33.9072
38	Alcohol	eGFP	D25	3	0
39	Alcohol	eGFP	D25	4	-32.7282
40	Alcohol	eGFP	D25	5	-36.0918
41	Alcohol	eGFP	D25	6	-21.5697
44	Alcohol	ChR2	D28	3	0
45	Alcohol	ChR2	D28	4	-33.5172
46	Alcohol	ChR2	D28	5	-36.0294
47	Alcohol	ChR2	D28	6	-29.7181
50	Alcohol	eGFP	D31	3	0
51	Alcohol	eGFP	D31	4	-9.27487
52	Alcohol	eGFP	D31	5	-6.85779
53	Alcohol	eGFP	D31	6	31.1973
56	Alcohol	ChR2	D34	3	0
57	Alcohol	ChR2	D34	4	-24.7722
58	Alcohol	ChR2	D34	5	-32.2287
59	Alcohol	ChR2	D34	6	-31.8973
62	Alcohol	ChR2	D4	3	0
63	Alcohol	ChR2	D4	4	-3.71599
64	Alcohol	ChR2	D4	5	-23.2348
65	Alcohol	ChR2	D4	6	-22.3178
68	Alcohol	ChR2	D5	3	0
69	Alcohol	ChR2	D5	4	-12.2386
70	Alcohol	ChR2	D5	5	-7.81058
71	Alcohol	ChR2	D5	6	13.2841
74	Alcohol	ChR2	D7	3	0
75	Alcohol	ChR2	D7	4	-24.7107
76	Alcohol	ChR2	D7	5	-60.3812
77	Alcohol	ChR2	D7	6	-47.6515
80	Alcohol	ChR2	D8	3	0
81	Alcohol	ChR2	D8	4	-14.7853
82	Alcohol	ChR2	D8	5	-39.4479
83	Alcohol	ChR2	D8	6	-50.9816
140	Alcohol	eGFP	E24	3	0
141	Alcohol	eGFP	E24	4	-25.979
142	Alcohol	eGFP	E24	5	-36.1032
143	Alcohol	eGFP	E24	6	13.3715
146	Alcohol	eGFP	E25	3	0
147	Alcohol	eGFP	E25	4	-23.9925
148	Alcohol	eGFP	E25	5	17.3383
149	Alcohol	eGFP	E25	6	42.3618
