# Supplementary material for: The role of anterior insular cortex inputs to dorsolateral striatum in binge alcohol drinking
Source: eLife journal article supplement (doi:10.7554/elife.77411), 2022-07-28
Supplement: fig3-data1 [file Fig3H.xlsx]

## Sheet: Sheet1
	Fluid	Virus	ID	DIDWeek	Var % Change
2	Alcohol	ChR2	D1	3	0
3	Alcohol	ChR2	D1	4	-32.3514
4	Alcohol	ChR2	D1	5	-66.8779
5	Alcohol	ChR2	D1	6	-53.194
8	Alcohol	eGFP	D11	3	0
9	Alcohol	eGFP	D11	4	-19.1749
10	Alcohol	eGFP	D11	5	-9.2076
11	Alcohol	eGFP	D11	6	-39.869
14	Alcohol	eGFP	D13	3	0
15	Alcohol	eGFP	D13	4	5.16081
16	Alcohol	eGFP	D13	5	20.1571
17	Alcohol	eGFP	D13	6	29.1698
20	Alcohol	ChR2	D2	3	0
21	Alcohol	ChR2	D2	4	-35.3292
22	Alcohol	ChR2	D2	5	23.3292
23	Alcohol	ChR2	D2	6	21.0807
26	Alcohol	eGFP	D23	3	0
27	Alcohol	eGFP	D23	4	-2.52815
28	Alcohol	eGFP	D23	5	-19.9703
29	Alcohol	eGFP	D23	6	-36.4776
32	Alcohol	eGFP	D24	3	0
33	Alcohol	eGFP	D24	4	95.9319
34	Alcohol	eGFP	D24	5	88.5683
35	Alcohol	eGFP	D24	6	45.112
38	Alcohol	eGFP	D25	3	0
39	Alcohol	eGFP	D25	4	39.7016
40	Alcohol	eGFP	D25	5	3.08509
41	Alcohol	eGFP	D25	6	-18.8014
44	Alcohol	ChR2	D28	3	0
45	Alcohol	ChR2	D28	4	-0.908501
46	Alcohol	ChR2	D28	5	-47.0149
47	Alcohol	ChR2	D28	6	-41.3043
50	Alcohol	eGFP	D31	3	0
51	Alcohol	eGFP	D31	4	-51.1654
52	Alcohol	eGFP	D31	5	-51.3348
53	Alcohol	eGFP	D31	6	-44.1165
56	Alcohol	ChR2	D34	3	0
57	Alcohol	ChR2	D34	4	-68.4788
58	Alcohol	ChR2	D34	5	-84.2143
59	Alcohol	ChR2	D34	6	-80.327
62	Alcohol	ChR2	D4	3	0
63	Alcohol	ChR2	D4	4	-35.6082
64	Alcohol	ChR2	D4	5	-67.3824
65	Alcohol	ChR2	D4	6	-62.044
68	Alcohol	ChR2	D5	3	0
69	Alcohol	ChR2	D5	4	-20.587
70	Alcohol	ChR2	D5	5	-26.2116
71	Alcohol	ChR2	D5	6	-13.2833
74	Alcohol	ChR2	D7	3	0
75	Alcohol	ChR2	D7	4	-36.7559
76	Alcohol	ChR2	D7	5	-65.7395
77	Alcohol	ChR2	D7	6	-62.8542
80	Alcohol	ChR2	D8	3	0
81	Alcohol	ChR2	D8	4	-24.0534
82	Alcohol	ChR2	D8	5	-59.9327
83	Alcohol	ChR2	D8	6	-62.2328
140	Alcohol	eGFP	E24	3	0
141	Alcohol	eGFP	E24	4	-10.0972
142	Alcohol	eGFP	E24	5	-18.8411
143	Alcohol	eGFP	E24	6	0.138793
146	Alcohol	eGFP	E25	3	0
147	Alcohol	eGFP	E25	4	-31.105
148	Alcohol	eGFP	E25	5	7.77626
149	Alcohol	eGFP	E25	6	17.7808
