# Supplementary material for: The role of anterior insular cortex inputs to dorsolateral striatum in binge alcohol drinking
Source: eLife journal article supplement (doi:10.7554/elife.77411), 2022-07-28
Supplement: fig3-data1 [file Fig3I.xlsx]

## Sheet: Sheet1
	Fluid	Virus	ID	DIDWeek	Var % Change
2	Alcohol	ChR2	D1	3	0
3	Alcohol	ChR2	D1	4	-10.5691
4	Alcohol	ChR2	D1	5	-27.6423
5	Alcohol	ChR2	D1	6	-17.8862
8	Alcohol	eGFP	D11	3	0
9	Alcohol	eGFP	D11	4	-2.23048
10	Alcohol	eGFP	D11	5	5.94796
11	Alcohol	eGFP	D11	6	-12.6394
14	Alcohol	eGFP	D13	3	0
15	Alcohol	eGFP	D13	4	28.3721
16	Alcohol	eGFP	D13	5	51.6279
17	Alcohol	eGFP	D13	6	55.3488
20	Alcohol	ChR2	D2	3	0
21	Alcohol	ChR2	D2	4	-40.9836
22	Alcohol	ChR2	D2	5	-32.7869
23	Alcohol	ChR2	D2	6	-31.9672
26	Alcohol	eGFP	D23	3	0
27	Alcohol	eGFP	D23	4	11.1111
28	Alcohol	eGFP	D23	5	31.0185
29	Alcohol	eGFP	D23	6	10.1852
32	Alcohol	eGFP	D24	3	0
33	Alcohol	eGFP	D24	4	44.206
34	Alcohol	eGFP	D24	5	60.515
35	Alcohol	eGFP	D24	6	50.6438
38	Alcohol	eGFP	D25	3	0
39	Alcohol	eGFP	D25	4	-32.304
40	Alcohol	eGFP	D25	5	-40.8551
41	Alcohol	eGFP	D25	6	-31.3539
44	Alcohol	ChR2	D28	3	0
45	Alcohol	ChR2	D28	4	-21.0682
46	Alcohol	ChR2	D28	5	-28.7834
47	Alcohol	ChR2	D28	6	-26.7062
50	Alcohol	eGFP	D31	3	0
51	Alcohol	eGFP	D31	4	-32.3276
52	Alcohol	eGFP	D31	5	-31.681
53	Alcohol	eGFP	D31	6	-21.1207
56	Alcohol	ChR2	D34	3	0
57	Alcohol	ChR2	D34	4	-46.3415
58	Alcohol	ChR2	D34	5	-58.885
59	Alcohol	ChR2	D34	6	-55.9233
62	Alcohol	ChR2	D4	3	0
63	Alcohol	ChR2	D4	4	-46.4481
64	Alcohol	ChR2	D4	5	-59.5628
65	Alcohol	ChR2	D4	6	-60.6557
68	Alcohol	ChR2	D5	3	0
69	Alcohol	ChR2	D5	4	-5.76923
70	Alcohol	ChR2	D5	5	-27.5641
71	Alcohol	ChR2	D5	6	-21.1538
74	Alcohol	ChR2	D7	3	0
75	Alcohol	ChR2	D7	4	-13.8889
76	Alcohol	ChR2	D7	5	-44.4444
77	Alcohol	ChR2	D7	6	-31.4815
80	Alcohol	ChR2	D8	3	0
81	Alcohol	ChR2	D8	4	-19.0323
82	Alcohol	ChR2	D8	5	-46.4516
83	Alcohol	ChR2	D8	6	-45.4839
140	Alcohol	eGFP	E24	3	0
141	Alcohol	eGFP	E24	4	-12.426
142	Alcohol	eGFP	E24	5	-26.6272
143	Alcohol	eGFP	E24	6	29.5858
146	Alcohol	eGFP	E25	3	0
147	Alcohol	eGFP	E25	4	-22.7907
148	Alcohol	eGFP	E25	5	13.9535
149	Alcohol	eGFP	E25	6	25.1163
