# Supplementary material for: The role of anterior insular cortex inputs to dorsolateral striatum in binge alcohol drinking
Source: eLife journal article supplement (doi:10.7554/elife.77411), 2022-07-28
Supplement: fig3-data1 [file Fig3J.xlsx]

## Sheet: Sheet1
	Fluid	Virus	ID	DIDWeek	Var % Change
2	Alcohol	ChR2	D1	3	0
3	Alcohol	ChR2	D1	4	13.3721
4	Alcohol	ChR2	D1	5	21.4147
5	Alcohol	ChR2	D1	6	30.3295
8	Alcohol	eGFP	D11	3	0
9	Alcohol	eGFP	D11	4	103.279
10	Alcohol	eGFP	D11	5	178.142
11	Alcohol	eGFP	D11	6	350.82
14	Alcohol	eGFP	D13	3	0
15	Alcohol	eGFP	D13	4	-65.4991
16	Alcohol	eGFP	D13	5	-77.2436
17	Alcohol	eGFP	D13	6	-69.1621
20	Alcohol	ChR2	D2	3	0
21	Alcohol	ChR2	D2	4	106.211
22	Alcohol	ChR2	D2	5	68.2665
23	Alcohol	ChR2	D2	6	156.522
26	Alcohol	eGFP	D23	3	0
27	Alcohol	eGFP	D23	4	-20.8
28	Alcohol	eGFP	D23	5	-49.2333
29	Alcohol	eGFP	D23	6	-40.3833
32	Alcohol	eGFP	D24	3	0
33	Alcohol	eGFP	D24	4	-38.5956
34	Alcohol	eGFP	D24	5	-60.1594
35	Alcohol	eGFP	D24	6	-50.2988
38	Alcohol	eGFP	D25	3	0
39	Alcohol	eGFP	D25	4	-33.4507
40	Alcohol	eGFP	D25	5	-30.2817
41	Alcohol	eGFP	D25	6	-14.4366
44	Alcohol	ChR2	D28	3	0
45	Alcohol	ChR2	D28	4	10.245
46	Alcohol	ChR2	D28	5	-17.5947
47	Alcohol	ChR2	D28	6	-14.4766
50	Alcohol	eGFP	D31	3	0
51	Alcohol	eGFP	D31	4	107.798
52	Alcohol	eGFP	D31	5	100.917
53	Alcohol	eGFP	D31	6	82.5688
56	Alcohol	ChR2	D34	3	0
57	Alcohol	ChR2	D34	4	-57.6662
58	Alcohol	ChR2	D34	5	-66.3501
59	Alcohol	ChR2	D34	6	-42.7408
62	Alcohol	ChR2	D4	3	0
63	Alcohol	ChR2	D4	4	100
64	Alcohol	ChR2	D4	5	165.625
65	Alcohol	ChR2	D4	6	520.312
68	Alcohol	ChR2	D5	3	0
69	Alcohol	ChR2	D5	4	-12.9032
70	Alcohol	ChR2	D5	5	29.0323
71	Alcohol	ChR2	D5	6	85.4839
74	Alcohol	ChR2	D7	3	0
75	Alcohol	ChR2	D7	4	-39.7117
76	Alcohol	ChR2	D7	5	146.396
77	Alcohol	ChR2	D7	6	181.127
80	Alcohol	ChR2	D8	3	0
81	Alcohol	ChR2	D8	4	-53.1136
82	Alcohol	ChR2	D8	5	-31.1355
83	Alcohol	ChR2	D8	6	54.9451
140	Alcohol	eGFP	E24	3	0
141	Alcohol	eGFP	E24	4	-23.3888
142	Alcohol	eGFP	E24	5	356.133
143	Alcohol	eGFP	E24	6	-28.4823
146	Alcohol	eGFP	E25	3	0
147	Alcohol	eGFP	E25	4	517.373
148	Alcohol	eGFP	E25	5	31.3559
149	Alcohol	eGFP	E25	6	10.1695
