# Supplementary material for: The role of anterior insular cortex inputs to dorsolateral striatum in binge alcohol drinking
Source: eLife journal article supplement (doi:10.7554/elife.77411), 2022-07-28
Supplement: fig3-data1 [file Fig3K.xlsx]

## Sheet: Sheet1
	Fluid	Virus	ID	DIDWeek	Var % Change
2	Alcohol	ChR2	D1	3	0
3	Alcohol	ChR2	D1	4	33.5084
4	Alcohol	ChR2	D1	5	5.14706
5	Alcohol	ChR2	D1	6	31.7227
8	Alcohol	eGFP	D11	3	0
9	Alcohol	eGFP	D11	4	156.444
10	Alcohol	eGFP	D11	5	42.6667
11	Alcohol	eGFP	D11	6	69.7778
14	Alcohol	eGFP	D13	3	0
15	Alcohol	eGFP	D13	4	-13.3234
16	Alcohol	eGFP	D13	5	-28.4431
17	Alcohol	eGFP	D13	6	-17.515
20	Alcohol	ChR2	D2	3	0
21	Alcohol	ChR2	D2	4	-10.9476
22	Alcohol	ChR2	D2	5	-31.0641
23	Alcohol	ChR2	D2	6	-28.6415
26	Alcohol	eGFP	D23	3	0
27	Alcohol	eGFP	D23	4	-17.0354
28	Alcohol	eGFP	D23	5	-31.0841
29	Alcohol	eGFP	D23	6	-22.1239
32	Alcohol	eGFP	D24	3	0
33	Alcohol	eGFP	D24	4	-11.2245
34	Alcohol	eGFP	D24	5	-13.5569
35	Alcohol	eGFP	D24	6	-20.5539
38	Alcohol	eGFP	D25	3	0
39	Alcohol	eGFP	D25	4	43.6652
40	Alcohol	eGFP	D25	5	14.7059
41	Alcohol	eGFP	D25	6	0
44	Alcohol	ChR2	D28	3	0
45	Alcohol	ChR2	D28	4	13.9262
46	Alcohol	ChR2	D28	5	11.0738
47	Alcohol	ChR2	D28	6	30.5369
50	Alcohol	eGFP	D31	3	0
51	Alcohol	eGFP	D31	4	46.1538
52	Alcohol	eGFP	D31	5	39.7878
53	Alcohol	eGFP	D31	6	37.6658
56	Alcohol	ChR2	D34	3	0
57	Alcohol	ChR2	D34	4	40.9722
58	Alcohol	ChR2	D34	5	40.9722
59	Alcohol	ChR2	D34	6	36.5741
62	Alcohol	ChR2	D4	3	0
63	Alcohol	ChR2	D4	4	59.4801
64	Alcohol	ChR2	D4	5	85.3976
65	Alcohol	ChR2	D4	6	81.0398
68	Alcohol	ChR2	D5	3	0
69	Alcohol	ChR2	D5	4	-11.2865
70	Alcohol	ChR2	D5	5	40.6472
71	Alcohol	ChR2	D5	6	23.4412
74	Alcohol	ChR2	D7	3	0
75	Alcohol	ChR2	D7	4	52.1095
76	Alcohol	ChR2	D7	5	-23.8342
77	Alcohol	ChR2	D7	6	-33.9008
80	Alcohol	ChR2	D8	3	0
81	Alcohol	ChR2	D8	4	22.0096
82	Alcohol	ChR2	D8	5	26.7943
83	Alcohol	ChR2	D8	6	84.051
140	Alcohol	eGFP	E24	3	0
141	Alcohol	eGFP	E24	4	25.0642
142	Alcohol	eGFP	E24	5	66.8092
143	Alcohol	eGFP	E24	6	-38.3234
146	Alcohol	eGFP	E25	3	0
147	Alcohol	eGFP	E25	4	-4.90082
148	Alcohol	eGFP	E25	5	-10.8518
149	Alcohol	eGFP	E25	6	-18.6698
