# Supplementary material for: The role of anterior insular cortex inputs to dorsolateral striatum in binge alcohol drinking
Source: eLife journal article supplement (doi:10.7554/elife.77411), 2022-07-28
Supplement: fig3-data1 [file Fig3L.xlsx]

## Sheet: Sheet1
	Fluid	Virus	ID	DIDWeek	Var % Change
2	Alcohol	ChR2	D1	3	0
3	Alcohol	ChR2	D1	4	-62.1622
4	Alcohol	ChR2	D1	5	-97.2973
5	Alcohol	ChR2	D1	6	-94.5946
8	Alcohol	eGFP	D11	3	0
9	Alcohol	eGFP	D11	4	-1.0989
10	Alcohol	eGFP	D11	5	1.0989
11	Alcohol	eGFP	D11	6	-9.89011
14	Alcohol	eGFP	D13	3	0
15	Alcohol	eGFP	D13	4	-9.58904
16	Alcohol	eGFP	D13	5	42.4658
17	Alcohol	eGFP	D13	6	43.8356
20	Alcohol	ChR2	D2	3	0
21	Alcohol	ChR2	D2	4	-56.6667
22	Alcohol	ChR2	D2	5	-23.3333
23	Alcohol	ChR2	D2	6	-50
26	Alcohol	eGFP	D23	3	0
27	Alcohol	eGFP	D23	4	83.3333
28	Alcohol	eGFP	D23	5	288.889
29	Alcohol	eGFP	D23	6	111.111
32	Alcohol	eGFP	D24	3	0
33	Alcohol	eGFP	D24	4	20.6897
34	Alcohol	eGFP	D24	5	100
35	Alcohol	eGFP	D24	6	86.2069
38	Alcohol	eGFP	D25	3	0
39	Alcohol	eGFP	D25	4	-28.7671
40	Alcohol	eGFP	D25	5	-15.7534
41	Alcohol	eGFP	D25	6	-15.7534
44	Alcohol	ChR2	D28	3	0
45	Alcohol	ChR2	D28	4	-34.9398
46	Alcohol	ChR2	D28	5	2.40964
47	Alcohol	ChR2	D28	6	-8.43373
50	Alcohol	eGFP	D31	3	0
51	Alcohol	eGFP	D31	4	-55.8824
52	Alcohol	eGFP	D31	5	-13.5294
53	Alcohol	eGFP	D31	6	-31.1765
56	Alcohol	ChR2	D34	3	0
57	Alcohol	ChR2	D34	4	-50.7853
58	Alcohol	ChR2	D34	5	-18.8482
59	Alcohol	ChR2	D34	6	-32.4607
62	Alcohol	ChR2	D4	3	0
63	Alcohol	ChR2	D4	4	-22.5
64	Alcohol	ChR2	D4	5	-32.5
65	Alcohol	ChR2	D4	6	-72.5
68	Alcohol	ChR2	D5	3	0
69	Alcohol	ChR2	D5	4	3.27869
70	Alcohol	ChR2	D5	5	-24.5902
71	Alcohol	ChR2	D5	6	-26.2295
74	Alcohol	ChR2	D7	3	0
75	Alcohol	ChR2	D7	4	-52
76	Alcohol	ChR2	D7	5	-76
77	Alcohol	ChR2	D7	6	-96
80	Alcohol	ChR2	D8	3	0
81	Alcohol	ChR2	D8	4	-1.42857
82	Alcohol	ChR2	D8	5	-32.8571
83	Alcohol	ChR2	D8	6	-41.4286
140	Alcohol	eGFP	E24	3	0
141	Alcohol	eGFP	E24	4	-61.1111
142	Alcohol	eGFP	E24	5	-78.8889
143	Alcohol	eGFP	E24	6	-26.6667
146	Alcohol	eGFP	E25	3	0
147	Alcohol	eGFP	E25	4	-60.8696
148	Alcohol	eGFP	E25	5	-30.4348
149	Alcohol	eGFP	E25	6	-16.3043
