# Supplementary material for: The role of anterior insular cortex inputs to dorsolateral striatum in binge alcohol drinking
Source: eLife journal article supplement (doi:10.7554/elife.77411), 2022-07-28
Supplement: fig3-data1 [file Fig3M.xlsx]

## Sheet: Sheet1
	ID	Device	Date	Fluid	ProbeSide	StimState	Session	Virus	Yoked	SessionLenght	BottleSide	Weight	Intake	Cohort	DIDWeek	Total Alcohol Licks	Total Alcohol Lick Duration (s)	Number of Drinks	Mean Alcohol Licks per Drink	Mean Alcohol Lick Duration per Drink (s)	Max Alcohol Lick Duration per Session (s)	Latency to Drink (s)	Mean Inter Drink Interval (s)	Total Alcohol Licks in First 30 Minutes	Total Alcohol Lick Duration in First 30 Minutes (s)	Number of Drinks in First 30 Minutes	Mean Alcohol Licks per Drink in First 30 Minutes	Mean Alcohol Lick Duration per Drink in First 30 Minutes (s)	Max Alcohol Lick Duration per Drink in First 30 Minutes (s)
0	D1	1	2019-11-04	Alcohol	Left	Light OFF	1	ChR2	Yoked	2	Left	22.6	0	1	1	0	0	0	0	0	0	7200		0	0	0	0	0	0
1	D2	2	2019-11-04	Alcohol	Right	Light OFF	1	ChR2	Paired	2	Left	24.8	1.96112	1	1	171	26.76	36	4.75	0.731389	3.7	590	187	17	2.36	4	4.25	0.59	1.18
3	D4	4	2019-11-04	Alcohol	Right	Light OFF	1	ChR2	Paired	2	Left	23.6	0	1	1	0	0	0	0	0	0	7200		0	0	0	0	0	0
4	D5	5	2019-11-04	Alcohol	Left	Light OFF	1	ChR2	Paired	2	Left	21.1	3.07334	1	1	461	43.83	57	8.08772	0.761228	4.72	980	59	41	6.2	5	8.2	1.24	3.2
5	D7	6	2019-11-04	Alcohol	Right	Light OFF	1	ChR2	Yoked	2	Left	20	0	1	1	0	0	0	0	0	0	7200		0	0	0	0	0	0
6	D1	1	2019-11-05	Alcohol	Left	Light OFF	2	ChR2	Yoked	2	Left	22.6	0	1	1	0	0	0	0	0	0	7200		0	0	0	0	0	0
7	D2	2	2019-11-05	Alcohol	Right	Light OFF	2	ChR2	Paired	2	Left	24.8	1.96112	1	1	335	48.37	57	5.87719	0.843684	3.47	250	122	92	18.97	19	4.84211	0.998421	3.47
9	D4	4	2019-11-05	Alcohol	Right	Light OFF	2	ChR2	Paired	2	Left	23.6	0	1	1	0	0	0	0	0	0	7200		0	0	0	0	0	0
10	D5	5	2019-11-05	Alcohol	Left	Light OFF	2	ChR2	Paired	2	Left	21.1	1.53667	1	1	217	31.94	26	8.34615	1.21423	5.4	170	172	22	3.31	4	5.5	0.8275	2.68
11	D7	6	2019-11-05	Alcohol	Right	Light OFF	2	ChR2	Yoked	2	Left	20	4.05297	1	1	666	142.86	85	7.83529	1.68071	4.84	240	71	34	5.94	5	6.8	1.188	2.52
12	D1	1	2019-11-06	Alcohol	Left	Light OFF	3	ChR2	Yoked	2	Left	22.8	0	1	1	0	0	0	0	0	0	7200		0	0	0	0	0	0
13	D2	2	2019-11-06	Alcohol	Right	Light OFF	3	ChR2	Paired	2	Left	24.3	2.66862	1	1	212	22.47	19	11.1579	1.18211	3.96	400	282	3	0.38	2	1.5	0.19	0.29
15	D4	4	2019-11-06	Alcohol	Right	Light OFF	3	ChR2	Paired	2	Left	23.1	0	1	1	0	0	0	0	0	0	7200		0	0	0	0	0	0
16	D5	5	2019-11-06	Alcohol	Left	Light OFF	3	ChR2	Paired	2	Left	21.1	2.30501	1	1	456	78.58	60	7.6	1.30767	4.21	70	113	111	18.59	21	5.28571	0.885238	2.51
17	D7	6	2019-11-06	Alcohol	Right	Light OFF	3	ChR2	Yoked	2	Left	21.2	3.82356	1	1	625	81.08	88	7.10227	0.919773	4.08	40	69	199	23.33	26	7.65385	0.897308	4.08
18	D1	1	2019-11-07	Alcohol	Left	Light OFF	4	ChR2	Yoked	2	Left	22.8	2.13314	1	1	372	22.46	46	8.08696	0.488043	2.68	580	131	53	2.91	12	4.41667	0.2425	1.22
19	D2	2	2019-11-07	Alcohol	Right	Light OFF	4	ChR2	Paired	2	Left	24.3	2.66862	1	1	209	20.08	18	11.6111	1.11444	3.95	340	372	7	2.53	3	2.33333	0.843333	2.49
21	D4	4	2019-11-07	Alcohol	Right	Light OFF	4	ChR2	Paired	2	Left	23.1	0	1	1	0	0	0	0	0	0	7200		0	0	0	0	0	0
22	D5	5	2019-11-07	Alcohol	Left	Light OFF	4	ChR2	Paired	2	Left	21.1	3.84168	1	1	615	54.86	62	9.91935	0.884839	2.99	90	116	217	20.95	22	9.86364	0.952273	2.99
23	D7	6	2019-11-07	Alcohol	Right	Light OFF	4	ChR2	Yoked	2	Left	21.2	5.35298	1	1	869	72.6	82	10.5976	0.885366	3.46	40	88	262	23.65	41	6.39024	0.576829	3.46
24	D1	1	2019-11-08	Alcohol	Left	Light OFF	5	ChR2	Yoked	4	Left	22.1	2.93428	1	1	279	12.75	32	8.71875	0.396875	1.49	2160	185	0	0	0	0	0	0
25	D2	2	2019-11-08	Alcohol	Right	Light OFF	5	ChR2	Paired	4	Left	24.7	7.21987	1	1	829	94.25	63	13.1587	1.49413	5.05	960	188	4	1.5	1	4	1.5	1.5
27	D4	4	2019-11-08	Alcohol	Right	Light OFF	5	ChR2	Paired	4	Left	21.8	0.743664	1	1	3	0.3	2	1.5	0.15	0.19	12590	20	0	0	0	0	0	0
28	D5	5	2019-11-08	Alcohol	Left	Light OFF	5	ChR2	Paired	4	Left	20.7	3.13273	1	1	404	30.44	41	9.85366	0.738537	2.93	310	221	81	11.33	12	6.75	0.944167	2.92
29	D7	6	2019-11-08	Alcohol	Right	Light OFF	5	ChR2	Yoked	4	Left	20.9	5.42982	1	1	415	26.39	35	11.8571	0.754	2.8	180	417	364	23.2	30	12.1333	0.773333	2.8
30	D1	1	2019-11-11	Alcohol	Left	Light OFF	6	ChR2	Yoked	2	Left	22.9	2.12383	1	2	191	12.91	16	11.9375	0.806875	3.09	1150	359	31	4.56	3	10.3333	1.52	3.09
31	D2	2	2019-11-11	Alcohol	Right	Light OFF	6	ChR2	Paired	2	Left	24.2	1.33983	1	2	35	7.01	8	4.375	0.8675	2.57	820	734	2	0.27	2	1	0.135	0.16
33	D4	4	2019-11-11	Alcohol	Right	Light OFF	6	ChR2	Paired	2	Left	22.2	0.730265	1	2	12	1.04	3	4	0.346667	0.38	190	2105	9	0.76	2	4.5	0.38	0.38
34	D5	5	2019-11-11	Alcohol	Left	Light OFF	6	ChR2	Paired	2	Left	22	2.21071	1	2	272	15.97	34	8	0.469706	2.31	250	208	9	0.92	4	2.25	0.23	0.38
35	D7	6	2019-11-11	Alcohol	Right	Light OFF	6	ChR2	Yoked	2	Left	21.8	2.97466	1	2	254	18.9	29	8.75862	0.651724	2.84	230	192	8	0.41	2	4	0.205	0.29
36	D1	1	2019-11-12	Alcohol	Left	Light OFF	7	ChR2	Yoked	2	Left	22.9	2.83177	1	2	322	23.47	24	13.4167	0.973333	2.19	2620	157	0	0	0	0	0	0
37	D2	2	2019-11-12	Alcohol	Right	Light OFF	7	ChR2	Paired	2	Left	24.2	1.33983	1	2	61	4.25	10	6.1	0.424	1.66	2774	383	0	0	0	0	0	0
39	D4	4	2019-11-12	Alcohol	Right	Light OFF	7	ChR2	Paired	2	Left	22.2	0.730265	1	2	1	0.03	1	1	0	0	1251		1	0	1	1	0	0
40	D5	5	2019-11-12	Alcohol	Left	Light OFF	7	ChR2	Paired	2	Left	22	2.94762	1	2	208	9.42	20	10.4	0.471	1.93	330	252	1	0.01	1	1	0.01	0.01
41	D7	6	2019-11-12	Alcohol	Right	Light OFF	7	ChR2	Yoked	2	Left	21.8	2.97466	1	2	165	9.76	21	7.85714	0.456667	1.58	350	172	42	3.47	8	5.25	0.43375	1.58
42	D1	1	2019-11-13	Alcohol	Left	Light OFF	8	ChR2	Yoked	2	Left	23.3	3.47895	1	2	365	34.09	42	8.69048	0.805714	2.95	450	110	59	6.57	7	8.42857	0.938571	2.21
43	D2	2	2019-11-13	Alcohol	Right	Light OFF	8	ChR2	Paired	2	Left	24.8	2.61482	1	2	173	11.49	15	11.5333	0.760667	2.38	2455	272	0	0	0	0	0	0
45	D4	4	2019-11-13	Alcohol	Right	Light OFF	8	ChR2	Paired	2	Left	23.5	4.1392	1	2	268	22.05	50	5.36	0.441	1.76	400	136	30	5.07	7	4.28571	0.724286	1.76
46	D5	5	2019-11-13	Alcohol	Left	Light OFF	8	ChR2	Paired	2	Left	22.1	3.66785	1	2	289	13.69	23	12.5652	0.594783	1.82	80	320	61	3.44	6	10.1667	0.573333	1.35
47	D7	6	2019-11-13	Alcohol	Right	Light OFF	8	ChR2	Yoked	2	Left	22.9	7.07943	1	2	529	25.11	40	13.225	0.62775	2.2	50	167	157	7.31	15	10.4667	0.487333	1.28
48	D1	1	2019-11-14	Alcohol	Left	Light OFF	9	ChR2	Yoked	2	Left	23.3	2.78316	1	2	289	15.68	31	9.32258	0.488387	1.32	630	213	140	8.9	14	10	0.635714	1.32
49	D2	2	2019-11-14	Alcohol	Right	Light OFF	9	ChR2	Paired	2	Left	24.8	1.96112	1	2	186	23.38	17	10.9412	1.37529	5.57	50	438	48	5.23	6	8	0.871667	2.5
51	D4	4	2019-11-14	Alcohol	Right	Light OFF	9	ChR2	Paired	2	Left	23.5	3.44934	1	2	621	87.45	90	6.9	0.971667	4.04	150	55	111	13.46	29	3.82759	0.464138	1.52
52	D5	5	2019-11-14	Alcohol	Left	Light OFF	9	ChR2	Paired	2	Left	22.1	3.66785	1	2	293	16.99	36	8.13889	0.471667	2.86	40	182	87	7.25	12	7.25	0.604167	2.86
53	D7	6	2019-11-14	Alcohol	Right	Light OFF	9	ChR2	Yoked	2	Left	22.9	6.37148	1	2	315	11.23	25	12.6	0.4492	1.25	180	292	38	1.66	6	6.33333	0.276667	0.56
54	D1	1	2019-11-15	Alcohol	Left	Light OFF	10	ChR2	Yoked	4	Left	23.9	4.06993	1	2	435	29.35	67	6.49254	0.43806	1.21	210	122	79	4.33	15	5.26667	0.288667	0.97
55	D2	2	2019-11-15	Alcohol	Right	Light OFF	10	ChR2	Paired	4	Left	25.3	3.20393	1	2	321	20.81	23	13.9565	0.857391	3.69	230	542	77	5.4	4	19.25	1.35	3.49
57	D4	4	2019-11-15	Alcohol	Right	Light OFF	10	ChR2	Paired	4	Left	24	2.70198	1	2	307	20.14	31	9.90323	0.648387	2.64	1370	387	25	1.3	3	8.33333	0.433333	1.04
58	D5	5	2019-11-15	Alcohol	Left	Light OFF	10	ChR2	Paired	4	Left	22.2	5.11186	1	2	494	24.08	62	7.96774	0.385	1.7	70	215	67	1.63	6	11.1667	0.271667	0.42
59	D7	6	2019-11-15	Alcohol	Right	Light OFF	10	ChR2	Yoked	4	Left	22.7	7.1418	1	2	488	16.54	31	15.7419	0.529677	1.72	100	380	82	2.53	6	13.6667	0.421667	1.18
60	D1	1	2019-11-18	Alcohol	Left	Light OFF	11	ChR2	Yoked	2	Left	23.5	2.0696	1	3	222	6.94	28	7.92857	0.247857	1.15	310	245	153	4.51	20	7.65	0.2255	1.15
61	D2	2	2019-11-18	Alcohol	Right	Light OFF	11	ChR2	Paired	2	Left	25.4	3.19132	1	3	259	19.83	19	13.6316	1.04368	4.14	450	317	45	3.63	5	9	0.726	2.07
63	D4	4	2019-11-18	Alcohol	Right	Light OFF	11	ChR2	Paired	2	Left	23.9	3.39161	1	3	215	15.47	28	7.67857	0.5525	2.33	50	188	71	7.89	12	5.91667	0.6575	2.33
64	D5	5	2019-11-18	Alcohol	Left	Light OFF	11	ChR2	Paired	2	Left	22.4	3.61872	1	3	299	13.81	33	9.06061	0.399091	2.06	80	219	140	6.72	14	10	0.48	2.06
65	D7	6	2019-11-18	Alcohol	Right	Light OFF	11	ChR2	Yoked	2	Left	23	4.22919	1	3	225	7.13	16	14.0625	0.445625	2.66	220	360	65	1.32	6	10.8333	0.22	0.5
66	D1	1	2019-11-19	Alcohol	Left	Light OFF	12	ChR2	Yoked	2	Left	23.5	2.75947	1	3	340	9.86	21	16.1905	0.422857	0.95	1130	187	14	0.85	1	14	0.85	0.85
67	D2	2	2019-11-19	Alcohol	Right	Light OFF	12	ChR2	Paired	2	Left	25.4	4.46784	1	3	365	21.73	28	13.0357	0.775714	3.31	140	257	153	10.38	11	13.9091	0.943636	3.31
69	D4	4	2019-11-19	Alcohol	Right	Light OFF	12	ChR2	Paired	2	Left	23.9	4.74825	1	3	574.1	25.981	85	6.75412	0.305659	1.88	90	59	105	4.69	10	10.5	0.469	1.04
70	D5	5	2019-11-19	Alcohol	Left	Light OFF	12	ChR2	Paired	2	Left	22.4	3.61872	1	3	317	15.12	32	9.90625	0.4725	1.68	100	183	137	7.11	13	10.5385	0.546923	1.68
71	D7	6	2019-11-19	Alcohol	Right	Light OFF	12	ChR2	Yoked	2	Left	23	4.93405	1	3	255	7.3	24	10.625	0.304167	2.18	510	282	63	1.6	7	9	0.228571	0.91
72	D1	1	2019-11-20	Alcohol	Left	Light OFF	13	ChR2	Yoked	2	Left	24.2	4.01948	1	3	365	11.57	27	13.5185	0.428148	1.09	480	182	62	2.27	8	7.75	0.28375	0.61
73	D2	2	2019-11-20	Alcohol	Right	Light OFF	13	ChR2	Paired	2	Left	25.8	4.39857	1	3	302	13.13	37	8.16216	0.354865	1.79	321	190	50	3.42	7	7.14286	0.488571	1.16
75	D4	4	2019-11-20	Alcohol	Right	Light OFF	13	ChR2	Paired	2	Left	24.8	5.22964	1	3	381	11.99	22	17.3182	0.544545	1.55	240	285	73	1.35	5	14.6	0.27	0.4
76	D5	5	2019-11-20	Alcohol	Left	Light OFF	13	ChR2	Paired	2	Left	22.8	2.84419	1	3	264	14.43	24	11	0.585833	2.28	120	266	140	8	12	11.6667	0.666667	2.28
77	D7	6	2019-11-20	Alcohol	Right	Light OFF	13	ChR2	Yoked	2	Left	23	3.52432	1	3	218	5.77	20	10.9	0.288	0.8	860	208	71	1.96	5	14.2	0.392	0.72
78	D1	1	2019-11-21	Alcohol	Left	Light OFF	14	ChR2	Yoked	2	Left	24.2	2.67965	1	3	359	21.58	31	11.5806	0.695161	2.73	950	87	103	3.71	8	12.875	0.46375	1.44
79	D2	2	2019-11-21	Alcohol	Right	Light OFF	14	ChR2	Paired	2	Left	25.8	3.14184	1	3	404	23.5	31	13.0323	0.756452	2.37	500	202	26	2.78	6	4.33333	0.463333	1.26
81	D4	4	2019-11-21	Alcohol	Right	Light OFF	14	ChR2	Paired	2	Left	24.8	4.57594	1	3	546	18.37	25	21.84	0.7348	2.06	40	259	99	3.64	8	12.375	0.455	1.18
82	D5	5	2019-11-21	Alcohol	Left	Light OFF	14	ChR2	Paired	2	Left	22.8	4.26629	1	3	363	15.09	33	11	0.457273	1.45	50	219	118	6.12	12	9.83333	0.51	1.35
83	D7	6	2019-11-21	Alcohol	Right	Light OFF	14	ChR2	Yoked	2	Left	23	6.34378	1	3	428	8.29	21	20.381	0.394762	1.05	780	228	100	1.78	7	14.2857	0.254286	0.81
84	D1	1	2019-11-22	Alcohol	Left	Light OFF	15	ChR2	Yoked	4	Left	23.6	2.06083	1	3	227	8.44	16	14.1875	0.5275	1.26	7450	251	0	0	0	0	0	0
85	D2	2	2019-11-22	Alcohol	Right	Light OFF	15	ChR2	Paired	4	Left	25.3	0.640786	1	3	42	2.31	7	6	0.328571	0.91	360	2295	1	0.21	1	1	0.21	0.21
87	D4	4	2019-11-22	Alcohol	Right	Light OFF	15	ChR2	Paired	4	Left	24.9	5.20864	1	3	574	21.85	23	24.9565	0.95	2.27	220	517	76	3.93	5	15.2	0.786	1.55
88	D5	5	2019-11-22	Alcohol	Left	Light OFF	15	ChR2	Paired	4	Left	22.5	5.0437	1	3	383	14.8	34	11.2647	0.434412	2.39	270	380	70	2.58	10	7	0.258	1.34
89	D7	6	2019-11-22	Alcohol	Right	Light OFF	15	ChR2	Yoked	4	Left	23.3	4.87052	1	3	343	9.98	27	12.7037	0.361111	1.88	5260	273	0	0	0	0	0	0
90	D1	1	2019-11-25	Alcohol	Left	Light ON	16	ChR2	Yoked	2	Left	24.4	1.32884	1	4	110	2.62	10	11	0.262	1.11	3420	337	0	0	0	0	0	0
91	D2	2	2019-11-25	Alcohol	Right	Light ON	16	ChR2	Paired	2	Left	26.6	1.21894	1	4	82	2.81	6	13.6667	0.468333	1.49	80	1020	2	0.03	2	1	0.015	0.02
93	D4	4	2019-11-25	Alcohol	Right	Light ON	16	ChR2	Paired	2	Left	25.2	4.5033	1	4	511	24.98	23	22.2174	1.08609	2.98	150	285	124	5.38	7	17.7143	0.768571	1.99
94	D5	5	2019-11-25	Alcohol	Left	Light ON	16	ChR2	Paired	2	Left	22.9	2.12383	1	4	293	10.89	34	8.61765	0.319706	1.6	60	129	132	4.83	18	7.33333	0.268333	1.6
95	D7	6	2019-11-25	Alcohol	Right	Light ON	16	ChR2	Yoked	2	Left	23.5	3.44934	1	4	131	2.29	19	6.89474	0.120526	0.54	300	375	18	0.2	6	3	0.0333333	0.12
96	D1	1	2019-11-26	Alcohol	Left	Light ON	17	ChR2	Yoked	2	Left	24.4	2.65769	1	4	229	5.95	12	19.0833	0.495833	0.99	4190	164	0	0	0	0	0	0
97	D2	2	2019-11-26	Alcohol	Right	Light ON	17	ChR2	Paired	2	Left	26.6	1.21894	1	4	105	5.25	10	10.5	0.525	1.82	1210	534	1	0.08	1	1	0.08	0.08
99	D4	4	2019-11-26	Alcohol	Right	Light ON	17	ChR2	Paired	2	Left	25.2	2.57332	1	4	354	6.98	15	23.6	0.465333	0.89	350	444	27	1.08	2	13.5	0.54	0.58
100	D5	5	2019-11-26	Alcohol	Left	Light ON	17	ChR2	Paired	2	Left	22.9	2.83177	1	4	268	9.5	23	11.6522	0.413043	1.56	70	297	135	4.63	12	11.25	0.385833	1.37
101	D7	6	2019-11-26	Alcohol	Right	Light ON	17	ChR2	Yoked	2	Left	23.5	3.44934	1	4	259	6.37	14	18.5	0.455	1.04	380	500	2	0.11	2	1	0.055	0.09
102	D1	1	2019-11-27	Alcohol	Left	Light ON	18	ChR2	Yoked	2	Left	24.7	3.93811	1	4	347	12.66	34	10.2059	0.372353	0.94	230	211	136	4.22	13	10.4615	0.324615	0.82
103	D2	2	2019-11-27	Alcohol	Right	Light ON	18	ChR2	Paired	2	Left	27	1.80132	1	4	182	12.4	15	12.1333	0.826667	2.86	442	364	19	4.04	2	9.5	2.02	2.86
105	D4	4	2019-11-27	Alcohol	Right	Light ON	18	ChR2	Paired	2	Left	25.4	3.82958	1	4	360	8.93	20	18	0.4465	1.62	410	351	92	2.55	6	15.3333	0.425	1.17
106	D5	5	2019-11-27	Alcohol	Left	Light ON	18	ChR2	Paired	2	Left	23.7	2.73618	1	4	302	13.48	34	8.88235	0.393529	1.44	170	209	92	3.75	10	9.2	0.375	0.75
107	D7	6	2019-11-27	Alcohol	Right	Light ON	18	ChR2	Yoked	2	Left	23.9	3.39161	1	4	128	2.63	12	10.6667	0.219167	0.43	1730	480	21	0.54	2	10.5	0.27	0.43
108	D1	1	2019-11-28	Alcohol	Left	Light ON	19	ChR2	Yoked	2	Left	24.7	1.96905	1	4	227	6.07	21	10.8095	0.288571	0.96	1480	239	1	0.16	1	1	0.16	0.16
109	D2	2	2019-11-28	Alcohol	Right	Light ON	19	ChR2	Paired	2	Left	27	2.40176	1	4	205	8.06	11	18.6364	0.732727	1.77	1440	566	25	1.74	2	12.5	0.87	1.06
111	D4	4	2019-11-28	Alcohol	Right	Light ON	19	ChR2	Paired	2	Left	25.4	3.19132	1	4	505	11.02	20	25.25	0.551	1.48	170	291	114	2.36	8	14.25	0.295	0.93
112	D5	5	2019-11-28	Alcohol	Left	Light ON	19	ChR2	Paired	2	Left	23.7	2.73618	1	4	196	8.24	18	10.8889	0.457778	1.38	130	230	82	3.99	9	9.11111	0.443333	1.34
113	D7	6	2019-11-28	Alcohol	Right	Light ON	19	ChR2	Yoked	2	Left	23.9	4.74825	1	4	264	5.75	18	14.6667	0.319444	0.93	140	390	2	0.01	2	1	0.005	0.01
114	D1	1	2019-11-29	Alcohol	Left	Light ON	20	ChR2	Yoked	4	Left	25	5.83628	1	4	430	12.2	33	13.0303	0.369091	1.27	2380	320	0	0	0	0	0	0
115	D2	2	2019-11-29	Alcohol	Right	Light ON	20	ChR2	Paired	4	Left	26.9	4.21871	1	4	353	23.54	30	11.7667	0.784667	3.52	480	420	39	2.13	6	6.5	0.355	1.25
117	D4	4	2019-11-29	Alcohol	Right	Light ON	20	ChR2	Paired	4	Left	24.9	3.90648	1	4	475	8.4	20	23.75	0.4195	1.15	200	715	163	2.54	8	20.375	0.3175	0.84
118	D5	5	2019-11-29	Alcohol	Left	Light ON	20	ChR2	Paired	4	Left	23.1	4.21088	1	4	368	16.06	38	9.68421	0.420526	2.03	110	259	119	3.67	14	8.5	0.262143	1.39
119	D7	6	2019-11-29	Alcohol	Right	Light ON	20	ChR2	Yoked	4	Left	24	6.07946	1	4	324	7.29	30	10.8	0.243	0.87	2050	310	0	0	0	0	0	0
120	D1	1	2019-12-02	Alcohol	Left	Light ON	21	ChR2	Yoked	2	Left	24.7	2.62541	1	5	133	3.39	16	8.3125	0.210625	0.57	2070	266	0	0	0	0	0	0
121	D2	2	2019-12-02	Alcohol	Right	Light ON	21	ChR2	Paired	2	Left	27.2	2.3841	1	5	270	15.54	18	15	0.863333	2.73	240	370	50	3.24	5	10	0.648	1.52
123	D4	4	2019-12-02	Alcohol	Right	Light ON	21	ChR2	Paired	2	Left	25.7	3.15406	1	5	327	5.81	14	23.3571	0.415	1.01	280	278	127	1.73	6	21.1667	0.288333	0.52
124	D5	5	2019-12-02	Alcohol	Left	Light ON	21	ChR2	Paired	2	Left	23.4	3.46408	1	5	268	12.42	23	11.6522	0.54	2.73	340	286	71	4.91	8	8.875	0.61375	2.73
125	D7	6	2019-12-02	Alcohol	Right	Light ON	21	ChR2	Yoked	2	Left	24.1	2.69077	1	5	110	2.24	12	9.16667	0.186667	0.49	4130	265	0	0	0	0	0	0
126	D1	1	2019-12-03	Alcohol	Left	Light ON	22	ChR2	Yoked	2	Left	24.7	2.62541	1	5	237	4.69	15	15.8	0.312667	1.11	4580	50	0	0	0	0	0	0
127	D2	2	2019-12-03	Alcohol	Right	Light ON	22	ChR2	Paired	2	Left	27.2	2.3841	1	5	247	18.42	12	20.5833	1.535	3.48	440	609	71	4.26	4	17.75	1.065	2.55
129	D4	4	2019-12-03	Alcohol	Right	Light ON	22	ChR2	Paired	2	Left	25.7	3.15406	1	5	328	5.07	15	21.8667	0.338	0.71	480	461	94	1.4	5	18.8	0.28	0.64
130	D5	5	2019-12-03	Alcohol	Left	Light ON	22	ChR2	Paired	2	Left	23.4	3.46408	1	5	305	12.29	23	13.2609	0.534348	1.65	280	297	112	5.11	9	12.4444	0.567778	1.65
131	D7	6	2019-12-03	Alcohol	Right	Light ON	22	ChR2	Yoked	2	Left	24.1	2.69077	1	5	114	3.3	9	12.6667	0.365556	1.62	3050	376	0	0	0	0	0	0
132	D1	1	2019-12-04	Alcohol	Left	Light ON	23	ChR2	Yoked	2	Left	24.6	1.97706	1	5	146	4.01	14	10.4286	0.275714	0.53	3420	286	0	0	0	0	0	0
133	D2	2	2019-12-04	Alcohol	Right	Light ON	23	ChR2	Paired	2	Left	27.6	1.17477	1	5	223	24.88	13	17.1538	1.91154	4.44	1070	310	61	7.8	4	15.25	1.95	3.65
135	D4	4	2019-12-04	Alcohol	Right	Light ON	23	ChR2	Paired	2	Left	26.2	4.95019	1	5	477	7.41	21	22.7143	0.352857	1.07	320	330	144	1.98	9	16	0.22	0.47
136	D5	5	2019-12-04	Alcohol	Left	Light ON	23	ChR2	Paired	2	Left	24	2.02649	1	5	266	9.2	18	14.7778	0.511111	1.28	110	395	135	4.53	11	12.2727	0.411818	1.28
137	D7	6	2019-12-04	Alcohol	Right	Light ON	23	ChR2	Yoked	2	Left	24.2	2.00974	1	5	102	2.62	8	12.75	0.3275	0.52	4550	35	0	0	0	0	0	0
138	D1	1	2019-12-05	Alcohol	Left	Light ON	24	ChR2	Yoked	2	Left	24.6	3.2951	1	5	175	3.7	18	9.72222	0.205	0.7	1980	276	0	0	0	0	0	0
139	D2	2	2019-12-05	Alcohol	Right	Light ON	24	ChR2	Paired	2	Left	27.6	2.34955	1	5	362	29.7	20	18.1	1.4845	4.74	230	352	150	15.02	8	18.75	1.8775	4.74
141	D4	4	2019-12-05	Alcohol	Right	Light ON	24	ChR2	Paired	2	Left	26.2	1.85632	1	5	167	4.69	7	23.8571	0.67	1.73	360	543	66	1.39	3	22	0.463333	0.69
142	D5	5	2019-12-05	Alcohol	Left	Light ON	24	ChR2	Paired	2	Left	24	2.70198	1	5	293	8.34	17	17.2353	0.490588	1.56	50	350	168	5.31	10	16.8	0.531	1.56
143	D7	6	2019-12-05	Alcohol	Right	Light ON	24	ChR2	Yoked	2	Left	24.2	0.334956	1	5	1	0.03	1	1	0.03	0.03	6990		0	0	0	0	0	0
144	D1	1	2019-12-06	Alcohol	Left	Light ON	25	ChR2	Yoked	4	Left	24.1	3.36346	1	5	158	3.55	26	6.07692	0.136538	0.29	480	123	1	0.01	1	1	0.01	0.01
145	D2	2	2019-12-06	Alcohol	Right	Light ON	25	ChR2	Paired	4	Left	27.8	2.91581	1	5	265	10.74	19	13.9474	0.563684	1.18	1000	607	26	1.64	2	13	0.82	0.97
147	D4	4	2019-12-06	Alcohol	Right	Light ON	25	ChR2	Paired	4	Left	26.7	4.25031	1	5	459	7.57	17	27	0.445294	0.94	260	813	90	1.5	4	22.5	0.375	0.61
148	D5	5	2019-12-06	Alcohol	Left	Light ON	25	ChR2	Paired	4	Left	23.8	3.40586	1	5	367	11.8	32	11.4688	0.36875	1.41	20	454	77	1.2	8	9.625	0.15	0.26
149	D7	6	2019-12-06	Alcohol	Right	Light ON	25	ChR2	Yoked	4	Left	24.3	7.33871	1	5	255	4.99	30	8.5	0.166333	1.1	80	353	45	0.83	6	7.5	0.138333	0.25
150	D1	1	2019-12-09	Alcohol	Left	Light ON	26	ChR2	Yoked	2	Left	24.6	2.63608	1	6	262	4.77	26	10.0769	0.183462	0.59	4340	101	0	0	0	0	0	0
151	D2	2	2019-12-09	Alcohol	Right	Light ON	26	ChR2	Paired	2	Left	28.5	2.84419	1	6	349	22.83	17	20.5294	1.34294	3.02	270	377	18	2.65	3	6	0.883333	2.24
153	D4	4	2019-12-09	Alcohol	Right	Light ON	26	ChR2	Paired	2	Left	26.9	4.21871	1	6	374	8.41	17	22	0.494706	1.34	120	352	84	1.74	5	16.8	0.348	1.12
154	D5	5	2019-12-09	Alcohol	Left	Light ON	26	ChR2	Paired	2	Left	23.7	4.10427	1	6	333	14.79	29	11.4828	0.51	1.99	170	243	82	4.45	9	9.11111	0.494444	1.99
155	D7	6	2019-12-09	Alcohol	Right	Light ON	26	ChR2	Yoked	2	Left	24.2	2.00974	1	6	94	1.88	9	10.4444	0.208889	0.66	6190	16	0	0	0	0	0	0
156	D1	1	2019-12-10	Alcohol	Left	Light ON	27	ChR2	Yoked	2	Left	24.6	3.2951	1	6	221	4.31	20	11.05	0.2155	0.92	3120	148	0	0	0	0	0	0
157	D2	2	2019-12-10	Alcohol	Right	Light ON	27	ChR2	Paired	2	Left	28.5	2.27535	1	6	253	14.68	13	19.4615	1.12231	3.6	270	546	83	4.99	4	20.75	1.2475	2.65
159	D4	4	2019-12-10	Alcohol	Right	Light ON	27	ChR2	Paired	2	Left	26.9	3.01336	1	6	431	8.28	15	28.7333	0.552	1.18	930	431	55	0.84	2	27.5	0.42	0.46
160	D5	5	2019-12-10	Alcohol	Left	Light ON	27	ChR2	Paired	2	Left	23.7	4.10427	1	6	307	12.19	21	14.619	0.576667	1.51	240	336	134	6.62	11	12.1818	0.601818	1.51
161	D7	6	2019-12-10	Alcohol	Right	Light ON	27	ChR2	Yoked	2	Left	24.2	2.67965	1	6	148	2.95	14	10.5714	0.210714	0.59	4410	103	0	0	0	0	0	0
162	D1	1	2019-12-11	Alcohol	Left	Light ON	28	ChR2	Yoked	2	Left	24.8	3.26853	1	6	411	8.51	25	16.44	0.3404	0.9	2190	185	0	0	0	0	0	0
163	D2	2	2019-12-11	Alcohol	Right	Light ON	28	ChR2	Paired	2	Left	28.4	3.42505	1	6	247	10.52	14	17.6429	0.748571	1.59	1570	403	2	0.1	1	2	0.1	0.1
165	D4	4	2019-12-11	Alcohol	Right	Light ON	28	ChR2	Paired	2	Left	26.9	3.01336	1	6	357	7.25	13	27.4615	0.557692	1.48	350	464	50	1.16	2	25	0.58	1.06
166	D5	5	2019-12-11	Alcohol	Left	Light ON	28	ChR2	Paired	2	Left	24.2	4.01948	1	6	367	11.16	23	15.9565	0.481304	1.35	220	296	84	3.8	8	10.5	0.475	1.35
167	D7	6	2019-12-11	Alcohol	Right	Light ON	28	ChR2	Yoked	2	Left	24.4	2.65769	1	6	203	3.55	15	13.5333	0.236	0.57	6090	32	0	0	0	0	0	0
168	D1	1	2019-12-12	Alcohol	Left	Light ON	29	ChR2	Yoked	2	Left	24.8	0.653705	1	6	2	0.17	2	1	0.08	0.15	400	430	2	0.16	2	1	0.08	0.15
169	D2	2	2019-12-12	Alcohol	Right	Light ON	29	ChR2	Paired	2	Left	28.4	2.28336	1	6	292	17.69	20	14.6	0.883	2.69	661	310	26	2.14	4	6.5	0.535	1.54
171	D4	4	2019-12-12	Alcohol	Right	Light ON	29	ChR2	Paired	2	Left	26.9	1.80802	1	6	240	4.36	11	21.8182	0.396364	0.88	1960	329	0	0	0	0	0	0
172	D5	5	2019-12-12	Alcohol	Left	Light ON	29	ChR2	Paired	2	Left	24.2	2.67965	1	6	291	7.28	19	15.3158	0.383158	1.66	310	280	97	2.29	9	10.7778	0.254444	0.71
173	D7	6	2019-12-12	Alcohol	Right	Light ON	29	ChR2	Yoked	2	Left	24.4	1.32884	1	6	104	2.15	13	8	0.165385	0.49	410	550	1	0.01	1	1	0.01	0.01
174	D1	1	2019-12-13	Alcohol	Left	Light ON	30	ChR2	Yoked	4	Left	24.5	3.30855	1	6	431	9.57	28	15.3929	0.341429	1.28	3400	390	0	0	0	0	0	0
175	D2	2	2019-12-13	Alcohol	Right	Light ON	30	ChR2	Paired	4	Left	28.3	4.01001	1	6	413	31.75	19	21.7368	1.67105	4.41	1772	691	99	8.13	3	33	2.71	4.23
177	D4	4	2019-12-13	Alcohol	Right	Light ON	30	ChR2	Paired	4	Left	26.8	3.62953	1	6	377	7.25	16	23.5625	0.453125	0.91	610	792	63	1.13	2	31.5	0.565	0.57
178	D5	5	2019-12-13	Alcohol	Left	Light ON	30	ChR2	Paired	4	Left	24.2	6.02921	1	6	544	18.1	31	17.5484	0.583226	1.5	210	409	126	5.13	8	15.75	0.64125	1.26
179	D7	6	2019-12-13	Alcohol	Right	Light ON	30	ChR2	Yoked	4	Left	24.2	4.01948	1	6	220	3.76	23	9.56522	0.163478	0.41	4350	192	0	0	0	0	0	0
180	D8	1	2020-01-13	Alcohol	Right	Light OFF	1	ChR2	Yoked	2	Left	23.6	0.686944	2	1	8	1.79	5	1.6	0.358	1.34	1152	655	4	1.34	1	4	1.34	1.34
182	D11	3	2020-01-13	Alcohol	Left	Light OFF	1	eGFP	Yoked	2	Left	20.5	0	2	1	0	0	0	0	0	0	7200		0	0	0	0	0	0
184	D13	5	2020-01-13	Alcohol	Left	Light OFF	1	eGFP	Paired	2	Left	23.4	1.38563	2	1	322	25.95	84	3.83333	0.308214	1.69	2219	59	0	0	0	0	0	0
185	D8	1	2020-01-14	Alcohol	Right	Light OFF	2	ChR2	Yoked	2	Left	23.6	2.61039	2	1	506	28.96	159	3.18239	0.177296	2.29	104	42	46	3.49	27	1.7037	0.129259	1.3
187	D11	3	2020-01-14	Alcohol	Left	Light OFF	2	eGFP	Yoked	2	Left	20.5	2.84697	2	1	714	36.86	216	3.30556	0.168565	0.87	208	27	178	9.96	60	2.96667	0.166	0.8
189	D13	5	2020-01-14	Alcohol	Left	Light OFF	2	eGFP	Paired	2	Left	23.4	1.73204	2	1	239	12.68	77	3.1039	0.157532	0.69	234	91	50	3.82	20	2.5	0.191	0.69
190	D8	1	2020-01-15	Alcohol	Right	Light OFF	3	ChR2	Yoked	2	Left	24.1	1.749	2	1	225	6.53	57	3.94737	0.107895	0.51	254	51	10	0.18	7	1.42857	0.0257143	0.06
192	D11	3	2020-01-15	Alcohol	Left	Light OFF	3	eGFP	Yoked	2	Left	20.2	3.77207	2	1	812	62.04	202	4.0198	0.305149	2.95	116	34	317	20.92	83	3.81928	0.252048	2.63
194	D13	5	2020-01-15	Alcohol	Left	Light OFF	3	eGFP	Paired	2	Left	23.4	3.25623	2	1	447	19.39	115	3.88696	0.167043	0.64	114	61	121	6.61	37	3.27027	0.178649	0.61
195	D8	1	2020-01-16	Alcohol	Right	Light OFF	4	ChR2	Yoked	2	Left	24.1	2.55623	2	1	305	11.82	56	5.44643	0.210536	1.31	946	71	1	0.04	1	1	0.04	0.04
197	D11	3	2020-01-16	Alcohol	Left	Light OFF	4	eGFP	Yoked	2	Left	20.2	2.16694	2	1	379	18.77	73	5.19178	0.256849	0.88	2082	35	0	0	0	0	0	0
199	D13	5	2020-01-16	Alcohol	Left	Light OFF	4	eGFP	Paired	2	Left	23.4	2.07845	2	1	400	25.91	108	3.7037	0.236759	1.16	62	66	14	1.47	5	2.8	0.294	0.59
200	D8	1	2020-01-17	Alcohol	Right	Light OFF	5	ChR2	Yoked	4	Left	24.5	2.71301	2	1	272	12.98	48	5.66667	0.268333	1.42	1005	275	70	3.18	14	5	0.227143	0.79
202	D11	3	2020-01-17	Alcohol	Left	Light OFF	5	eGFP	Yoked	4	Left	20.3	3.43404	2	1	461	20.97	106	4.34906	0.19717	1.16	160	60	232	9.46	58	4	0.163103	0.59
204	D13	5	2020-01-17	Alcohol	Left	Light OFF	5	eGFP	Paired	4	Left	24.4	4.91672	2	1	460	30.93	128	3.59375	0.24	1.25	124	106	83	6.57	27	3.07407	0.243333	0.75
205	D8	1	2020-01-20	Alcohol	Right	Light OFF	6	ChR2	Yoked	2	Left	26	4.05297	2	2	427	29.46	75	5.69333	0.3916	1.86	192	88	59	4.68	12	4.91667	0.39	1.3
207	D11	3	2020-01-20	Alcohol	Left	Light OFF	6	eGFP	Yoked	2	Left	21.1	2.07451	2	2	465	18.91	89	5.22472	0.212472	0.76	514	75	10	0.27	4	2.5	0.0675	0.12
209	D13	5	2020-01-20	Alcohol	Left	Light OFF	6	eGFP	Paired	2	Left	24.9	2.4741	2	2	357	14.59	79	4.51899	0.183924	0.86	150	88	38	3.5	20	1.9	0.175	0.86
210	D8	1	2020-01-21	Alcohol	Right	Light OFF	7	ChR2	Yoked	2	Left	26	1.43413	2	2	211	14.93	41	5.14634	0.35561	1.39	312	164	5	1.31	2	2.5	0.655	0.82
212	D11	3	2020-01-21	Alcohol	Left	Light OFF	7	eGFP	Yoked	2	Left	21.1	3.68801	2	2	546	30.45	90	6.06667	0.338333	1.82	216	77	115	6.33	21	5.47619	0.301429	1.16
214	D13	5	2020-01-21	Alcohol	Left	Light OFF	7	eGFP	Paired	2	Left	24.9	2.60432	2	2	348	14.41	65	5.35385	0.220308	1.21	234	45	155	6.25	30	5.16667	0.208333	1.21
215	D8	1	2020-01-22	Alcohol	Right	Light OFF	8	ChR2	Yoked	2	Left	26.2	2.90824	2	2	262	14.11	56	4.67857	0.237857	1.33	154	127	57	4.19	17	3.35294	0.246471	1.33
217	D11	3	2020-01-22	Alcohol	Left	Light OFF	8	eGFP	Yoked	2	Left	21.2	3.51767	2	2	422	30.7	70	6.02857	0.437571	1.74	112	85	153	9.41	27	5.66667	0.348519	1.28
219	D13	5	2020-01-22	Alcohol	Left	Light OFF	8	eGFP	Paired	2	Left	25.2	3.79564	2	2	383	8.03	77	4.97403	0.103896	0.48	228	62	158	3.58	31	5.09677	0.115484	0.48
220	D8	1	2020-01-23	Alcohol	Right	Light OFF	9	ChR2	Yoked	2	Left	26.2	3.03199	2	2	244	11.38	45	5.42222	0.251778	1.6	116	157	36	2.25	10	3.6	0.225	0.6
222	D11	3	2020-01-23	Alcohol	Left	Light OFF	9	eGFP	Yoked	2	Left	21.2	3.74709	2	2	455	30.02	79	5.75949	0.374051	2.32	44	78	137	9.61	28	4.89286	0.343214	1.57
224	D13	5	2020-01-23	Alcohol	Left	Light OFF	9	eGFP	Paired	2	Left	25.2	2.50898	2	2	345	7.69	50	6.9	0.1534	0.46	92	95	96	2.45	16	6	0.153125	0.46
225	D8	1	2020-01-24	Alcohol	Right	Light OFF	10	ChR2	Yoked	4	Left	26.2	4.64081	2	2	397	21.34	74	5.36486	0.288243	1.26	68	129	53	2.88	14	3.78571	0.205714	0.67
227	D11	3	2020-01-24	Alcohol	Left	Light OFF	10	eGFP	Yoked	4	Left	21.5	5.4291	2	2	574	41.49	112	5.125	0.370446	1.58	50	82	111	6.61	25	4.44	0.2644	1.39
229	D13	5	2020-01-24	Alcohol	Left	Light OFF	10	eGFP	Paired	4	Left	25.5	3.75099	2	2	381	6.99	64	5.95312	0.108594	0.28	94	97	37	0.98	14	2.64286	0.07	0.28
230	D8	1	2020-01-27	Alcohol	Right	Light OFF	11	ChR2	Yoked	2	Left	27.1	3.35006	2	3	245	13.27	48	5.10417	0.276458	0.94	160	149	33	1.33	8	4.125	0.16625	0.89
232	D11	3	2020-01-27	Alcohol	Left	Light OFF	11	eGFP	Yoked	2	Left	21.9	3.25718	2	3	269	15.4	55	4.89091	0.28	1.5	202	116	84	3.21	16	5.25	0.200625	0.97
234	D13	5	2020-01-27	Alcohol	Left	Light OFF	11	eGFP	Paired	2	Left	25.7	2.27093	2	3	208	3.85	33	6.30303	0.116667	0.24	90	222	52	1.31	9	5.77778	0.145556	0.24
235	D8	1	2020-01-28	Alcohol	Right	Light OFF	12	ChR2	Yoked	2	Left	27.1	4.06793	2	3	399	20.74	80	4.9875	0.25925	1.5	124	89	61	6.05	17	3.58824	0.355882	1.5
237	D11	3	2020-01-28	Alcohol	Left	Light OFF	12	eGFP	Yoked	2	Left	21.9	4.1455	2	3
239	D13	5	2020-01-28	Alcohol	Left	Light OFF	12	eGFP	Paired	2	Left	25.7	1.64011	2	3	207	3.56	27	7.66667	0.131852	0.52	3407	39	0	0	0	0	0	0
240	D8	1	2020-01-29	Alcohol	Right	Light OFF	13	ChR2	Yoked	2	Left	27.4	2.89921	2	3	274	17.83	54	5.07407	0.316481	1.53	70	123	52	4.65	16	3.25	0.290625	0.88
242	D11	3	2020-01-29	Alcohol	Left	Light OFF	13	eGFP	Yoked	2	Left	22.1	3.81456	2	3	406	20.04	65	6.24615	0.308308	1.4	56	110	146	6.05	26	5.61538	0.232692	1.26
244	D13	5	2020-01-29	Alcohol	Left	Light OFF	13	eGFP	Paired	2	Left	26.4	2.39494	2	3	292	5.79	47	6.21277	0.119787	0.82	287	137	98	2.14	17	5.76471	0.125882	0.82
245	D8	1	2020-01-30	Alcohol	Right	Light OFF	14	ChR2	Yoked	2	Left	27.4	3.01754	2	3	369	20.43	58	6.36207	0.336207	1.37	64	115	82	5.29	17	4.82353	0.311176	1.04
247	D11	3	2020-01-30	Alcohol	Left	Light OFF	14	eGFP	Yoked	2	Left	22.1	4.32806	2	3	241	20.24	66	3.65152	0.306667	2.4	40	107	82	7.68	25	3.28	0.3072	2.4
249	D13	5	2020-01-30	Alcohol	Left	Light OFF	14	eGFP	Paired	2	Left	26.4	2.45635	2	3	250	4.82	37	6.75676	0.128649	0.47	388	142	145	2.67	20	7.25	0.1335	0.35
250	D8	1	2020-01-31	Alcohol	Right	Light OFF	15	ChR2	Yoked	4	Left	27.4	4.9109	2	3	343	19.9	70	4.9	0.281571	0.9	128	151	61	3.17	12	5.08333	0.264167	0.72
252	D11	3	2020-01-31	Alcohol	Left	Light OFF	15	eGFP	Yoked	4	Left	21.9	5.47799	2	3	336	20.67	83	4.04819	0.249036	1.41	68	117	101	6.78	24	4.20833	0.2825	1.41
254	D13	5	2020-01-31	Alcohol	Left	Light OFF	15	eGFP	Paired	4	Left	25.8	4.14723	2	3	469	8.72	71	6.60563	0.122817	0.59	196	128	168	3.57	27	6.22222	0.132222	0.59
255	D8	1	2020-02-03	Alcohol	Right	Light ON	16	ChR2	Yoked	2	Left	27.8	3.6156	2	4	229	17.46	47	4.87234	0.371064	0.99	54	152	43	3.12	11	3.90909	0.283636	0.69
257	D11	3	2020-02-03	Alcohol	Left	Light ON	16	eGFP	Yoked	2	Left	22.6	4.08884	2	4	244	16.02	58	4.2069	0.276207	1.99	40	124	50	3.36	16	3.125	0.21	1.09
259	D13	5	2020-02-03	Alcohol	Left	Light ON	16	eGFP	Paired	2	Left	26.6	2.62072	2	4	306	4.36	44	6.95455	0.0990909	0.57	473	116	57	0.92	10	5.7	0.092	0.24
260	D8	1	2020-02-04	Alcohol	Right	Light ON	17	ChR2	Yoked	2	Left	27.8	3.2657	2	4	249	11.95	44	5.65909	0.271591	0.84	42	145	61	3.43	10	6.1	0.343	0.63
262	D11	3	2020-02-04	Alcohol	Left	Light ON	17	eGFP	Yoked	2	Left	22.6	4.37577	2	4	427	15.35	65	6.56923	0.235692	1.01	42	94	175	5.94	28	6.25	0.212143	0.61
264	D13	5	2020-02-04	Alcohol	Left	Light ON	17	eGFP	Paired	2	Left	26.6	3.65682	2	4	430	6.78	59	7.28814	0.114915	0.21	92	117	44	0.82	10	4.4	0.082	0.2
265	D8	1	2020-02-05	Alcohol	Right	Light ON	18	ChR2	Yoked	2	Left	27.9	3.60264	2	4	242	13.77	50	4.84	0.2754	0.82	18	138	87	4.68	18	4.83333	0.26	0.68
267	D11	3	2020-02-05	Alcohol	Left	Light ON	18	eGFP	Yoked	2	Left	22.8	4.40849	2	4	9	0.22	9	1	0.0244444	0.07	348	718	1	0	1	1	0	0
269	D13	5	2020-02-05	Alcohol	Left	Light ON	18	eGFP	Paired	2	Left	27.1	3.35006	2	4	348	6.15	63	5.52381	0.097619	0.2	220	87	132	2.48	24	5.5	0.103333	0.2
270	D8	1	2020-02-06	Alcohol	Right	Light ON	19	ChR2	Yoked	2	Left	27.9	2.90536	2	4	279	11.97	42	6.64286	0.260238	1	70	163	66	2.82	12	5.5	0.235	0.66
272	D11	3	2020-02-06	Alcohol	Left	Light ON	19	eGFP	Yoked	2	Left	22.8	4.4796	2	4	438	19.07	66	6.63636	0.288636	1.29	146	95	163	6.52	25	6.52	0.2608	0.73
274	D13	5	2020-02-06	Alcohol	Left	Light ON	19	eGFP	Paired	2	Left	27.1	1.97414	2	4	267	4.82	54	4.94444	0.0892593	0.28	413	119	93	1.86	18	5.16667	0.103333	0.28
275	D8	1	2020-02-07	Alcohol	Right	Light ON	20	ChR2	Yoked	4	Left	27.6	5.58018	2	4	390	14.85	68	5.73529	0.217941	0.85	72	167	112	3.67	18	6.22222	0.203889	0.55
277	D11	3	2020-02-07	Alcohol	Left	Light ON	20	eGFP	Yoked	4	Left	22.5	5.11575	2	4	254	11.05	65	3.90769	0.17	1.1	168	123	71	2.92	20	3.55	0.146	0.5
279	D13	5	2020-02-07	Alcohol	Left	Light ON	20	eGFP	Paired	4	Left	27	3.30242	2	4	404	6.01	56	7.21429	0.105714	0.22	309	140	4	0.13	4	1	0.0325	0.06
280	D8	1	2020-02-10	Alcohol	Right	Light ON	21	ChR2	Yoked	2	Left	27.6	2.34955	2	5	125	7.19	30	4.16667	0.223667	1.24	76	221	36	2.84	10	3.6	0.284	1.24
282	D11	3	2020-02-10	Alcohol	Left	Light ON	21	eGFP	Yoked	2	Left	22.5	3.60264	2	5	177	11.44	46	3.84783	0.237391	0.68	176	141	88	5.2	24	3.66667	0.216667	0.53
284	D13	5	2020-02-10	Alcohol	Left	Light ON	21	eGFP	Paired	2	Left	27.4	3.84589	2	5	453	6.25	71	6.38028	0.0880282	0.26	171	97	140	1.94	22	6.36364	0.0881818	0.24
285	D8	1	2020-02-11	Alcohol	Right	Light ON	22	ChR2	Yoked	2	Left	27.6	2.64324	2	5
287	D11	3	2020-02-11	Alcohol	Left	Light ON	22	eGFP	Yoked	2	Left	22.5	3.74675	2	5	392	18.39	55	7.12727	0.331636	1.12	388	78	106	4.54	16	6.625	0.28375	1.12
289	D13	5	2020-02-11	Alcohol	Left	Light ON	22	eGFP	Paired	2	Left	27.4	2.3667	2	5	323	5.4	48	6.72917	0.1125	0.25	280	80	164	2.7	25	6.56	0.108	0.25
290	D8	1	2020-02-12	Alcohol	Right	Light ON	23	ChR2	Yoked	2	Left	27.7	2.51665	2	5	263	8.03	38	6.92105	0.211316	0.68	78	185	95	2.25	12	7.91667	0.1875	0.38
292	D11	3	2020-02-12	Alcohol	Left	Light ON	23	eGFP	Yoked	2	Left	22.3	4.07115	2	5	236	10.06	52	4.53846	0.181731	0.7	198	123	87	3.61	20	4.35	0.1805	0.7
294	D13	5	2020-02-12	Alcohol	Left	Light ON	23	eGFP	Paired	2	Left	27.1	4.24739	2	5	551	8.02	80	6.8875	0.10025	0.24	261	77	142	2.27	23	6.17391	0.0986957	0.24
295	D8	1	2020-02-13	Alcohol	Right	Light ON	24	ChR2	Yoked	2	Left	27.7	3.27749	2	5	187	7.59	38	4.92105	0.198421	0.6	108	173	67	2.49	16	4.1875	0.155625	0.6
297	D11	3	2020-02-13	Alcohol	Left	Light ON	24	eGFP	Yoked	2	Left	22.3	3.78035	2	5	125	6.56	43	2.90698	0.151395	0.64	150	148	43	1.72	13	3.30769	0.132308	0.37
299	D13	5	2020-02-13	Alcohol	Left	Light ON	24	eGFP	Paired	2	Left	27.1	3.35006	2	5	339	4.5	51	6.64706	0.087451	0.19	108	127	112	1.32	17	6.58824	0.0776471	0.15
300	D8	1	2020-02-14	Alcohol	Right	Light ON	25	ChR2	Yoked	4	Left	27.1	5.3242	2	5	412	14.12	60	6.86667	0.2285	0.7	114	216	60	1.59	9	6.66667	0.176667	0.3
302	D11	3	2020-02-14	Alcohol	Left	Light ON	25	eGFP	Yoked	4	Left	22.8	6.82606	2	5	567	22.87	89	6.37079	0.256966	0.95	106	152	132	5.57	19	6.94737	0.293158	0.9
304	D13	5	2020-02-14	Alcohol	Left	Light ON	25	eGFP	Paired	4	Left	27.1	4.54651	2	5	545	7.96	76	7.17105	0.104737	0.2	174	97	116	1.87	17	6.82353	0.11	0.2
305	D8	1	2020-02-17	Alcohol	Right	Light ON	26	ChR2	Yoked	2	Left	27.6	1.93838	2	6	132	5.29	23	5.73913	0.229565	0.82	178	264	30	1.65	6	5	0.275	0.82
307	D11	3	2020-02-17	Alcohol	Left	Light ON	26	eGFP	Yoked	2	Left	23.1	2.66689	2	6	249	9.55	35	7.11429	0.272857	1.13	380	168	103	4.75	17	6.05882	0.279412	1.13
309	D13	5	2020-02-17	Alcohol	Left	Light ON	26	eGFP	Paired	2	Left	27.9	4.18371	2	6	499	6.51	79	6.31646	0.0824051	0.16	465	82	151	2.04	24	6.29167	0.085	0.16
310	D8	1	2020-02-18	Alcohol	Right	Light ON	27	ChR2	Yoked	2	Left	27.6	2.70198	2	6	231	7.26	37	6.24324	0.196216	0.51	210	171	51	1.82	10	5.1	0.182	0.51
312	D11	3	2020-02-18	Alcohol	Left	Light ON	27	eGFP	Yoked	2	Left	23.1	4.1407	2	6	349	8.84	50	6.98	0.1768	0.39	292	116	104	2.93	16	6.5	0.183125	0.39
314	D13	5	2020-02-18	Alcohol	Left	Light ON	27	eGFP	Paired	2	Left	27.9	3.31211	2	6	475	6.96	65	7.30769	0.107077	0.2	258	108	163	2.38	22	7.40909	0.108182	0.19
315	D8	1	2020-02-19	Alcohol	Right	Light ON	28	ChR2	Yoked	2	Left	28.5	2.95796	2	6	53	3.9	21	2.52381	0.185714	0.76	122	351	16	1.48	8	2	0.185	0.76
317	D11	3	2020-02-19	Alcohol	Left	Light ON	28	eGFP	Yoked	2	Left	23	3.94724	2	6	169	7.18	45	3.75556	0.159333	0.62	264	155	56	2.91	18	3.11111	0.161667	0.62
319	D13	5	2020-02-19	Alcohol	Left	Light ON	28	eGFP	Paired	2	Left	28	3.12658	2	6	292	5.16	44	6.63636	0.116136	0.23	334	123	119	2	19	6.26316	0.105263	0.22
320	D8	1	2020-02-20	Alcohol	Right	Light ON	29	ChR2	Yoked	2	Left	28.5	2.90107	2	6	104	4.14	29	3.58621	0.142069	0.56	182	219	31	0.97	9	3.44444	0.107778	0.43
322	D11	3	2020-02-20	Alcohol	Left	Light ON	29	eGFP	Yoked	2	Left	23	3.45384	2	6	299	9.33	47	6.3617	0.198511	0.86	526	124	80	2.53	16	5	0.158125	0.86
324	D13	5	2020-02-20	Alcohol	Left	Light ON	29	eGFP	Paired	2	Left	28	3.01078	2	6	414	6.25	56	7.39286	0.111607	0.2	150	114	110	1.95	17	6.47059	0.114706	0.2
325	D8	1	2020-02-21	Alcohol	Right	Light ON	30	ChR2	Yoked	4	Left	28.2	5.05903	2	6	279	14.22	59	4.72881	0.240847	3.27	154	149	29	1.03	8	3.625	0.12875	0.42
327	D11	3	2020-02-21	Alcohol	Left	Light ON	30	eGFP	Yoked	4	Left	23.5	5.93286	2	6	110	11.01	58	1.89655	0.170862	0.79	188	201	31	1.5	15	2.06667	0.1	0.38
329	D13	5	2020-02-21	Alcohol	Left	Light ON	30	eGFP	Paired	4	Left	27.9	5.11343	2	6	559	9.66	90	6.21111	0.106778	0.24	140	124	114	2.15	23	4.95652	0.0934783	0.23
330	D23	5	2020-07-20	Alcohol	Right	Light OFF	1	eGFP	Paired	2	Right	21.1	0	4	1	0	0	0	0	0	0	7200		0	0	0	0	0	0
331	D24	14	2020-07-20	Alcohol	Left	Light OFF	1	eGFP	Yoked	2	Right	23.7	2.25735	4	1	831	241.26	329	2.52584	0.721915	3.54	704	19	307	106.63	120	2.55833	0.888583	3.41
332	D25	15	2020-07-20	Alcohol	Right	Light OFF	1	eGFP	Paired	2	Right	21.4	0	4	1	0	0	0	0	0	0	7200		0	0	0	0	0	0
333	D28	17	2020-07-20	Alcohol	Left	Light OFF	1	ChR2	Paired	2	Right	24.2	0	4	1	0	0	0	0	0	0	7200		0	0	0	0	0	0
334	D31	18	2020-07-20	Alcohol	Left	Light OFF	1	eGFP	Yoked	2	Right	22.7	0	4	1	0	0	0	0	0	0	7200		0	0	0	0	0	0
335	D34	20	2020-07-20	Alcohol	Left	Light OFF	1	ChR2	Yoked	2	Right	22.9	0	4	1	0	0	0	0	0	0	7200		0	0	0	0	0	0
336	D23	5	2020-07-21	Alcohol	Right	Light OFF	2	eGFP	Paired	2	Right	21.1	0	4	1	0	0	0	0	0	0	7200		0	0	0	0	0	0
337	D24	14	2020-07-21	Alcohol	Left	Light OFF	2	eGFP	Yoked	2	Right	23.7	3.62544	4	1	623	114.37	230	2.7087	0.490261	3	58	28	123	19.56	57	2.15789	0.343158	1.63
338	D25	15	2020-07-21	Alcohol	Right	Light OFF	2	eGFP	Paired	2	Right	21.4	0	4	1
339	D28	17	2020-07-21	Alcohol	Left	Light OFF	2	ChR2	Paired	2	Right	24.2	1.40682	4	1	219	15.78	92	2.38043	0.170435	2.86	2708	46	0	0	0	0	0	0
340	D31	18	2020-07-21	Alcohol	Left	Light OFF	2	eGFP	Yoked	2	Right	22.7	0	4	1	0	0	0	0	0	0	7200		0	0	0	0	0	0
341	D34	20	2020-07-21	Alcohol	Left	Light OFF	2	ChR2	Yoked	2	Right	22.9	0	4	1	0	0	0	0	0	0	7200		0	0	0	0	0	0
342	D23	5	2020-07-22	Alcohol	Right	Light OFF	3	eGFP	Paired	2	Right	21.8	0.148733	4	1	52	3.33	13	4	0.233077	0.58	7047	11	0	0	0	0	0	0
343	D24	14	2020-07-22	Alcohol	Left	Light OFF	3	eGFP	Yoked	2	Right	24.1	3.22892	4	1	532	56.5	198	2.68687	0.280505	1.52	52	28	189	24.61	82	2.30488	0.300122	1.52
344	D25	15	2020-07-22	Alcohol	Right	Light OFF	3	eGFP	Paired	2	Right	22	0	4	1	0	0	0	0	0	0	7200		0	0	0	0	0	0
345	D28	17	2020-07-22	Alcohol	Left	Light OFF	3	ChR2	Paired	2	Right	25	1.81573	4	1	826	121.49	253	3.26482	0.470514	2.51	188	26	202	34.96	68	2.97059	0.514118	2.16
346	D31	18	2020-07-22	Alcohol	Left	Light OFF	3	eGFP	Yoked	2	Right	22.9	0	4	1	0	0	0	0	0	0	7200		0	0	0	0	0	0
347	D34	20	2020-07-22	Alcohol	Left	Light OFF	3	ChR2	Yoked	2	Right	23.5	0	4	1	0	0	0	0	0	0	7200		0	0	0	0	0	0
348	D23	5	2020-07-23	Alcohol	Right	Light OFF	4	eGFP	Paired	2	Right	21.8	0.743664	4	1	161	9.85	51	3.15686	0.191373	0.78	4510	49	0	0	0	0	0	0
349	D24	14	2020-07-23	Alcohol	Left	Light OFF	4	eGFP	Yoked	2	Right	24.1	2.21988	4	1	473	68.99	150	3.15333	0.458933	3.5	340	45	182	31.99	61	2.98361	0.524426	3.5
350	D25	15	2020-07-23	Alcohol	Right	Light OFF	4	eGFP	Paired	2	Right	22	0	4	1	0	0	0	0	0	0	7200		0	0	0	0	0	0
351	D28	17	2020-07-23	Alcohol	Left	Light OFF	4	ChR2	Paired	2	Right	25	3.30722	4	1	647	42.77	149	4.34228	0.282685	1.75	200	37	136	10.66	40	3.4	0.2665	1.75
352	D31	18	2020-07-23	Alcohol	Left	Light OFF	4	eGFP	Yoked	2	Right	22.9	0	4	1	0	0	0	0	0	0	7200		0	0	0	0	0	0
353	D34	20	2020-07-23	Alcohol	Left	Light OFF	4	ChR2	Yoked	2	Right	23.5	0	4	1	0	0	0	0	0	0	7200		0	0	0	0	0	0
354	D23	5	2020-07-24	Alcohol	Right	Light OFF	5	eGFP	Paired	4	Right	21.9	3.92342	4	1	764	53.22	185	4.12973	0.286757	1.4	1326	70	6	0.27	4	1.5	0.0675	0.12
355	D24	14	2020-07-24	Alcohol	Left	Light OFF	5	eGFP	Yoked	4	Right	24.4	5.18249	4	1	640	110.87	157	4.07643	0.703185	3.14	56	82	125	22.42	40	3.125	0.5605	2.5
356	D25	15	2020-07-24	Alcohol	Right	Light OFF	5	eGFP	Paired	4	Right	21.7	0	4	1	0	0	0	0	0	0	14400		0	0	0	0	0	0
357	D28	17	2020-07-24	Alcohol	Left	Light OFF	5	ChR2	Paired	4	Right	25.5	5.14966	4	1	976	59.25	196	4.97959	0.301224	1.83	154	62	31	1.08	13	2.38462	0.0830769	0.36
358	D31	18	2020-07-24	Alcohol	Left	Light OFF	5	eGFP	Yoked	4	Right	22.8	0.213314	4	1	9	1.33	4	2.25	0.3325	0.58	3950	242	0	0	0	0	0	0
359	D34	20	2020-07-24	Alcohol	Left	Light OFF	5	ChR2	Yoked	4	Right	22.9	0	4	1	0	0	0	0	0	0	14400		0	0	0	0	0	0
360	D23	5	2020-07-27	Alcohol	Right	Light OFF	6	eGFP	Paired	2	Right	22.3	0.363495	4	2	22	0.42	4	5.5	0.105	0.15	2066	1544	0	0	0	0	0	0
361	D24	14	2020-07-27	Alcohol	Left	Light OFF	6	eGFP	Yoked	2	Right	25.3	3.33209	4	2	141	11.55	50	2.82	0.2304	0.96	194	101	67	4.96	22	3.04545	0.225455	0.82
362	D25	15	2020-07-27	Alcohol	Right	Light OFF	6	eGFP	Paired	2	Right	22.3	0	4	2	0	0	0	0	0	0	7200		0	0	0	0	0	0
363	D28	17	2020-07-27	Alcohol	Left	Light OFF	6	ChR2	Paired	2	Right	25.8	2.76482	4	2	364	27.54	81	4.49383	0.33963	1.15	238	78	76	5.39	21	3.61905	0.256667	0.92
364	D31	18	2020-07-27	Alcohol	Left	Light OFF	6	eGFP	Yoked	2	Right	23.4	3.67192	4	2	955	111.53	320	2.98438	0.343344	1.96	564	16	375	38.16	114	3.28947	0.334737	1.96
365	D34	20	2020-07-27	Alcohol	Left	Light OFF	6	ChR2	Yoked	2	Right	23.5	0	4	2	0	0	0	0	0	0	7200		0	0	0	0	0	0
366	D23	5	2020-07-28	Alcohol	Right	Light OFF	7	eGFP	Paired	2	Right	22.3	0.363495	4	2	256	31.95	88	2.90909	0.360341	1.11	362	73	38	2.23	11	3.45455	0.202727	0.41
367	D24	14	2020-07-28	Alcohol	Left	Light OFF	7	eGFP	Yoked	2	Right	25.3	3.20393	4	2	352	27.31	77	4.57143	0.353896	2.44	90	83	91	10.29	25	3.64	0.4116	2.44
368	D25	15	2020-07-28	Alcohol	Right	Light OFF	7	eGFP	Paired	2	Right	22.3	2.98066	4	2	390	28.04	144	2.70833	0.190903	1.11	553	45	132	6.84	51	2.58824	0.134118	0.72
369	D28	17	2020-07-28	Alcohol	Left	Light OFF	7	ChR2	Paired	2	Right	25.8	3.14184	4	2	370	35.81	98	3.77551	0.363878	1.8	86	73	106	12.88	39	2.71795	0.330256	1.37
370	D31	18	2020-07-28	Alcohol	Left	Light OFF	7	eGFP	Yoked	2	Right	23.4	2.49414	4	2	409	34.36	165	2.47879	0.205212	1.52	50	42	31	1.66	23	1.34783	0.0721739	0.21
371	D34	20	2020-07-28	Alcohol	Left	Light OFF	7	ChR2	Yoked	2	Right	23.5	0	4	2	0	0	0	0	0	0	7200		0	0	0	0	0	0
372	D23	5	2020-07-29	Alcohol	Right	Light OFF	8	eGFP	Paired	2	Right	23	1.76216	4	2	283	17.63	85	3.32941	0.205176	1.09	2320	44	0	0	0	0	0	0
373	D24	14	2020-07-29	Alcohol	Left	Light OFF	8	eGFP	Yoked	2	Right	25.7	3.21714	4	2	268	39.82	62	4.32258	0.619032	3.44	234	111	51	4.38	13	3.92308	0.336923	1.18
374	D25	15	2020-07-29	Alcohol	Right	Light OFF	8	eGFP	Paired	2	Right	22.5	2.81006	4	2	601	72.72	224	2.68304	0.321696	1.76	256	30	135	12.92	51	2.64706	0.253333	1.41
375	D28	17	2020-07-29	Alcohol	Left	Light OFF	8	ChR2	Paired	2	Right	25.6	2.9764	4	2	219	16.69	64	3.42188	0.260625	1.8	48	113	80	4.22	21	3.80952	0.200952	0.74
376	D31	18	2020-07-29	Alcohol	Left	Light OFF	8	eGFP	Yoked	2	Right	23.6	3.36603	4	2	966	90.1	296	3.26351	0.302703	1.58	62	23	377	28.9	108	3.49074	0.267593	1.12
377	D34	20	2020-07-29	Alcohol	Left	Light OFF	8	ChR2	Yoked	2	Right	23.7	0.0684046	4	2	8	0.49	4	2	0.1225	0.14	5931	212	0	0	0	0	0	0
378	D23	5	2020-07-30	Alcohol	Right	Light OFF	9	eGFP	Paired	2	Right	23	2.46703	4	2	355	23.97	102	3.48039	0.234706	1.15	128	50	16	0.49	5	3.2	0.098	0.24
379	D24	14	2020-07-30	Alcohol	Left	Light OFF	9	eGFP	Yoked	2	Right	25.7	3.28023	4	2	218	12.4	56	3.89286	0.209464	1.01	134	124	72	4.1	19	3.78947	0.215789	0.87
380	D25	15	2020-07-30	Alcohol	Right	Light OFF	9	eGFP	Paired	2	Right	22.5	2.88211	4	2	585	97.38	215	2.72093	0.431256	2.22	124	32	215	38.05	99	2.17172	0.384343	2.22
381	D28	17	2020-07-30	Alcohol	Left	Light OFF	9	ChR2	Paired	2	Right	25.6	2.40645	4	2	187	12.89	53	3.5283	0.242642	1.1	78	136	102	7.69	30	3.4	0.256333	0.92
382	D31	18	2020-07-30	Alcohol	Left	Light OFF	9	eGFP	Yoked	2	Right	23.6	3.7095	4	2	377	33.22	123	3.06504	0.265691	1.84	60	58	122	9.08	49	2.4898	0.185306	1.17
383	D34	20	2020-07-30	Alcohol	Left	Light OFF	9	ChR2	Yoked	2	Right	23.7	2.87299	4	2	453	42.37	206	2.19903	0.19966	1.89	212	33	158	10.09	73	2.16438	0.138219	1.89
384	D23	5	2020-07-31	Alcohol	Right	Light OFF	10	eGFP	Paired	4	Right	23.1	3.3687	4	2	416	33.42	127	3.27559	0.261732	1.66	2948	88	0	0	0	0	0	0
385	D24	14	2020-07-31	Alcohol	Left	Light OFF	10	eGFP	Yoked	4	Right	25.4	3.6381	4	2	133	7.63	43	3.09302	0.177442	0.69	440	193	38	1.51	10	3.8	0.151	0.41
386	D25	15	2020-07-31	Alcohol	Right	Light OFF	10	eGFP	Paired	4	Right	22.9	3.96448	4	2	451	38.64	157	2.87261	0.241847	1.43	78	86	101	8.96	40	2.525	0.224	1.06
387	D28	17	2020-07-31	Alcohol	Left	Light OFF	10	ChR2	Paired	4	Right	26.3	3.76017	4	2	221	15.35	71	3.11268	0.215775	1.29	80	133	30	2.64	15	2	0.176	1.28
388	D31	18	2020-07-31	Alcohol	Left	Light OFF	10	eGFP	Yoked	4	Right	24.3	5.27053	4	2	378	45.18	163	2.31902	0.275092	1.9	18	87	96	11.47	48	2	0.238958	1.45
389	D34	20	2020-07-31	Alcohol	Left	Light OFF	10	ChR2	Yoked	4	Right	23.4	6.09678	4	2	1169	164.95	505	2.31485	0.318832	3.4	54	21	299	33.44	145	2.06207	0.230621	2
390	D23	5	2020-08-03	Alcohol	Right	Light OFF	11	eGFP	Paired	2	Right	23.3	1.87863	4	3	183	9.13	42	4.35714	0.216667	1.43	546	133	2	0.01	2	1	0.005	0.01
391	D24	14	2020-08-03	Alcohol	Left	Light OFF	11	eGFP	Yoked	2	Right	25.7	2.46017	4	3	197	8.36	32	6.15625	0.258437	0.8	248	135	47	2.55	9	5.22222	0.283333	0.73
392	D25	15	2020-08-03	Alcohol	Right	Light OFF	11	eGFP	Paired	2	Right	23.1	2.73707	4	3	407	18.31	83	4.90361	0.22012	1.74	132	84	69	2.64	26	2.65385	0.101538	0.62
393	D28	17	2020-08-03	Alcohol	Left	Light OFF	11	ChR2	Paired	2	Right	26.1	3.04361	4	3	232	18.24	70	3.31429	0.260429	1.87	126	98	46	4.59	18	2.55556	0.255	1.53
394	D31	18	2020-08-03	Alcohol	Left	Light OFF	11	eGFP	Yoked	2	Right	24.7	3.47866	4	3	334	30.44	103	3.24272	0.29534	1.46	88	60	101	10.14	37	2.72973	0.274054	1.46
395	D34	20	2020-08-03	Alcohol	Left	Light OFF	11	ChR2	Yoked	2	Right	23.8	1.9754	4	3	345	27.48	136	2.53676	0.199926	1.59	122	51	60	3.98	27	2.22222	0.147407	0.87
396	D23	5	2020-08-04	Alcohol	Right	Light OFF	12	eGFP	Paired	2	Right	23.3	0.765368	4	3	65	3.64	18	3.61111	0.196667	1.05	298	388	2	0.02	1	2	0.02	0.02
397	D24	14	2020-08-04	Alcohol	Left	Light OFF	12	eGFP	Yoked	2	Right	25.7	2.77558	4	3	256	11.04	43	5.95349	0.256744	1.09	300	114	53	1.87	13	4.07692	0.143846	0.69
398	D25	15	2020-08-04	Alcohol	Right	Light OFF	12	eGFP	Paired	2	Right	23.1	3.0178	4	3	448	18.63	92	4.86957	0.2025	1.09	148	75	96	3.36	29	3.31034	0.115862	1.09
399	D28	17	2020-08-04	Alcohol	Left	Light OFF	12	ChR2	Paired	2	Right	26.1	2.60881	4	3	138	9.26	43	3.2093	0.215349	1.06	326	158	41	2.35	12	3.41667	0.195833	0.85
400	D31	18	2020-08-04	Alcohol	Left	Light OFF	12	eGFP	Yoked	2	Right	24.7	3.80684	4	3	281	20.08	93	3.02151	0.213978	1.23	20	76	98	6.78	31	3.16129	0.21871	1.08
401	D34	20	2020-08-04	Alcohol	Left	Light OFF	12	ChR2	Yoked	2	Right	23.8	3.13339	4	3	377	46.4	176	2.14205	0.260284	1.47	136	39	138	16.27	61	2.2623	0.266721	1.2
402	D23	5	2020-08-05	Alcohol	Right	Light OFF	13	eGFP	Paired	2	Right	23.2	1.60721	4	3	150	8.84	35	4.28571	0.252571	1.41	4344	81	0	0	0	0	0	0
403	D24	14	2020-08-05	Alcohol	Left	Light OFF	13	eGFP	Yoked	2	Right	25.7	3.46947	4	3	328	14.04	51	6.43137	0.274118	1.02	786	124	72	2.33	11	6.54545	0.211818	0.51
404	D25	15	2020-08-05	Alcohol	Right	Light OFF	13	eGFP	Paired	2	Right	23.8	3.74644	4	3	215	9.49	73	2.94521	0.122877	0.66	120	94	73	2.75	31	2.35484	0.0887097	0.53
405	D28	17	2020-08-05	Alcohol	Left	Light OFF	13	ChR2	Paired	2	Right	26.5	2.99767	4	3	372	22.44	69	5.3913	0.324783	2.85	198	93	45	4.8	11	4.09091	0.436364	2.85
406	D31	18	2020-08-05	Alcohol	Left	Light OFF	13	eGFP	Yoked	2	Right	24.5	4.03643	4	3	591	32.29	114	5.18421	0.281754	1.61	92	50	253	11.18	61	4.14754	0.183279	1.22
407	D34	20	2020-08-05	Alcohol	Left	Light OFF	13	ChR2	Yoked	2	Right	24.3	4.13637	4	3	249	28.72	114	2.18421	0.242018	2.04	163	60	108	10.99	58	1.86207	0.189483	1.06
408	D23	5	2020-08-06	Alcohol	Right	Light OFF	14	eGFP	Paired	2	Right	23.2	1.95661	4	3	118	4.79	33	3.57576	0.143333	1.22	672	183	1	0.01	1	1	0.01	0.01
409	D24	14	2020-08-06	Alcohol	Left	Light OFF	14	eGFP	Yoked	2	Right	25.7	2.58633	4	3	81	5.13	37	2.18919	0.138378	0.55	268	174	31	1.67	13	2.38462	0.128462	0.54
410	D25	15	2020-08-06	Alcohol	Right	Light OFF	14	eGFP	Paired	2	Right	23.8	3.67833	4	3	410	13.2	78	5.25641	0.167692	0.85	52	89	172	4.66	33	5.21212	0.141212	0.85
411	D28	17	2020-08-06	Alcohol	Left	Light OFF	14	ChR2	Paired	2	Right	26.5	2.93649	4	3	329	14.61	62	5.30645	0.234839	1.15	140	110	105	4.93	19	5.52632	0.259474	1.02
412	D31	18	2020-08-06	Alcohol	Left	Light OFF	14	eGFP	Yoked	2	Right	24.5	1.65427	4	3	176	11.33	53	3.32075	0.213396	0.88	92	101	63	3.81	18	3.5	0.211667	0.84
413	D34	20	2020-08-06	Alcohol	Left	Light OFF	14	ChR2	Yoked	2	Right	24.3	3.33578	4	3	108	20	78	1.38462	0.212692	5.07	194	79	30	8.76	23	1.30435	0.38087	5.07
414	D23	5	2020-08-07	Alcohol	Right	Light OFF	15	eGFP	Paired	4	Right	23.5	4.82907	4	3	487	20.67	88	5.53409	0.234205	1.21	140	119	73	2.46	14	5.21429	0.175714	0.73
415	D24	14	2020-08-07	Alcohol	Left	Light OFF	15	eGFP	Yoked	4	Right	25.9	4.69456	4	3	474	24.85	70	6.77143	0.354571	1.34	406	139	75	4.4	12	6.25	0.366667	1.34
416	D25	15	2020-08-07	Alcohol	Right	Light OFF	15	eGFP	Paired	4	Right	23.6	4.39644	4	3	393	19.46	95	4.13684	0.204526	1.07	116	100	99	4.4	27	3.66667	0.162963	1.07
417	D28	17	2020-08-07	Alcohol	Left	Light OFF	15	ChR2	Paired	4	Right	26.5	5.01651	4	3	561	27.91	93	6.03226	0.299785	1.11	108	137	129	5.07	23	5.6087	0.220435	0.9
418	D31	18	2020-08-07	Alcohol	Left	Light OFF	15	eGFP	Yoked	4	Right	24.6	4.15182	4	3	397	29.85	101	3.93069	0.294158	2.12	144	90	89	5.48	23	3.86957	0.238261	0.77
419	D34	20	2020-08-07	Alcohol	Left	Light OFF	15	ChR2	Yoked	4	Right	24.8	4.57594	4	3	128	16.83	70	1.82857	0.234286	3.63	122	203	34	4.45	22	1.54545	0.202273	1.44
420	D23	5	2020-08-10	Alcohol	Right	Light ON	16	eGFP	Paired	2	Right	23.2	1.46746	4	4	65	3.84	20	3.25	0.1895	1.04	2314	189	0	0	0	0	0	0
421	D24	14	2020-08-10	Alcohol	Left	Light ON	16	eGFP	Yoked	2	Right	26.3	2.71225	4	4	138	8.62	36	3.83333	0.238889	0.85	160	198	20	1	6	3.33333	0.166667	0.47
422	D25	15	2020-08-10	Alcohol	Right	Light ON	16	eGFP	Paired	2	Right	23.4	3.32551	4	4	261	16.27	61	4.27869	0.266721	2.34	120	109	51	2.62	20	2.55	0.131	0.97
423	D28	17	2020-08-10	Alcohol	Left	Light ON	16	ChR2	Paired	2	Right	26.7	3.5824	4	4	211	20.73	59	3.57627	0.336441	1.45	100	117	39	2.84	14	2.78571	0.202857	0.57
424	D31	18	2020-08-10	Alcohol	Left	Light ON	16	eGFP	Yoked	2	Right	24.8	3.13778	4	4	307	11.45	62	4.95161	0.184677	0.58	100	104	101	3.19	16	6.3125	0.199375	0.46
425	D34	20	2020-08-10	Alcohol	Left	Light ON	16	ChR2	Yoked	2	Right	25.1	2.77733	4	4	170	8.18	54	3.14815	0.150926	0.71	128	120	23	1.53	12	1.91667	0.1275	0.56
426	D23	5	2020-08-11	Alcohol	Right	Light ON	17	eGFP	Paired	2	Right	23.2	3.35418	4	4	191	6.12	46	4.15217	0.133043	0.69	414	121	43	0.94	13	3.30769	0.0723077	0.27
427	D24	14	2020-08-11	Alcohol	Left	Light ON	17	eGFP	Yoked	2	Right	26.3	3.88346	4	4	506	41.45	75	6.74667	0.552	1.77	376	92	76	4.77	15	5.06667	0.318	0.98
428	D25	15	2020-08-11	Alcohol	Right	Light ON	17	eGFP	Paired	2	Right	23.4	2.97911	4	4	238	17.22	58	4.10345	0.296034	2.11	20	121	64	2	22	2.90909	0.0909091	1.03
429	D28	17	2020-08-11	Alcohol	Left	Light ON	17	ChR2	Paired	2	Right	26.7	2.42875	4	4	156	15.19	44	3.54545	0.336591	1.09	320	157	7	0.12	5	1.4	0.024	0.06
430	D31	18	2020-08-11	Alcohol	Left	Light ON	17	eGFP	Yoked	2	Right	24.8	3.59538	4	4	297	10.84	66	4.5	0.163333	0.82	60	104	103	2.39	19	5.42105	0.125789	0.38
431	D34	20	2020-08-11	Alcohol	Left	Light ON	17	ChR2	Yoked	2	Right	25.1	3.87535	4	4	182	7.07	57	3.19298	0.123509	0.74	64	102	54	2.7	20	2.7	0.135	0.7
432	D23	5	2020-08-12	Alcohol	Right	Light ON	18	eGFP	Paired	2	Right	23.9	3.66294	4	4	158	6.52	36	4.38889	0.181111	0.73	634	186	27	0.98	5	5.4	0.196	0.62
433	D24	14	2020-08-12	Alcohol	Left	Light ON	18	eGFP	Yoked	2	Right	26.7	4.25031	4	4	370	22.35	71	5.21127	0.314789	1.27	182	96	72	4.95	15	4.8	0.33	0.8
434	D25	15	2020-08-12	Alcohol	Right	Light ON	18	eGFP	Paired	2	Right	23.5	3.44934	4	4	266	22.13	57	4.66667	0.385965	3.29	24	92	106	6.41	26	4.07692	0.246538	1.27
435	D28	17	2020-08-12	Alcohol	Left	Light ON	18	ChR2	Paired	2	Right	26.7	3.40025	4	4	245	18.82	46	5.32609	0.40913	1.22	252	145	61	4.1	10	6.1	0.41	0.94
436	D31	18	2020-08-12	Alcohol	Left	Light ON	18	eGFP	Yoked	2	Right	24.9	3.64605	4	4	233	16.65	56	4.16071	0.296786	1.14	304	109	51	2.62	14	3.64286	0.187143	0.57
437	D34	20	2020-08-12	Alcohol	Left	Light ON	18	ChR2	Yoked	2	Right	24.9	3.38561	4	4	122	8.27	50	2.44	0.1626	0.76	66	142	37	2.13	18	2.05556	0.118333	0.38
438	D23	5	2020-08-13	Alcohol	Right	Light ON	19	eGFP	Paired	2	Right	23.9	4.20559	4	4	330	16.96	55	6	0.306727	1.02	360	120	25	0.76	6	4.16667	0.126667	0.32
439	D24	14	2020-08-13	Alcohol	Left	Light ON	19	eGFP	Yoked	2	Right	26.7	4.5539	4	4	301	25.02	78	3.85897	0.314872	0.96	137	91	70	6.25	20	3.5	0.3125	0.66
440	D25	15	2020-08-13	Alcohol	Right	Light ON	19	eGFP	Paired	2	Right	23.5	3.86326	4	4	246	34.22	53	4.64151	0.639434	2.68	64	136	84	8.64	16	5.25	0.54	2.55
441	D28	17	2020-08-13	Alcohol	Left	Light ON	19	ChR2	Paired	2	Right	26.7	3.33953	4	4	234	19.14	50	4.68	0.3828	1.93	146	127	77	5.99	16	4.8125	0.374375	0.88
442	D31	18	2020-08-13	Alcohol	Left	Light ON	19	eGFP	Yoked	2	Right	24.9	2.92986	4	4	222	8.51	55	4.03636	0.154727	0.66	64	116	31	1.02	10	3.1	0.102	0.62
443	D34	20	2020-08-13	Alcohol	Left	Light ON	19	ChR2	Yoked	2	Right	24.9	3.2554	4	4	139	6.28	49	2.83673	0.128163	0.46	16	104	47	2.25	20	2.35	0.1125	0.41
444	D23	5	2020-08-14	Alcohol	Right	Light ON	20	eGFP	Paired	4	Right	23.5	4.55313	4	4	385	12.44	83	4.63855	0.149518	0.61	1030	134	26	0.65	9	2.88889	0.0722222	0.26
445	D24	14	2020-08-14	Alcohol	Left	Light ON	20	eGFP	Yoked	4	Right	26.7	4.12887	4	4	485	26.82	76	6.38158	0.352895	1.49	378	132	88	3.24	14	6.28571	0.231429	0.86
446	D25	15	2020-08-14	Alcohol	Right	Light ON	20	eGFP	Paired	4	Right	23.7	3.76225	4	4	249	20.65	56	4.44643	0.368571	3.52	150	177	79	7.08	20	3.95	0.354	2.88
447	D28	17	2020-08-14	Alcohol	Left	Light ON	20	ChR2	Paired	4	Right	26.6	4.20534	4	4	239	17.74	67	3.56716	0.264776	0.89	172	133	27	1.98	9	3	0.22	0.45
448	D31	18	2020-08-14	Alcohol	Left	Light ON	20	eGFP	Yoked	4	Right	25.3	3.84472	4	4	555	13.1	75	7.4	0.174667	0.61	378	118	105	1.8	16	6.5625	0.1125	0.32
449	D34	20	2020-08-14	Alcohol	Left	Light ON	20	ChR2	Yoked	4	Right	25.8	3.39319	4	4	295	14.15	98	3.0102	0.142959	1.04	38	141	67	2.08	24	2.79167	0.0866667	0.55
450	D23	5	2020-08-17	Alcohol	Right	Light ON	21	eGFP	Paired	2	Right	23.7	3.0098	4	5	222	5.05	45	4.93333	0.112222	0.38	184	156	57	1.6	14	4.07143	0.114286	0.38
451	D24	14	2020-08-17	Alcohol	Left	Light ON	21	eGFP	Yoked	2	Right	26.9	3.6763	4	5	414	36.84	90	4.6	0.408889	1.5	176	70	152	12.59	27	5.62963	0.466296	1.08
452	D25	15	2020-08-17	Alcohol	Right	Light ON	21	eGFP	Paired	2	Right	23.3	1.53074	4	5	157	10.62	31	5.06452	0.341935	2.22	84	69	100	3.47	19	5.26316	0.182632	1.04
453	D28	17	2020-08-17	Alcohol	Left	Light ON	21	ChR2	Paired	2	Right	27.1	3.23041	4	5	181	11.4	43	4.2093	0.264651	0.89	288	150	37	1.89	11	3.36364	0.171818	0.51
454	D31	18	2020-08-17	Alcohol	Left	Light ON	21	eGFP	Yoked	2	Right	25.4	3.19132	4	5	379	13.39	72	5.26389	0.185972	0.76	212	94	150	5.2	30	5	0.173333	0.59
455	D34	20	2020-08-17	Alcohol	Left	Light ON	21	ChR2	Yoked	2	Right	26.2	3.71265	4	5	174	5.28	58	3	0.0906897	1.38	50	125	84	2.78	27	3.11111	0.102963	1.38
456	D23	5	2020-08-18	Alcohol	Right	Light ON	22	eGFP	Paired	2	Right	23.7	3.55704	4	5	270	6.5	56	4.82143	0.115893	0.72	1470	94	47	0.9	6	7.83333	0.15	0.33
457	D24	14	2020-08-18	Alcohol	Left	Light ON	22	eGFP	Yoked	2	Right	26.9	3.43523	4	5	104	11.26	48	2.16667	0.230417	0.75	234	145	22	1.92	12	1.83333	0.16	0.47
458	D25	15	2020-08-18	Alcohol	Right	Light ON	22	eGFP	Paired	2	Right	23.3	4.17473	4	5	334	24.77	71	4.70423	0.347606	2.45	228	97	146	7.74	34	4.29412	0.227647	0.98
459	D28	17	2020-08-18	Alcohol	Left	Light ON	22	ChR2	Paired	2	Right	27.1	2.81166	4	5	175	16.85	44	3.97727	0.382955	1.13	78	90	93	10.47	27	3.44444	0.387778	1.13
460	D31	18	2020-08-18	Alcohol	Left	Light ON	22	eGFP	Yoked	2	Right	25.4	2.99984	4	5	350	6.64	55	6.36364	0.120727	0.48	160	93	212	3.69	35	6.05714	0.105429	0.3
461	D34	20	2020-08-18	Alcohol	Left	Light ON	22	ChR2	Yoked	2	Right	26.2	2.59885	4	5	91	4.43	40	2.275	0.1105	0.78	66	50	82	3.98	36	2.27778	0.110556	0.78
462	D23	5	2020-08-19	Alcohol	Right	Light ON	23	eGFP	Paired	2	Right	24.1	2.75804	4	5	259	9.93	49	5.28571	0.202449	0.79	480	128	32	0.68	9	3.55556	0.0755556	0.25
463	D24	14	2020-08-19	Alcohol	Left	Light ON	23	eGFP	Yoked	2	Right	26.9	3.19416	4	5	55	9.21	40	1.375	0.22375	1.78	110	167	14	1.73	12	1.16667	0.144167	0.39
464	D25	15	2020-08-19	Alcohol	Right	Light ON	23	eGFP	Paired	2	Right	24.5	1.98513	4	5	192	11.53	38	5.05263	0.303158	2.15	38	92	100	7.39	25	4	0.2956	2.15
465	D28	17	2020-08-19	Alcohol	Left	Light ON	23	ChR2	Paired	2	Right	27.2	3.81456	4	5	197	5.4	46	4.28261	0.116522	0.62	184	123	74	2.41	19	3.89474	0.126842	0.62
466	D31	18	2020-08-19	Alcohol	Left	Light ON	23	eGFP	Yoked	2	Right	26	2.18237	4	5	187	10.86	47	3.97872	0.230426	0.92	224	104	96	6.06	27	3.55556	0.224444	0.92
467	D34	20	2020-08-19	Alcohol	Left	Light ON	23	ChR2	Yoked	2	Right	26.9	2.41069	4	5	140	2.88	34	4.11765	0.0847059	0.73	58	211	118	2.33	30	3.93333	0.0776667	0.73
468	D23	5	2020-08-20	Alcohol	Right	Light ON	24	eGFP	Paired	2	Right	24.1	3.43073	4	5	174	4.82	50	3.48	0.0962	0.59	762	114	25	0.83	10	2.5	0.083	0.33
469	D24	14	2020-08-20	Alcohol	Left	Light ON	24	eGFP	Yoked	2	Right	26.9	4.09817	4	5	581	27.56	88	6.60227	0.312841	0.97	116	79	194	7.64	30	6.46667	0.254667	0.83
470	D25	15	2020-08-20	Alcohol	Right	Light ON	24	eGFP	Paired	2	Right	24.5	3.17621	4	5	204	17.16	47	4.34043	0.364468	3	18	101	82	6.91	21	3.90476	0.329048	2.1
471	D28	17	2020-08-20	Alcohol	Left	Light ON	24	ChR2	Paired	2	Right	27.2	2.80132	4	5	122	4.92	29	4.2069	0.168966	0.49	88	135	44	1.33	9	4.88889	0.147778	0.4
472	D31	18	2020-08-20	Alcohol	Left	Light ON	24	eGFP	Yoked	2	Right	26	2.93061	4	5	246	13.16	53	4.64151	0.248113	1.1	150	101	88	3.57	21	4.19048	0.17	0.69
473	D34	20	2020-08-20	Alcohol	Left	Light ON	24	ChR2	Yoked	2	Right	26.9	2.47096	4	5	122	2.32	35	3.48571	0.066	0.23	18	21	122	2.31	35	3.48571	0.066	0.23
474	D23	5	2020-08-21	Alcohol	Right	Light ON	25	eGFP	Paired	4	Right	23.9	5.63007	4	5	437	11.37	83	5.26506	0.132771	0.5	150	131	152	3.18	31	4.90323	0.102581	0.41
475	D24	14	2020-08-21	Alcohol	Left	Light ON	25	eGFP	Yoked	4	Right	26.9	4.82138	4	5	631	34.72	108	5.84259	0.321296	1.01	164	132	183	7.49	35	5.22857	0.214	0.61
476	D25	15	2020-08-21	Alcohol	Right	Light ON	25	eGFP	Paired	4	Right	23.8	3.88268	4	5	310	17.45	62	5	0.281452	1.58	28	148	103	4.65	24	4.29167	0.19375	1.05
477	D28	17	2020-08-21	Alcohol	Left	Light ON	25	ChR2	Paired	4	Right	27.7	5.67709	4	5	369	10.42	78	4.73077	0.13359	0.65	102	164	66	1.82	19	3.47368	0.0957895	0.28
478	D31	18	2020-08-21	Alcohol	Left	Light ON	25	eGFP	Yoked	4	Right	25.9	4.69456	4	5	495	16.29	90	5.5	0.181	0.69	130	135	201	5.17	34	5.91176	0.152059	0.65
479	D34	20	2020-08-21	Alcohol	Left	Light ON	25	ChR2	Yoked	4	Right	26.9	4.70084	4	5	291	7.1	69	4.21739	0.102899	0.5	56	202	120	2.56	27	4.44444	0.0948148	0.36
480	D23	5	2020-08-24	Alcohol	Right	Light ON	26	eGFP	Paired	2	Right	24.2	3.0816	4	6	227	6.48	50	4.54	0.1282	0.45	468	98	29	0.92	11	2.63636	0.0836364	0.29
481	D24	14	2020-08-24	Alcohol	Left	Light ON	26	eGFP	Yoked	2	Right	27.4	3.49088	4	6	321	14.92	65	4.93846	0.229538	0.84	156	90	90	3.62	20	4.5	0.181	0.53
482	D25	15	2020-08-24	Alcohol	Right	Light ON	26	eGFP	Paired	2	Right	24.3	3.40249	4	6	265	11.44	47	5.6383	0.243191	1.2	168	102	150	5.91	30	5	0.197	0.68
483	D28	17	2020-08-24	Alcohol	Left	Light ON	26	ChR2	Paired	2	Right	27.4	2.7217	4	6	138	3.49	32	4.3125	0.108438	0.81	258	179	27	1.09	10	2.7	0.109	0.81
484	D31	18	2020-08-24	Alcohol	Left	Light ON	26	eGFP	Yoked	2	Right	26.2	3.15575	4	6	551	17.81	84	6.55952	0.212024	0.9	168	68	119	2.34	19	6.26316	0.123158	0.37
485	D34	20	2020-08-24	Alcohol	Left	Light ON	26	ChR2	Yoked	2	Right	27.2	3.57615	4	6	237	5.4	63	3.7619	0.0853968	0.44	80	104	115	2.83	32	3.59375	0.0884375	0.32
486	D23	5	2020-08-25	Alcohol	Right	Light ON	27	eGFP	Paired	2	Right	24.2	2.67965	4	6	172	4.18	41	4.19512	0.100732	0.43	436	143	34	0.76	12	2.83333	0.0633333	0.2
487	D24	14	2020-08-25	Alcohol	Left	Light ON	27	eGFP	Yoked	2	Right	27.4	3.07671	4	6	430	18.68	64	6.71875	0.291875	0.84	300	91	124	3.71	14	8.85714	0.265	0.63
488	D25	15	2020-08-25	Alcohol	Right	Light ON	27	eGFP	Paired	2	Right	24.3	3.93622	4	6	310	10.02	62	5	0.161613	0.96	22	98	128	3.91	30	4.26667	0.130333	0.51
489	D28	17	2020-08-25	Alcohol	Left	Light ON	27	ChR2	Paired	2	Right	27.4	3.55005	4	6	205	6.58	46	4.45652	0.143043	0.41	208	154	66	1.79	17	3.88235	0.105294	0.27
490	D31	18	2020-08-25	Alcohol	Left	Light ON	27	eGFP	Yoked	2	Right	26.2	3.40326	4	6	401	9	59	6.79661	0.152034	0.88	158	121	181	3.42	26	6.96154	0.131538	0.34
491	D34	20	2020-08-25	Alcohol	Left	Light ON	27	ChR2	Yoked	2	Right	27.2	2.3841	4	6	118	3.34	28	4.21429	0.118929	0.54	26	166	63	2.37	18	3.5	0.131667	0.54
492	D23	5	2020-08-26	Alcohol	Right	Light ON	28	eGFP	Paired	2	Right	24.3	2.93549	4	6	187	4.3	35	5.34286	0.121714	0.34	1011	135	17	0.5	5	3.4	0.1	0.19
493	D24	14	2020-08-26	Alcohol	Left	Light ON	28	eGFP	Yoked	2	Right	27.9	3.95128	4	6	453	20.41	82	5.52439	0.242683	0.72	128	79	143	5.74	26	5.5	0.220769	0.68
494	D25	15	2020-08-26	Alcohol	Right	Light ON	28	eGFP	Paired	2	Right	24.5	2.77918	4	6	213	6.59	57	3.73684	0.115088	0.58	206	89	52	1.2	20	2.6	0.06	0.32
495	D28	17	2020-08-26	Alcohol	Left	Light ON	28	ChR2	Paired	2	Right	27.3	3.20675	4	6	224	14.62	56	4	0.261071	1.23	108	121	56	2.72	15	3.73333	0.181333	0.51
496	D31	18	2020-08-26	Alcohol	Left	Light ON	28	eGFP	Yoked	2	Right	26.2	3.15575	4	6	530	14.78	69	7.68116	0.213768	0.69	216	102	232	5.91	30	7.73333	0.197	0.52
497	D34	20	2020-08-26	Alcohol	Left	Light ON	28	ChR2	Yoked	2	Right	26.3	2.7739	4	6	116	5.16	42	2.7619	0.122619	0.46	52	56	93	4	31	3	0.129032	0.43
498	D23	5	2020-08-27	Alcohol	Right	Light ON	29	eGFP	Paired	2	Right	24.3	3.53593	4	6	179	5.01	45	3.97778	0.111333	0.32	1048	133	18	0.54	8	2.25	0.0675	0.18
499	D24	14	2020-08-27	Alcohol	Left	Light ON	29	eGFP	Yoked	2	Right	27.9	3.48643	4	6	477	26.63	84	5.67857	0.317024	1.25	176	76	191	9.47	36	5.30556	0.263056	1.25
500	D25	15	2020-08-27	Alcohol	Right	Light ON	29	eGFP	Paired	2	Right	24.5	2.91152	4	6	281	17.63	53	5.30189	0.332642	1.4	52	72	109	5.07	25	4.36	0.2028	0.94
501	D28	17	2020-08-27	Alcohol	Left	Light ON	29	ChR2	Paired	2	Right	27.3	3.7412	4	6	224	11.62	47	4.76596	0.247234	1.47	110	129	112	5.23	24	4.66667	0.217917	0.7
502	D31	18	2020-08-27	Alcohol	Left	Light ON	29	eGFP	Yoked	2	Right	26.2	3.21763	4	6	340	12.87	62	5.48387	0.207581	0.71	142	96	88	2.65	18	4.88889	0.147222	0.41
503	D34	20	2020-08-27	Alcohol	Left	Light ON	29	ChR2	Yoked	2	Right	26.3	3.14375	4	6	207	4.69	58	3.56897	0.0803448	0.33	208	119	60	1.7	25	2.4	0.068	0.22
504	D23	5	2020-08-28	Alcohol	Right	Light ON	30	eGFP	Paired	4	Right	24.5	4.63197	4	6	444	9.93	67	6.62687	0.147612	0.49	614	195	6	0.05	2	3	0.025	0.04
505	D24	14	2020-08-28	Alcohol	Left	Light ON	30	eGFP	Yoked	4	Right	27.4	5.02923	4	6	108	11.39	56	1.92857	0.203393	0.72	238	209	27	2.29	12	2.25	0.190833	0.71
506	D25	15	2020-08-28	Alcohol	Right	Light ON	30	eGFP	Paired	4	Right	24	3.98542	4	6	400	18.54	70	5.71429	0.264571	1.16	38	81	94	3.97	18	5.22222	0.220556	0.78
507	D28	17	2020-08-28	Alcohol	Left	Light ON	30	ChR2	Paired	4	Right	27.5	4.65723	4	6	356	17.96	66	5.39394	0.27197	1.15	84	195	59	1.69	10	5.9	0.169	0.35
508	D31	18	2020-08-28	Alcohol	Left	Light ON	30	eGFP	Yoked	4	Right	26.2	4.88832	4	6	512	14.83	92	5.56522	0.161196	0.41	112	132	146	3.63	24	6.08333	0.15125	0.38
509	D34	20	2020-08-28	Alcohol	Left	Light ON	30	ChR2	Yoked	4	Right	26.7	4.25031	4	6	144	8.84	62	2.32258	0.133548	0.93	56	145	47	1.26	23	2.04348	0.0547826	0.37
510	E19	1	2020-10-19	Water	Left	Light OFF	1	ChR2	Paired	2	Right	22.8	36.4035	6	1	296	13.72	78	3.79487	0.174359	1.98	608	81	76	4.05	25	3.04	0.162	1.07
511	E21	3	2020-10-19	Water	Left	Light OFF	1	ChR2	Yoked	2	Right	22.1	26.6968	6	1	161	18.14	70	2.3	0.256714	1.78	548	96	24	1.5	8	3	0.1875	0.42
512	E22	4	2020-10-19	Water	Right	Light OFF	1	ChR2	Paired	2	Left	21.7	37.788	6	1	305	30.57	108	2.82407	0.282315	1.77	560	61	27	4.11	14	1.92857	0.293571	1.77
513	E23	7	2020-10-19	Water	Right	Light OFF	1	ChR2	Yoked	2	Left	24.4	29.5082	6	1	513	88.41	150	3.42	0.571467	2.15	1215	40	104	26.66	44	2.36364	0.605909	1.74
514	E24	9	2020-10-19	Alcohol	Left	Light OFF	1	eGFP	Paired	2	Left	23.3	2.85274	6	1	492	45.9	179	2.7486	0.246536	1.52	550	37	62	5.47	22	2.81818	0.248636	0.75
515	E25	10	2020-10-19	Alcohol	Right	Light OFF	1	eGFP	Yoked	2	Right	20.9	2.01679	6	1	187	38.19	132	1.41667	0.275	2.26	248	50	93	21.11	65	1.43077	0.324769	2.26
516	E19	1	2020-10-20	Water	Left	Light OFF	2	ChR2	Paired	2	Right	22.8	26.3158	6	1	340	52.89	120	2.83333	0.416833	2.9	240	56	10	0.35	5	2	0.07	0.17
517	E21	3	2020-10-20	Water	Left	Light OFF	2	ChR2	Yoked	2	Right	22.1	28.0543	6	1	154	20.84	46	3.34783	0.452609	2	132	156	8	0.3	2	4	0.15	0.29
518	E22	4	2020-10-20	Water	Right	Light OFF	2	ChR2	Paired	2	Left	21.7	34.5622	6	1	320	22.96	74	4.32432	0.309459	1.05	126	95	3	0.1	3	1	0.0333333	0.05
519	E23	7	2020-10-20	Water	Right	Light OFF	2	ChR2	Yoked	2	Left	24.4	27.0492	6	1	433	56.61	92	4.70652	0.608478	2.67	150	76	53	10.07	21	2.52381	0.479524	1.52
520	E24	9	2020-10-20	Alcohol	Left	Light OFF	2	eGFP	Paired	2	Left	23.3	3.13105	6	1	486	28.55	133	3.65414	0.21391	1.16	226	51	83	8.67	36	2.30556	0.240833	1.16
521	E25	10	2020-10-20	Alcohol	Right	Light OFF	2	eGFP	Yoked	2	Right	20.9	2.40463	6	1	362	33.51	108	3.35185	0.306944	2.1	432	62	9	0.46	5	1.8	0.092	0.24
522	E19	1	2020-10-21	Water	Left	Light OFF	3	ChR2	Paired	2	Right	23.2	34.4828	6	1	357	36.72	94	3.79787	0.390106	1.78	392	71	25	2.46	10	2.5	0.246	0.75
523	E21	3	2020-10-21	Water	Left	Light OFF	3	ChR2	Yoked	2	Right	22.5	25.3333	6	1	103	12.09	34	3.02941	0.354706	1.64	62	207	4	0.77	3	1.33333	0.256667	0.57
524	E22	4	2020-10-21	Water	Right	Light OFF	3	ChR2	Paired	2	Left	21.9	32.8767	6	1	162	8.35	42	3.85714	0.19881	0.81	1421	118	35	2.71	9	3.88889	0.301111	0.81
525	E23	7	2020-10-21	Water	Right	Light OFF	3	ChR2	Yoked	2	Left	24.2	18.595	6	1	231	28.02	51	4.52941	0.54549	2.33	198	124	28	2.06	6	4.66667	0.343333	0.72
526	E24	9	2020-10-21	Alcohol	Left	Light OFF	3	eGFP	Paired	2	Left	23.8	2.7928	6	1	399	25.75	96	4.15625	0.264792	2.3	92	51	128	6.79	36	3.55556	0.188611	0.64
527	E25	10	2020-10-21	Alcohol	Right	Light OFF	3	eGFP	Yoked	2	Right	21.3	3.88172	6	1	283	10.12	68	4.16176	0.146324	0.83	560	99	15	0.44	7	2.14286	0.0628571	0.16
528	E19	1	2020-10-22	Water	Left	Light OFF	4	ChR2	Paired	2	Right	23.2	34.4828	6	1	332	28.37	83	4	0.341205	1.38	84	85	23	1.9	14	1.64286	0.135714	1.07
529	E21	3	2020-10-22	Water	Left	Light OFF	4	ChR2	Yoked	2	Right	22.5	32	6	1	117	11.67	39	3	0.292308	1.5	1421	151	3	0.6	2	1.5	0.3	0.3
530	E22	4	2020-10-22	Water	Right	Light OFF	4	ChR2	Paired	2	Left	21.9	30.137	6	1	159	11.05	36	4.41667	0.305556	2.02	2036	143	0	0	0	0	0	0
531	E23	7	2020-10-22	Water	Right	Light OFF	4	ChR2	Yoked	2	Left	24.2	23.9669	6	1	240	35	47	5.10638	0.744255	2.74	1358	116	12	1.27	3	4	0.423333	0.63
532	E24	9	2020-10-22	Alcohol	Left	Light OFF	4	eGFP	Paired	2	Left	23.8	3.47398	6	1	421	17.08	86	4.89535	0.198372	1.08	342	80	91	4.06	19	4.78947	0.213684	1.08
533	E25	10	2020-10-22	Alcohol	Right	Light OFF	4	eGFP	Yoked	2	Right	21.3	2.66392	6	1	155	3.41	34	4.55882	0.0997059	0.22	1236	160	6	0.16	2	3	0.08	0.1
534	E19	1	2020-10-23	Water	Left	Light OFF	5	ChR2	Paired	4	Right	23.9	76.9874	6	1	600	23.96	129	4.65116	0.185504	1.7	144	108	6	0.44	4	1.5	0.11	0.2
535	E21	3	2020-10-23	Water	Left	Light OFF	5	ChR2	Yoked	4	Right	23	65.2174	6	1	298	33.7	97	3.07216	0.332268	1.87	132	144	2	0.02	1	2	0.02	0.02
536	E22	4	2020-10-23	Water	Right	Light OFF	5	ChR2	Paired	4	Left	22.5	66.2222	6	1	251	19.71	74	3.39189	0.264459	2.09	195	186	16	4.29	6	2.66667	0.715	2.09
537	E23	7	2020-10-23	Water	Right	Light OFF	5	ChR2	Yoked	4	Left	25.2	57.9365	6	1	641	54.03	111	5.77477	0.486757	1.87	152	125	2	0.05	2	1	0.025	0.05
538	E24	9	2020-10-23	Alcohol	Left	Light OFF	5	eGFP	Paired	4	Left	23.8	1.77105	6	1	256	8.21	45	5.68889	0.182	0.49	5244	204	0	0	0	0	0	0
539	E25	10	2020-10-23	Alcohol	Right	Light OFF	5	eGFP	Yoked	4	Right	21.7	7.02266	6	1	379	9.58	75	5.05333	0.124533	0.56	226	167	45	1.27	7	6.42857	0.181429	0.4
540	E19	1	2020-10-26	Water	Left	Light OFF	6	ChR2	Paired	2	Right	23.5	41.7021	6	2	349	28.68	76	4.59211	0.374605	2.29	986	76	32	1.55	8	4	0.19375	0.41
541	E21	3	2020-10-26	Water	Left	Light OFF	6	ChR2	Yoked	2	Right	22.8	39.4737	6	2	175	11.66	58	3.01724	0.19931	0.97	40	122	6	0.22	3	2	0.0733333	0.13
542	E22	4	2020-10-26	Water	Right	Light OFF	6	ChR2	Paired	2	Left	22.1	24.4344	6	2	54	4.8	20	2.7	0.24	1.05	2244	232	0	0	0	0	0	0
543	E23	7	2020-10-26	Water	Right	Light OFF	6	ChR2	Yoked	2	Left	25	28.8	6	2	237	51.07	53	4.4717	0.955283	3.25	1486	105	51	5.14	9	5.66667	0.571111	1.07
544	E24	9	2020-10-26	Alcohol	Left	Light OFF	6	eGFP	Paired	2	Left	24.5	2.5145	6	2	215	7.96	50	4.3	0.1592	1.38	100	135	41	2.46	16	2.5625	0.15375	1.38
545	E25	10	2020-10-26	Alcohol	Right	Light OFF	6	eGFP	Yoked	2	Right	22	3.46345	6	2	179	3.93	31	5.77419	0.123871	0.7	758	194	12	0.82	3	4	0.273333	0.7
546	E19	1	2020-10-27	Water	Left	Light OFF	7	ChR2	Paired	2	Right	23.5	31.9149	6	2	273	10.3	61	4.47541	0.168852	0.7	168	113	51	0.78	14	3.64286	0.0557143	0.14
547	E21	3	2020-10-27	Water	Left	Light OFF	7	ChR2	Yoked	2	Right	22.8	32.4561	6	2	177	11.25	54	3.27778	0.208333	0.99	1062	102	23	1.76	10	2.3	0.176	0.51
548	E22	4	2020-10-27	Water	Right	Light OFF	7	ChR2	Paired	2	Left	22.1	20.8145	6	2	94	5.53	28	3.35714	0.1975	0.84	776	161	17	1.62	6	2.83333	0.27	0.84
549	E23	7	2020-10-27	Water	Right	Light OFF	7	ChR2	Yoked	2	Left	25	34.8	6	2	288	44.79	61	4.72131	0.720164	3.22	196	114	60	7.1	12	5	0.591667	2.26
550	E24	9	2020-10-27	Alcohol	Left	Light OFF	7	eGFP	Paired	2	Left	24.5	0.463197	6	2	73	1.89	18	4.05556	0.105	0.26	222	384	2	0.03	1	2	0.03	0.03
551	E25	10	2020-10-27	Alcohol	Right	Light OFF	7	eGFP	Yoked	2	Right	22	4.05297	6	2	200	6.75	42	4.7619	0.160714	2.7	1519	127	28	0.93	7	4	0.132857	0.36
552	E19	1	2020-10-28	Water	Left	Light OFF	8	ChR2	Paired	2	Right	24	37.9167	6	2	245	11.52	54	4.53704	0.210926	1.27	76	119	4	0.24	3	1.33333	0.08	0.13
553	E21	3	2020-10-28	Water	Left	Light OFF	8	ChR2	Yoked	2	Right	23.5	36.1702	6	2	205	10.17	67	3.0597	0.151642	0.71	751	94	17	0.56	8	2.125	0.07	0.27
554	E22	4	2020-10-28	Water	Right	Light OFF	8	ChR2	Paired	2	Left	22.3	18.8341	6	2	68	2.73	16	4.25	0.170625	1.56	1775	348	13	1.7	3	4.33333	0.566667	1.56
555	E23	7	2020-10-28	Water	Right	Light OFF	8	ChR2	Yoked	2	Left	25.8	36.4341	6	2	208	61.31	56	3.71429	1.02839	3.18	162	127	13	2.8	5	2.6	0.56	2.14
556	E24	9	2020-10-28	Alcohol	Left	Light OFF	8	eGFP	Paired	2	Left	24.8	2.28797	6	2	206	5.53	37	5.56757	0.148919	0.52	1287	146	3	0.06	2	1.5	0.03	0.05
557	E25	10	2020-10-28	Alcohol	Right	Light OFF	8	eGFP	Yoked	2	Right	22.2	3.8704	6	2	231	4.95	45	5.13333	0.11	0.42	611	142	22	0.43	4	5.5	0.1075	0.17
558	E19	1	2020-10-29	Water	Left	Light OFF	9	ChR2	Paired	2	Right	24	38.75	6	2	213	7.36	54	3.94444	0.135741	1.85	34	133	23	0.98	6	3.83333	0.163333	0.6
559	E21	3	2020-10-29	Water	Left	Light OFF	9	ChR2	Yoked	2	Right	23.5	39.5745	6	2	180	10.32	51	3.52941	0.187647	0.67	44	140	30	1.49	7	4.28571	0.212857	0.56
560	E22	4	2020-10-29	Water	Right	Light OFF	9	ChR2	Paired	2	Left	22.3	25.5605	6	2	150	2.93	35	4.28571	0.0837143	0.35	358	196	4	0.09	1	4	0.09	0.09
561	E23	7	2020-10-29	Water	Right	Light OFF	9	ChR2	Yoked	2	Left	25.8	45.3488	6	2	380	93.66	119	3.19328	0.772269	2.44	30	59	36	7.68	16	2.25	0.48	1.36
562	E24	9	2020-10-29	Alcohol	Left	Light OFF	9	eGFP	Paired	2	Left	24.8	1.04593	6	2	148	4.86	31	4.77419	0.155161	0.43	1267	181	1	0.04	1	1	0.04	0.04
563	E25	10	2020-10-29	Alcohol	Right	Light OFF	9	eGFP	Yoked	2	Right	22.2	3.21317	6	2	284	7.87	43	6.60465	0.183023	0.54	414	124	74	1.34	12	6.16667	0.111667	0.22
564	E19	1	2020-10-30	Water	Left	Light OFF	10	ChR2	Paired	4	Right	24.2	80.1653	6	2	373	11.01	86	4.33721	0.127907	0.94	246	143	43	1.11	10	4.3	0.111	0.4
565	E21	3	2020-10-30	Water	Left	Light OFF	10	ChR2	Yoked	4	Right	23.6	51.6949	6	2	181	9.39	70	2.58571	0.132714	0.75	380	155	20	1.56	12	1.66667	0.13	0.75
566	E22	4	2020-10-30	Water	Right	Light OFF	10	ChR2	Paired	4	Left	23	58.6957	6	2	203	6.98	59	3.44068	0.118305	1.3	2636	184	0	0	0	0	0	0
567	E23	7	2020-10-30	Water	Right	Light OFF	10	ChR2	Yoked	4	Left	26.1	56.705	6	2	605	71.16	138	4.38406	0.515217	3.23	250	86	9	0.86	4	2.25	0.215	0.7
568	E24	9	2020-10-30	Alcohol	Left	Light OFF	10	eGFP	Paired	4	Left	25	3.43692	6	2	433	15.64	73	5.93151	0.214247	0.77	656	164	1	0.01	1	1	0.01	0.01
569	E25	10	2020-10-30	Alcohol	Right	Light OFF	10	eGFP	Yoked	4	Right	22.7	5.42777	6	2	436	9.13	57	7.64912	0.160175	0.48	102	190	41	0.75	7	5.85714	0.107143	0.2
570	E19	1	2020-11-02	Water	Left	Light OFF	11	ChR2	Paired	2	Right	24.5	42.0408	6	3	115	8.61	43	2.67442	0.200233	1.74	48	154	21	2.89	7	3	0.412857	1.74
571	E21	3	2020-11-02	Water	Left	Light OFF	11	ChR2	Yoked	2	Right	23.4	47.4359	6	3	192	7.2	73	2.63014	0.0968493	0.34	158	96	35	1.12	11	3.18182	0.101818	0.31
572	E22	4	2020-11-02	Water	Right	Light OFF	11	ChR2	Paired	2	Left	22.5	29.7778	6	3
573	E23	7	2020-11-02	Water	Right	Light OFF	11	ChR2	Yoked	2	Left	26.3	28.8973	6	3	199	25.91	58	3.43103	0.446034	2.51	1256	103	6	0.59	2	3	0.295	0.53
574	E24	9	2020-11-02	Alcohol	Left	Light OFF	11	eGFP	Paired	2	Left	24.9	2.4741	6	3	272	10.11	40	6.8	0.2525	0.82	754	145	30	1.01	6	5	0.168333	0.32
575	E25	10	2020-11-02	Alcohol	Right	Light OFF	11	eGFP	Yoked	2	Right	23	4.22919	6	3	280	4.41	47	5.95745	0.0938298	0.22	372	133	68	1.26	12	5.66667	0.105	0.21
576	E19	1	2020-11-03	Water	Left	Light OFF	12	ChR2	Paired	2	Right	24.5	31.4286	6	3	102	5.88	36	2.83333	0.163056	0.95	144	159	28	2.12	13	2.15385	0.163077	0.83
577	E21	3	2020-11-03	Water	Left	Light OFF	12	ChR2	Yoked	2	Right	23.4	44.4444	6	3	191	9.58	63	3.03175	0.151905	1.7	33	109	33	3.27	12	2.75	0.2725	1.7
578	E22	4	2020-11-03	Water	Right	Light OFF	12	ChR2	Paired	2	Left	22.5	32.4444	6	3	115	2.74	32	3.59375	0.085625	0.38	1328	189	9	0.44	3	3	0.146667	0.38
579	E23	7	2020-11-03	Water	Right	Light OFF	12	ChR2	Yoked	2	Left	26.3	35.7414	6	3	288	39.95	83	3.46988	0.468675	2.55	224	84	50	6.45	17	2.94118	0.379412	1.35
580	E24	9	2020-11-03	Alcohol	Left	Light OFF	12	eGFP	Paired	2	Left	24.9	1.10684	6	3	92	3.21	22	4.18182	0.145909	0.95	110	172	46	1.13	13	3.53846	0.0869231	0.42
581	E25	10	2020-11-03	Alcohol	Right	Light OFF	12	eGFP	Yoked	2	Right	23	4.08821	6	3	205	4.22	39	5.25641	0.107436	1.1	14	185	53	1.84	11	4.81818	0.167273	1.1
582	E19	1	2020-11-04	Water	Left	Light OFF	13	ChR2	Paired	2	Right	24.7	39.6761	6	3	313	15.22	80	3.9125	0.19025	0.93	16	85	20	0.79	11	1.81818	0.0718182	0.21
583	E21	3	2020-11-04	Water	Left	Light OFF	13	ChR2	Yoked	2	Right	23.8	45.7983	6	3	164	6.92	61	2.68852	0.113115	0.73	62	117	62	2.15	22	2.81818	0.0977273	0.42
584	E22	4	2020-11-04	Water	Right	Light OFF	13	ChR2	Paired	2	Left	22.7	31.7181	6	3	90	6.8	36	2.5	0.184444	1.45	42	204	13	0.49	6	2.16667	0.0816667	0.3
585	E23	7	2020-11-04	Water	Right	Light OFF	13	ChR2	Yoked	2	Left	26.5	37.3585	6	3	387	29.45	81	4.77778	0.36321	1.19	1280	65	80	4.84	14	5.71429	0.345714	0.82
586	E24	9	2020-11-04	Alcohol	Left	Light OFF	13	eGFP	Paired	2	Left	25.3	1.15341	6	3	97	2.25	17	5.70588	0.131765	0.34	32	424	96	2.19	16	6	0.136875	0.34
587	E25	10	2020-11-04	Alcohol	Right	Light OFF	13	eGFP	Yoked	2	Right	23.2	3.6337	6	3	226	4.18	44	5.13636	0.095	0.37	28	100	87	1.25	16	5.4375	0.078125	0.16
588	E19	1	2020-11-05	Water	Left	Light OFF	14	ChR2	Paired	2	Right	24.7	34.8178	6	3	67	6.63	36	1.86111	0.180278	0.97	50	196	15	1.23	7	2.14286	0.175714	0.72
589	E21	3	2020-11-05	Water	Left	Light OFF	14	ChR2	Yoked	2	Right	23.8	47.479	6	3	180	9.16	64	2.8125	0.142813	0.97	240	109	27	1.97	12	2.25	0.164167	0.46
590	E22	4	2020-11-05	Water	Right	Light OFF	14	ChR2	Paired	2	Left	22.7	34.3612	6	3
591	E23	7	2020-11-05	Water	Right	Light OFF	14	ChR2	Yoked	2	Left	26.5	27.5472	6	3	174	10.72	52	3.34615	0.206154	0.95	54	135	18	1.45	6	3	0.241667	0.93
592	E24	9	2020-11-05	Alcohol	Left	Light OFF	14	eGFP	Paired	2	Left	25.3	1.40973	6	3	147	3.88	26	5.65385	0.149231	0.83	52	209	40	0.63	7	5.71429	0.09	0.16
593	E25	10	2020-11-05	Alcohol	Right	Light OFF	14	eGFP	Yoked	2	Right	23.2	3.77346	6	3	194	6.54	41	4.73171	0.159512	0.59	52	176	58	1.94	17	3.41176	0.114118	0.37
594	E19	1	2020-11-06	Water	Left	Light OFF	15	ChR2	Paired	4	Right	25.3	73.1225	6	3	370	12.74	92	4.02174	0.138261	2.13	1578	133	14	0.56	5	2.8	0.112	0.39
595	E21	3	2020-11-06	Water	Left	Light OFF	15	ChR2	Yoked	4	Right	24.3	72.428	6	3	305	15.9	116	2.62931	0.134655	1.16	388	111	16	0.38	7	2.28571	0.0542857	0.14
596	E22	4	2020-11-06	Water	Right	Light OFF	15	ChR2	Paired	4	Left	22.9	58.952	6	3	300	6.7	77	3.8961	0.0866234	0.37	970	174	8	0.24	3	2.66667	0.08	0.19
598	E24	9	2020-11-06	Alcohol	Left	Light OFF	15	eGFP	Paired	4	Left	23.6	4.73992	6	3	439	9.37	64	6.85938	0.146406	0.47	14	219	352	7.46	48	7.33333	0.155417	0.47
599	E25	10	2020-11-06	Alcohol	Right	Light OFF	15	eGFP	Yoked	4	Right	21.2	4.58827	6	3	162	2.64	44	3.68182	0.06	0.25	6	263	139	2.24	36	3.86111	0.0622222	0.25
600	E19	1	2020-11-09	Water	Left	Light ON	16	ChR2	Paired	2	Right	25	30.4	6	4	118	2.86	41	2.87805	0.0697561	0.5	206	165	18	0.69	6	3	0.115	0.5
601	E21	3	2020-11-09	Water	Left	Light ON	16	ChR2	Yoked	2	Right	23.8	34.0336	6	4	184	6.79	50	3.68	0.131	0.61	396	134	15	0.49	6	2.5	0.0816667	0.24
602	E22	4	2020-11-09	Water	Right	Light ON	16	ChR2	Paired	2	Left	23.1	27.7056	6	4	80	3.5	25	3.2	0.14	0.43	362	274	1	0.02	1	1	0.02	0.02
603	E23	7	2020-11-09	Water	Right	Light ON	16	ChR2	Yoked	2	Left	26.9	32.7138	6	4	161	10.69	63	2.55556	0.169365	0.69	82	111	34	2.3	17	2	0.135294	0.59
604	E24	9	2020-11-09	Alcohol	Left	Light ON	16	eGFP	Paired	2	Left	25.6	1.32988	6	4	39	2.95	14	2.78571	0.205	0.82	254	381	2	0.06	2	1	0.03	0.06
605	E25	10	2020-11-09	Alcohol	Right	Light ON	16	eGFP	Yoked	2	Right	23.4	2.56342	6	4	118	1.99	26	4.53846	0.0765385	0.2	2478	168	0	0	0	0	0	0
606	E19	1	2020-11-10	Water	Left	Light ON	17	ChR2	Paired	2	Right	25	41.6	6	4	223	3.85	51	4.37255	0.0735294	0.41	1421	112	40	1.04	11	3.63636	0.0945455	0.41
607	E21	3	2020-11-10	Water	Left	Light ON	17	ChR2	Yoked	2	Right	23.8	41.5966	6	4	167	10.16	64	2.60938	0.141563	1.5	90	112	20	3.6	12	1.66667	0.3	1.5
608	E22	4	2020-11-10	Water	Right	Light ON	17	ChR2	Paired	2	Left	23.1	32.4675	6	4	85	4.25	24	3.54167	0.175833	0.61	1550	234	16	0.99	5	3.2	0.198	0.61
609	E23	7	2020-11-10	Water	Right	Light ON	17	ChR2	Yoked	2	Left	26.9	33.0855	6	4	252	14.96	65	3.87692	0.228923	0.87	30	104	26	1.65	12	2.16667	0.1375	0.48
610	E24	9	2020-11-10	Alcohol	Left	Light ON	17	eGFP	Paired	2	Left	25.6	1.32988	6	4	130	3.58	26	5	0.137308	0.79	56	266	16	1.06	8	2	0.1325	0.79
611	E25	10	2020-11-10	Alcohol	Right	Light ON	17	eGFP	Yoked	2	Right	23.4	3.87977	6	4	207	3.23	43	4.81395	0.0751163	0.18	106	147	25	0.42	6	4.16667	0.07	0.15
612	E19	1	2020-11-11	Water	Left	Light ON	18	ChR2	Paired	2	Right	25.6	39.4531	6	4	143	12.24	42	3.40476	0.29	1.8	272	167	5	0.38	3	1.66667	0.126667	0.18
613	E21	3	2020-11-11	Water	Left	Light ON	18	ChR2	Yoked	2	Right	24.2	32.2314	6	4	124	3.68	42	2.95238	0.087381	0.47	302	167	22	0.49	10	2.2	0.049	0.16
614	E22	4	2020-11-11	Water	Right	Light ON	18	ChR2	Paired	2	Left	23.4	31.6239	6	4	104	4.26	29	3.58621	0.115517	0.43	1820	174	0	0	0	0	0	0
615	E23	7	2020-11-11	Water	Right	Light ON	18	ChR2	Yoked	2	Left	27.1	29.5203	6	4	278	15.52	69	4.02899	0.224348	1.14	210	94	11	0.68	4	2.75	0.17	0.51
616	E24	9	2020-11-11	Alcohol	Left	Light ON	18	eGFP	Paired	2	Left	25.5	1.8437	6	4	195	5.59	35	5.57143	0.159714	0.81	195	193	89	2.16	16	5.5625	0.135	0.61
617	E25	10	2020-11-11	Alcohol	Right	Light ON	18	eGFP	Yoked	2	Right	23.9	3.25594	6	4	211	3.58	43	4.90698	0.0827907	0.23	158	156	25	0.5	5	5	0.1	0.2
618	E19	1	2020-11-12	Water	Left	Light ON	19	ChR2	Paired	2	Right	25.6	30.4688	6	4	60	3.15	23	2.6087	0.13087	0.33	400	289	5	0.12	2	2.5	0.06	0.11
619	E21	3	2020-11-12	Water	Left	Light ON	19	ChR2	Yoked	2	Right	24.2	27.686	6	4	113	4.77	37	3.05405	0.128919	0.68	76	188	4	0.08	3	1.33333	0.0266667	0.04
620	E22	4	2020-11-12	Water	Right	Light ON	19	ChR2	Paired	2	Left	23.4	25.2137	6	4	96	2.33	30	3.2	0.0776667	0.21	1126	195	5	0.18	2	2.5	0.09	0.1
621	E23	7	2020-11-12	Water	Right	Light ON	19	ChR2	Yoked	2	Left	27.1	25.8303	6	4	386	27.28	80	4.825	0.332625	1.32	78	88	56	4.33	15	3.73333	0.288667	0.79
622	E24	9	2020-11-12	Alcohol	Left	Light ON	19	eGFP	Paired	2	Left	25.5	1.46225	6	4	95	4.38	21	4.52381	0.208571	0.78	206	348	12	0.5	3	4	0.166667	0.35
623	E25	10	2020-11-12	Alcohol	Right	Light ON	19	eGFP	Yoked	2	Right	23.9	3.05245	6	4	204	4.41	38	5.36842	0.116053	0.29	120	177	53	1.28	10	5.3	0.128	0.28
624	E19	1	2020-11-13	Water	Left	Light ON	20	ChR2	Paired	4	Right	25.6	66.7969	6	4	211	12.21	78	2.70513	0.156538	0.61	60	183	9	0.3	4	2.25	0.075	0.11
625	E21	3	2020-11-13	Water	Left	Light ON	20	ChR2	Yoked	4	Right	24.8	76.2097	6	4	147	19.94	68	2.16176	0.283235	1.67	42	209	17	2.13	8	2.125	0.26625	0.59
626	E22	4	2020-11-13	Water	Right	Light ON	20	ChR2	Paired	4	Left	23.7	72.5738	6	4	397	8.73	96	4.13542	0.0904167	0.46	502	144	26	1.08	8	3.25	0.135	0.41
627	E23	7	2020-11-13	Water	Right	Light ON	20	ChR2	Yoked	4	Left	27.1	63.4686	6	4	1028	51.28	197	5.21827	0.258934	1.09	28	72	96	3.83	20	4.8	0.1915	0.62
628	E24	9	2020-11-13	Alcohol	Left	Light ON	20	eGFP	Paired	4	Left	25.6	3.73633	6	4	316	9.41	52	6.07692	0.180962	1.03	26	274	35	0.51	6	5.83333	0.085	0.13
629	E25	10	2020-11-13	Alcohol	Right	Light ON	20	eGFP	Yoked	4	Right	24	6.4172	6	4	71	1.94	16	4.4375	0.12125	0.49	52	167	68	1.86	15	4.53333	0.124	0.49
630	E19	1	2020-11-16	Water	Left	Light ON	21	ChR2	Paired	2	Right	25.8	34.4961	6	5	125	10.07	49	2.55102	0.20551	0.58	24	139	27	2.9	14	1.92857	0.207143	0.58
631	E21	3	2020-11-16	Water	Left	Light ON	21	ChR2	Yoked	2	Right	24.5	37.1429	6	5	128	4.2	43	2.97674	0.0969767	0.42	196	146	36	1.1	14	2.57143	0.0785714	0.29
632	E22	4	2020-11-16	Water	Right	Light ON	21	ChR2	Paired	2	Left	23.3	28.7554	6	5	33	3.96	17	1.94118	0.232353	0.52	1014	349	13	0.82	4	3.25	0.205	0.41
633	E23	7	2020-11-16	Water	Right	Light ON	21	ChR2	Yoked	2	Left	27.5	36.3636	6	5	367	30.42	96	3.82292	0.316458	1.62	136	73	83	9.78	29	2.86207	0.337241	1.58
634	E24	9	2020-11-16	Alcohol	Left	Light ON	21	eGFP	Paired	2	Left	25.5	1.97086	6	5	18	1.69	9	2	0.185556	0.42	192	791	5	0.44	2	2.5	0.22	0.42
635	E25	10	2020-11-16	Alcohol	Right	Light ON	21	eGFP	Yoked	2	Right	24	4.12052	6	5	124	3.93	35	3.54286	0.112	0.46	104	179	39	0.98	11	3.54545	0.0890909	0.34
636	E19	1	2020-11-17	Water	Left	Light ON	22	ChR2	Paired	2	Right	25.8	34.4961	6	5	249	5.24	51	4.88235	0.102353	0.45	1940	92	0	0	0	0	0	0
637	E21	3	2020-11-17	Water	Left	Light ON	22	ChR2	Yoked	2	Right	24.5	37.9592	6	5	133	8.08	53	2.50943	0.151887	0.93	38	131	22	1.07	12	1.83333	0.0891667	0.35
638	E22	4	2020-11-17	Water	Right	Light ON	22	ChR2	Paired	2	Left	23.3	36.9099	6	5	101	4	36	2.80556	0.111111	0.43	292	193	31	1.22	7	4.42857	0.174286	0.4
639	E23	7	2020-11-17	Water	Right	Light ON	22	ChR2	Yoked	2	Left	27.5	32.3636	6	5	325	14.99	93	3.49462	0.156452	0.72	182	73	22	0.84	12	1.83333	0.07	0.43
640	E24	9	2020-11-17	Alcohol	Left	Light ON	22	eGFP	Paired	2	Left	25.5	1.90728	6	5	22	2.32	10	2.2	0.232	0.73	3328	407	0	0	0	0	0	0
641	E25	10	2020-11-17	Alcohol	Right	Light ON	22	eGFP	Yoked	2	Right	24	3.44503	6	5	232	5.22	47	4.93617	0.111064	0.43	88	149	52	1.07	14	3.71429	0.0764286	0.4
642	E19	1	2020-11-18	Water	Left	Light ON	23	ChR2	Paired	2	Right	26	34.6154	6	5	68	11.4	34	2	0.335	0.87	192	206	13	0.82	4	3.25	0.205	0.39
643	E21	3	2020-11-18	Water	Left	Light ON	23	ChR2	Yoked	2	Right	24.9	33.3333	6	5	94	5.5	37	2.54054	0.143243	0.6	66	189	26	1.4	14	1.85714	0.1	0.37
644	E22	4	2020-11-18	Water	Right	Light ON	23	ChR2	Paired	2	Left	23.9	26.3598	6	5	130	2.74	29	4.48276	0.0944828	0.27	202	247	2	0.03	1	2	0.03	0.03
645	E23	7	2020-11-18	Water	Right	Light ON	23	ChR2	Yoked	2	Left	27.8	33.8129	6	5	206	12.51	71	2.90141	0.175915	0.69	88	95	44	2.99	12	3.66667	0.249167	0.69
646	E24	9	2020-11-18	Alcohol	Left	Light ON	23	eGFP	Paired	2	Left	25.7	2.46017	6	5	176	11.27	31	5.67742	0.35	0.92	572	217	50	2.39	7	7.14286	0.341429	0.65
647	E25	10	2020-11-18	Alcohol	Right	Light ON	23	eGFP	Yoked	2	Right	24.5	3.11004	6	5	210	4.01	38	5.52632	0.104474	0.28	164	164	77	1.37	14	5.5	0.0978571	0.22
648	E19	1	2020-11-19	Water	Left	Light ON	24	ChR2	Paired	2	Right	26	29.6154	6	5	228	3.79	48	4.75	0.0789583	0.49	2602	87	0	0	0	0	0	0
649	E21	3	2020-11-19	Water	Left	Light ON	24	ChR2	Yoked	2	Right	24.9	30.5221	6	5	99	2.91	31	3.19355	0.093871	0.43	74	194	14	0.51	7	2	0.0728571	0.36
650	E22	4	2020-11-19	Water	Right	Light ON	24	ChR2	Paired	2	Left	23.9	14.2259	6	5	36	1.07	12	3	0.0891667	0.23	630	595	13	0.3	3	4.33333	0.1	0.11
651	E23	7	2020-11-19	Water	Right	Light ON	24	ChR2	Yoked	2	Left	27.8	29.4964	6	5	216	13.78	67	3.22388	0.204925	0.63	164	99	25	1.78	8	3.125	0.2225	0.51
652	E24	9	2020-11-19	Alcohol	Left	Light ON	24	eGFP	Paired	2	Left	25.7	1.38779	6	5	141	2.62	23	6.13043	0.112174	0.29	258	261	21	0.37	5	4.2	0.074	0.13
653	E25	10	2020-11-19	Alcohol	Right	Light ON	24	eGFP	Yoked	2	Right	24.5	3.97026	6	5	294	4.83	53	5.54717	0.0903774	0.25	84	132	58	1.08	16	3.625	0.0675	0.18
654	E19	1	2020-11-20	Water	Left	Light ON	25	ChR2	Paired	4	Right	26.5	70.1887	6	5	732	14.35	134	5.46269	0.106866	0.94	54	106	72	1.37	14	5.14286	0.0978571	0.42
655	E21	3	2020-11-20	Water	Left	Light ON	25	ChR2	Yoked	4	Right	25.2	59.5238	6	5	254	10.92	93	2.73118	0.114516	0.68	40	135	11	0.23	6	1.83333	0.0383333	0.15
656	E22	4	2020-11-20	Water	Right	Light ON	25	ChR2	Paired	4	Left	24.5	59.5918	6	5	276	9.58	87	3.17241	0.108621	0.64	212	161	2	0.02	1	2	0.02	0.02
657	E23	7	2020-11-20	Water	Right	Light ON	25	ChR2	Yoked	4	Left	28.3	65.0177	6	5	633	45.86	164	3.85976	0.277622	1.58	182	86	105	7.4	27	3.88889	0.274074	1.58
658	E24	9	2020-11-20	Alcohol	Left	Light ON	25	eGFP	Paired	4	Left	26.1	4.34802	6	5	312	5.49	51	6.11765	0.107647	0.36	38	274	23	0.38	5	4.6	0.076	0.16
659	E25	10	2020-11-20	Alcohol	Right	Light ON	25	eGFP	Yoked	4	Right	24.7	5.51335	6	5	392	5.71	72	5.44444	0.0788889	0.39	180	140	39	0.63	9	4.33333	0.07	0.18
660	E19	1	2020-11-23	Water	Left	Light ON	26	ChR2	Paired	2	Right	25.9	35.9073	6	6	215	3.79	53	4.0566	0.0713208	0.46	178	126	69	1.19	18	3.83333	0.0661111	0.25
661	E21	3	2020-11-23	Water	Left	Light ON	26	ChR2	Yoked	2	Right	25.1	28.6853	6	6	120	6.58	44	2.72727	0.139318	2.68	12	162	12	3.17	6	2	0.528333	2.68
662	E22	4	2020-11-23	Water	Right	Light ON	26	ChR2	Paired	2	Left	23.9	36.4017	6	6	10	0.24	3	3.33333	0.08	0.16	718	1601	4	0.08	2	2	0.04	0.07
663	E23	7	2020-11-23	Water	Right	Light ON	26	ChR2	Yoked	2	Left	28	36.7857	6	6	172	7.95	69	2.49275	0.112029	0.38	50	104	24	1.22	14	1.71429	0.0871429	0.29
664	E24	9	2020-11-23	Alcohol	Left	Light ON	26	eGFP	Paired	2	Left	26.1	2.17401	6	6	278	8.08	42	6.61905	0.192381	0.66	76	95	133	4.05	22	6.04545	0.184091	0.66
665	E25	10	2020-11-23	Alcohol	Right	Light ON	26	eGFP	Yoked	2	Right	24.7	4.33192	6	6	286	3.99	58	4.93103	0.0684483	0.19	162	113	100	1.37	20	5	0.0685	0.19
666	E19	1	2020-11-24	Water	Left	Light ON	27	ChR2	Paired	2	Right	25.9	30.888	6	6	185	5.8	44	4.20455	0.131818	0.7	156	126	33	0.82	6	5.5	0.136667	0.2
667	E21	3	2020-11-24	Water	Left	Light ON	27	ChR2	Yoked	2	Right	25.1	32.6693	6	6	118	4.35	46	2.56522	0.093913	0.65	350	149	22	0.79	10	2.2	0.079	0.27
668	E22	4	2020-11-24	Water	Right	Light ON	27	ChR2	Paired	2	Left	23.9	29.7071	6	6	59	2.07	17	3.47059	0.121765	0.23	352	404	5	0.21	2	2.5	0.105	0.16
669	E23	7	2020-11-24	Water	Right	Light ON	27	ChR2	Yoked	2	Left	28	34.6429	6	6	175	7.91	73	2.39726	0.104384	0.69	832	82	46	1.73	22	2.09091	0.0786364	0.27
670	E24	9	2020-11-24	Alcohol	Left	Light ON	27	eGFP	Paired	2	Left	26.1	2.60881	6	6	180	3.71	39	4.61538	0.0941026	0.58	82	174	83	1.38	17	4.88235	0.0811765	0.19
671	E25	10	2020-11-24	Alcohol	Right	Light ON	27	eGFP	Yoked	2	Right	24.7	3.67557	6	6	218	2.91	43	5.06977	0.0676744	0.18	92	130	102	1.35	20	5.1	0.0675	0.18
672	E19	1	2020-11-25	Water	Left	Light ON	28	ChR2	Paired	2	Right	26.3	26.616	6	6	184	7.11	44	4.18182	0.161591	0.86	32	150	25	1.55	6	4.16667	0.258333	0.86
673	E21	3	2020-11-25	Water	Left	Light ON	28	ChR2	Yoked	2	Right	25.2	35.7143	6	6	118	3.28	42	2.80952	0.0780952	0.65	262	167	24	1.35	10	2.4	0.135	0.65
674	E22	4	2020-11-25	Water	Right	Light ON	28	ChR2	Paired	2	Left	24.9	38.5542	6	6	171	5.39	58	2.94828	0.0927586	0.48	60	123	56	1.13	16	3.5	0.070625	0.17
675	E23	7	2020-11-25	Water	Right	Light ON	28	ChR2	Yoked	2	Left	28.6	41.958	6	6	260	14.66	108	2.40741	0.13463	0.74	284	63	80	4.73	34	2.35294	0.139118	0.74
676	E24	9	2020-11-25	Alcohol	Left	Light ON	28	eGFP	Paired	2	Left	26.5	3.05885	6	6	127	5.33	35	3.62857	0.150857	0.53	114	124	35	1.13	9	3.88889	0.125556	0.36
677	E25	10	2020-11-25	Alcohol	Right	Light ON	28	eGFP	Yoked	2	Right	24.4	3.58788	6	6	202	2.67	39	5.17949	0.0676923	0.17	80	179	38	0.4	10	3.8	0.04	0.07
678	E19	1	2020-11-26	Water	Left	Light ON	29	ChR2	Paired	2	Right	26.3	31.1787	6	6	237	8.47	52	4.55769	0.162692	1.02	117	133	87	2.67	18	4.83333	0.148333	0.74
679	E21	3	2020-11-26	Water	Left	Light ON	29	ChR2	Yoked	2	Right	25.2	32.5397	6	6	117	7.26	45	2.6	0.161333	1.54	130	149	39	2.38	12	3.25	0.198333	0.98
680	E22	4	2020-11-26	Water	Right	Light ON	29	ChR2	Paired	2	Left	24.9	26.506	6	6	114	7.32	46	2.47826	0.158913	0.57	20	142	46	4.24	20	2.3	0.212	0.57
681	E23	7	2020-11-26	Water	Right	Light ON	29	ChR2	Yoked	2	Left	28.6	28.6713	6	6	181	7.83	64	2.82812	0.122344	0.55	134	105	58	2.63	25	2.32	0.1052	0.34
682	E24	9	2020-11-26	Alcohol	Left	Light ON	29	eGFP	Paired	2	Left	26.5	2.50825	6	6	204	3.67	39	5.23077	0.0941026	0.24	356	165	22	0.5	7	3.14286	0.0714286	0.17
683	E25	10	2020-11-26	Alcohol	Right	Light ON	29	eGFP	Yoked	2	Right	24.4	3.65432	6	6	411	9.2	57	7.21053	0.160702	0.54	78	98	112	2.52	18	6.22222	0.14	0.41
684	E19	1	2020-11-27	Water	Left	Light ON	30	ChR2	Paired	4	Right	27.1	70.1107	6	6	632	12.74	159	3.97484	0.0800629	0.35	24	89	55	1.08	14	3.92857	0.0771429	0.24
685	E21	3	2020-11-27	Water	Left	Light ON	30	ChR2	Yoked	4	Right	25.7	57.9767	6	6	305	12.84	93	3.27957	0.135914	1.43	34	155	40	3.49	16	2.5	0.218125	1.43
686	E22	4	2020-11-27	Water	Right	Light ON	30	ChR2	Paired	4	Left	24.5	47.3469	6	6	16	0.86	16	1	0.053125	0.42	31	941	3	0.5	3	1	0.166667	0.42
687	E23	7	2020-11-27	Water	Right	Light ON	30	ChR2	Yoked	4	Left	28.5	59.2982	6	6	650	38.8	162	4.01235	0.239198	0.98	34	87	57	3.21	19	3	0.168947	0.48
688	E24	9	2020-11-27	Alcohol	Left	Light ON	30	eGFP	Paired	4	Left	26.3	5.23958	6	6	398	8.07	64	6.21875	0.125625	0.36	60	163	61	1.69	11	5.54545	0.153636	0.36
689	E25	10	2020-11-27	Alcohol	Right	Light ON	30	eGFP	Yoked	4	Right	24.2	6.29718	6	6	402	7.13	72	5.58333	0.0990278	1.43	108	177	62	0.74	9	6.88889	0.0822222	0.13
690	E12	5	2020-09-28	Water	Right	Light OFF	1	ChR2	Paired	2	Right	25.8	14.3411	5	1	197	15.47	56	3.51786	0.275714	2.7	594	95	60	2.93	20	3	0.1465	0.39
691	E13	14	2020-09-28	Water	Left	Light OFF	1	eGFP	Paired	2	Right	23.8	1.68067	5	1
692	E14	16	2020-09-28	Water	Right	Light OFF	1	eGFP	Paired	2	Left	25.2	4.36508	5	1	200	31.35	55	3.63636	0.552182	1.9	3414	63	0	0	0	0	0	0
693	E15	17	2020-09-28	Water	Left	Light OFF	1	eGFP	Yoked	2	Left	23	10.8696	5	1	18	3.87	12	1.5	0.319167	1.53	510	484	7	0.87	5	1.4	0.174	0.53
694	E16	18	2020-09-28	Water	Right	Light OFF	1	ChR2	Yoked	2	Left	24.3	9.87654	5	1	144	13.23	47	3.06383	0.281489	1.15	1020	113	17	2.48	5	3.4	0.496	1.02
695	E12	5	2020-09-29	Water	Right	Light OFF	2	ChR2	Paired	2	Right	25.8	17.8295	5	1	193	17.49	54	3.57407	0.317593	1.55	240	122	15	1.39	9	1.66667	0.154444	0.49
696	E13	14	2020-09-29	Water	Left	Light OFF	2	eGFP	Paired	2	Right	23.8	1.68067	5	1	96	17.97	32	3	0.56	2.49	4202	74	0	0	0	0	0	0
697	E14	16	2020-09-29	Water	Right	Light OFF	2	eGFP	Paired	2	Left	25.2	21.0317	5	1	66	32.81	30	2.2	1.01167	4.32	188	223	11	0.69	5	2.2	0.138	0.3
698	E15	17	2020-09-29	Water	Left	Light OFF	2	eGFP	Yoked	2	Left	23	17.3913	5	1	214	26.47	50	4.28	0.5294	2.74	274	136	7	0.35	2	3.5	0.175	0.19
699	E16	18	2020-09-29	Water	Right	Light OFF	2	ChR2	Yoked	2	Left	24.3	16.8724	5	1	176	25.37	56	3.14286	0.44625	3.17	104	127	17	0.83	14	1.21429	0.0592857	0.21
700	E12	5	2020-09-30	Water	Right	Light OFF	3	ChR2	Paired	2	Right	26	16.9231	5	1	9	0.93	9	1	0.103333	0.31	74	422	4	0.52	4	1	0.13	0.31
701	E13	14	2020-09-30	Water	Left	Light OFF	3	eGFP	Paired	2	Right	23.3	2.14592	5	1	78	8.5	28	2.78571	0.300357	0.75	136	239	24	2.38	8	3	0.2975	0.62
702	E14	16	2020-09-30	Water	Right	Light OFF	3	eGFP	Paired	2	Left	26.3	26.2357	5	1	140	31.97	76	1.84211	0.420395	3.15	40	93	10	1.02	4	2.5	0.255	0.39
703	E15	17	2020-09-30	Water	Left	Light OFF	3	eGFP	Yoked	2	Left	23.3	10.7296	5	1	205	17.49	48	4.27083	0.361875	1.54	94	149	9	0.62	5	1.8	0.124	0.24
704	E16	18	2020-09-30	Water	Right	Light OFF	3	ChR2	Yoked	2	Left	24.5	23.2653	5	1	198	19.35	54	3.66667	0.353519	1.73	50	126	40	3.5	13	3.07692	0.269231	0.86
705	E12	5	2020-10-01	Water	Right	Light OFF	4	ChR2	Paired	2	Right	26	31.9231	5	1	195	7.67	42	4.64286	0.182619	1.62	96	171	25	1.09	9	2.77778	0.121111	0.44
706	E13	14	2020-10-01	Water	Left	Light OFF	4	eGFP	Paired	2	Right	23.3	2.14592	5	1	124	17.93	41	3.02439	0.435366	1.49	102	105	10	0.6	2	5	0.3	0.34
707	E14	16	2020-10-01	Water	Right	Light OFF	4	eGFP	Paired	2	Left	26.3	28.8973	5	1	292	60.19	78	3.74359	0.771538	2.9	130	89	32	2.95	12	2.66667	0.245833	0.78
708	E15	17	2020-10-01	Water	Left	Light OFF	4	eGFP	Yoked	2	Left	23.3	17.5966	5	1	148	13.59	40	3.7	0.339	2.19	232	172	17	1.28	6	2.83333	0.213333	0.3
709	E16	18	2020-10-01	Water	Right	Light OFF	4	ChR2	Yoked	2	Left	24.5	19.1837	5	1	144	19.53	40	3.6	0.485	2.27	670	160	23	3.99	6	3.83333	0.665	1.57
710	E12	5	2020-10-02	Water	Right	Light OFF	5	ChR2	Paired	4	Right	26.5	56.2264	5	1	62	16.25	30	2.06667	0.537	2.26	42	461	4	0.14	3	1.33333	0.0466667	0.11
711	E13	14	2020-10-02	Water	Left	Light OFF	5	eGFP	Paired	4	Right	24.6	41.4634	5	1	729	115.55	203	3.59113	0.561527	3.19	36	63	28	3.34	6	4.66667	0.556667	1.21
712	E14	16	2020-10-02	Water	Right	Light OFF	5	eGFP	Paired	4	Left	26.5	53.9623	5	1	307	75.21	99	3.10101	0.742626	3.73	50	146	68	6.43	16	4.25	0.401875	1.34
713	E15	17	2020-10-02	Water	Left	Light OFF	5	eGFP	Yoked	4	Left	23.9	43.5146	5	1	501	57.06	101	4.9604	0.563168	2.92	352	130	17	1.72	7	2.42857	0.245714	0.53
714	E16	18	2020-10-02	Water	Right	Light OFF	5	ChR2	Yoked	4	Left	25.4	48.8189	5	1	295	46.99	92	3.20652	0.510761	2.41	92	156	22	1.55	10	2.2	0.155	0.57
715	E12	5	2020-10-05	Water	Right	Light OFF	6	ChR2	Paired	2	Right	26.5	30.9434	5	2	441	15.42	75	5.88	0.204133	1.18	66	94	29	1.58	8	3.625	0.1975	0.59
716	E13	14	2020-10-05	Water	Left	Light OFF	6	eGFP	Paired	2	Right	24.6	33.3333	5	2	610	168.73	210	2.90476	0.792905	3.58	28	34	205	38.79	64	3.20312	0.606094	2.82
717	E14	16	2020-10-05	Water	Right	Light OFF	6	eGFP	Paired	2	Left	26.1	20.3065	5	2	223	25.52	45	4.95556	0.567111	2.55	30	161	14	1.12	7	2	0.16	0.28
718	E15	17	2020-10-05	Water	Left	Light OFF	6	eGFP	Yoked	2	Left	24.8	21.371	5	2	164	11.21	44	3.72727	0.253409	1.44	234	158	37	2.31	11	3.36364	0.21	0.55
719	E16	18	2020-10-05	Water	Right	Light OFF	6	ChR2	Yoked	2	Left	25	21.2	5	2	143	10.39	56	2.55357	0.182857	0.72	120	121	24	2.53	12	2	0.210833	0.59
720	E12	5	2020-10-06	Water	Right	Light OFF	7	ChR2	Paired	2	Right	26.5	32.0755	5	2	434	14.63	71	6.11268	0.206056	1.07	64	96	67	2.66	13	5.15385	0.204615	0.54
721	E13	14	2020-10-06	Water	Left	Light OFF	7	eGFP	Paired	2	Right	24.6	15.0407	5	2	166	26.2	40	4.15	0.655	3.07	60	179	59	6.47	13	4.53846	0.497692	1.54
722	E14	16	2020-10-06	Water	Right	Light OFF	7	eGFP	Paired	2	Left	26.1	28.3525	5	2	198	13.6	44	4.5	0.305227	1.82	952	119	31	0.56	7	4.42857	0.08	0.24
723	E15	17	2020-10-06	Water	Left	Light OFF	7	eGFP	Yoked	2	Left	24.8	17.7419	5	2	167	16.27	44	3.79545	0.369545	1.18	110	138	38	3.48	9	4.22222	0.386667	0.97
724	E16	18	2020-10-06	Water	Right	Light OFF	7	ChR2	Yoked	2	Left	25	21.6	5	2	135	12.44	37	3.64865	0.336216	1.11	82	154	29	2.23	11	2.63636	0.202727	1.01
725	E12	5	2020-10-07	Water	Right	Light OFF	8	ChR2	Paired	2	Right	26.7	38.2022	5	2
726	E13	14	2020-10-07	Water	Left	Light OFF	8	eGFP	Paired	2	Right	24.4	29.0984	5	2	124	17.93	41	3.02439	0.435366	1.49	102	105	10	0.6	2	5	0.3	0.34
727	E14	16	2020-10-07	Water	Right	Light OFF	8	eGFP	Paired	2	Left	26.4	36.3636	5	2
728	E15	17	2020-10-07	Water	Left	Light OFF	8	eGFP	Yoked	2	Left	25.1	11.5538	5	2	368	19.09	73	5.0411	0.261507	1.39	26	98	62	6.07	20	3.1	0.3035	1.39
729	E16	18	2020-10-07	Water	Right	Light OFF	8	ChR2	Yoked	2	Left	25.4	28.7402	5	2	143	10	56	2.55357	0.178393	1.23	112	127	27	2.51	12	2.25	0.209167	0.95
730	E12	5	2020-10-08	Water	Right	Light OFF	9	ChR2	Paired	2	Right	26.7	23.5955	5	2	296	12.74	63	4.69841	0.202222	0.99	724	100	1	0.03	1	1	0.03	0.03
731	E13	14	2020-10-08	Water	Left	Light OFF	9	eGFP	Paired	2	Right	24.4	21.3115	5	2
732	E14	16	2020-10-08	Water	Right	Light OFF	9	eGFP	Paired	2	Left	26.4	26.5152	5	2	333	48.84	62	5.37097	0.787419	3.15	788	103	13	1.11	5	2.6	0.222	0.6
733	E15	17	2020-10-08	Water	Left	Light OFF	9	eGFP	Yoked	2	Left	25.1	7.17131	5	2	108	4.81	22	4.90909	0.218636	0.85	1842	189	0	0	0	0	0	0
734	E16	18	2020-10-08	Water	Right	Light OFF	9	ChR2	Yoked	2	Left	25.4	22.4409	5	2	139	9.95	40	3.475	0.24875	1.23	114	175	20	1.11	10	2	0.111	0.37
735	E12	5	2020-10-09	Water	Right	Light OFF	10	ChR2	Paired	4	Right	26.7	66.2921	5	2	884	27.95	160	5.525	0.174563	2.06	50	86	38	1.21	9	4.22222	0.134444	0.66
736	E13	14	2020-10-09	Water	Left	Light OFF	10	eGFP	Paired	4	Right	24.4	45.9016	5	2
737	E14	16	2020-10-09	Water	Right	Light OFF	10	eGFP	Paired	4	Left	26.4	55.303	5	2	660	36.22	105	6.28571	0.342	1.49	330	114	10	0.68	4	2.5	0.17	0.39
738	E15	17	2020-10-09	Water	Left	Light OFF	10	eGFP	Yoked	4	Left	25.1	60.1594	5	2	520	85.84	107	4.85981	0.784393	3.39	60	130	20	3.15	8	2.5	0.39375	1.14
739	E16	18	2020-10-09	Water	Right	Light OFF	10	ChR2	Yoked	4	Left	25.4	65.748	5	2	285	12.8	100	2.85	0.1274	1.71	56	141	9	0.37	5	1.8	0.074	0.21
740	E12	5	2020-10-12	Water	Right	Light OFF	11	ChR2	Paired	2	Right	27.1	28.7823	5	3
741	E13	14	2020-10-12	Water	Left	Light OFF	11	eGFP	Paired	2	Right	25.1	13.9442	5	3
742	E14	16	2020-10-12	Water	Right	Light OFF	11	eGFP	Paired	2	Left	27.5	34.5455	5	3	256	46.23	51	5.01961	0.849412	3.26	48	139	70	13.27	14	5	0.947857	3.26
743	E15	17	2020-10-12	Water	Left	Light OFF	11	eGFP	Yoked	2	Left	26.7	18.7266	5	3	153	26.26	34	4.5	0.772353	3.5	530	174	7	2.24	6	1.16667	0.373333	0.77
744	E16	18	2020-10-12	Water	Right	Light OFF	11	ChR2	Yoked	2	Left	26.4	33.7121	5	3	202	4.19	51	3.96078	0.0805882	0.44	86	137	56	1.04	13	4.30769	0.08	0.16
745	E12	5	2020-10-13	Water	Right	Light OFF	12	ChR2	Paired	2	Right	27.1	27.6753	5	3	292	10.71	67	4.35821	0.159701	0.73	68	105	21	1.09	7	3	0.155714	0.65
746	E13	14	2020-10-13	Water	Left	Light OFF	12	eGFP	Paired	2	Right	25.1	17.9283	5	3
747	E14	16	2020-10-13	Water	Right	Light OFF	12	eGFP	Paired	2	Left	27.5	38.1818	5	3	392	21.2	73	5.36986	0.290411	2.26	70	95	35	1.99	11	3.18182	0.180909	0.72
748	E15	17	2020-10-13	Water	Left	Light OFF	12	eGFP	Yoked	2	Left	26.7	22.4719	5	3	185	25.66	42	4.40476	0.609048	2.62	110	170	24	6.19	8	3	0.77375	1.5
749	E16	18	2020-10-13	Water	Right	Light OFF	12	ChR2	Yoked	2	Left	26.4	32.197	5	3	109	3.13	41	2.65854	0.0714634	0.45	172	163	20	0.41	8	2.5	0.05125	0.16
750	E12	5	2020-10-14	Water	Right	Light OFF	13	ChR2	Paired	2	Right	27.1	34.3173	5	3	186	31.71	50	3.72	0.6342	2.81	106	127	24	2.77	7	3.42857	0.395714	0.85
751	E13	14	2020-10-14	Water	Left	Light OFF	13	eGFP	Paired	2	Right	25.6	20.7031	5	3	160	44.12	71	2.25352	0.61662	3.24	128	91	62	21.8	32	1.9375	0.68125	3.01
752	E14	16	2020-10-14	Water	Right	Light OFF	13	eGFP	Paired	2	Left	28.3	31.8021	5	3	232	8.82	54	4.2963	0.163333	0.55	434	126	46	1.87	12	3.83333	0.155833	0.55
753	E15	17	2020-10-14	Water	Left	Light OFF	13	eGFP	Yoked	2	Left	26.8	21.2687	5	3	322	40.7	65	4.95385	0.616308	3.08	466	104	21	4.09	14	1.5	0.292143	1.1
754	E16	18	2020-10-14	Water	Right	Light OFF	13	ChR2	Yoked	2	Left	26.7	27.7154	5	3	116	2.23	41	2.82927	0.0541463	0.25	120	171	14	0.39	4	3.5	0.0975	0.21
755	E12	5	2020-10-15	Water	Right	Light OFF	14	ChR2	Paired	2	Right	27.1	30.9963	5	3	312	11.88	63	4.95238	0.188254	0.65	115	114	15	0.78	6	2.5	0.13	0.45
756	E13	14	2020-10-15	Water	Left	Light OFF	14	eGFP	Paired	2	Right	25.6	23.0469	5	3	79	33.59	35	2.25714	0.959143	3.31	294	195	15	2.36	5	3	0.472	0.99
757	E14	16	2020-10-15	Water	Right	Light OFF	14	eGFP	Paired	2	Left	28.3	29.682	5	3	221	9.5	56	3.94643	0.166786	0.66	340	121	34	2.27	13	2.61538	0.174615	0.58
758	E15	17	2020-10-15	Water	Left	Light OFF	14	eGFP	Yoked	2	Left	26.8	26.1194	5	3	450	36.23	63	7.14286	0.574762	1.63	1384	93	20	0.69	3	6.66667	0.23	0.36
759	E16	18	2020-10-15	Water	Right	Light OFF	14	ChR2	Yoked	2	Left	26.7	31.8352	5	3	129	2.05	46	2.80435	0.0441304	0.16	82	157	9	0.15	6	1.5	0.025	0.07
760	E12	5	2020-10-16	Water	Right	Light OFF	15	ChR2	Paired	4	Right	27.4	61.6788	5	3	791	26.7	145	5.45517	0.183517	0.98	232	79	80	3.34	15	5.33333	0.222667	0.71
761	E13	14	2020-10-16	Water	Left	Light OFF	15	eGFP	Paired	4	Right	26	62.6923	5	3	164	114	101	1.62376	1.11178	4.01	96	142	15	5.73	8	1.875	0.71625	2.84
762	E14	16	2020-10-16	Water	Right	Light OFF	15	eGFP	Paired	4	Left	28.1	55.516	5	3	588	57.01	107	5.49533	0.523178	2.77	666	109	56	4.13	11	5.09091	0.375455	1.07
763	E15	17	2020-10-16	Water	Left	Light OFF	15	eGFP	Yoked	4	Left	27.4	50.7299	5	3	974	100.18	172	5.66279	0.58064	2.64	160	82	21	1.56	5	4.2	0.312	0.68
764	E16	18	2020-10-16	Water	Right	Light OFF	15	ChR2	Yoked	4	Left	27.3	54.5788	5	3	271	6.33	90	3.01111	0.0701111	0.41	88	149	26	0.6	11	2.36364	0.0545455	0.26
765	E12	5	2020-10-19	Water	Right	Light ON	16	ChR2	Paired	2	Right	27.6	40.2174	5	4	384	13.05	67	5.73134	0.194179	0.79	1336	87	74	1.82	11	6.72727	0.165455	0.79
766	E13	14	2020-10-19	Water	Left	Light ON	16	eGFP	Paired	2	Right	25.9	15.0579	5	4	32	14.72	26	1.23077	0.55	2.64	344	242	12	2.02	11	1.09091	0.183636	0.89
767	E14	16	2020-10-19	Water	Right	Light ON	16	eGFP	Paired	2	Left	28.3	31.4488	5	4	140	7.71	39	3.58974	0.197692	0.7	450	175	26	1.72	6	4.33333	0.286667	0.7
768	E15	17	2020-10-19	Water	Left	Light ON	16	eGFP	Yoked	2	Left	27.4	25.1825	5	4	287	39.13	65	4.41538	0.597692	3.2	186	103	13	1.04	7	1.85714	0.148571	0.43
769	E16	18	2020-10-19	Water	Right	Light ON	16	ChR2	Yoked	2	Left	27.6	33.3333	5	4	86	2.71	34	2.52941	0.0797059	0.37	108	205	6	0.09	4	1.5	0.0225	0.04
770	E12	5	2020-10-20	Water	Right	Light ON	17	ChR2	Paired	2	Right	27.6	44.5652	5	4	374	12.33	74	5.05405	0.166486	0.77	1820	72	0	0	0	0	0	0
771	E13	14	2020-10-20	Water	Left	Light ON	17	eGFP	Paired	2	Right	25.9	17.7606	5	4	79	13.49	29	2.72414	0.45931	1.84	88	252	30	1.64	14	2.14286	0.117143	0.63
772	E14	16	2020-10-20	Water	Right	Light ON	17	eGFP	Paired	2	Left	28.3	38.5159	5	4	326	27.66	61	5.34426	0.453443	2.7	162	110	71	6.35	16	4.4375	0.396875	1.78
773	E15	17	2020-10-20	Water	Left	Light ON	17	eGFP	Yoked	2	Left	27.4	25.1825	5	4	384	32.28	69	5.56522	0.467826	2.03	28	99	44	3.91	16	2.75	0.244375	0.88
774	E16	18	2020-10-20	Water	Right	Light ON	17	ChR2	Yoked	2	Left	27.6	32.2464	5	4	223	5.81	57	3.91228	0.101754	0.44	314	114	41	2.05	11	3.72727	0.186364	0.44
775	E12	5	2020-10-21	Water	Right	Light ON	18	ChR2	Paired	2	Right	27.7	29.6029	5	4	354	10.52	64	5.53125	0.16375	0.71	92	112	20	1.12	7	2.85714	0.16	0.71
776	E13	14	2020-10-21	Water	Left	Light ON	18	eGFP	Paired	2	Right	26.5	23.3962	5	4	202	36.4	54	3.74074	0.669444	2.38	74	133	29	3.08	7	4.14286	0.44	1.53
777	E14	16	2020-10-21	Water	Right	Light ON	18	eGFP	Paired	2	Left	28.9	33.218	5	4	286	15.09	51	5.60784	0.295098	2.41	703	112	18	0.55	4	4.5	0.1375	0.29
778	E15	17	2020-10-21	Water	Left	Light ON	18	eGFP	Yoked	2	Left	27.9	17.9211	5	4	189	22.32	43	4.39535	0.505814	2.99	50	164	21	2	9	2.33333	0.222222	0.88
779	E16	18	2020-10-21	Water	Right	Light ON	18	ChR2	Yoked	2	Left	28.2	30.8511	5	4	205	9.67	52	3.94231	0.185577	1.73	166	118	67	6.15	14	4.78571	0.439286	1.73
780	E12	5	2020-10-22	Water	Right	Light ON	19	ChR2	Paired	2	Right	27.7	33.935	5	4	402	14.48	72	5.58333	0.200972	0.78	98	96	33	1.17	10	3.3	0.117	0.78
781	E13	14	2020-10-22	Water	Left	Light ON	19	eGFP	Paired	2	Right	26.5	20.7547	5	4	98	31.48	53	1.84906	0.574906	3.33	46	133	38	9.76	17	2.23529	0.574118	2.44
782	E14	16	2020-10-22	Water	Right	Light ON	19	eGFP	Paired	2	Left	28.9	28.0277	5	4	213	9.63	45	4.73333	0.202222	1.27	662	145	2	0.02	1	2	0.02	0.02
783	E15	17	2020-10-22	Water	Left	Light ON	19	eGFP	Yoked	2	Left	27.9	24.3728	5	4	240	16	47	5.10638	0.340213	1.5	320	139	5	0.22	4	1.25	0.055	0.1
784	E16	18	2020-10-22	Water	Right	Light ON	19	ChR2	Yoked	2	Left	28.2	25.1773	5	4	127	4.42	42	3.02381	0.104048	0.75	654	152	23	1.42	9	2.55556	0.157778	0.75
785	E12	5	2020-10-23	Water	Right	Light ON	20	ChR2	Paired	4	Right	28.2	47.8723	5	4	617	43.48	124	4.97581	0.350484	3.22	2111	83	0	0	0	0	0	0
786	E13	14	2020-10-23	Water	Left	Light ON	20	eGFP	Paired	4	Right	27.1	41.6974	5	4	144	82.59	65	2.21538	1.19123	3.96	24	223	26	3.31	11	2.36364	0.300909	1.01
787	E14	16	2020-10-23	Water	Right	Light ON	20	eGFP	Paired	4	Left	29.2	51.7123	5	4	192	14.97	63	3.04762	0.219206	1.13	143	215	12	1.26	8	1.5	0.1575	0.42
788	E15	17	2020-10-23	Water	Left	Light ON	20	eGFP	Yoked	4	Left	27.8	48.9209	5	4	456	63.91	89	5.1236	0.71809	2.84	1240	149	11	1.06	3	3.66667	0.353333	1.04
789	E16	18	2020-10-23	Water	Right	Light ON	20	ChR2	Yoked	4	Left	28.3	54.7703	5	4	243	5.06	79	3.07595	0.0635443	0.37	1096	157	31	0.5	8	3.875	0.0625	0.28
790	E12	5	2020-10-26	Water	Right	Light ON	21	ChR2	Paired	2	Right	27.8	28.4173	5	5	269	15.39	58	4.63793	0.264655	1.77	184	122	6	0.12	2	3	0.06	0.12
791	E13	14	2020-10-26	Water	Left	Light ON	21	eGFP	Paired	2	Right	26.9	9.66543	5	5	46	9.77	23	2	0.416087	2.4	270	302	7	1.63	4	1.75	0.4075	0.63
792	E14	16	2020-10-26	Water	Right	Light ON	21	eGFP	Paired	2	Left	29.1	28.866	5	5	285	12.02	54	5.27778	0.221481	0.68	242	115	31	1.71	6	5.16667	0.285	0.51
793	E15	17	2020-10-26	Water	Left	Light ON	21	eGFP	Yoked	2	Left	28	16.0714	5	5	193	20.14	40	4.825	0.5035	2.83	52	174	14	0.82	9	1.55556	0.0911111	0.3
794	E16	18	2020-10-26	Water	Right	Light ON	21	ChR2	Yoked	2	Left	28.2	21.2766	5	5	120	5.26	40	3	0.1315	0.85	208	164	38	1.57	15	2.53333	0.104667	0.5
795	E12	5	2020-10-27	Water	Right	Light ON	22	ChR2	Paired	2	Right	27.8	33.4532	5	5	261	13.51	62	4.20968	0.217903	1.83	64	113	32	2.5	7	4.57143	0.357143	1.79
796	E13	14	2020-10-27	Water	Left	Light ON	22	eGFP	Paired	2	Right	26.9	17.1004	5	5	83	22.66	36	2.30556	0.572778	3.01	46	202	38	6.32	15	2.53333	0.421333	1.39
797	E14	16	2020-10-27	Water	Right	Light ON	22	eGFP	Paired	2	Left	29.1	31.9588	5	5	267	12.43	53	5.03774	0.23434	1.09	1353	99	31	1.55	8	3.875	0.19375	0.46
798	E15	17	2020-10-27	Water	Left	Light ON	22	eGFP	Yoked	2	Left	28	21.4286	5	5	236	30.66	47	5.02128	0.65234	2.53	142	152	14	0.51	5	2.8	0.102	0.2
799	E16	18	2020-10-27	Water	Right	Light ON	22	ChR2	Yoked	2	Left	28.2	29.4326	5	5	184	8	55	3.34545	0.131636	0.63	318	118	33	1.47	11	3	0.133636	0.32
800	E12	5	2020-10-28	Water	Right	Light ON	23	ChR2	Paired	2	Right	28.2	26.9504	5	5
801	E13	14	2020-10-28	Water	Left	Light ON	23	eGFP	Paired	2	Right	27.1	18.0812	5	5	56	32.27	35	1.6	0.920857	3.36	168	203	8	1.93	5	1.6	0.386	1.4
802	E14	16	2020-10-28	Water	Right	Light ON	23	eGFP	Paired	2	Left	29.3	33.7884	5	5	350	28.28	63	5.55556	0.422857	2.24	360	107	55	5.43	13	4.23077	0.417692	1.25
803	E15	17	2020-10-28	Water	Left	Light ON	23	eGFP	Yoked	2	Left	28.4	22.1831	5	5	334	25.14	60	5.56667	0.418167	1.47	321	114	13	0.72	4	3.25	0.18	0.51
804	E16	18	2020-10-28	Water	Right	Light ON	23	ChR2	Yoked	2	Left	28.6	31.4685	5	5	239	7.54	66	3.62121	0.114242	0.87	174	97	76	2.16	23	3.30435	0.093913	0.37
805	E12	5	2020-10-29	Water	Right	Light ON	24	ChR2	Paired	2	Right	28.2	28.7234	5	5	325	12.15	67	4.85075	0.181343	1.47	74	99	22	0.53	5	4.4	0.106	0.24
806	E13	14	2020-10-29	Water	Left	Light ON	24	eGFP	Paired	2	Right	27.1	88.9299	5	5	541	84.75	121	4.47107	0.675124	3.31	6	59	404	45.78	74	5.45946	0.618649	3.31
807	E14	16	2020-10-29	Water	Right	Light ON	24	eGFP	Paired	2	Left	29.3	30.7167	5	5	239	7.95	50	4.78	0.1582	0.77	264	124	32	1.46	8	4	0.1825	0.37
808	E15	17	2020-10-29	Water	Left	Light ON	24	eGFP	Yoked	2	Left	28.4	21.4789	5	5	394	32.01	70	5.62857	0.457286	1.49	38	97	33	1.48	10	3.3	0.148	0.4
809	E16	18	2020-10-29	Water	Right	Light ON	24	ChR2	Yoked	2	Left	28.6	29.021	5	5	186	11.8	69	2.69565	0.16942	1.42	20	102	21	1.31	10	2.1	0.131	0.37
810	E12	5	2020-10-30	Water	Right	Light ON	25	ChR2	Paired	4	Right	28.6	65.7343	5	5	77	15.96	50	1.54	0.3192	1.33	150	287	12	2.32	5	2.4	0.464	1.29
811	E13	14	2020-10-30	Water	Left	Light ON	25	eGFP	Paired	4	Right	28.1	57.2954	5	5	229	62.4	111	2.06306	0.549459	4.15	22	129	43	3.76	17	2.52941	0.221176	0.91
812	E14	16	2020-10-30	Water	Right	Light ON	25	eGFP	Paired	4	Left	30.1	56.8106	5	5	551	76.18	116	4.75	0.651379	3.15	108	122	35	4.41	9	3.88889	0.49	1.35
813	E15	17	2020-10-30	Water	Left	Light ON	25	eGFP	Yoked	4	Left	28.5	43.8596	5	5	555	81.41	115	4.82609	0.707826	3.94	118	122	51	4.42	12	4.25	0.368333	1.17
814	E16	18	2020-10-30	Water	Right	Light ON	25	ChR2	Yoked	4	Left	29.1	53.2646	5	5	448	35.44	149	3.00671	0.224832	2.02	68	96	85	9.16	34	2.5	0.269412	1.83
815	E12	5	2020-11-02	Water	Right	Light ON	26	ChR2	Paired	2	Right	28	28.5714	5	6	239	16.48	53	4.50943	0.310755	2.05	2345	86	0	0	0	0	0	0
816	E13	14	2020-11-02	Water	Left	Light ON	26	eGFP	Paired	2	Right	27.4	20.073	5	6	39	18.64	29	1.34483	0.627241	3.37	114	249	9	3.13	6	1.5	0.521667	1.47
817	E14	16	2020-11-02	Water	Right	Light ON	26	eGFP	Paired	2	Left	30	29.3333	5	6	92	9.76	40	2.3	0.22425	1.29	1098	154	22	2.77	8	2.75	0.34625	1.29
818	E15	17	2020-11-02	Water	Left	Light ON	26	eGFP	Yoked	2	Left	28.3	9.18728	5	6	53	14.81	17	3.11765	0.871176	3.17	304	406	12	1.51	3	4	0.503333	0.74
819	E16	18	2020-11-02	Water	Right	Light ON	26	ChR2	Yoked	2	Left	28.6	25.1748	5	6	104	8.01	44	2.36364	0.181591	2.22	499	147	9	0.33	5	1.8	0.066	0.2
820	E12	5	2020-11-03	Water	Right	Light ON	27	ChR2	Paired	2	Right	28	36.0714	5	6
821	E13	14	2020-11-03	Water	Left	Light ON	27	eGFP	Paired	2	Right	27.4	25.1825	5	6	107	42.66	55	1.94545	0.745818	3.84	38	130	51	21.72	27	1.88889	0.804444	3.84
822	E14	16	2020-11-03	Water	Right	Light ON	27	eGFP	Paired	2	Left	30	37	5	6	312	13.78	64	4.875	0.215312	1.65	166	108	40	1.81	11	3.63636	0.164545	0.39
823	E15	17	2020-11-03	Water	Left	Light ON	27	eGFP	Yoked	2	Left	28.3	22.9682	5	6	174	33.74	42	4.14286	0.800714	4.08	224	168	38	6.19	11	3.45455	0.562727	2.12
824	E16	18	2020-11-03	Water	Right	Light ON	27	ChR2	Yoked	2	Left	28.6	36.3636	5	6	160	5.64	60	2.66667	0.0933333	0.65	84	116	37	1.05	14	2.64286	0.075	0.23
825	E12	5	2020-11-04	Water	Right	Light ON	28	ChR2	Paired	2	Right	28.6	29.3706	5	6	266	28.6	89	2.98876	0.318764	2.32	10	76	68	9.92	29	2.34483	0.342069	2.32
826	E13	14	2020-11-04	Water	Left	Light ON	28	eGFP	Paired	2	Right	27.6	25.3623	5	6	90	20.78	44	2.04545	0.459773	2.41	34	158	32	7.62	20	1.6	0.381	1.98
827	E14	16	2020-11-04	Water	Right	Light ON	28	eGFP	Paired	2	Left	30.6	31.3725	5	6	149	10.72	46	3.23913	0.231522	0.57	120	142	51	3.91	13	3.92308	0.300769	0.54
828	E15	17	2020-11-04	Water	Left	Light ON	28	eGFP	Yoked	2	Left	28.7	17.4216	5	6	392	61.62	103	3.80583	0.592913	3.07	40	66	19	0.64	8	2.375	0.08	0.22
829	E16	18	2020-11-04	Water	Right	Light ON	28	ChR2	Yoked	2	Left	29	25.8621	5	6	182	4.18	47	3.87234	0.0882979	0.65	202	149	67	1.91	18	3.72222	0.106111	0.65
830	E12	5	2020-11-05	Water	Right	Light ON	29	ChR2	Paired	2	Right	28.6	30.7692	5	6
831	E13	14	2020-11-05	Water	Left	Light ON	29	eGFP	Paired	2	Right	27.6	21.0145	5	6	78	36.4	35	2.22857	0.896857	3.3	20	210	24	7.35	11	2.18182	0.668182	2.04
832	E14	16	2020-11-05	Water	Right	Light ON	29	eGFP	Paired	2	Left	30.6	27.451	5	6	259	10.13	50	5.18	0.2026	0.97	86	130	57	1.92	15	3.8	0.128	0.41
833	E15	17	2020-11-05	Water	Left	Light ON	29	eGFP	Yoked	2	Left	28.7	14.6341	5	6	80	28.78	40	2	0.7195	1.88	74	179	24	8.52	14	1.71429	0.608571	1.45
834	E16	18	2020-11-05	Water	Right	Light ON	29	ChR2	Yoked	2	Left	29	27.2414	5	6	118	3.88	49	2.40816	0.0791837	0.71	52	142	26	1.55	9	2.88889	0.172222	0.71
835	E12	5	2020-11-06	Water	Right	Light ON	30	ChR2	Paired	4	Right	29.3	64.5051	5	6	161	30	93	1.73118	0.313656	2.61	24	154	35	4.82	19	1.84211	0.253684	0.68
836	E13	14	2020-11-06	Water	Left	Light ON	30	eGFP	Paired	4	Right	27.7	45.4874	5	6	206	69.63	93	2.21505	0.745484	3.23	66	154	45	7.2	23	1.95652	0.313043	0.98
837	E14	16	2020-11-06	Water	Right	Light ON	30	eGFP	Paired	4	Left	30.08	56.8484	5	6	485	14.29	95	5.10526	0.150211	0.46	199	133	54	2.31	14	3.85714	0.165	0.39
838	E15	17	2020-11-06	Water	Left	Light ON	30	eGFP	Yoked	4	Left	28.4	48.5915	5	6	349	71.94	99	3.52525	0.725556	4.14	26	136	37	5.98	13	2.84615	0.46	1.94
839	E16	18	2020-11-06	Water	Right	Light ON	30	ChR2	Yoked	4	Left	29	60.3448	5	6	333	23.53	100	3.33	0.2285	1.33	68	143	44	2.22	14	3.14286	0.158571	0.49
992	F9	5	2021-01-25	Water	Right	Light OFF	1	ChR2	Yoked	2	Left	22.5	3.11111	8	1	13	0.94	7	1.85714	0.134286	0.23	3778	459	0	0	0	0	0	0
993	F13	7	2021-01-25	Water	Right	Light OFF	1	ChR2	Paired	2	Right	21.7	1.84332	8	1	28	2.15	19	1.47368	0.11	0.46	924	332	4	0.42	3	1.33333	0.14	0.41
994	F15	16	2021-01-25	Water	Right	Light OFF	1	eGFP	Yoked	2	Left	20.6	3.39806	8	1	54	9.65	32	1.6875	0.301563	1.55	978	167	18	6.03	10	1.8	0.603	1.55
995	F16	17	2021-01-25	Water	Left	Light OFF	1	eGFP	Paired	2	Right	20.3	2.46305	8	1	47	4.28	21	2.2381	0.200952	0.72	4615	129	0	0	0	0	0	0
998	F9	5	2021-01-26	Water	Right	Light OFF	2	ChR2	Yoked	2	Left	22.5	1.77778	8	1	6	0.61	6	1	0.1	0.46	1592	1019	1	0	1	1	0	0
999	F13	7	2021-01-26	Water	Right	Light OFF	2	ChR2	Paired	2	Right	21.7	1.38249	8	1	76	20	38	2	0.526316	3.99	298	178	11	1.31	6	1.83333	0.218333	0.5
1000	F15	16	2021-01-26	Water	Right	Light OFF	2	eGFP	Yoked	2	Left	20.6	49.5146	8	1	20	2.56	13	1.53846	0.195385	0.57	858	395	1	0.13	1	1	0.13	0.13
1001	F16	17	2021-01-26	Water	Left	Light OFF	2	eGFP	Paired	2	Right	20.3	17.2414	8	1	236	14.42	71	3.32394	0.200563	1.41	464	92	8	0.31	5	1.6	0.062	0.16
1004	F9	5	2021-01-27	Water	Right	Light OFF	3	ChR2	Yoked	2	Left	22.9	1.31004	8	1	18	1.41	10	1.8	0.136	0.62	416	636	4	0.24	3	1.33333	0.08	0.13
1005	F13	7	2021-01-27	Water	Right	Light OFF	3	ChR2	Paired	2	Right	21.9	3.65297	8	1	48	5.2	30	1.6	0.121	0.72	160	235	1	0.04	1	1	0.04	0.04
1006	F15	16	2021-01-27	Water	Right	Light OFF	3	eGFP	Yoked	2	Left	20.9	2.39234	8	1	3	0.12	3	1	0.04	0.07	3433	1637	0	0	0	0	0	0
1007	F16	17	2021-01-27	Water	Left	Light OFF	3	eGFP	Paired	2	Right	20.8	13.4615	8	1	165	9.61	52	3.17308	0.183269	1.11	150	134	18	1.23	11	1.63636	0.111818	0.46
1010	F9	5	2021-01-28	Water	Right	Light OFF	4	ChR2	Yoked	2	Left	22.9	60.6987	8	1	867	46.23	217	3.99539	0.211613	1.2	224	28	475	24.1	127	3.74016	0.189764	0.81
1011	F13	7	2021-01-28	Water	Right	Light OFF	4	ChR2	Paired	2	Right	21.9	71.2329	8	1	595	38.47	163	3.65031	0.23454	2.1	101	43	329	18.49	92	3.57609	0.200978	1.21
1012	F15	16	2021-01-28	Water	Right	Light OFF	4	eGFP	Yoked	2	Left	20.9	53.11	8	1	445	72.71	116	3.83621	0.605776	3.29	288	52	138	13.69	40	3.45	0.34225	1
1013	F16	17	2021-01-28	Water	Left	Light OFF	4	eGFP	Paired	2	Right	20.8	61.0577	8	1	687	33.61	174	3.94828	0.192816	1.37	72	39	364	17.72	91	4	0.194725	1.36
1016	F9	5	2021-01-29	Water	Right	Light OFF	5	ChR2	Yoked	4	Left	24.6	58.5366	8	1	418	42.26	140	2.98571	0.300643	2.01	286	101	17	1.64	8	2.125	0.205	0.61
1017	F13	7	2021-01-29	Water	Right	Light OFF	5	ChR2	Paired	4	Right	23.4	57.265	8	1	826	47.96	166	4.9759	0.28253	2.1	148	86	13	3.15	10	1.3	0.315	1.36
1018	F15	16	2021-01-29	Water	Right	Light OFF	5	eGFP	Yoked	4	Left	21.9	43.8356	8	1	367	26.22	90	4.07778	0.289778	1.64	70	121	5	0.11	2	2.5	0.055	0.06
1019	F16	17	2021-01-29	Water	Left	Light OFF	5	eGFP	Paired	4	Right	21.6	48.1481	8	1	900	46.89	192	4.6875	0.243333	1.23	252	74	72	5	21	3.42857	0.238095	0.97
1022	F9	5	2021-02-01	Water	Right	Light OFF	6	ChR2	Yoked	2	Left	24.7	40.8907	8	2	51	18.19	43	1.18605	0.409535	5.99	100	150	15	2.94	13	1.15385	0.226154	1.26
1023	F13	7	2021-02-01	Water	Right	Light OFF	6	ChR2	Paired	2	Right	23.6	30.9322	8	2	307	18.51	79	3.88608	0.233671	2.36	104	90	53	1.27	13	4.07692	0.0976923	0.23
1024	F15	16	2021-02-01	Water	Right	Light OFF	6	eGFP	Yoked	2	Left	22.3	28.6996	8	2	150	25.59	37	4.05405	0.684324	3.07	62	177	5	0.89	3	1.66667	0.296667	0.61
1025	F16	17	2021-02-01	Water	Left	Light OFF	6	eGFP	Paired	2	Right	21.6	20.8333	8	2	238	8.84	63	3.77778	0.140317	0.59	1202	86	5	0.46	3	1.66667	0.153333	0.35
1028	F9	5	2021-02-02	Water	Right	Light OFF	7	ChR2	Yoked	2	Left	24.7	84.6154	8	2	709	32.28	144	4.92361	0.223958	1.51	94	47	328	12.74	62	5.29032	0.205484	1.17
1029	F13	7	2021-02-02	Water	Right	Light OFF	7	ChR2	Paired	2	Right	23.6	87.7119	8	2	682	27.66	138	4.94203	0.200362	2.86	43	51	323	11.11	62	5.20968	0.179194	0.75
1030	F15	16	2021-02-02	Water	Right	Light OFF	7	eGFP	Yoked	2	Left	22.3	56.0538	8	2	320	54.36	69	4.63768	0.787826	3.16	28	80	154	27.87	37	4.16216	0.753243	2.15
1031	F16	17	2021-02-02	Water	Left	Light OFF	7	eGFP	Paired	2	Right	21.6	71.2963	8	2	555	23.56	163	3.40491	0.141472	1.34	40	42	237	11.02	70	3.38571	0.157429	1.34
1034	F9	5	2021-02-03	Water	Right	Light OFF	8	ChR2	Yoked	2	Left	25.9	44.7876	8	2	173	17.8	62	2.79032	0.284516	2.05	64	108	51	3.58	20	2.55	0.179	0.84
1035	F13	7	2021-02-03	Water	Right	Light OFF	8	ChR2	Paired	2	Right	24	30	8	2	203	9.49	52	3.90385	0.1825	1.84	725	122	27	1.13	10	2.7	0.113	0.49
1036	F15	16	2021-02-03	Water	Right	Light OFF	8	eGFP	Yoked	2	Left	22.9	31.441	8	2	220	16.96	42	5.2381	0.40381	1.9	1967	110	0	0	0	0	0	0
1037	F16	17	2021-02-03	Water	Left	Light OFF	8	eGFP	Paired	2	Right	22.4	32.1429	8	2	241	9.13	77	3.12987	0.112208	0.59	350	85	9	0.27	6	1.5	0.045	0.13
1040	F9	5	2021-02-04	Water	Right	Light OFF	9	ChR2	Yoked	2	Left	25.9	37.0656	8	2	147	6.62	35	4.2	0.187429	0.61	145	166	18	1.08	10	1.8	0.108	0.31
1041	F13	7	2021-02-04	Water	Right	Light OFF	9	ChR2	Paired	2	Right	24	37.0833	8	2	281	5.52	61	4.60656	0.0904918	0.5	48	112	46	1.46	16	2.875	0.09125	0.5
1042	F15	16	2021-02-04	Water	Right	Light OFF	9	eGFP	Yoked	2	Left	22.9	35.8079	8	2	319	28.59	61	5.22951	0.451311	3.55	472	102	68	6.26	18	3.77778	0.347778	1.31
1043	F16	17	2021-02-04	Water	Left	Light OFF	9	eGFP	Paired	2	Right	22.4	28.125	8	2	137	10.43	51	2.68627	0.202941	1.35	66	132	13	0.76	5	2.6	0.152	0.41
1046	F9	5	2021-02-05	Water	Right	Light OFF	10	ChR2	Yoked	4	Left	26.3	64.6388	8	2	458	29.47	122	3.7541	0.240574	1.19	96	114	35	2.82	14	2.5	0.201429	0.57
1047	F13	7	2021-02-05	Water	Right	Light OFF	10	ChR2	Paired	4	Right	24.2	64.876	8	2	274	12.63	92	2.97826	0.13663	4.72	136	143	30	1.26	11	2.72727	0.114545	0.63
1048	F15	16	2021-02-05	Water	Right	Light OFF	10	eGFP	Yoked	4	Left	23.5	68.9362	8	2	608	77.82	123	4.94309	0.611138	3.31	1183	106	46	3.74	13	3.53846	0.287692	1.01
1049	F16	17	2021-02-05	Water	Left	Light OFF	10	eGFP	Paired	4	Right	22.8	62.7193	8	2	498	27.57	150	3.32	0.182667	1.93	104	93	28	1.72	12	2.33333	0.143333	0.79
1052	F9	5	2021-02-08	Water	Right	Light OFF	11	ChR2	Yoked	2	Left	26.6	34.5865	8	3	96	9.04	39	2.46154	0.229231	1.01	175	184	21	1.79	11	1.90909	0.162727	0.63
1053	F13	7	2021-02-08	Water	Right	Light OFF	11	ChR2	Paired	2	Right	24.6	51.2195	8	3	194	11.85	56	3.46429	0.211071	0.84	292	116	26	2.18	11	2.36364	0.198182	0.6
1054	F15	16	2021-02-08	Water	Right	Light OFF	11	eGFP	Yoked	2	Left	23.2	39.2241	8	3	500	37.55	73	6.84932	0.497123	2.12	132	91	7	0.65	4	1.75	0.1625	0.35
1055	F16	17	2021-02-08	Water	Left	Light OFF	11	eGFP	Paired	2	Right	22.9	33.6245	8	3	216	5.9	73	2.9589	0.08	0.56	52	91	34	1	14	2.42857	0.0714286	0.4
1058	F9	5	2021-02-09	Water	Right	Light OFF	12	ChR2	Yoked	2	Left	26.6	21.8045	8	3	195	13.72	60	3.25	0.228667	1.1	102	78	56	5.32	23	2.43478	0.231304	0.94
1059	F13	7	2021-02-09	Water	Right	Light OFF	12	ChR2	Paired	2	Right	24.6	43.0894	8	3	344	11.77	73	4.71233	0.160548	0.58	146	97	29	1.35	8	3.625	0.16875	0.34
1060	F15	16	2021-02-09	Water	Right	Light OFF	12	eGFP	Yoked	2	Left	23.2	32.7586	8	3	220	20.71	40	5.5	0.51775	2.99	300	163	18	3.64	5	3.6	0.728	1.37
1061	F16	17	2021-02-09	Water	Left	Light OFF	12	eGFP	Paired	2	Right	22.9	30.5677	8	3	224	5.72	73	3.06849	0.0778082	0.48	1566	69	9	0.12	2	4.5	0.06	0.08
1064	F9	5	2021-02-10	Water	Right	Light OFF	13	ChR2	Yoked	2	Left	26.6	38.3459	8	3	254	15.93	87	2.91954	0.182989	1.04	76	81	53	2.67	22	2.40909	0.121364	0.72
1065	F13	7	2021-02-10	Water	Right	Light OFF	13	ChR2	Paired	2	Right	24.9	38.5542	8	3	362	9.16	70	5.17143	0.130857	1.27	209	98	29	0.95	10	2.9	0.095	0.27
1066	F15	16	2021-02-10	Water	Right	Light OFF	13	eGFP	Yoked	2	Left	23.5	31.0638	8	3	148	43.88	38	3.89474	1.08605	3.56	1250	159	33	2.81	4	8.25	0.7025	0.9
1067	F16	17	2021-02-10	Water	Left	Light OFF	13	eGFP	Paired	2	Right	23.1	22.9437	8	3	170	12.3	54	3.14815	0.227593	0.92	180	122	4	0.35	2	2	0.175	0.32
1070	F9	5	2021-02-11	Water	Right	Light OFF	14	ChR2	Yoked	2	Left	26.6	40.2256	8	3	231	14.47	75	3.08	0.1928	0.92	62	94	50	2.36	21	2.38095	0.112381	0.51
1071	F13	7	2021-02-11	Water	Right	Light OFF	14	ChR2	Paired	2	Right	24.9	45.3815	8	3	139	10.14	53	2.62264	0.191321	0.62	678	122	14	1.69	5	2.8	0.338	0.62
1072	F15	16	2021-02-11	Water	Right	Light OFF	14	eGFP	Yoked	2	Left	23.5	33.617	8	3	238	36.71	46	5.17391	0.797609	3.1	1020	136	52	7.48	9	5.77778	0.831111	1.72
1073	F16	17	2021-02-11	Water	Left	Light OFF	14	eGFP	Paired	2	Right	23.1	27.2727	8	3	199	7.94	60	3.31667	0.126	0.74	275	104	7	0.24	3	2.33333	0.08	0.23
1076	F9	5	2021-02-12	Water	Right	Light OFF	15	ChR2	Yoked	4	Left	27	50	8	3	275	25.67	84	3.27381	0.297976	2.49	284	138	6	0.08	3	2	0.0266667	0.04
1077	F13	7	2021-02-12	Water	Right	Light OFF	15	ChR2	Paired	4	Right	25.6	76.1719	8	3	739	27.41	147	5.02721	0.186395	0.73	971	86	36	0.85	8	4.5	0.10625	0.24
1078	F15	16	2021-02-12	Water	Right	Light OFF	15	eGFP	Yoked	4	Left	23.7	61.6034	8	3	209	66.68	54	3.87037	1.23296	3.35	476	256	48	8.98	10	4.8	0.898	2.15
1079	F16	17	2021-02-12	Water	Left	Light OFF	15	eGFP	Paired	4	Right	23.7	61.6034	8	3	578	29.76	169	3.42012	0.172781	1.3	44	84	7	0.16	5	1.4	0.032	0.06
1082	F9	5	2021-02-15	Water	Right	Light ON	16	ChR2	Yoked	2	Left	26.7	35.9551	8	4	266	18.47	66	4.0303	0.279394	1.66	200	102	55	3.84	15	3.66667	0.256	1.66
1083	F13	7	2021-02-15	Water	Right	Light ON	16	ChR2	Paired	2	Right	24.7	32.3887	8	4	356	9.64	64	5.5625	0.15	0.82	426	107	136	3.29	24	5.66667	0.137083	0.49
1084	F15	16	2021-02-15	Water	Right	Light ON	16	eGFP	Yoked	2	Left	23.9	38.4937	8	4	187	18.07	37	5.05405	0.486757	2.6	954	156	65	2.46	10	6.5	0.246	0.73
1085	F16	17	2021-02-15	Water	Left	Light ON	16	eGFP	Paired	2	Right	23.2	18.1034	8	4	111	11.16	39	2.84615	0.285128	1.23	1756	142	14	0.77	5	2.8	0.154	0.32
1088	F9	5	2021-02-16	Water	Right	Light ON	17	ChR2	Yoked	2	Left	26.7	35.206	8	4	264	15.89	75	3.52	0.211467	1.52	296	91	16	0.63	7	2.28571	0.09	0.41
1089	F13	7	2021-02-16	Water	Right	Light ON	17	ChR2	Paired	2	Right	24.7	42.1053	8	4	372	7.98	83	4.48193	0.0961446	0.56	292	83	106	2.24	22	4.81818	0.101818	0.4
1090	F15	16	2021-02-16	Water	Right	Light ON	17	eGFP	Yoked	2	Left	23.9	36.8201	8	4	209	37.48	45	4.64444	0.830889	3.65	365	153	63	3.66	11	5.72727	0.332727	1.03
1091	F16	17	2021-02-16	Water	Left	Light ON	17	eGFP	Paired	2	Right	23.2	28.8793	8	4	279	15.69	73	3.82192	0.214247	0.95	1526	72	15	0.73	7	2.14286	0.104286	0.35
1094	F9	5	2021-02-17	Water	Right	Light ON	18	ChR2	Yoked	2	Left	26.9	31.5985	8	4	136	19.51	55	2.47273	0.346545	2.9	36	125	16	1.45	8	2	0.18125	0.79
1095	F13	7	2021-02-17	Water	Right	Light ON	18	ChR2	Paired	2	Right	24.9	36.1446	8	4	366	9.44	71	5.15493	0.132817	0.53	258	96	99	3.18	19	5.21053	0.167368	0.52
1096	F15	16	2021-02-17	Water	Right	Light ON	18	eGFP	Yoked	2	Left	24	37.5	8	4	158	44.23	40	3.95	1.1025	3.42	726	157	34	6.45	8	4.25	0.80625	1.63
1097	F16	17	2021-02-17	Water	Left	Light ON	18	eGFP	Paired	2	Right	23.5	80.4255	8	4	723	28.16	185	3.90811	0.151946	0.72	38	38	198	7.9	59	3.35593	0.133898	0.57
1100	F9	5	2021-02-18	Water	Right	Light ON	19	ChR2	Yoked	2	Left	26.9	33.829	8	4	152	9.59	52	2.92308	0.183462	1.18	62	137	27	1.37	14	1.92857	0.0978571	0.3
1101	F13	7	2021-02-18	Water	Right	Light ON	19	ChR2	Paired	2	Right	24.9	30.9237	8	4	83	6.24	41	2.02439	0.152195	4.43	188	163	19	0.62	12	1.58333	0.0516667	0.34
1102	F15	16	2021-02-18	Water	Right	Light ON	19	eGFP	Yoked	2	Left	24	40	8	4	274	27.24	51	5.37255	0.534118	2.09	805	123	29	2.51	7	4.14286	0.358571	0.91
1103	F16	17	2021-02-18	Water	Left	Light ON	19	eGFP	Paired	2	Right	23.5	24.2553	8	4	38	6.76	20	1.9	0.3365	0.91	1662	271	2	0.91	1	2	0.91	0.91
1106	F9	5	2021-02-19	Water	Right	Light ON	20	ChR2	Yoked	4	Left	27	52.2222	8	4	590	30.95	113	5.22124	0.272478	1.39	126	123	18	1.24	8	2.25	0.155	0.48
1107	F13	7	2021-02-19	Water	Right	Light ON	20	ChR2	Paired	4	Right	25.5	61.5686	8	4	525	14.17	124	4.23387	0.114113	2.44	142	115	24	2.74	9	2.66667	0.304444	2.44
1108	F15	16	2021-02-19	Water	Right	Light ON	20	eGFP	Yoked	4	Left	24.8	63.7097	8	4	114	41.64	38	3	1.09316	4.85	2039	332	0	0	0	0	0	0
1109	F16	17	2021-02-19	Water	Left	Light ON	20	eGFP	Paired	4	Right	24.6	66.2602	8	4	871	33.49	210	4.14762	0.159048	2.03	56	65	38	1.59	11	3.45455	0.144545	0.28
1112	F9	5	2021-02-22	Water	Right	Light ON	21	ChR2	Yoked	2	Left	27.4	29.927	8	5	242	10.62	68	3.55882	0.149853	0.73	162	94	76	3.08	23	3.30435	0.133913	0.73
1113	F13	7	2021-02-22	Water	Right	Light ON	21	ChR2	Paired	2	Right	25.3	28.8538	8	5	256	10.3	60	4.26667	0.17	4.08	518	106	99	1.75	25	3.96	0.07	0.28
1114	F15	16	2021-02-22	Water	Right	Light ON	21	eGFP	Yoked	2	Left	25.1	31.8725	8	5	117	12.74	28	4.17857	0.455	2.85	148	185	2	0.09	1	2	0.09	0.09
1115	F16	17	2021-02-22	Water	Left	Light ON	21	eGFP	Paired	2	Right	24.1	29.4606	8	5	100	13.09	54	1.85185	0.237222	1.15	580	111	3	1.01	2	1.5	0.505	0.96
1117	F9	5	2021-02-23	Water	Right	Light ON	22	ChR2	Yoked	2	Left	27.4	26.2774	8	5	263	23.21	80	3.2875	0.290125	2.34	18	90	42	7.49	17	2.47059	0.440588	2.34
1118	F13	7	2021-02-23	Water	Right	Light ON	22	ChR2	Paired	2	Right	25.3	41.502	8	5	657	19.78	99	6.63636	0.199697	0.59	98	69	123	3.19	21	5.85714	0.151905	0.42
1119	F15	16	2021-02-23	Water	Right	Light ON	22	eGFP	Yoked	2	Left	25.1	44.6215	8	5	168	49.57	51	3.29412	0.966471	3.04	1233	117	14	2.18	3	4.66667	0.726667	1.92
1120	F16	17	2021-02-23	Water	Left	Light ON	22	eGFP	Paired	2	Right	24.1	29.8755	8	5	84	18.93	50	1.68	0.3496	1.39	108	142	18	2.35	11	1.63636	0.213636	0.56
1121	F9	5	2021-02-24	Water	Right	Light ON	23	ChR2	Yoked	2	Left	27.6	31.5217	8	5	336	15.59	79	4.25316	0.197089	2.28	20	90	64	2.98	21	3.04762	0.141905	0.58
1122	F13	7	2021-02-24	Water	Right	Light ON	23	ChR2	Paired	2	Right	25.8	34.1085	8	5	399	11.08	70	5.7	0.158143	3	168	99	69	1.33	15	4.6	0.0886667	0.33
1123	F15	16	2021-02-24	Water	Right	Light ON	23	eGFP	Yoked	2	Left	24.9	31.3253	8	5	175	32.1	41	4.26829	0.782927	3.4	1116	147	13	3.37	5	2.6	0.674	1.01
1124	F16	17	2021-02-24	Water	Left	Light ON	23	eGFP	Paired	2	Right	24.2	22.7273	8	5	228	13.41	75	3.04	0.177467	1.03	90	93	31	1.26	9	3.44444	0.14	0.46
1125	F9	5	2021-02-25	Water	Right	Light ON	24	ChR2	Yoked	2	Left	27.6	34.4203	8	5	344	13.7	79	4.35443	0.173418	1.1	106	88	57	2	18	3.16667	0.111111	0.46
1126	F13	7	2021-02-25	Water	Right	Light ON	24	ChR2	Paired	2	Right	25.8	34.8837	8	5	303	9.17	63	4.80952	0.144921	1.08	48	115	54	1.01	13	4.15385	0.0776923	0.25
1127	F15	16	2021-02-25	Water	Right	Light ON	24	eGFP	Yoked	2	Left	24.9	34.9398	8	5	214	27.2	46	4.65217	0.591304	2.35	969	138	11	2.32	3	3.66667	0.773333	1.49
1128	F16	17	2021-02-25	Water	Left	Light ON	24	eGFP	Paired	2	Right	24.2	24.3802	8	5	205	9.85	55	3.72727	0.178182	1.08	1410	95	15	0.77	4	3.75	0.1925	0.47
1129	F9	5	2021-02-26	Water	Right	Light ON	25	ChR2	Yoked	4	Left	27.6	54.3478	8	5	306	26.38	111	2.75676	0.233604	1.91	152	126	25	2.35	12	2.08333	0.195833	0.99
1130	F13	7	2021-02-26	Water	Right	Light ON	25	ChR2	Paired	4	Right	25.1	54.9801	8	5	793	16.79	131	6.05344	0.128015	0.49	108	97	69	1.74	19	3.63158	0.0915789	0.42
1131	F15	16	2021-02-26	Water	Right	Light ON	25	eGFP	Yoked	4	Left	25	54.8	8	5	116	78.89	59	1.9661	1.25983	4.4	1812	211	0	0	0	0	0	0
1132	F16	17	2021-02-26	Water	Left	Light ON	25	eGFP	Paired	4	Right	24.4	54.918	8	5	524	17.3	150	3.49333	0.114733	0.52	68	95	20	0.79	7	2.85714	0.112857	0.38
1133	F9	5	2021-03-01	Water	Right	Light ON	26	ChR2	Yoked	2	Left	28.3	28.2686	8	6	158	14.21	52	3.03846	0.234423	1.95	142	130	16	2.96	7	2.28571	0.422857	1.95
1134	F13	7	2021-03-01	Water	Right	Light ON	26	ChR2	Paired	2	Right	26.2	27.0992	8	6	287	5.84	59	4.86441	0.0984746	0.39	226	120	51	1.22	19	2.68421	0.0642105	0.39
1135	F15	16	2021-03-01	Water	Right	Light ON	26	eGFP	Yoked	2	Left	25.7	26.07	8	6	28	23.5	21	1.33333	1.11667	3.32	198	287	1	0.15	1	1	0.15	0.15
1136	F16	17	2021-03-01	Water	Left	Light ON	26	eGFP	Paired	2	Right	24.4	27.0492	8	6	352	10.2	69	5.10145	0.141594	0.77	482	86	11	0.24	4	2.75	0.06	0.14
1137	F9	5	2021-03-02	Water	Right	Light ON	27	ChR2	Yoked	2	Left	28.3	27.5618	8	6	311	16.29	64	4.85938	0.251406	2.6	160	108	26	3.76	12	2.16667	0.313333	2.6
1138	F13	7	2021-03-02	Water	Right	Light ON	27	ChR2	Paired	2	Right	26.2	33.9695	8	6	373	7.92	66	5.65152	0.11303	0.65	220	98	21	0.66	10	2.1	0.066	0.21
1139	F15	16	2021-03-02	Water	Right	Light ON	27	eGFP	Yoked	2	Left	25.7	34.2412	8	6	325	34.29	62	5.24194	0.553065	2.03	94	115	66	9.36	15	4.4	0.624	2
1140	F16	17	2021-03-02	Water	Left	Light ON	27	eGFP	Paired	2	Right	24.4	28.6885	8	6	382	12.3	88	4.34091	0.139773	0.95	138	80	73	3.07	14	5.21429	0.219286	0.95
1141	F9	5	2021-03-03	Water	Right	Light ON	28	ChR2	Yoked	2	Left	28.7	32.7526	8	6	119	15.92	46	2.58696	0.338913	1.88	114	150	11	2.27	4	2.75	0.5675	1.29
1142	F13	7	2021-03-03	Water	Right	Light ON	28	ChR2	Paired	2	Right	26.3	34.6008	8	6	551	16.73	87	6.33333	0.192069	1.26	340	75	48	1.2	10	4.8	0.12	0.33
1143	F15	16	2021-03-03	Water	Right	Light ON	28	eGFP	Yoked	2	Left	25.5	36.4706	8	6	94	37.23	29	3.24138	1.28379	3.67	780	215	1	0.09	1	1	0.09	0.09
1144	F16	17	2021-03-03	Water	Left	Light ON	28	eGFP	Paired	2	Right	24.6	24.3902	8	6	277	8.96	72	3.84722	0.123333	0.54	80	100	22	0.94	9	2.44444	0.104444	0.33
1145	F9	5	2021-03-04	Water	Right	Light ON	29	ChR2	Yoked	2	Left	28.7	28.5714	8	6	206	9.39	71	2.90141	0.128732	0.63	36	96	27	2.26	14	1.92857	0.161429	0.63
1146	F13	7	2021-03-04	Water	Right	Light ON	29	ChR2	Paired	2	Right	26.3	33.4601	8	6	587	13.95	89	6.59551	0.155506	0.66	196	75	43	1.18	13	3.30769	0.0907692	0.34
1147	F15	16	2021-03-04	Water	Right	Light ON	29	eGFP	Yoked	2	Left	25.5	33.7255	8	6	203	44.3	44	4.61364	1.00682	3.05	1066	137	4	2.45	1	4	2.45	2.45
1148	F16	17	2021-03-04	Water	Left	Light ON	29	eGFP	Paired	2	Right	24.6	25.2033	8	6	40	7.13	27	1.48148	0.23037	0.68	38	238	1	0.03	1	1	0.03	0.03
1149	F9	5	2021-03-05	Water	Right	Light ON	30	ChR2	Yoked	4	Left	28.6	46.8531	8	6	84	15.71	50	1.68	0.2904	1.13	194	272	14	2.1	9	1.55556	0.233333	0.66
1150	F13	7	2021-03-05	Water	Right	Light ON	30	ChR2	Paired	4	Right	26.5	55.0943	8	6	858	25	169	5.07692	0.146982	0.79	204	83	8	0.4	5	1.6	0.08	0.26
1151	F15	16	2021-03-05	Water	Right	Light ON	30	eGFP	Yoked	4	Left	26	49.2308	8	6	446	50.36	77	5.79221	0.652468	2.93	1060	141	49	3.67	9	5.44444	0.407778	0.87
1152	F16	17	2021-03-05	Water	Left	Light ON	30	eGFP	Paired	4	Right	24.7	59.1093	8	6	823	28.18	188	4.37766	0.149681	1.2	62	74	60	1.6	12	5	0.133333	0.62
1153	F34	3	2021-03-29	Water	Left	Light OFF	1	eGFP	Paired	2	Left	26.8	20.1493	9	1	170	38.17	78	2.17949	0.453974	2.34	436	84	32	6.43	15	2.13333	0.428667	1.88
1154	F33	15	2021-03-29	Water	Right	Light OFF	1	eGFP	Yoked	2	Right	20.9	2.87081	9	1
1155	F35	26	2021-03-29	Water	Left	Light OFF	1	eGFP	Paired	2	Left	24.9	2.81124	9	1	2	0.03	2	1	0.015	0.02	6700	186	0	0	0	0	0	0
1156	F30	32	2021-03-29	Water	Left	Light OFF	1	eGFP	Yoked	2	Right	25.2	50.3968	9	1	33	2.55	11	3	0.177273	0.44	2002	443	0	0	0	0	0	0
1157	F31	34	2021-03-29	Water	Right	Light OFF	1	eGFP	Paired	2	Left	25.2	26.5873	9	1	107	21.48	42	2.54762	0.508095	2.36	396	148	14	2.5	9	1.55556	0.277778	0.98
1158	F32	36	2021-03-29	Water	Left	Light OFF	1	eGFP	Yoked	2	Right	24.6	24.3902	9	1	185	17.73	59	3.13559	0.296271	1.06	869	107	23	1.7	7	3.28571	0.242857	0.73
1159	F34	3	2021-03-30	Water	Left	Light OFF	2	eGFP	Paired	2	Left	26.8	19.7761	9	1	188	40.46	65	2.89231	0.572615	2.88	150	107	10	1.68	8	1.25	0.21	1.01
1160	F33	15	2021-03-30	Water	Right	Light OFF	2	eGFP	Yoked	2	Right	20.9	2.87081	9	1
1161	F35	26	2021-03-30	Water	Left	Light OFF	2	eGFP	Paired	2	Left	24.9	3.21285	9	1	9	1.65	6	1.5	0.275	0.73	396	1079	3	0.27	3	1	0.09	0.17
1162	F30	32	2021-03-30	Water	Left	Light OFF	2	eGFP	Yoked	2	Right	25.2	37.6984	9	1	102	11.37	34	3	0.324412	1.18	2726	128	0	0	0	0	0	0
1163	F31	34	2021-03-30	Water	Right	Light OFF	2	eGFP	Paired	2	Left	25.2	26.9841	9	1	270	26.64	57	4.73684	0.456316	2.32	338	107	10	1.4	5	2	0.28	0.63
1164	F32	36	2021-03-30	Water	Left	Light OFF	2	eGFP	Yoked	2	Right	24.6	18.6992	9	1	184	25.45	51	3.60784	0.496275	1.5	88	140	14	0.63	7	2	0.09	0.23
1165	F34	3	2021-03-31	Water	Left	Light OFF	3	eGFP	Paired	2	Left	26.8	14.1791	9	1	156	24.61	50	3.12	0.4902	2.5	812	116	5	0.25	4	1.25	0.0625	0.22
1166	F33	15	2021-03-31	Water	Right	Light OFF	3	eGFP	Yoked	2	Right	21.5	1.86047	9	1	3	0.06	2	1.5	0.03	0.05	6684	4	0	0	0	0	0	0
1167	F35	26	2021-03-31	Water	Left	Light OFF	3	eGFP	Paired	2	Left	25.4	16.9291	9	1	254	79.39	88	2.88636	0.899659	2.78	56	80	25	4.92	7	3.57143	0.702857	1.81
1168	F30	32	2021-03-31	Water	Left	Light OFF	3	eGFP	Yoked	2	Right	25.2	21.0317	9	1	209	16.4	63	3.31746	0.259524	1.05	458	96	6	0.18	3	2	0.06	0.09
1169	F31	34	2021-03-31	Water	Right	Light OFF	3	eGFP	Paired	2	Left	25.6	20.7031	9	1	189	7.47	36	5.25	0.206667	0.54	526	181	44	2.02	10	4.4	0.202	0.52
1170	F32	36	2021-03-31	Water	Left	Light OFF	3	eGFP	Yoked	2	Right	24.9	20.0803	9	1	172	17.71	46	3.73913	0.384783	1.26	158	147	1	0.05	1	1	0.05	0.05
1171	F34	3	2021-04-01	Water	Left	Light OFF	4	eGFP	Paired	2	Left	26.8	19.403	9	1	197	29.25	57	3.45614	0.512456	2.04	1082	108	35	8.16	16	2.1875	0.51	1.74
1172	F33	15	2021-04-01	Water	Right	Light OFF	4	eGFP	Yoked	2	Right	21.5	5.11628	9	1
1173	F35	26	2021-04-01	Water	Left	Light OFF	4	eGFP	Paired	2	Left	25.4	33.4646	9	1	143	59.14	53	2.69811	1.04453	3.56	24	134	29	17.41	19	1.52632	0.916316	3.26
1174	F30	32	2021-04-01	Water	Left	Light OFF	4	eGFP	Yoked	2	Right	25.2	21.8254	9	1	174	42.26	46	3.78261	0.872609	3.56	108	150	17	2.06	8	2.125	0.2575	1.14
1175	F31	34	2021-04-01	Water	Right	Light OFF	4	eGFP	Paired	2	Left	25.6	26.5625	9	1	176	6.91	42	4.19048	0.16381	0.84	82	171	10	0.69	6	1.66667	0.115	0.55
1176	F32	36	2021-04-01	Water	Left	Light OFF	4	eGFP	Yoked	2	Right	24.9	32.5301	9	1	233	29.72	58	4.01724	0.512414	2.78	354	109	4	0.07	3	1.33333	0.0233333	0.05
1177	F34	3	2021-04-02	Water	Left	Light OFF	5	eGFP	Paired	4	Left	26.8	50.3731	9	1	621	55.52	131	4.74046	0.423206	3.12	574	101	11	1.09	5	2.2	0.218	0.55
1178	F33	15	2021-04-02	Water	Right	Light OFF	5	eGFP	Yoked	4	Right	21.5	33.9535	9	1	367	19.41	93	3.94624	0.208495	1.17	10870	36	0	0	0	0	0	0
1179	F35	26	2021-04-02	Water	Left	Light OFF	5	eGFP	Paired	4	Left	25.4	66.5354	9	1	324	110.39	99	3.27273	1.08576	4.08	98	142	42	8.35	16	2.625	0.521875	1.32
1180	F30	32	2021-04-02	Water	Left	Light OFF	5	eGFP	Yoked	4	Right	25.2	44.4444	9	1	554	61.92	134	4.13433	0.458955	3.27	408	103	3	0.12	2	1.5	0.06	0.1
1181	F31	34	2021-04-02	Water	Right	Light OFF	5	eGFP	Paired	4	Left	25.6	52.7344	9	1	268	8.6	72	3.72222	0.118611	0.68	38	197	2	0.05	2	1	0.025	0.03
1182	F32	36	2021-04-02	Water	Left	Light OFF	5	eGFP	Yoked	4	Right	24.9	72.6908	9	1	431	56.44	111	3.88288	0.506937	2.72	148	123	17	1.15	6	2.83333	0.191667	0.36
1183	F34	3	2021-04-05	Water	Left	Light OFF	6	eGFP	Paired	2	Left	27.5	22.1818	9	2	453	46.13	98	4.62245	0.469184	2.2	356	66	146	14.62	32	4.5625	0.456875	2.2
1184	F33	15	2021-04-05	Water	Right	Light OFF	6	eGFP	Yoked	2	Right	22.7	25.1101	9	2	344	34.47	74	4.64865	0.463784	1.89	1292	74	9	0.94	4	2.25	0.235	0.67
1185	F35	26	2021-04-05	Water	Left	Light OFF	6	eGFP	Paired	2	Left	25.8	25.969	9	2	154	25.81	39	3.94872	0.661795	2.4	90	178	6	0.98	4	1.5	0.245	0.41
1186	F30	32	2021-04-05	Water	Left	Light OFF	6	eGFP	Yoked	2	Right	25.4	15.3543	9	2	185	32.62	49	3.77551	0.645918	2.72	4	145	15	0.97	6	2.5	0.161667	0.5
1187	F31	34	2021-04-05	Water	Right	Light OFF	6	eGFP	Paired	2	Left	25.6	23.4375	9	2	135	10.76	35	3.85714	0.306857	1.3	24	206	28	0.98	9	3.11111	0.108889	0.7
1188	F32	36	2021-04-05	Water	Left	Light OFF	6	eGFP	Yoked	2	Right	25.7	31.1284	9	2	148	14.6	37	4	0.391351	1	452	185	10	0.99	3	3.33333	0.33	0.91
1189	F34	3	2021-04-06	Water	Left	Light OFF	7	eGFP	Paired	2	Left	27.5	33.0909	9	2	33	14.54	21	1.57143	0.690476	12.27	226	347	5	0.12	5	1	0.024	0.05
1190	F33	15	2021-04-06	Water	Right	Light OFF	7	eGFP	Yoked	2	Right	22.7	39.207	9	2	487	24.92	81	6.01235	0.307407	1.11	1072	71	77	3.88	20	3.85	0.194	1.09
1191	F35	26	2021-04-06	Water	Left	Light OFF	7	eGFP	Paired	2	Left	25.8	25.5814	9	2	242	24.48	46	5.26087	0.53087	2.65	76	146	12	1.13	4	3	0.2825	0.74
1192	F30	32	2021-04-06	Water	Left	Light OFF	7	eGFP	Yoked	2	Right	25.4	23.622	9	2	123	23.38	41	3	0.569756	4.33	695	162	14	1.17	4	3.5	0.2925	0.46
1193	F31	34	2021-04-06	Water	Right	Light OFF	7	eGFP	Paired	2	Left	25.6	23.0469	9	2	115	5.18	25	4.6	0.2028	0.41	44	273	1	0.01	1	1	0.01	0.01
1194	F32	36	2021-04-06	Water	Left	Light OFF	7	eGFP	Yoked	2	Right	25.7	33.0739	9	2	154	16.58	44	3.5	0.376364	1.26	1194	128	10	0.67	5	2	0.134	0.33
1195	F34	3	2021-04-07	Water	Left	Light OFF	8	eGFP	Paired	2	Left	28	16.4286	9	2
1196	F33	15	2021-04-07	Water	Right	Light OFF	8	eGFP	Yoked	2	Right	22.8	19.7368	9	2	226	10.94	34	6.64706	0.321765	1.98	2892	125	0	0	0	0	0	0
1197	F35	26	2021-04-07	Water	Left	Light OFF	8	eGFP	Paired	2	Left	26.6	33.8346	9	2	265	46.04	96	2.76042	0.464479	3.48	240	70	30	5.06	11	2.72727	0.46	1.38
1198	F30	32	2021-04-07	Water	Left	Light OFF	8	eGFP	Yoked	2	Right	25.9	24.7104	9	2	238	48.29	66	3.60606	0.731667	3.41	34	109	6	0.51	3	2	0.17	0.32
1199	F31	34	2021-04-07	Water	Right	Light OFF	8	eGFP	Paired	2	Left	26.1	13.7931	9	2	86	8.56	24	3.58333	0.356667	1.03	30	306	14	2.55	5	2.8	0.51	0.91
1200	F32	36	2021-04-07	Water	Left	Light OFF	8	eGFP	Yoked	2	Right	26.3	32.3194	9	2	261	28.44	55	4.74545	0.516545	1.54	1550	102	18	0.94	4	4.5	0.235	0.48
1201	F34	3	2021-04-08	Water	Left	Light OFF	9	eGFP	Paired	2	Left	28	21.7857	9	2	203	7	44	4.61364	0.158636	0.79	360	153	22	1.12	6	3.66667	0.186667	0.79
1202	F33	15	2021-04-08	Water	Right	Light OFF	9	eGFP	Yoked	2	Right	22.8	30.2632	9	2	348	18.96	51	6.82353	0.371765	2.95	950	124	65	2.85	11	5.90909	0.259091	0.97
1203	F35	26	2021-04-08	Water	Left	Light OFF	9	eGFP	Paired	2	Left	26.6	27.8195	9	2	197	40.18	47	4.19149	0.85383	3.07	548	143	2	0.05	1	2	0.05	0.05
1204	F30	32	2021-04-08	Water	Left	Light OFF	9	eGFP	Yoked	2	Right	25.9	17.7606	9	2	65	23.02	19	3.42105	1.21158	3.84	1354	312	27	1.41	6	4.5	0.235	0.62
1205	F31	34	2021-04-08	Water	Right	Light OFF	9	eGFP	Paired	2	Left	26.1	20.6897	9	2	168	12.13	36	4.66667	0.336667	0.95	102	197	20	1.06	5	4	0.212	0.95
1206	F32	36	2021-04-08	Water	Left	Light OFF	9	eGFP	Yoked	2	Right	26.3	37.6426	9	2	190	35.22	56	3.39286	0.62875	2.64	56	127	3	2.16	3	1	0.72	1.71
1207	F34	3	2021-04-09	Water	Left	Light OFF	10	eGFP	Paired	4	Left	28	53.5714	9	2	386	22.35	115	3.35652	0.194261	2.41	458	103	50	4.52	19	2.63158	0.237895	2.41
1208	F33	15	2021-04-09	Water	Right	Light OFF	10	eGFP	Yoked	4	Right	22.8	51.7544	9	2	420	25.13	82	5.12195	0.306463	2	488	157	3	0.04	2	1.5	0.02	0.03
1209	F35	26	2021-04-09	Water	Left	Light OFF	10	eGFP	Paired	4	Left	26.6	49.2481	9	2	596	76.49	118	5.05085	0.644407	2.83	1536	93	15	1.5	4	3.75	0.375	0.62
1210	F30	32	2021-04-09	Water	Left	Light OFF	10	eGFP	Yoked	4	Right	25.9	45.9459	9	2	373	50.1	80	4.6625	0.598125	3.05	2942	108	0	0	0	0	0	0
1211	F31	34	2021-04-09	Water	Right	Light OFF	10	eGFP	Paired	4	Left	26.1	59.387	9	2	373	16.6	73	5.10959	0.225342	0.62	340	192	1	0	1	1	0	0
1212	F32	36	2021-04-09	Water	Left	Light OFF	10	eGFP	Yoked	4	Right	26.3	71.4829	9	2	555	48.63	122	4.54918	0.385082	2.54	524	112	11	1.28	4	2.75	0.32	0.65
1213	F34	3	2021-04-12	Water	Left	Light OFF	11	eGFP	Paired	2	Left	28.8	27.4306	9	3	78	7.77	40	1.95	0.18775	0.82	1654	134	8	1.72	3	2.66667	0.573333	0.82
1214	F33	15	2021-04-12	Water	Right	Light OFF	11	eGFP	Yoked	2	Right	24	24.5833	9	3	185	13.45	35	5.28571	0.383714	1.83	500	191	41	1.11	8	5.125	0.13875	0.38
1215	F35	26	2021-04-12	Water	Left	Light OFF	11	eGFP	Paired	2	Left	26.7	35.206	9	3	312	54.03	65	4.8	0.820462	3.12	76	109	50	5.82	8	6.25	0.7275	1.68
1216	F30	32	2021-04-12	Water	Left	Light OFF	11	eGFP	Yoked	2	Right	26.5	25.283	9	3	210	53.76	56	3.75	0.952679	3.52	784	111	5	0.31	3	1.66667	0.103333	0.22
1217	F31	34	2021-04-12	Water	Right	Light OFF	11	eGFP	Paired	2	Left	26.5	23.3962	9	3	101	4.13	24	4.20833	0.172083	0.41	2200	186	0	0	0	0	0	0
1218	F32	36	2021-04-12	Water	Left	Light OFF	11	eGFP	Yoked	2	Right	25.9	30.5019	9	3	176	25.4	51	3.45098	0.481961	2.02	212	133	25	2.71	8	3.125	0.33875	0.76
1219	F34	3	2021-04-13	Water	Left	Light OFF	12	eGFP	Paired	2	Left	28.8	24.6528	9	3	292	9.12	54	5.40741	0.168333	0.59	484	121	46	1.09	7	6.57143	0.155714	0.35
1220	F33	15	2021-04-13	Water	Right	Light OFF	12	eGFP	Yoked	2	Right	24	24.5833	9	3	380	21.93	54	7.03704	0.406111	1.42	2384	86	0	0	0	0	0	0
1221	F35	26	2021-04-13	Water	Left	Light OFF	12	eGFP	Paired	2	Left	26.7	35.5805	9	3	313	50.85	71	4.40845	0.67831	3.1	64	97	78	10.79	20	3.9	0.5395	1.17
1222	F30	32	2021-04-13	Water	Left	Light OFF	12	eGFP	Yoked	2	Right	26.5	19.2453	9	3	266	43.39	53	5.01887	0.788113	2.75	1742	75	17	1.74	4	4.25	0.435	1.14
1223	F31	34	2021-04-13	Water	Right	Light OFF	12	eGFP	Paired	2	Left	26.5	18.8679	9	3	105	8.23	30	3.5	0.274333	0.86	2088	150	0	0	0	0	0	0
1224	F32	36	2021-04-13	Water	Left	Light OFF	12	eGFP	Yoked	2	Right	25.9	34.749	9	3	165	36.76	40	4.125	0.919	3.04	1646	133	1	1.07	1	1	1.07	1.07
1225	F34	3	2021-04-14	Water	Left	Light OFF	13	eGFP	Paired	2	Left	28.7	36.9338	9	3	129	14.76	47	2.74468	0.309362	2.2	456	131	15	0.96	7	2.14286	0.137143	0.36
1226	F33	15	2021-04-14	Water	Right	Light OFF	13	eGFP	Yoked	2	Right	24.3	25.5144	9	3	248	17.76	42	5.90476	0.422857	2.14	2320	110	0	0	0	0	0	0
1227	F35	26	2021-04-14	Water	Left	Light OFF	13	eGFP	Paired	2	Left	27.3	36.63	9	3	321	28.67	65	4.93846	0.441077	2.62	364	105	56	4.08	11	5.09091	0.370909	0.82
1228	F30	32	2021-04-14	Water	Left	Light OFF	13	eGFP	Yoked	2	Right	26.6	32.7068	9	3	292	30.61	60	4.86667	0.460167	2.59	1643	91	2	0.17	1	2	0.17	0.17
1229	F31	34	2021-04-14	Water	Right	Light OFF	13	eGFP	Paired	2	Left	27.1	22.1402	9	3	144	3.92	34	4.23529	0.115294	0.58	46	207	6	0.18	3	2	0.06	0.09
1230	F32	36	2021-04-14	Water	Left	Light OFF	13	eGFP	Yoked	2	Right	26.5	38.1132	9	3	200	35.54	62	3.22581	0.572903	1.93	50	116	67	11.66	21	3.19048	0.555238	1.93
1231	F34	3	2021-04-15	Water	Left	Light OFF	14	eGFP	Paired	2	Left	28.7	28.223	9	3	226	15.59	51	4.43137	0.305686	1.25	510	132	11	1.32	6	1.83333	0.22	1
1232	F33	15	2021-04-15	Water	Right	Light OFF	14	eGFP	Yoked	2	Right	24.3	23.8683	9	3	8	1.19	6	1.33333	0.198333	0.32	3980	228	0	0	0	0	0	0
1233	F35	26	2021-04-15	Water	Left	Light OFF	14	eGFP	Paired	2	Left	27.3	39.1941	9	3	345	34.96	67	5.14925	0.521194	2.22	142	106	18	3.95	10	1.8	0.395	1.23
1234	F30	32	2021-04-15	Water	Left	Light OFF	14	eGFP	Yoked	2	Right	26.6	26.3158	9	3	305	57.64	62	4.91935	0.917903	2.94	48	116	52	6.29	11	4.72727	0.571818	1.37
1235	F31	34	2021-04-15	Water	Right	Light OFF	14	eGFP	Paired	2	Left	27.1	53.5055	9	3	115	9.69	34	3.38235	0.282353	1.59	40	204	29	4.71	11	2.63636	0.428182	1.59
1236	F32	36	2021-04-15	Water	Left	Light OFF	14	eGFP	Yoked	2	Right	26.5	36.6038	9	3	167	46.29	51	3.27451	0.901569	3.14	174	140	16	4.87	7	2.28571	0.695714	1.69
1237	F34	3	2021-04-16	Water	Left	Light OFF	15	eGFP	Paired	4	Left	28.7	66.2021	9	3	551	29.17	125	4.408	0.23304	1.71	568	107	16	1.9	5	3.2	0.38	1.37
1238	F33	15	2021-04-16	Water	Right	Light OFF	15	eGFP	Yoked	4	Right	24.3	56.7901	9	3	695	35.79	100	6.95	0.3575	1.64	594	133	34	1.37	3	11.3333	0.456667	0.59
1239	F35	26	2021-04-16	Water	Left	Light OFF	15	eGFP	Paired	4	Left	27.3	61.1722	9	3	659	74.2	130	5.06923	0.570462	3.23	350	92	9	1.56	4	2.25	0.39	0.93
1240	F30	32	2021-04-16	Water	Left	Light OFF	15	eGFP	Yoked	4	Right	26.6	55.2632	9	3	516	116.5	128	4.03125	0.906953	2.7	220	100	68	15.4	19	3.57895	0.810526	2.2
1241	F31	34	2021-04-16	Water	Right	Light OFF	15	eGFP	Paired	4	Left	27.1	51.6605	9	3	323	11.53	82	3.93902	0.140244	0.66	512	167	4	0.26	2	2	0.13	0.24
1242	F32	36	2021-04-16	Water	Left	Light OFF	15	eGFP	Yoked	4	Right	26.5	62.2642	9	3	318	63.38	87	3.65517	0.70931	2.94	70	163	20	1.96	7	2.85714	0.28	0.78
1243	F34	3	2021-04-19	Water	Left	Light ON	16	eGFP	Paired	2	Left	29.5	23.3898	9	4	257	11.21	52	4.94231	0.215192	0.63	236	135	37	1.38	8	4.625	0.1725	0.53
1244	F33	15	2021-04-19	Water	Right	Light ON	16	eGFP	Yoked	2	Right	25	19.6	9	4	175	6.94	32	5.46875	0.216875	0.66	1484	183	18	1.12	5	3.6	0.224	0.61
1245	F35	26	2021-04-19	Water	Left	Light ON	16	eGFP	Paired	2	Left	27	25.1852	9	4	155	25.58	50	3.1	0.5106	3.13	426	136	13	3.16	7	1.85714	0.451429	1.18
1246	F30	32	2021-04-19	Water	Left	Light ON	16	eGFP	Yoked	2	Right	27.3	26.0073	9	4	126	23.53	35	3.6	0.672286	2.12	1216	133	1	0.11	1	1	0.11	0.11
1247	F31	34	2021-04-19	Water	Right	Light ON	16	eGFP	Paired	2	Left	27.4	13.5036	9	4	70	3.02	23	3.04348	0.131304	0.34	1954	231	0	0	0	0	0	0
1248	F32	36	2021-04-19	Water	Left	Light ON	16	eGFP	Yoked	2	Right	26.4	26.8939	9	4	172	24.24	38	4.52632	0.597632	3.35	534	176	8	0.49	4	2	0.1225	0.21
1249	F34	3	2021-04-20	Water	Left	Light ON	17	eGFP	Paired	2	Left	29.5	30.5085	9	4	41	4.17	27	1.51852	0.13963	0.89	406	250	13	2.06	8	1.625	0.2575	0.86
1250	F33	15	2021-04-20	Water	Right	Light ON	17	eGFP	Yoked	2	Right	25	20.4	9	4	221	12.28	40	5.525	0.307	1.31	226	171	41	1.84	6	6.83333	0.306667	0.93
1251	F35	26	2021-04-20	Water	Left	Light ON	17	eGFP	Paired	2	Left	27	25.9259	9	4	79	18.14	37	2.13514	0.448378	4.08	62	186	10	0.65	8	1.25	0.08125	0.2
1252	F30	32	2021-04-20	Water	Left	Light ON	17	eGFP	Yoked	2	Right	27.3	24.1758	9	4	255	40.67	59	4.32203	0.689322	2.65	890	102	25	4.58	6	4.16667	0.763333	1.87
1253	F31	34	2021-04-20	Water	Right	Light ON	17	eGFP	Paired	2	Left	27.4	21.8978	9	4	95	4.32	32	2.96875	0.133437	0.54	166	217	13	0.96	4	3.25	0.24	0.44
1254	F32	36	2021-04-20	Water	Left	Light ON	17	eGFP	Yoked	2	Right	26.4	29.9242	9	4	167	29.69	55	3.03636	0.537091	2.24	90	126	30	3.2	10	3	0.32	1.31
1255	F34	3	2021-04-21	Water	Left	Light ON	18	eGFP	Paired	2	Left	29.7	28.2828	9	4	152	5.77	43	3.53488	0.134186	0.63	320	163	22	0.92	10	2.2	0.092	0.39
1256	F33	15	2021-04-21	Water	Right	Light ON	18	eGFP	Yoked	2	Right	25.4	18.1102	9	4	166	5.76	35	4.74286	0.164571	0.7	322	202	19	0.52	3	6.33333	0.173333	0.3
1257	F35	26	2021-04-21	Water	Left	Light ON	18	eGFP	Paired	2	Left	27.5	28	9	4	216	19.09	64	3.375	0.29625	1.41	182	108	23	2.1	11	2.09091	0.190909	0.63
1258	F30	32	2021-04-21	Water	Left	Light ON	18	eGFP	Yoked	2	Right	27.4	27.0073	9	4	172	29.66	46	3.73913	0.62087	2.69	1077	132	1	0.04	1	1	0.04	0.04
1259	F31	34	2021-04-21	Water	Right	Light ON	18	eGFP	Paired	2	Left	27.6	15.2174	9	4	87	6.07	27	3.22222	0.224815	0.84	160	265	14	1.15	6	2.33333	0.191667	0.43
1260	F32	36	2021-04-21	Water	Left	Light ON	18	eGFP	Yoked	2	Right	26.7	23.221	9	4	79	14.52	24	3.29167	0.592083	2.03	100	264	1	0.17	1	1	0.17	0.17
1261	F34	3	2021-04-22	Water	Left	Light ON	19	eGFP	Paired	2	Left	29.7	23.9057	9	4	158	6.43	42	3.7619	0.153095	0.99	686	156	14	1.21	6	2.33333	0.201667	0.4
1262	F33	15	2021-04-22	Water	Right	Light ON	19	eGFP	Yoked	2	Right	25.4	8.66142	9	4	138	9.96	32	4.3125	0.31125	2.58	582	188	12	0.11	3	4	0.0366667	0.05
1263	F35	26	2021-04-22	Water	Left	Light ON	19	eGFP	Paired	2	Left	27.5	31.6364	9	4	226	20.23	70	3.22857	0.284714	1.49	70	96	40	4.04	14	2.85714	0.288571	1.49
1264	F30	32	2021-04-22	Water	Left	Light ON	19	eGFP	Yoked	2	Right	27.4	28.4672	9	4	334	29.92	65	5.13846	0.459846	2.92	671	101	3	0.37	1	3	0.37	0.37
1265	F31	34	2021-04-22	Water	Right	Light ON	19	eGFP	Paired	2	Left	27.6	10.1449	9	4	67	2.02	23	2.91304	0.0869565	0.29	210	308	6	0.32	2	3	0.16	0.29
1266	F32	36	2021-04-22	Water	Left	Light ON	19	eGFP	Yoked	2	Right	26.7	35.9551	9	4	274	23.05	54	5.07407	0.426852	1.38	1540	80	35	3.36	8	4.375	0.42	1.08
1267	F34	3	2021-04-23	Water	Left	Light ON	20	eGFP	Paired	4	Left	29.7	77.7778	9	4	380	26.13	115	3.30435	0.220348	1.53	552	119	61	1.75	15	4.06667	0.116667	0.44
1268	F33	15	2021-04-23	Water	Right	Light ON	20	eGFP	Yoked	4	Right	25.4	42.9134	9	4	313	50.71	73	4.28767	0.685205	2.87	316	193	4	0.34	2	2	0.17	0.24
1269	F35	26	2021-04-23	Water	Left	Light ON	20	eGFP	Paired	4	Left	27.5	66.9091	9	4	518	44.22	153	3.38562	0.28902	1.98	22	94	37	2.84	17	2.17647	0.167059	0.62
1270	F30	32	2021-04-23	Water	Left	Light ON	20	eGFP	Yoked	4	Right	27.4	67.1533	9	4	547	131.45	129	4.24031	1.00581	3.22	1369	97	42	7.29	10	4.2	0.729	2.31
1271	F31	34	2021-04-23	Water	Right	Light ON	20	eGFP	Paired	4	Left	27.6	45.2899	9	4	261	9.38	70	3.72857	0.134	0.52	14	202	27	1.36	11	2.45455	0.123636	0.44
1272	F32	36	2021-04-23	Water	Left	Light ON	20	eGFP	Yoked	4	Right	26.7	75.6554	9	4	584	70.4	121	4.82645	0.576446	2.35	66	118	93	11.53	20	4.65	0.5765	1.95
1273	F34	3	2021-04-26	Water	Left	Light ON	21	eGFP	Paired	2	Left	30.2	28.1457	9	5	136	7.8	48	2.83333	0.161667	1.03	676	130	29	2.82	12	2.41667	0.235	0.83
1274	F33	15	2021-04-26	Water	Right	Light ON	21	eGFP	Yoked	2	Right	25.3	5.5336	9	5	28	1.74	8	3.5	0.2175	0.75	60	146	28	1.74	8	3.5	0.2175	0.75
1275	F35	26	2021-04-26	Water	Left	Light ON	21	eGFP	Paired	2	Left	27.3	25.2747	9	5	200	13.31	61	3.27869	0.217377	1.55	180	112	7	0.22	5	1.4	0.044	0.09
1276	F30	32	2021-04-26	Water	Left	Light ON	21	eGFP	Yoked	2	Right	26.9	20.0743	9	5	85	19.64	58	1.46552	0.336207	2.02	40	117	61	15.47	35	1.74286	0.442	2.02
1277	F31	34	2021-04-26	Water	Right	Light ON	21	eGFP	Paired	2	Left	27.9	13.9785	9	5	74	4.62	24	3.08333	0.1925	0.87	278	297	5	0.32	3	1.66667	0.106667	0.29
1278	F32	36	2021-04-26	Water	Left	Light ON	21	eGFP	Yoked	2	Right	27.5	33.8182	9	5	306	18.72	58	5.27586	0.322759	2.53	216	119	41	2.4	12	3.41667	0.2	0.42
1279	F34	3	2021-04-27	Water	Left	Light ON	22	eGFP	Paired	2	Left	30.2	33.7748	9	5	176	7.78	53	3.32075	0.146792	1.02	464	124	30	1.82	11	2.72727	0.165455	0.77
1280	F33	15	2021-04-27	Water	Right	Light ON	22	eGFP	Yoked	2	Right	25.3	5.5336	9	5	61	2.19	11	5.54545	0.199091	0.85	350	464	2	0.02	1	2	0.02	0.02
1281	F35	26	2021-04-27	Water	Left	Light ON	22	eGFP	Paired	2	Left	27.3	23.0769	9	5	163	17.53	60	2.71667	0.291667	1.6	70	117	37	7.88	18	2.05556	0.437778	1.6
1282	F30	32	2021-04-27	Water	Left	Light ON	22	eGFP	Yoked	2	Right	26.9	28.2528	9	5	342	44.36	79	4.32911	0.535823	3.33	678	72	16	1.47	6	2.66667	0.245	0.45
1283	F31	34	2021-04-27	Water	Right	Light ON	22	eGFP	Paired	2	Left	27.9	7.8853	9	5	73	5.41	19	3.84211	0.284737	1.17	136	367	23	1.14	8	2.875	0.1425	0.42
1284	F32	36	2021-04-27	Water	Left	Light ON	22	eGFP	Yoked	2	Right	27.5	32	9	5	154	37.71	48	3.20833	0.780417	3.88	100	149	20	1.84	7	2.85714	0.262857	0.86
1285	F34	3	2021-04-28	Water	Left	Light ON	23	eGFP	Paired	2	Left	30.2	33.4437	9	5	101	6.63	44	2.29545	0.147727	1.22	162	158	12	1.07	7	1.71429	0.152857	0.33
1286	F33	15	2021-04-28	Water	Right	Light ON	23	eGFP	Yoked	2	Right	25.3	9.48617	9	5	76	2.95	12	6.33333	0.245833	0.49	108	640	33	1.23	6	5.5	0.205	0.37
1287	F35	26	2021-04-28	Water	Left	Light ON	23	eGFP	Paired	2	Left	27.3	21.6117	9	5	116	12.34	48	2.41667	0.247083	0.89	18	139	28	3.78	16	1.75	0.23625	0.89
1288	F30	32	2021-04-28	Water	Left	Light ON	23	eGFP	Yoked	2	Right	26.9	26.7658	9	5	169	37.45	41	4.12195	0.883415	3.14	382	144	7	0.1	3	2.33333	0.0333333	0.08
1289	F31	34	2021-04-28	Water	Right	Light ON	23	eGFP	Paired	2	Left	27.9	5.37634	9	5	52	4.6	17	3.05882	0.270588	1.33	76	434	4	0.87	2	2	0.435	0.55
1290	F32	36	2021-04-28	Water	Left	Light ON	23	eGFP	Yoked	2	Right	27.5	37.0909	9	5	140	41.93	44	3.18182	0.952955	3.66	88	156	18	10.51	9	2	1.16778	3.66
1291	F34	3	2021-04-29	Water	Left	Light ON	24	eGFP	Paired	2	Left	30.7	32.2476	9	5	199	7.96	52	3.82692	0.152115	1.96	301	131	57	1.65	14	4.07143	0.117857	0.41
1292	F33	15	2021-04-29	Water	Right	Light ON	24	eGFP	Yoked	2	Right	25.8	9.30233	9	5	30	5.35	9	3.33333	0.594444	1.5	202	21	30	5.35	9	3.33333	0.594444	1.5
1293	F35	26	2021-04-29	Water	Left	Light ON	24	eGFP	Paired	2	Left	27.5	18.1818	9	5	62	14.01	32	1.9375	0.396562	2.41	98	219	15	1.64	9	1.66667	0.182222	0.56
1294	F30	32	2021-04-29	Water	Left	Light ON	24	eGFP	Yoked	2	Right	27.6	25	9	5	295	36.85	56	5.26786	0.658036	2.82	1454	101	42	1.07	7	6	0.152857	0.38
1295	F31	34	2021-04-29	Water	Right	Light ON	24	eGFP	Paired	2	Left	27.8	2.15827	9	5	18	3.92	6	3	0.641667	2.02	326	1105	15	3.3	5	3	0.66	2.02
1296	F32	36	2021-04-29	Water	Left	Light ON	24	eGFP	Yoked	2	Right	28	30	9	5	150	26.36	41	3.65854	0.642927	2.77	908	133	23	3.16	8	2.875	0.395	0.84
1297	F34	3	2021-04-30	Water	Left	Light ON	25	eGFP	Paired	4	Left	30.7	62.5407	9	5	540	23.19	121	4.46281	0.19157	1.13	260	115	31	2.48	11	2.81818	0.225455	0.63
1298	F33	15	2021-04-30	Water	Right	Light ON	25	eGFP	Yoked	4	Right	25.8	27.907	9	5	11	1.05	2	5.5	0.525	0.68	955	6	11	1.05	2	5.5	0.525	0.68
1299	F35	26	2021-04-30	Water	Left	Light ON	25	eGFP	Paired	4	Left	27.5	55.2727	9	5	542	14.37	129	4.20155	0.111008	0.73	32	109	18	0.28	7	2.57143	0.04	0.08
1300	F30	32	2021-04-30	Water	Left	Light ON	25	eGFP	Yoked	4	Right	27.6	59.058	9	5	250	53.34	73	3.42466	0.730685	2.81	552	183	11	3.09	2	5.5	1.545	2.08
1301	F31	34	2021-04-30	Water	Right	Light ON	25	eGFP	Paired	4	Left	27.8	27.3381	9	5	248	23.96	61	4.06557	0.392787	2.12	222	231	20	2.45	5	4	0.49	2.12
1302	F32	36	2021-04-30	Water	Left	Light ON	25	eGFP	Yoked	4	Right	28	57.8571	9	5	329	80.3	93	3.53763	0.863441	3.43	218	139	71	9.03	18	3.94444	0.501667	1.69
1303	F34	3	2021-05-03	Water	Left	Light ON	26	eGFP	Paired	2	Left	31	15.8065	9	6	102	6.43	30	3.4	0.214333	0.97	1199	193	4	0.58	1	4	0.58	0.58
1304	F33	15	2021-05-03	Water	Right	Light ON	26	eGFP	Yoked	2	Right	26.2	9.54198	9	6	19	5.65	11	1.72727	0.513636	3.48	212	259	8	1.19	6	1.33333	0.198333	0.42
1305	F35	26	2021-05-03	Water	Left	Light ON	26	eGFP	Paired	2	Left	27.8	14.0288	9	6	52	2.96	22	2.36364	0.134545	0.5	104	312	3	0.17	2	1.5	0.085	0.12
1306	F30	32	2021-05-03	Water	Left	Light ON	26	eGFP	Yoked	2	Right	27.9	14.3369	9	6	18	1.19	6	3	0.198333	0.44	76	540	15	0.54	4	3.75	0.135	0.3
1307	F31	34	2021-05-03	Water	Right	Light ON	26	eGFP	Paired	2	Left	27.9	13.9785	9	6	8	1.51	5	1.6	0.302	0.45	456	141	8	1.51	5	1.6	0.302	0.45
1308	F32	36	2021-05-03	Water	Left	Light ON	26	eGFP	Yoked	2	Right	27.2	26.4706	9	6	14	1.27	9	1.55556	0.141111	0.42	288	789	2	0.12	2	1	0.06	0.07
1309	F34	3	2021-05-04	Water	Left	Light ON	27	eGFP	Paired	2	Left	31	38.3871	9	6	35	7.35	24	1.45833	0.289583	4.02	508	279	5	0.45	4	1.25	0.1125	0.28
1310	F33	15	2021-05-04	Water	Right	Light ON	27	eGFP	Yoked	2	Right	26.2	10.687	9	6	23	23.88	15	1.53333	1.58667	7.84	420	309	7	3.01	5	1.4	0.602	1.67
1311	F35	26	2021-05-04	Water	Left	Light ON	27	eGFP	Paired	2	Left	27.8	19.4245	9	6	130	5.6	37	3.51351	0.149459	0.41	114	171	36	1.49	12	3	0.124167	0.27
1312	F30	32	2021-05-04	Water	Left	Light ON	27	eGFP	Yoked	2	Right	27.9	30.4659	9	6	61	23.29	26	2.34615	0.895769	3.17	572	226	2	0.02	1	2	0.02	0.02
1313	F31	34	2021-05-04	Water	Right	Light ON	27	eGFP	Paired	2	Left	27.9	10.3943	9	6	43	6.7	18	2.38889	0.326111	0.78	120	411	5	1.45	3	1.66667	0.483333	0.78
1314	F32	36	2021-05-04	Water	Left	Light ON	27	eGFP	Yoked	2	Right	27.2	26.1029	9	6	76	25.73	41	1.85366	0.547317	3.13	8	167	16	7.3	7	2.28571	1.04286	3.13
1315	F34	3	2021-05-05	Water	Left	Light ON	28	eGFP	Paired	2	Left	30.8	35.7143	9	6	225	15.21	68	3.30882	0.223676	2.27	366	96	84	3.97	25	3.36	0.1588	0.78
1316	F33	15	2021-05-05	Water	Right	Light ON	28	eGFP	Yoked	2	Right	25.8	8.52713	9	6	27	15.95	18	1.5	0.886111	3.09	204	397	12	6.22	10	1.2	0.622	2.24
1317	F35	26	2021-05-05	Water	Left	Light ON	28	eGFP	Paired	2	Left	27.7	27.4368	9	6	318	21.59	61	5.21311	0.353607	1.43	508	104	38	3.2	11	3.45455	0.290909	1.15
1318	F30	32	2021-05-05	Water	Left	Light ON	28	eGFP	Yoked	2	Right	27.9	17.5627	9	6	76	21.98	25	3.04	0.8392	3.4	166	219	18	1.33	5	3.6	0.266	0.44
1319	F31	34	2021-05-05	Water	Right	Light ON	28	eGFP	Paired	2	Left	27.9	9.67742	9	6	103	18.1	38	2.71053	0.463947	2.37	16	167	84	15.67	31	2.70968	0.505484	2.37
1320	F32	36	2021-05-05	Water	Left	Light ON	28	eGFP	Yoked	2	Right	28.1	31.6726	9	6	211	37.99	67	3.14925	0.566269	2.15	4	99	48	10.32	23	2.08696	0.448696	2.15
1321	F34	3	2021-05-06	Water	Left	Light ON	29	eGFP	Paired	2	Left	30.8	36.039	9	6	385	10.57	91	4.23077	0.116154	0.75	396	73	191	6.24	42	4.54762	0.148571	0.75
1322	F33	15	2021-05-06	Water	Right	Light ON	29	eGFP	Yoked	2	Right	25.8	4.65116	9	6	171	33.95	60	2.85	0.565667	2.1	170	62	161	30.12	56	2.875	0.537857	2.1
1323	F35	26	2021-05-06	Water	Left	Light ON	29	eGFP	Paired	2	Left	27.7	28.8809	9	6	295	25.87	70	4.21429	0.366857	2.49	168	96	71	5.37	19	3.73684	0.282632	1.06
1324	F30	32	2021-05-06	Water	Left	Light ON	29	eGFP	Yoked	2	Right	27.9	15.0538	9	6	16	30.91	12	1.33333	2.49833	6.12	214	360	6	8.88	5	1.2	1.776	4.25
1325	F31	34	2021-05-06	Water	Right	Light ON	29	eGFP	Paired	2	Left	27.9	8.24373	9	6	81	13.96	36	2.25	0.3825	1.83	72	162	42	9.94	22	1.90909	0.451818	1.83
1326	F32	36	2021-05-06	Water	Left	Light ON	29	eGFP	Yoked	2	Right	28.1	28.4698	9	6	128	54.29	68	1.88235	0.756324	3.42	196	100	54	12.64	33	1.63636	0.38303	1.81
1327	F34	3	2021-05-07	Water	Left	Light ON	30	eGFP	Paired	4	Left	31.3	63.5783	9	6	1046	56.13	205	5.10244	0.272829	1.32	327	62	121	6.01	33	3.66667	0.182121	0.72
1328	F33	15	2021-05-07	Water	Right	Light ON	30	eGFP	Yoked	4	Right	26.2	35.4962	9	6	429	21.32	85	5.04706	0.250706	1.06	36	168	34	1.38	9	3.77778	0.153333	0.48
1329	F35	26	2021-05-07	Water	Left	Light ON	30	eGFP	Paired	4	Left	28.3	58.6572	9	6	635	49.65	152	4.17763	0.322961	1.06	182	85	68	5.76	16	4.25	0.36	0.88
1330	F30	32	2021-05-07	Water	Left	Light ON	30	eGFP	Yoked	4	Right	28.9	58.8235	9	6
1331	F31	34	2021-05-07	Water	Right	Light ON	30	eGFP	Paired	4	Left	28.8	49.3056	9	6	140	24.41	70	2	0.326857	1.02	82	203	14	4.3	11	1.27273	0.390909	1.02
1332	F32	36	2021-05-07	Water	Left	Light ON	30	eGFP	Yoked	4	Right	28.4	75	9	6	239	134.23	127	1.88189	0.99874	4.44	122	112	51	13.55	17	3	0.797059	2.9
