# Supplementary material for: The role of anterior insular cortex inputs to dorsolateral striatum in binge alcohol drinking
Source: eLife journal article supplement (doi:10.7554/elife.77411), 2022-07-28
Supplement: fig4-data1 [file Fig4B.xlsx]

## Sheet: Sheet1
	ID	Test	Virus	Time in Zone ON-OFF(S)
0	D1	Pretest	ChR2	69.334
1	D2	Pretest	ChR2	-94.134
3	D4	Pretest	ChR2	-132.867
4	D5	Pretest	ChR2	-43.4
5	D1	RTPP	ChR2	-87.2
6	D2	RTPP	ChR2	206.1
8	D4	RTPP	ChR2	262.967
9	D5	RTPP	ChR2	-40.733
10	D8	Pretest	ChR2	269.767
11	D9	Pretest	ChR2	289.866
12	D11	Pretest	eGFP	79.533
13	D12	Pretest	eGFP	145.966
14	D13	Pretest	eGFP	302
15	D8	RTPP	ChR2	137.566
16	D9	RTPP	ChR2	361.366
17	D11	RTPP	eGFP	469.533
18	D12	RTPP	eGFP	383.299
19	D13	RTPP	eGFP	259.333
20	D17	Pretest	eGFP	53.767
21	D19	Pretest	eGFP	-43.833
22	D21	Pretest	eGFP	-108.5
23	D22	Pretest	eGFP	54.533
24	D17	RTPP	eGFP	409.6
25	D19	RTPP	eGFP	19.333
26	D21	RTPP	eGFP	228.233
27	D22	RTPP	eGFP	-283.999
