# Supplementary material for: The role of anterior insular cortex inputs to dorsolateral striatum in binge alcohol drinking
Source: eLife journal article supplement (doi:10.7554/elife.77411), 2022-07-28
Supplement: fig4-data1 [file Fig4C.xlsx]

## Sheet: Sheet1
	ID	Test	Virus	Distance Traveled ON-OFF
0	D1	Pretest	ChR2	-332.36
1	D2	Pretest	ChR2	60.89
3	D4	Pretest	ChR2	-83.99
4	D5	Pretest	ChR2	-266.49
5	D1	RTPP	ChR2	-698.65
6	D2	RTPP	ChR2	791.28
8	D4	RTPP	ChR2	397.72
9	D5	RTPP	ChR2	-359.65
10	D8	Pretest	ChR2	648.79
11	D9	Pretest	ChR2	870.04
12	D11	Pretest	eGFP	717.15
13	D12	Pretest	eGFP	328.94
14	D13	Pretest	eGFP	1200.58
15	D8	RTPP	ChR2	625.03
16	D9	RTPP	ChR2	1766.13
17	D11	RTPP	eGFP	1498.14
18	D12	RTPP	eGFP	1796.14
19	D13	RTPP	eGFP	1219.33
20	D17	Pretest	eGFP	162.31
21	D19	Pretest	eGFP	980.72
22	D21	Pretest	eGFP	-255.04
23	D22	Pretest	eGFP	1675.2
24	D17	RTPP	eGFP	1812.46
25	D19	RTPP	eGFP	-94.19
26	D21	RTPP	eGFP	1093.48
27	D22	RTPP	eGFP	-344
