# Supplementary material for: The role of anterior insular cortex inputs to dorsolateral striatum in binge alcohol drinking
Source: eLife journal article supplement (doi:10.7554/elife.77411), 2022-07-28
Supplement: fig4-data1 [file Fig4E.xlsx]

## Sheet: Sheet1
	Virus	ID	TimeBin	TimeSpentinLight
0	ChR2	F12	Epoch1	49.9666
1	ChR2	F17	Epoch1	75.9999
2	ChR2	F19	Epoch1	138.833
3	ChR2	F20	Epoch1	77.7666
4	eGFP	F21	Epoch1	73.1333
5	eGFP	F22	Epoch1	48.2
6	eGFP	F23	Epoch1	77.1333
7	eGFP	F24	Epoch1	68.9666
8	ChR2	F25	Epoch1	22.8333
9	ChR2	F26	Epoch1	42.6666
10	eGFP	F28	Epoch1	11.6333
11	eGFP	F29	Epoch1	86.1332
24	ChR2	F12	Epoch2	137.333
25	ChR2	F17	Epoch2	96.4332
26	ChR2	F19	Epoch2	243.8
27	ChR2	F20	Epoch2	90.6999
28	eGFP	F21	Epoch2	44.4666
29	eGFP	F22	Epoch2	241.233
30	eGFP	F23	Epoch2	42.8333
31	eGFP	F24	Epoch2	57.0333
32	ChR2	F25	Epoch2	28.3666
33	ChR2	F26	Epoch2	26.3
34	eGFP	F28	Epoch2	24.7333
35	eGFP	F29	Epoch2	64.7999
48	ChR2	F12	Epoch3	71.6999
49	ChR2	F17	Epoch3	105.167
50	ChR2	F19	Epoch3	273.366
51	ChR2	F20	Epoch3	74.4333
52	eGFP	F21	Epoch3	76.1666
53	eGFP	F23	Epoch3	61.9999
54	eGFP	F24	Epoch3	93.5666
55	ChR2	F25	Epoch3	156.833
56	ChR2	F26	Epoch3	15.6333
57	eGFP	F28	Epoch3	8.93332
58	eGFP	F29	Epoch3	54.2333
