# Supplementary material for: The role of anterior insular cortex inputs to dorsolateral striatum in binge alcohol drinking
Source: eLife journal article supplement (doi:10.7554/elife.77411), 2022-07-28
Supplement: fig4-data1 [file Fig4F.xlsx]

## Sheet: Sheet1
	Virus	LightEntryFrequency
0	ChR2	21
1	ChR2	25
2	ChR2	17
3	ChR2	26
4	eGFP	14
5	eGFP	9
6	eGFP	32
7	eGFP	24
8	ChR2	15
9	ChR2	11
10	eGFP	8
11	eGFP	22
