# Supplementary material for: The role of anterior insular cortex inputs to dorsolateral striatum in binge alcohol drinking
Source: eLife journal article supplement (doi:10.7554/elife.77411), 2022-07-28
Supplement: fig4-data1 [file Fig4G.xlsx]

## Sheet: Sheet1
	Virus	LatencytoDark
0	ChR2	10.01
1	ChR2	10.37
2	ChR2	5.99
3	ChR2	5.21
4	eGFP	5.39
5	eGFP	3.41
6	eGFP	7.36
7	eGFP	7.98
8	ChR2	5.55
9	ChR2	3.91
10	eGFP	7.49
11	eGFP	2.83
