# Supplementary material for: The role of anterior insular cortex inputs to dorsolateral striatum in binge alcohol drinking
Source: eLife journal article supplement (doi:10.7554/elife.77411), 2022-07-28
Supplement: fig4-data1 [file Fig4I.xlsx]

## Sheet: Sheet1
	ID	Session	Virus	Poke	PokeCount
48	O1	1	ChR2	Active	4
49	O1	1	ChR2	Inactive	9
50	O10	1	eGFP	Active	19
51	O10	1	eGFP	Inactive	4
52	O11	1	eGFP	Active	64
53	O11	1	eGFP	Inactive	24
54	O12	1	eGFP	Active	23
55	O12	1	eGFP	Inactive	16
56	O2	1	ChR2	Active	32
57	O2	1	ChR2	Inactive	41
58	O3	1	ChR2	Active	26
59	O3	1	ChR2	Inactive	26
60	O4	1	ChR2	Active	0
61	O4	1	ChR2	Inactive	10
62	O5	1	ChR2	Active	2
63	O5	1	ChR2	Inactive	1
64	O6	1	ChR2	Active	39
65	O6	1	ChR2	Inactive	7
66	O7	1	eGFP	Active	11
67	O7	1	eGFP	Inactive	0
68	O8	1	eGFP	Active	64
69	O8	1	eGFP	Inactive	27
70	O9	1	eGFP	Active	5
71	O9	1	eGFP	Inactive	16
72	O1	2	ChR2	Active	1
73	O1	2	ChR2	Inactive	13
74	O10	2	eGFP	Active	3
75	O10	2	eGFP	Inactive	5
76	O11	2	eGFP	Active	7
77	O11	2	eGFP	Inactive	21
78	O12	2	eGFP	Active	26
79	O12	2	eGFP	Inactive	12
80	O2	2	ChR2	Active	25
81	O2	2	ChR2	Inactive	14
82	O3	2	ChR2	Active	30
83	O3	2	ChR2	Inactive	22
84	O4	2	ChR2	Active	1
85	O4	2	ChR2	Inactive	13
86	O5	2	ChR2	Active	2
87	O5	2	ChR2	Inactive	18
88	O6	2	ChR2	Active	9
89	O6	2	ChR2	Inactive	17
90	O7	2	eGFP	Active	4
91	O7	2	eGFP	Inactive	5
92	O8	2	eGFP	Active	39
93	O8	2	eGFP	Inactive	15
94	O9	2	eGFP	Active	8
95	O9	2	eGFP	Inactive	22
96	O1	3	ChR2	Active	4
97	O1	3	ChR2	Inactive	14
98	O10	3	eGFP	Active	1
99	O10	3	eGFP	Inactive	5
100	O11	3	eGFP	Active	6
101	O11	3	eGFP	Inactive	21
102	O12	3	eGFP	Active	6
103	O12	3	eGFP	Inactive	22
104	O2	3	ChR2	Active	4
105	O2	3	ChR2	Inactive	11
106	O3	3	ChR2	Active	7
107	O3	3	ChR2	Inactive	19
108	O4	3	ChR2	Active	3
109	O4	3	ChR2	Inactive	21
110	O5	3	ChR2	Active	3
111	O5	3	ChR2	Inactive	4
112	O6	3	ChR2	Active	9
113	O6	3	ChR2	Inactive	10
114	O7	3	eGFP	Active	8
115	O7	3	eGFP	Inactive	7
116	O8	3	eGFP	Active	24
117	O8	3	eGFP	Inactive	8
118	O9	3	eGFP	Active	6
119	O9	3	eGFP	Inactive	18
120	O1	4	ChR2	Active	3
121	O1	4	ChR2	Inactive	24
122	O10	4	eGFP	Active	1
123	O10	4	eGFP	Inactive	9
124	O11	4	eGFP	Active	28
125	O11	4	eGFP	Inactive	10
126	O12	4	eGFP	Active	50
127	O12	4	eGFP	Inactive	14
128	O2	4	ChR2	Active	3
129	O2	4	ChR2	Inactive	11
130	O3	4	ChR2	Active	5
131	O3	4	ChR2	Inactive	9
132	O4	4	ChR2	Active	2
133	O4	4	ChR2	Inactive	10
134	O5	4	ChR2	Active	2
135	O5	4	ChR2	Inactive	5
136	O6	4	ChR2	Active	4
137	O6	4	ChR2	Inactive	4
138	O7	4	eGFP	Active	1
139	O7	4	eGFP	Inactive	5
140	O8	4	eGFP	Active	12
141	O8	4	eGFP	Inactive	8
142	O9	4	eGFP	Active	11
143	O9	4	eGFP	Inactive	15
144	O1	5	ChR2	Active	3
145	O1	5	ChR2	Inactive	27
146	O10	5	eGFP	Active	3
147	O10	5	eGFP	Inactive	6
148	O11	5	eGFP	Active	23
149	O11	5	eGFP	Inactive	4
150	O12	5	eGFP	Active
151	O12	5	eGFP	Inactive
152	O2	5	ChR2	Active	15
153	O2	5	ChR2	Inactive	4
154	O3	5	ChR2	Active	5
155	O3	5	ChR2	Inactive	3
156	O4	5	ChR2	Active	2
157	O4	5	ChR2	Inactive	13
158	O5	5	ChR2	Active	2
159	O5	5	ChR2	Inactive	4
160	O6	5	ChR2	Active	8
161	O6	5	ChR2	Inactive	2
162	O7	5	eGFP	Active	3
163	O7	5	eGFP	Inactive	4
164	O8	5	eGFP	Active	7
165	O8	5	eGFP	Inactive	5
166	O9	5	eGFP	Active
167	O9	5	eGFP	Inactive
