# Supplementary material for: The role of anterior insular cortex inputs to dorsolateral striatum in binge alcohol drinking
Source: eLife journal article supplement (doi:10.7554/elife.77411), 2022-07-28
Supplement: fig4-data1 [file Fig4J.xlsx]

## Sheet: Sheet1
	ID	Session	Virus	Active-Inactive
48	O1	1	ChR2	-5
50	O10	1	eGFP	15
52	O11	1	eGFP	40
54	O12	1	eGFP	7
56	O2	1	ChR2	-9
58	O3	1	ChR2	0
60	O4	1	ChR2	-10
62	O5	1	ChR2	1
64	O6	1	ChR2	32
66	O7	1	eGFP	11
68	O8	1	eGFP	37
70	O9	1	eGFP	-11
72	O1	2	ChR2	-12
74	O10	2	eGFP	-2
76	O11	2	eGFP	-14
78	O12	2	eGFP	14
80	O2	2	ChR2	11
82	O3	2	ChR2	8
84	O4	2	ChR2	-12
86	O5	2	ChR2	-16
88	O6	2	ChR2	-8
90	O7	2	eGFP	-1
92	O8	2	eGFP	24
94	O9	2	eGFP	-14
96	O1	3	ChR2	-10
98	O10	3	eGFP	-4
100	O11	3	eGFP	-15
102	O12	3	eGFP	-16
104	O2	3	ChR2	-7
106	O3	3	ChR2	-12
108	O4	3	ChR2	-18
110	O5	3	ChR2	-1
112	O6	3	ChR2	-1
114	O7	3	eGFP	1
116	O8	3	eGFP	16
118	O9	3	eGFP	-12
120	O1	4	ChR2	-21
122	O10	4	eGFP	-8
124	O11	4	eGFP	18
126	O12	4	eGFP	36
128	O2	4	ChR2	-8
130	O3	4	ChR2	-4
132	O4	4	ChR2	-8
134	O5	4	ChR2	-3
136	O6	4	ChR2	0
138	O7	4	eGFP	-4
140	O8	4	eGFP	4
142	O9	4	eGFP	-4
144	O1	5	ChR2	-24
146	O10	5	eGFP	-3
148	O11	5	eGFP	19
150	O12	5	eGFP
152	O2	5	ChR2	11
154	O3	5	ChR2	2
156	O4	5	ChR2	-11
158	O5	5	ChR2	-2
160	O6	5	ChR2	6
162	O7	5	eGFP	-1
164	O8	5	eGFP	2
166	O9	5	eGFP
